# Supplementary material for: Identification of a six-gene metabolic signature predicting overall survival for patients with lung adenocarcinoma
Source: PeerJ. 2020 Dec 2;8:e10320. doi: 10.7717/peerj.10320 (PMC7718790; doi:10.7717/peerj.10320)
Supplement: Supplemental Information 1 [file peerj-08-10320-s001.xls]

## Sheet: TCGA dataset
Id	futime	fustat	age	gender	grade	stage	T	M	N
TCGA-J2-8192	739	0	65	FEMALE	unknow	Stage IIA	T2a	MX	N1
TCGA-91-8499	36	0	76	FEMALE	unknow	Stage IA	T1b	MX	N0
TCGA-53-7624	1043	1	40	FEMALE	unknow	Stage IV	T2	M1	N0
TCGA-55-6986	3261	0	74	FEMALE	unknow	Stage IB	T2	M0	N0
TCGA-38-4632	1357	1	42	MALE	unknow	Stage IV	T2	M1	N1
TCGA-78-7146	173	1	71	FEMALE	unknow	Stage IIIA	T2	M0	N2
TCGA-NJ-A4YG	1904	0	65	MALE	unknow	Stage IB	T2	M0	N0
TCGA-86-8279	482	0	46	MALE	unknow	Stage IIA	T2a	M0	N1
TCGA-50-6591	119	1	63	FEMALE	unknow	Stage IV	T2	M1	N0
TCGA-50-5939	460	1	85	MALE	unknow	Stage IB	T2	M0	N0
TCGA-62-8402	1498	1	73	FEMALE	unknow	Stage IIIA	T2	M0	N2
TCGA-49-4506	999	1	68	FEMALE	unknow	Stage IIB	T2	M0	N1
TCGA-91-6847	842	0	62	FEMALE	unknow	Stage IB	T2	MX	N0
TCGA-73-4659	711	1	66	MALE	unknow	Stage IIIA	T2	M0	N2
TCGA-55-A48Y	630	0	69	MALE	unknow	Stage IIA	T2b	M0	N0
TCGA-50-5049	2146	0	70	MALE	unknow	Stage IA	T2	M0	N0
TCGA-44-3396	411	0	74	FEMALE	unknow	Stage IIIA	T2	M0	N2
TCGA-05-4405	610	0	74	FEMALE	unknow	Stage IB	T2	M0	N0
TCGA-78-8662	3361	1	53	FEMALE	unknow	Stage IB	T2	M0	N0
TCGA-50-8460	829	0	74	MALE	unknow	Stage IA	T1a	M0	N0
TCGA-55-8087	462	0	59	FEMALE	unknow	Stage IB	T2a	MX	N0
TCGA-MP-A4TA	950	1	75	FEMALE	unknow	Stage IA	T1	M0	N0
TCGA-55-7815	773	0	76	MALE	unknow	Stage IB	T2a	MX	N0
TCGA-55-8096	719	1	67	FEMALE	unknow	Stage IB	T2a	MX	N0
TCGA-NJ-A55R	603	0	67	MALE	unknow	Stage IA	T1b	MX	N0
TCGA-91-7771	492	0	62	MALE	unknow	Stage IIB	T3	MX	N0
TCGA-69-7760	202	0	73	MALE	unknow	Stage IIB	T3	M0	N0
TCGA-44-5644	498	0	51	FEMALE	unknow	Stage IB	T2a	unknow	N0
TCGA-69-7973	230	0	42	FEMALE	unknow	Stage IB	T2a	M0	N0
TCGA-44-6145	328	0	62	FEMALE	unknow	Stage IA	T1	M0	N0
TCGA-64-1676	1728	0	58	MALE	unknow	Stage IA	T1a	M0	N0
TCGA-97-7553	1870	0	58	FEMALE	unknow	Stage IA	T1	MX	N0
TCGA-55-8511	552	0	73	FEMALE	unknow	Stage IB	T2a	MX	N0
TCGA-MP-A4TF	336	1	58	FEMALE	unknow	Stage IIA	T2b	M0	N0
TCGA-55-8204	515	0	87	FEMALE	unknow	Stage IB	T2a	MX	N0
TCGA-55-8616	48	0	58	FEMALE	unknow	Stage IB	T2a	M0	N0
TCGA-86-8281	0	0	75	MALE	unknow	Stage IA	T1	M0	NX
TCGA-55-7574	995	1	64	FEMALE	unknow	Stage IB	T2a	M0	N0
TCGA-L9-A743	664	0	56	MALE	unknow	Stage IIA	T2a	M0	N1
TCGA-73-4670	131	0	69	FEMALE	unknow	Stage IV	T2	M1	N0
TCGA-50-5066	944	0	72	MALE	unknow	Stage IB	T2	M0	N0
TCGA-75-5126		0	unknow	FEMALE	unknow	Stage IIIA	T3	M0	N2
TCGA-55-6543	435	0	60	FEMALE	unknow	Stage IA	T1b	MX	N0
TCGA-55-A48Z	651	0	60	FEMALE	unknow	Stage IIIB	T1a	MX	N3
TCGA-L4-A4E5	578	0	48	FEMALE	unknow	Stage I	T1	M0	N0
TCGA-49-4505	428	1	61	FEMALE	unknow	Stage IIB	T2	M0	N1
TCGA-69-7980	411	0	70	FEMALE	unknow	Stage I	T1b	M0	N0
TCGA-55-7725	442	0	68	FEMALE	unknow	Stage IA	T1a	MX	N0
TCGA-78-7162	3169	1	75	MALE	unknow	Stage IA	T1	M0	N0
TCGA-80-5608		0	unknow	FEMALE	unknow	Stage IA	T1	M0	N0
TCGA-78-7159	1221	0	60	FEMALE	unknow	Stage IA	T1	M0	NX
TCGA-MP-A4TI	429	1	72	MALE	unknow	Stage IIA	T2a	M0	N1
TCGA-78-7542	321	1	56	MALE	unknow	Stage IB	T2	M0	N0
TCGA-91-6836	417	0	52	FEMALE	unknow	Stage IB	T2	MX	N0
TCGA-78-7537	1622	1	72	MALE	unknow	Stage IB	T2	M0	N0
TCGA-78-8660	321	1	69	MALE	unknow	Stage IIB	T2	M0	N1
TCGA-49-AARQ	6732	0	41	FEMALE	unknow	Stage I	T2	MX	N0
TCGA-05-4415	91	1	57	MALE	unknow	Stage IIIB	T4	M0	N2
TCGA-86-A4JF	536	0	56	MALE	unknow	Stage IIB	T3	M0	N0
TCGA-86-7701	474	0	66	MALE	unknow	Stage IV	T2	M1	N0
TCGA-44-3918	197	0	60	FEMALE	unknow	Stage IA	T1	M0	N0
TCGA-50-6597	1268	1	79	FEMALE	unknow	Stage IB	T2	M0	N0
TCGA-86-8280	701	0	54	FEMALE	unknow	Stage IIA	T2b	M0	N0
TCGA-44-2666	97	1	43	MALE	unknow	Stage IB	T2	M0	N0
TCGA-78-7154	593	1	72	MALE	unknow	Stage IIIA	T3	M0	N2
TCGA-55-A491	626	0	81	FEMALE	unknow	Stage IA	T1b	MX	N0
TCGA-05-4390	1126	0	58	FEMALE	unknow	Stage IB	T2	M0	N0
TCGA-05-4382	607	0	68	MALE	unknow	Stage IB	T2	M0	N0
TCGA-55-8206	888	0	56	MALE	unknow	Stage IA	T1b	M0	N0
TCGA-55-7576	670	0	54	MALE	unknow	Stage IB	T2a	M0	N0
TCGA-55-8506	11	0	62	FEMALE	unknow	Stage IIB	T3	MX	N0
TCGA-50-5930	282	1	47	MALE	unknow	Stage IIIA	T2	M0	N2
TCGA-05-4403	578	0	76	MALE	unknow	Stage IB	T2	M0	N0
TCGA-55-7911	537	0	70	FEMALE	unknow	Stage IA	T1a	MX	N0
TCGA-78-7143	4961	1	62	FEMALE	unknow	Stage IB	T2	M0	N0
TCGA-62-A46P	594	1	65	MALE	unknow	Stage IB	T2	M0	N0
TCGA-95-8494	84	0	67	MALE	unknow	Stage IIA	T2a	M0	N1
TCGA-35-5375	264	0	61	MALE	unknow	Stage IIIA	T2	M0	N2
TCGA-78-7163	6812	0	60	MALE	unknow	Stage IB	T2	M0	N0
TCGA-05-4417	455	0	51	FEMALE	unknow	Stage IB	T2	M0	N0
TCGA-91-6828	323	0	70	MALE	unknow	Stage IA	T1a	M0	N0
TCGA-44-A47A	466	0	78	FEMALE	unknow	Stage IB	T2a	MX	N0
TCGA-L9-A443	193	1	63	FEMALE	unknow	Stage IA	T1a	MX	N0
TCGA-86-A4D0	116	1	48	MALE	unknow	Stage IIA	T2b	M0	N0
TCGA-44-A479	392	0	73	FEMALE	unknow	Stage IB	T2	MX	N0
TCGA-97-A4LX	614	0	81	MALE	unknow	Stage IB	T2a	M0	N0
TCGA-49-4486	2318	1	72	MALE	unknow	Stage IA	T1	M0	N0
TCGA-50-5932	1235	1	75	MALE	unknow	Stage IIB	T2	M0	N1
TCGA-86-8073	740	0	58	MALE	unknow	Stage IB	T2a	M0	N0
TCGA-55-A494	481	0	61	FEMALE	unknow	Stage IB	T2a	MX	N0
TCGA-69-7765	165	0	56	MALE	unknow	unknow	T4	MX	N0
TCGA-86-8672	19	1	59	MALE	unknow	Stage IIB	T3	M0	N0
TCGA-49-4488	869	1	74	FEMALE	unknow	Stage IA	T1	MX	N0
TCGA-55-7903	567	0	64	MALE	unknow	Stage IA	T1b	MX	N0
TCGA-MP-A4T2	1136	1	71	MALE	unknow	Stage IA	T1	M0	N0
TCGA-49-4487	855	1	72	FEMALE	unknow	Stage IA	T1	M0	N0
TCGA-99-8033	656	1	74	FEMALE	unknow	Stage IV	TX	M1	NX
TCGA-50-5068	1499	1	59	FEMALE	unknow	Stage IIB	T2	MX	N1
TCGA-55-6978	176	1	81	MALE	unknow	Stage IIA	T2b	MX	N0
TCGA-91-A4BC	44	0	59	MALE	unknow	Stage IIA	T2b	MX	N0
TCGA-49-4490	385	1	45	FEMALE	unknow	Stage IIIA	T3	M0	N2
TCGA-86-7955	508	0	62	MALE	unknow	Stage IB	T2a	M0	N0
TCGA-05-4430	761	0	59	FEMALE	unknow	Stage IB	T2	M0	N0
TCGA-44-3398	253	0	77	FEMALE	unknow	Stage IA	T1b	M0	N0
TCGA-49-4507	268	1	73	FEMALE	unknow	Stage IIIA	T3	M0	N1
TCGA-97-A4M5	634	0	83	MALE	unknow	Stage IA	T1b	M0	N0
TCGA-49-6745	522	0	82	MALE	unknow	Stage IIIA	T2a	M0	N2
TCGA-86-8674	405	0	50	MALE	unknow	Stage IIA	T2a	M0	N1
TCGA-05-4384	426	0	66	MALE	unknow	Stage IIIA	T2	M0	N2
TCGA-78-7147	586	1	67	FEMALE	unknow	Stage IIB	T2	M0	N1
TCGA-93-7347	297	0	76	FEMALE	unknow	Stage IA	T1a	MX	N0
TCGA-49-4514	1700	0	79	FEMALE	unknow	Stage IA	T1	M0	N0
TCGA-MN-A4N1	827	0	60	MALE	unknow	Stage IIA	T2a	M0	N1
TCGA-J2-A4AD	550	1	61	FEMALE	unknow	Stage IA	T1a	MX	N0
TCGA-78-7160	678	0	61	MALE	unknow	Stage IV	T4	M1	N2
TCGA-05-4397	731	1	65	MALE	unknow	Stage IIB	T2	M0	N1
TCGA-91-8497	434	1	75	FEMALE	unknow	Stage IA	T1a	MX	N0
TCGA-55-7283	609	0	76	FEMALE	unknow	Stage IIIA	T3	MX	N2
TCGA-05-4244	0	0	70	MALE	unknow	Stage IV	T2	M1	N2
TCGA-91-6848	224	0	59	MALE	unknow	Stage IIIA	T2	MX	N2
TCGA-MP-A4TD	307	1	71	MALE	unknow	Stage IIIA	T2	M0	N2
TCGA-55-8620	375	1	60	MALE	unknow	Stage IV	T1a	M1b	N1
TCGA-97-7547	1965	0	67	FEMALE	unknow	Stage IB	T2	MX	N0
TCGA-44-6777	987	1	85	FEMALE	unknow	Stage IB	T2	MX	NX
TCGA-38-4629	864	1	68	MALE	unknow	Stage IIB	T3	M0	N0
TCGA-55-8097	476	0	60	FEMALE	unknow	Stage IA	T1a	MX	N0
TCGA-78-8648	1209	1	58	FEMALE	unknow	Stage IIB	T3	M0	N0
TCGA-75-5125		0	unknow	MALE	unknow	Stage IIB	T2	M0	N1
TCGA-95-7944	21	0	71	MALE	unknow	Stage IA	T1a	M0	N0
TCGA-44-6147	441	0	67	FEMALE	unknow	Stage IA	T1b	M0	NX
TCGA-55-7727	119	0	70	MALE	unknow	Stage IIIA	T1a	MX	N2
TCGA-95-7039	34	0	54	FEMALE	unknow	Stage IIB	T3	MX	N0
TCGA-55-6975	118	1	61	MALE	unknow	Stage IIB	T2	M0	N1
TCGA-05-4433	730	0	82	MALE	unknow	Stage IB	T2	M0	N0
TCGA-05-4427	791	0	65	FEMALE	unknow	Stage IIB	T2	M0	N1
TCGA-86-7711	630	0	70	MALE	unknow	Stage IIA	T2a	M0	N1
TCGA-44-2661	446	0	69	FEMALE	unknow	Stage IA	T1	M0	N0
TCGA-55-6981	1379	1	53	FEMALE	unknow	Stage IIIA	T1	M0	N2
TCGA-MP-A4TH	446	0	70	FEMALE	unknow	Stage IA	T1a	M0	N0
TCGA-55-8299	469	1	61	FEMALE	unknow	Stage IA	T1b	MX	N0
TCGA-L4-A4E6	435	0	67	MALE	unknow	Stage IA	T1	M0	N0
TCGA-44-A47F	337	0	74	MALE	unknow	Stage IIB	T2b	M0	N1
TCGA-55-7913	561	1	61	FEMALE	unknow	Stage IA	T1b	MX	N0
TCGA-38-4628	1492	1	65	FEMALE	unknow	Stage IIB	T2	M0	N1
TCGA-67-6215	174	0	52	FEMALE	unknow	Stage IB	T2a	M0	N0
TCGA-NJ-A7XG	617	0	49	MALE	unknow	Stage IIIA	T4	M0	N1
TCGA-67-3772	573	0	82	FEMALE	unknow	Stage IB	T2	M0	N0
TCGA-S2-AA1A	513	0	68	FEMALE	unknow	Stage IA	T1b	M0	N0
TCGA-49-6767	677	0	46	FEMALE	unknow	Stage IIB	T3	MX	N0
TCGA-55-6980	2109	0	56	MALE	unknow	Stage IA	T1	M0	N0
TCGA-44-6144	407	0	58	MALE	unknow	Stage IA	T1a	M0	N0
TCGA-44-5645	383	0	61	FEMALE	unknow	Stage IA	T1	unknow	NX
TCGA-MP-A4T7	167	1	75	FEMALE	unknow	Stage IV	T2	M1	N0
TCGA-62-A46V	2199	0	78	FEMALE	unknow	Stage IB	T2	M0	N0
TCGA-44-6774	361	0	56	FEMALE	unknow	Stage IIIA	T1	M0	N2
TCGA-55-8621	515	0	75	FEMALE	unknow	Stage IA	T1a	MX	N0
TCGA-05-4396	303	1	76	MALE	unknow	Stage IIIB	T4	M0	N1
TCGA-55-7573	487	0	72	FEMALE	unknow	Stage IA	T1b	MX	N0
TCGA-49-AARR	4992	0	68	MALE	unknow	Stage IA	T1	MX	N0
TCGA-97-A4M3	540	0	69	FEMALE	unknow	Stage IA	T1b	M0	N0
TCGA-49-AARO	3759	0	39	FEMALE	unknow	Stage IA	T1a	MX	N0
TCGA-91-6830	60	0	65	FEMALE	unknow	Stage IIA	T1	MX	N1
TCGA-38-6178	448	0	70	FEMALE	unknow	Stage IIIA	T2b	unknow	N2
TCGA-55-8091	600	0	74	MALE	unknow	Stage IB	T2	MX	N0
TCGA-55-8507	418	0	53	MALE	unknow	Stage IA	T1a	MX	N0
TCGA-75-7030		0	unknow	MALE	unknow	Stage IIB	T3	M0	N0
TCGA-86-A456	405	0	78	FEMALE	unknow	Stage IA	T1a	M0	N0
TCGA-55-A492	596	0	70	FEMALE	unknow	Stage IA	T1a	MX	N0
TCGA-64-1678	1189	0	70	FEMALE	unknow	unknow	T2b	M0	N0
TCGA-62-8399	2696	0	62	MALE	unknow	Stage IIIA	T2	M0	N2
TCGA-55-6985	1233	0	58	FEMALE	unknow	Stage IB	T2	MX	N0
TCGA-44-8120	260	0	58	MALE	unknow	Stage IB	T2a	M0	N0
TCGA-50-5935	653	1	86	FEMALE	unknow	Stage IA	T1	M0	N0
TCGA-50-5044	624	1	72	FEMALE	unknow	Stage IIIB	T4	M0	N1
TCGA-55-8085	904	0	64	MALE	unknow	Stage IA	T1b	M0	N0
TCGA-L9-A444	307	0	60	FEMALE	unknow	Stage IA	T1a	MX	N0
TCGA-55-8615	446	0	67	MALE	unknow	Stage IIIA	T3	MX	N2
TCGA-97-A4M0	652	0	60	FEMALE	unknow	Stage IB	T2a	M0	N0
TCGA-95-7562	87	1	71	MALE	unknow	Stage IIA	T2a	M0	N1
TCGA-38-4626	2595	0	57	FEMALE	unknow	unknow	T2b	M0	N0
TCGA-67-6216	141	0	57	FEMALE	unknow	Stage IA	T1a	M0	N0
TCGA-75-6203		0	unknow	FEMALE	unknow	Stage IIIA	T2	M0	N2
TCGA-67-3773	427	0	84	FEMALE	unknow	Stage IB	T2	M0	N0
TCGA-78-7161	215	0	69	FEMALE	unknow	Stage IIB	T3	M0	N0
TCGA-NJ-A4YQ	886	0	69	FEMALE	unknow	Stage IA	T1b	M0	N0
TCGA-50-5072	250	1	74	MALE	unknow	Stage IIIA	T2	M0	N2
TCGA-50-5931	434	1	75	FEMALE	unknow	Stage IB	T2	M0	N0
TCGA-49-AARN	1135	1	56	FEMALE	unknow	Stage IA	T1	MX	N0
TCGA-64-1681	1167	1	61	FEMALE	unknow	Stage IA	T1	M0	N0
TCGA-99-7458	392	0	74	FEMALE	unknow	Stage IIIA	T4	M0	N0
TCGA-35-4122	225	0	69	MALE	unknow	Stage IA	T1	M0	N0
TCGA-44-7672	418	0	52	FEMALE	unknow	Stage IA	T1b	M0	N0
TCGA-44-7662	218	0	61	MALE	unknow	Stage IB	T2a	MX	N0
TCGA-86-7714	625	1	61	FEMALE	unknow	Stage IIIA	T1b	M0	N2
TCGA-97-7552	1932	0	70	MALE	unknow	Stage IB	T2	MX	N0
TCGA-44-5643	417	0	53	MALE	unknow	Stage IIIA	T2b	M0	N2
TCGA-75-7025		0	unknow	MALE	unknow	Stage IB	T2	M0	N0
TCGA-78-8655	2360	0	77	FEMALE	unknow	Stage IA	T1	M0	N0
TCGA-97-7937	564	0	65	MALE	unknow	Stage IB	T2a	MX	N0
TCGA-64-1679	1686	0	58	FEMALE	unknow	Stage IIIA	T1	M0	N2
TCGA-86-A4P8	431	0	59	FEMALE	unknow	Stage IIIA	T1b	MX	N2
TCGA-55-8205	599	0	76	FEMALE	unknow	Stage IIA	T2b	M0	N0
TCGA-44-2668	246	0	51	MALE	unknow	Stage IB	T2	M0	N0
TCGA-NJ-A4YP	50	0	52	MALE	unknow	Stage IB	T2a	M0	N0
TCGA-49-4494	1081	1	77	MALE	unknow	Stage IIIA	T3	M0	N2
TCGA-49-AAR9	260	1	61	MALE	unknow	Stage IIB	T3	MX	N0
TCGA-38-4625	2973	0	66	FEMALE	unknow	Stage IB	T2a	M0	N0
TCGA-44-7661	366	0	69	FEMALE	unknow	Stage IB	T2a	M0	N0
TCGA-55-7726	652	0	72	FEMALE	unknow	Stage IA	T1b	MX	N0
TCGA-75-6205		1	unknow	FEMALE	unknow	Stage IB	T2a	M0	N0
TCGA-55-6972	1632	1	72	MALE	unknow	Stage IB	T2	M0	N0
TCGA-86-8359	444	1	52	MALE	unknow	Stage IIIA	T3	M0	N2
TCGA-50-6673	22	1	84	FEMALE	unknow	Stage I	T1	M0	N0
TCGA-44-3917	392	0	33	FEMALE	unknow	Stage IB	T2	M0	N0
TCGA-95-7567	163	0	61	MALE	unknow	Stage IIB	T2b	M0	N1
TCGA-64-1677	628	1	77	FEMALE	unknow	Stage IIIA	T2	M0	N2
TCGA-50-5942	883	0	67	FEMALE	unknow	Stage IA	T1	M0	N0
TCGA-38-4627	1147	1	64	FEMALE	unknow	Stage IIA	T1b	M0	N1
TCGA-86-8055	124	1	79	MALE	unknow	Stage IIA	T2a	M0	N1
TCGA-55-A4DF	440	1	88	MALE	unknow	Stage IA	T1b	MX	N0
TCGA-44-2664	383	0	66	FEMALE	unknow	Stage IA	T1	M0	N0
TCGA-44-A47B	287	0	79	MALE	unknow	Stage IB	T2a	M0	N0
TCGA-62-A46R	1725	1	54	FEMALE	unknow	Stage IB	T2	M0	N0
TCGA-71-8520	210	1	60	FEMALE	unknow	Stage IB	T2	M0	N0
TCGA-80-5611		0	unknow	MALE	unknow	Stage IB	T2	M0	N0
TCGA-05-4250	121	1	79	FEMALE	unknow	Stage IIIA	T3	M0	N1
TCGA-78-7158	179	1	59	FEMALE	unknow	Stage IIIB	T4	M0	N2
TCGA-53-7813	424	0	51	FEMALE	unknow	Stage IIIB	T4	M0	N0
TCGA-55-6970	464	1	67	FEMALE	unknow	Stage IIIA	T2	MX	N2
TCGA-73-A9RS	340	1	41	MALE	unknow	Stage IIB	T3	M0	N0
TCGA-69-7764	414	0	75	MALE	unknow	Stage IA	T1b	M0	N0
TCGA-55-8094	541	0	51	MALE	unknow	Stage IV	T2b	M1b	N0
TCGA-95-A4VN	553	0	62	FEMALE	unknow	Stage IIA	T2a	M0	N1
TCGA-69-8254	409	0	85	MALE	unknow	unknow	T2b	unknow	unknow
TCGA-49-AAR3	1893	0	69	MALE	unknow	Stage IIB	T2	MX	N1
TCGA-49-4510	896	1	51	FEMALE	unknow	Stage IIB	T2	M0	N1
TCGA-55-7281	872	0	70	FEMALE	unknow	Stage IA	T1b	M0	N0
TCGA-69-7763	690	0	69	MALE	unknow	Stage IA	T1b	M0	N0
TCGA-78-7148	626	1	71	MALE	unknow	Stage IIB	T2	M0	N1
TCGA-97-A4M7	629	0	74	MALE	unknow	Stage IA	T1b	M0	N0
TCGA-86-8668	423	0	61	FEMALE	unknow	Stage IA	T1b	M0	N0
TCGA-49-AAQV	677	1	63	FEMALE	unknow	Stage II	T1	MX	N1
TCGA-71-6725	256	0	48	FEMALE	unknow	Stage IB	T2	M0	N0
TCGA-55-7570	824	0	60	MALE	unknow	Stage IA	T1a	MX	N0
TCGA-05-4402	244	1	57	FEMALE	unknow	Stage IV	T2	M1	NX
TCGA-67-4679	448	0	69	MALE	unknow	unknow	T3	M0	N0
TCGA-05-4422	365	0	68	MALE	unknow	Stage IB	T2	M0	N0
TCGA-55-7227	952	1	77	MALE	unknow	Stage IIIA	T3	MX	N1
TCGA-55-1594	1178	0	68	MALE	unknow	Stage IIIA	T2	M0	N2
TCGA-49-AAR4	879	1	51	MALE	unknow	Stage IIIA	T2	MX	N2
TCGA-62-A46Y	414	1	70	FEMALE	unknow	Stage IIIA	T2	M0	N2
TCGA-62-A46S	1653	1	73	MALE	unknow	Stage IB	T2	M0	N0
TCGA-97-8177	499	0	59	FEMALE	unknow	Stage IB	T2a	M0	N0
TCGA-05-5425	882	0	68	MALE	unknow	Stage IIB	T2b	M0	N1
TCGA-49-6744	890	0	64	FEMALE	unknow	Stage IIA	T2a	MX	N1
TCGA-44-6778	1110	0	59	MALE	unknow	Stage IA	T1	MX	N0
TCGA-75-6206		0	unknow	MALE	unknow	Stage IB	T2	M0	N0
TCGA-80-5607		0	unknow	FEMALE	unknow	Stage IIB	T2	M0	N1
TCGA-NJ-A4YF	2161	0	50	FEMALE	unknow	Stage IA	T1	M0	N0
TCGA-78-7220	807	1	53	FEMALE	unknow	Stage IIIA	T2	M0	N2
TCGA-50-6595	189	1	74	FEMALE	unknow	Stage IIIA	T2	M0	N2
TCGA-78-7167	2681	1	77	MALE	unknow	Stage IV	T2	M1	N0
TCGA-95-7948	133	0	42	FEMALE	unknow	Stage IB	T2a	M0	N0
TCGA-75-6207		1	unknow	MALE	unknow	Stage IIIA	T2	M0	N2
TCGA-05-4389	1369	0	70	MALE	unknow	Stage IA	T1	M0	N0
TCGA-05-5429	275	1	60	MALE	unknow	Stage IIIA	T3	M0	N2
TCGA-55-7907	343	1	77	MALE	unknow	Stage IIA	T2a	MX	N1
TCGA-67-3776	61	0	57	FEMALE	unknow	Stage IIB	T2	M0	N1
TCGA-73-4677	38	1	74	MALE	unknow	unknow	T2a	M0	N0
TCGA-75-5147		0	unknow	FEMALE	unknow	Stage IB	T2	M0	N0
TCGA-50-5045	2174	1	57	FEMALE	unknow	unknow	T2	M0	N1
TCGA-44-A4SU	409	1	67	FEMALE	unknow	Stage IA	T1a	MX	N0
TCGA-55-8301	534	0	58	MALE	unknow	Stage IB	T2a	MX	N0
TCGA-55-1596	2065	0	55	MALE	unknow	Stage IIB	T2	M0	N1
TCGA-55-A4DG	608	0	71	MALE	unknow	Stage IA	T1b	MX	N0
TCGA-49-AARE	1229	1	51	FEMALE	unknow	Stage IA	T1	MX	N0
TCGA-50-6592	777	1	71	FEMALE	unknow	Stage IB	T2	M0	N0
TCGA-J2-A4AG	500	0	66	FEMALE	unknow	Stage IA	T1b	MX	N0
TCGA-67-3771	610	0	77	FEMALE	unknow	Stage IA	T1	M0	N0
TCGA-73-4662	912	0	65	FEMALE	unknow	Stage IA	T1	M0	N0
TCGA-05-5420	457	0	67	MALE	unknow	Stage IIIA	T2	M0	N2
TCGA-86-8056	139	0	63	FEMALE	unknow	Stage IIIA	T4	M0	N0
TCGA-J2-A4AE	671	0	77	FEMALE	unknow	Stage IA	T1a	MX	N0
TCGA-44-7669	574	1	59	MALE	unknow	Stage IIA	T1b	MX	N1
TCGA-44-8119	285	0	73	MALE	unknow	Stage IIB	T3	M0	N0
TCGA-50-5941	567	0	55	FEMALE	unknow	Stage IIIA	T2a	M0	N2
TCGA-64-5781	1202	0	55	FEMALE	unknow	Stage IB	T2	M0	N0
TCGA-73-4666	800	0	52	FEMALE	unknow	Stage IV	T1	M1	N0
TCGA-L9-A8F4	476	0	64	FEMALE	unknow	Stage IB	T2a	MX	N0
TCGA-69-8253	426	0	59	FEMALE	unknow	Stage IIA	T1a	MX	N1
TCGA-97-8552	626	0	55	FEMALE	unknow	Stage I	T1a	MX	N0
TCGA-44-6776	1938	0	60	FEMALE	unknow	Stage IA	T1	MX	N0
TCGA-L9-A5IP	58	1	40	FEMALE	unknow	Stage IV	T3	M1b	N2
TCGA-38-4630	1073	1	75	FEMALE	unknow	Stage IB	T2	M0	N0
TCGA-95-7947	40	0	67	MALE	unknow	Stage IA	T1a	M0	N0
TCGA-4B-A93V	254	0	52	FEMALE	unknow	Stage IA	T1b	M0	N0
TCGA-86-8076	489	0	42	MALE	unknow	Stage IA	T1	M0	N0
TCGA-05-4410	0	0	62	MALE	unknow	Stage IB	T2	M0	N0
TCGA-62-A472	910	0	70	MALE	unknow	Stage IIB	T3	M0	N0
TCGA-55-6968	1293	1	61	MALE	unknow	Stage IV	T1	M1	N0
TCGA-55-8514	520	0	70	FEMALE	unknow	Stage IB	T2a	MX	N0
TCGA-75-7031		0	unknow	FEMALE	unknow	Stage IB	T2	M0	N0
TCGA-62-8397	1289	0	70	FEMALE	unknow	Stage IIB	T3	M0	N0
TCGA-86-7953	591	0	69	FEMALE	unknow	Stage IA	T1b	M0	N0
TCGA-75-5146		0	unknow	MALE	unknow	Stage IB	T2	M0	N0
TCGA-44-A47G	351	0	73	FEMALE	unknow	Stage IA	T1	M0	N0
TCGA-86-8671	839	0	72	FEMALE	unknow	Stage IIB	T2b	M0	N1
TCGA-86-8358	653	0	44	MALE	unknow	Stage IB	T2a	M0	N0
TCGA-05-4432	761	0	66	MALE	unknow	Stage IIB	T2	M0	N1
TCGA-86-8669	938	0	64	MALE	unknow	Stage IA	T1b	M0	N0
TCGA-95-A4VK	651	0	74	FEMALE	unknow	Stage IIIA	T2b	M0	N2
TCGA-44-7670	531	0	47	FEMALE	unknow	Stage IIA	T1b	M0	N1
TCGA-73-7499	715	0	81	FEMALE	unknow	Stage IB	T2a	M0	N0
TCGA-62-A46U	2067	0	71	FEMALE	unknow	Stage IIB	T2	M0	N1
TCGA-44-2657	400	0	74	FEMALE	unknow	Stage IB	T2	M0	NX
TCGA-97-8171	568	0	81	MALE	unknow	Stage IV	T2a	M1a	N2
TCGA-78-7633	994	0	67	MALE	unknow	Stage IB	T2	M0	N0
TCGA-64-5775	62	1	71	MALE	unknow	Stage IIIA	T4	M0	N0
TCGA-J2-8194	724	0	69	FEMALE	unknow	Stage IIB	T3	MX	N0
TCGA-78-7539	327	0	75	FEMALE	unknow	Stage IIA	T2b	M0	N0
TCGA-91-6829	1258	1	78	MALE	unknow	Stage IB	T2	MX	N0
TCGA-99-8028	1118	0	50	FEMALE	unknow	Stage IA	T1a	M0	N0
TCGA-78-7153	760	0	65	FEMALE	unknow	Stage IB	T2	M0	N0
TCGA-L9-A50W	442	1	75	MALE	unknow	Stage IIA	T1b	MX	N1
TCGA-50-6594	370	1	79	FEMALE	unknow	Stage IIIA	T3	M0	N2
TCGA-05-5428	670	0	57	MALE	unknow	Stage IIA	T1b	M0	N1
TCGA-55-5899	930	0	58	MALE	unknow	unknow	T1a	M0	N1
TCGA-44-7659	444	0	70	MALE	unknow	Stage IA	T1b	MX	N0
TCGA-55-7816	468	1	49	FEMALE	unknow	Stage IV	TX	MX	NX
TCGA-05-4425	669	0	70	FEMALE	unknow	Stage IV	T2	M1	N0
TCGA-44-2665	400	0	55	FEMALE	unknow	Stage IIB	T2	M0	N1
TCGA-05-4424	913	0	70	MALE	unknow	Stage IIB	T3	M0	N0
TCGA-78-7156	976	1	62	MALE	unknow	Stage IV	T4	M1	N1
TCGA-49-4512	905	1	69	FEMALE	unknow	Stage IIIA	T2	MX	N2
TCGA-78-7536	244	1	69	MALE	unknow	Stage IIIA	T2	M0	N2
TCGA-97-8175	551	0	55	FEMALE	unknow	Stage IB	T2a	M0	N0
TCGA-49-4501	1421	1	67	FEMALE	unknow	Stage IB	T2	M0	N0
TCGA-53-7626	929	1	76	FEMALE	unknow	Stage IIA	T1	M0	N1
TCGA-55-6984	760	1	71	FEMALE	unknow	Stage IIB	T2	M0	N1
TCGA-44-2659	529	0	65	FEMALE	unknow	Stage IIB	T1	M0	N1
TCGA-MP-A4SW	1778	1	53	MALE	unknow	Stage IIB	T2	M0	N1
TCGA-55-A48X	689	0	63	FEMALE	unknow	Stage IIA	T1b	M0	N1
TCGA-55-1592	701	1	65	MALE	unknow	Stage IA	T2	M0	N0
TCGA-86-8673	455	0	61	MALE	unknow	Stage IB	T2	M0	N0
TCGA-35-4123	182	0	38	MALE	unknow	Stage IA	T1	M0	N0
TCGA-78-8640	6528	0	59	MALE	unknow	Stage IIA	T1	M0	N1
TCGA-75-7027		0	unknow	MALE	unknow	Stage IB	T2	M0	N0
TCGA-99-8032	44	0	61	MALE	unknow	Stage IA	T1a	M0	N0
TCGA-49-6761	354	0	68	FEMALE	unknow	Stage IIIA	T1	MX	N2
TCGA-MP-A4SY	1501	1	61	MALE	unknow	Stage IIB	T2	M0	N1
TCGA-55-A490	99	1	78	MALE	unknow	Stage IIA	T2b	MX	N0
TCGA-93-7348	127	0	75	FEMALE	unknow	Stage IA	T1a	MX	N0
TCGA-49-AAR0	4655	0	57	MALE	unknow	Stage IA	T1	MX	N0
TCGA-93-A4JP	578	0	64	MALE	unknow	Stage IV	TX	M1b	NX
TCGA-55-6979	237	1	59	FEMALE	unknow	Stage IIB	T2	M0	N1
TCGA-73-7498	1189	0	58	FEMALE	unknow	Stage IA	T1b	M0	N0
TCGA-MP-A4T8	161	1	68	MALE	unknow	Stage IIIA	T2	M0	N2
TCGA-50-6590	1288	1	72	FEMALE	unknow	Stage IB	T2	M0	N0
TCGA-64-5815	224	0	74	MALE	unknow	Stage IIB	T2	M0	N1
TCGA-78-7540	881	0	66	FEMALE	unknow	Stage IB	T2	M0	N0
TCGA-55-8510	539	0	55	FEMALE	unknow	Stage IB	T2a	MX	N0
TCGA-44-7671	535	0	64	MALE	unknow	Stage IB	T2a	M0	N0
TCGA-91-8496	505	0	63	FEMALE	unknow	Stage IB	T2a	MX	NX
TCGA-55-8089	702	1	56	MALE	unknow	Stage IA	T1a	M0	N0
TCGA-99-AA5R	658	0	70	FEMALE	unknow	Stage IA	T1a	M0	N0
TCGA-55-8505	440	0	62	MALE	unknow	Stage IIIA	T1a	MX	N2
TCGA-05-5423	151	0	65	MALE	unknow	Stage IIB	T2	M0	N1
TCGA-55-8614	536	0	76	MALE	unknow	Stage IB	T2a	MX	N0
TCGA-50-5946	686	0	62	MALE	unknow	Stage IA	T1	MX	N0
TCGA-05-4245	730	0	81	MALE	unknow	Stage IIIA	T2	M0	N2
TCGA-91-A4BD	603	0	78	MALE	unknow	Stage IIA	T1b	MX	N1
TCGA-55-8512	607	1	41	MALE	unknow	Stage IV	T1a	M1b	N1
TCGA-05-4434	457	1	67	FEMALE	unknow	Stage IV	T4	M1	N1
TCGA-97-A4M6	568	0	45	FEMALE	unknow	Stage IA	T1a	M0	N0
TCGA-86-7954	605	0	68	FEMALE	unknow	Stage IB	T2	M0	N0
TCGA-78-7150	666	1	59	MALE	unknow	Stage IIB	T2	M0	N1
TCGA-69-8255	129	0	71	MALE	unknow	Stage IA	T1a	M0	N0
TCGA-55-8208	674	0	73	FEMALE	unknow	Stage IA	T1b	M0	N0
TCGA-50-5051	478	1	42	FEMALE	unknow	Stage IIIA	T2	M0	N2
TCGA-55-7910	1040	0	50	FEMALE	unknow	Stage IIA	T2b	M0	N0
TCGA-38-7271	800	1	72	FEMALE	unknow	Stage IA	T1	M0	N0
TCGA-86-8585	353	0	57	MALE	unknow	Stage IB	T2a	M0	N0
TCGA-86-8075	479	0	66	FEMALE	unknow	Stage IB	T2	M0	N0
TCGA-73-4676	164	0	45	MALE	unknow	Stage IIA	T2a	M0	N1
TCGA-50-5933	2393	1	72	MALE	unknow	Stage IIIB	T4	M0	N2
TCGA-73-4675	40	0	59	MALE	unknow	Stage IIIA	T3	M0	N1
TCGA-55-6987	2137	0	77	MALE	unknow	Stage IA	T1	M0	N0
TCGA-50-5055	1830	1	79	FEMALE	unknow	Stage IIA	T1	M0	N1
TCGA-MN-A4N5	84	0	63	MALE	unknow	Stage IA	T1a	M0	N0
TCGA-55-6971	1400	0	59	FEMALE	unknow	Stage IB	T2	MX	N0
TCGA-69-7974	184	0	54	FEMALE	unknow	Stage IIIA	T2a	MX	N2
TCGA-44-6779	500	1	50	FEMALE	unknow	Stage IIB	T2	MX	N1
TCGA-MP-A4TC	74	1	77	MALE	unknow	Stage IIIA	T1	M0	N2
TCGA-55-8302	478	0	54	MALE	unknow	Stage IB	T2	MX	N0
TCGA-67-3774	385	0	73	FEMALE	unknow	Stage IB	T2	M0	N0
TCGA-55-A493	28	0	54	FEMALE	unknow	Stage IB	T2a	M0	N0
TCGA-50-7109	308	1	60	MALE	unknow	Stage IA	T1	M0	N0
TCGA-55-6982	995	1	79	FEMALE	unknow	Stage IIB	T2	M0	N1
TCGA-86-8074	24	0	62	FEMALE	unknow	Stage IIA	T1b	M0	N1
TCGA-69-A59K	591	0	60	FEMALE	unknow	Stage IIB	T3	M0	N0
TCGA-55-8090	598	1	80	MALE	unknow	Stage IA	T1a	M0	N0
TCGA-97-A4M2	624	0	66	MALE	unknow	Stage IA	T1a	M0	N0
TCGA-MP-A4T9	1265	1	54	FEMALE	unknow	Stage IIIA	T2	MX	N2
TCGA-MP-A4TK	582	1	56	FEMALE	unknow	Stage IIB	T2	MX	N1
TCGA-91-6849	35	0	75	FEMALE	unknow	Stage IIIA	T2	MX	N2
TCGA-50-6593	336	1	49	FEMALE	unknow	Stage IIIA	T1	M0	N2
TCGA-95-7043	2	0	63	FEMALE	unknow	Stage IA	T1a	MX	N0
TCGA-55-7724	705	0	76	FEMALE	unknow	Stage IB	T2a	MX	N0
TCGA-44-7667	557	0	49	FEMALE	unknow	Stage IIB	T3	MX	N0
TCGA-44-8117	385	0	54	FEMALE	unknow	Stage IB	T2a	M0	N0
TCGA-MP-A5C7	1862	0	76	FEMALE	unknow	Stage IB	T2	M0	N0
TCGA-75-6214		0	unknow	FEMALE	unknow	Stage IIIA	T2	M0	N2
TCGA-86-7713	422	0	70	MALE	unknow	Stage IIA	T2b	M0	N0
TCGA-75-6212		0	unknow	FEMALE	unknow	Stage IIB	T2	M0	N1
TCGA-62-8394	139	1	65	FEMALE	unknow	Stage IIIB	T4	M0	N2
TCGA-64-5778	926	0	60	MALE	unknow	Stage IB	T2	M0	N0
TCGA-97-8174	164	1	67	MALE	unknow	Stage IIA	T2b	M0	N0
TCGA-50-8457	779	0	63	FEMALE	unknow	Stage IA	T1a	M0	N0
TCGA-97-A4M1	601	0	52	FEMALE	unknow	Stage IA	T1a	M0	N0
TCGA-78-7166	258	1	84	MALE	unknow	Stage IIB	T2	M0	N1
TCGA-83-5908	824	0	59	FEMALE	unknow	Stage IA	T1	M0	N0
TCGA-05-4426	791	0	71	MALE	unknow	Stage IB	T2	M0	N0
TCGA-55-7995	889	0	73	FEMALE	unknow	Stage IA	T1b	M0	N0
TCGA-93-8067	186	0	77	MALE	unknow	Stage IB	T2a	MX	N0
TCGA-55-7284	243	1	74	MALE	unknow	Stage IIB	T3	MX	N0
TCGA-55-1595	1479	0	74	FEMALE	unknow	Stage IA	T1	M0	N0
TCGA-44-2655	575	0	65	FEMALE	unknow	Stage IA	T1	M0	N0
TCGA-91-6835	79	0	81	FEMALE	unknow	Stage IA	T1	M0	N0
TCGA-97-7938	18	1	76	FEMALE	unknow	Stage IA	T1a	MX	N0
TCGA-69-7978	134	0	59	MALE	unknow	Stage IIB	T2b	MX	N1
TCGA-55-7994	603	0	81	MALE	unknow	Stage IIB	T3	MX	N0
TCGA-78-7149	1093	0	71	MALE	unknow	Stage IIIB	T4	M0	N0
TCGA-38-4631	354	1	72	FEMALE	unknow	Stage IB	T2	M0	N0
TCGA-44-2662	480	0	65	MALE	unknow	Stage IB	T2	M0	N0
TCGA-MP-A4SV	2620	1	67	MALE	unknow	Stage IB	T2	M0	N0
TCGA-L9-A7SV	565	0	69	MALE	unknow	Stage IIA	T2a	M0	N1
TCGA-35-3615	14	0	57	MALE	unknow	Stage IB	T2	M0	N0
TCGA-05-4418	274	1	69	MALE	unknow	Stage IIIA	T3	M0	N2
TCGA-05-4249	1523	0	67	MALE	unknow	Stage IB	T2	M0	N0
TCGA-MN-A4N4	1175	0	57	MALE	unknow	Stage IA	T1b	M0	N0
TCGA-73-4658	1600	1	80	FEMALE	unknow	Stage IB	T2	M0	N0
TCGA-44-A4SS	415	0	73	MALE	unknow	Stage IA	T1b	M0	N0
TCGA-55-7914	187	1	71	FEMALE	unknow	Stage IIA	T1b	MX	N1
TCGA-78-7145	826	1	52	FEMALE	unknow	Stage IV	T4	M1	N1
TCGA-55-8092	154	1	75	MALE	unknow	Stage IIB	T3	MX	N0
TCGA-MP-A4TE	896	1	56	MALE	unknow	Stage IIA	T2b	MX	N0
TCGA-MP-A4T4	2617	1	68	FEMALE	unknow	Stage IIB	T2	M0	N1
TCGA-55-8203	547	0	69	FEMALE	unknow	Stage IA	T1b	M0	N0
TCGA-55-6712	171	1	71	MALE	unknow	Stage IIA	T2a	MX	N1
TCGA-49-6743	369	0	81	FEMALE	unknow	Stage IIIA	T1	MX	N2
TCGA-73-4668	467	0	66	FEMALE	unknow	Stage IIB	T2	M0	N1
TCGA-67-3770	610	0	70	FEMALE	unknow	Stage IA	T1	M0	N0
TCGA-64-1680	1126	0	63	MALE	unknow	Stage IV	T2a	M1	N2
TCGA-05-4398	1431	0	47	FEMALE	unknow	Stage IIIB	T4	M0	N3
TCGA-78-7155	1171	1	68	MALE	unknow	Stage IB	T2	M0	N0
TCGA-78-7152	1202	0	65	MALE	unknow	Stage IB	T2	M0	N0
TCGA-75-6211		1	unknow	FEMALE	unknow	Stage IB	T2	M0	N0
TCGA-MP-A4T6	1790	1	76	FEMALE	unknow	Stage IIIA	T1	MX	N2
TCGA-55-A57B	546	0	80	FEMALE	unknow	Stage IA	T1b	M0	N0
TCGA-44-2656	582	0	59	MALE	unknow	Stage IB	T2	M0	N0
TCGA-93-A4JO	33	1	70	MALE	unknow	Stage IA	T1a	MX	N0
TCGA-78-7535	949	1	45	MALE	unknow	Stage IB	T2	M0	N0
TCGA-62-8398	444	1	55	MALE	unknow	Stage IIIA	T2	M0	N2
TCGA-91-6840	372	0	59	FEMALE	unknow	Stage IA	T1b	M0	N0
TCGA-75-5122		1	unknow	MALE	unknow	Stage IB	T2	M0	N0
TCGA-99-8025	1060	0	72	FEMALE	unknow	Stage IIIA	T3	M0	N2
TCGA-55-6969	1239	0	52	MALE	unknow	Stage IB	T2	M0	N0
TCGA-64-5774	2550	0	60	MALE	unknow	Stage IB	T2	M0	N0
TCGA-O1-A52J	1798	1	74	FEMALE	unknow	Stage IA	T1	MX	N0
TCGA-86-6851	179	0	73	FEMALE	unknow	Stage IIA	T1b	M0	N1
TCGA-62-8395	1216	0	80	FEMALE	unknow	Stage IIB	T3	M0	N0
TCGA-86-A4P7	415	0	63	FEMALE	unknow	Stage IB	T2a	M0	N0
TCGA-91-6831	310	0	66	MALE	unknow	Stage IB	T2	MX	N0
TCGA-05-4420	912	0	41	MALE	unknow	Stage IB	T2	M0	N0
TCGA-05-4395	0	1	76	MALE	unknow	Stage IIIB	T4	M0	N2
TCGA-67-6217	422	0	73	FEMALE	unknow	Stage IIA	T2a	M0	N1
TCGA-44-4112	370	0	60	FEMALE	unknow	Stage IB	T2a	M0	N0
TCGA-62-A46O	1454	1	65	FEMALE	unknow	Stage IB	T2	M0	N0
TCGA-44-7660	325	0	72	MALE	unknow	Stage IB	T2	MX	N0
TCGA-44-3919	190	0	71	FEMALE	unknow	Stage IA	T1	M0	N0
TCGA-44-6775	370	0	72	FEMALE	unknow	Stage IB	T2a	MX	N0
TCGA-97-7554	775	0	83	FEMALE	unknow	Stage IIIA	T2a	M0	N2
TCGA-86-6562	376	1	52	MALE	unknow	Stage IIA	T2a	M0	N1
TCGA-55-6642	2449	0	63	MALE	unknow	Stage IB	T2	MX	N0
TCGA-62-A471	1246	0	64	MALE	unknow	Stage IIB	T2b	M0	N1
TCGA-05-5715	62	0	69	FEMALE	unknow	Stage IB	T2a	M0	N0

## Sheet: GEO dataset (GSE68465)
!Sample_geo_accession	!Sample_status	!Sample_submission_date	!Sample_last_update_date	!Sample_type	!Sample_channel_count	!Sample_source_name_ch1	!Sample_organism_ch1	!Sample_characteristics_ch1	!Sample_characteristics_ch1	!Sample_characteristics_ch1	!Sample_characteristics_ch1	!Sample_characteristics_ch1	!Sample_characteristics_ch1	!Sample_characteristics_ch1	!Sample_characteristics_ch1	!Sample_characteristics_ch1	!Sample_characteristics_ch1	!Sample_characteristics_ch1	!Sample_characteristics_ch1	!Sample_characteristics_ch1	!Sample_characteristics_ch1	!Sample_characteristics_ch1	!Sample_characteristics_ch1	!Sample_molecule_ch1	!Sample_extract_protocol_ch1	!Sample_label_ch1	!Sample_label_protocol_ch1	!Sample_taxid_ch1	!Sample_hyb_protocol	!Sample_scan_protocol	!Sample_data_processing	!Sample_platform_id	!Sample_contact_name	!Sample_contact_email	!Sample_contact_phone	!Sample_contact_department	!Sample_contact_institute	!Sample_contact_address	!Sample_contact_city	!Sample_contact_state	!Sample_contact_zip/postal_code	!Sample_contact_country	!Sample_supplementary_file	!Sample_supplementary_file	!Sample_data_row_count
GSM1672281	Public on May 02 2015	May 01 2015	May 02 2015	RNA	1	MI	Homo sapiens	disease_state: Lung Adenocarcinoma	Sex: Female	age: 74	race: White	vital_status: Alive	clinical_treatment_adjuvant_chemo: No	clinical_treatment_adjuvant_rt: No	disease_stage: pN0pT1	first_progression_or_relapse: No	months_to_first_progression: --	mths_to_last_clinical_assessment: 105.57	months_to_last_contact_or_death: 105.6	smoking_history: Smoked in the past	surgical_margins: ALL MARGINS PATHOLOGICALLY NEGATIVE	organism_part: Lung	histologic_grade: Moderate Differentiation	total RNA	See mage-tab files linked to series entry for additional details	biotin	See mage-tab files linked to series entry for additional details	9606	See mage-tab files linked to series entry for additional details	See mage-tab files linked to series entry for additional details	See mage-tab files linked to series entry for additional details	GPL96	Mervi,,Heiskanen	mervi.heiskanen@nih.gov	2402765175	CBIIT	NCI	9609 Medical Center Drive, 1W378	Rockville	MD	20850	USA	ftp://ftp.ncbi.nlm.nih.gov/geo/samples/GSM1672nnn/GSM1672281/suppl/GSM1672281_NCI_Lung_1_U133A.CEL.gz	ftp://ftp.ncbi.nlm.nih.gov/geo/samples/GSM1672nnn/GSM1672281/suppl/GSM1672281_NCI_Lung_1_U133A.mas5.CHP.gz	22283
GSM1672282	Public on May 02 2015	May 01 2015	May 02 2015	RNA	1	MI	Homo sapiens	disease_state: Lung Adenocarcinoma	Sex: Female	age: 74	race: White	vital_status: Alive	clinical_treatment_adjuvant_chemo: No	clinical_treatment_adjuvant_rt: No	disease_stage: pN0pT1	first_progression_or_relapse: No	months_to_first_progression: --	mths_to_last_clinical_assessment: 25.2	months_to_last_contact_or_death: 25.2	smoking_history: Smoked in the past	surgical_margins: ALL MARGINS PATHOLOGICALLY NEGATIVE	organism_part: Lung	histologic_grade: WELL DIFFERENTIATED	total RNA	See mage-tab files linked to series entry for additional details	biotin	See mage-tab files linked to series entry for additional details	9606	See mage-tab files linked to series entry for additional details	See mage-tab files linked to series entry for additional details	See mage-tab files linked to series entry for additional details	GPL96	Mervi,,Heiskanen	mervi.heiskanen@nih.gov	2402765175	CBIIT	NCI	9609 Medical Center Drive, 1W378	Rockville	MD	20850	USA	ftp://ftp.ncbi.nlm.nih.gov/geo/samples/GSM1672nnn/GSM1672282/suppl/GSM1672282_NCI_Lung_3_U133A.CEL.gz	ftp://ftp.ncbi.nlm.nih.gov/geo/samples/GSM1672nnn/GSM1672282/suppl/GSM1672282_NCI_Lung_3_U133A.mas5.CHP.gz	22283
GSM1672283	Public on May 02 2015	May 01 2015	May 02 2015	RNA	1	MI	Homo sapiens	disease_state: Lung Adenocarcinoma	Sex: Female	age: 74	race: White	vital_status: Dead	clinical_treatment_adjuvant_chemo: No	clinical_treatment_adjuvant_rt: No	disease_stage: pN0pT2	first_progression_or_relapse: Yes	months_to_first_progression: --	mths_to_last_clinical_assessment: 64.77	months_to_last_contact_or_death: 64.8	smoking_history: Smoked in the past	surgical_margins: ALL MARGINS PATHOLOGICALLY NEGATIVE	organism_part: Lung	histologic_grade: WELL DIFFERENTIATED	total RNA	See mage-tab files linked to series entry for additional details	biotin	See mage-tab files linked to series entry for additional details	9606	See mage-tab files linked to series entry for additional details	See mage-tab files linked to series entry for additional details	See mage-tab files linked to series entry for additional details	GPL96	Mervi,,Heiskanen	mervi.heiskanen@nih.gov	2402765175	CBIIT	NCI	9609 Medical Center Drive, 1W378	Rockville	MD	20850	USA	ftp://ftp.ncbi.nlm.nih.gov/geo/samples/GSM1672nnn/GSM1672283/suppl/GSM1672283_NCI_Lung_4_U133A.CEL.gz	ftp://ftp.ncbi.nlm.nih.gov/geo/samples/GSM1672nnn/GSM1672283/suppl/GSM1672283_NCI_Lung_4_U133A.mas5.CHP.gz	22283
GSM1672284	Public on May 02 2015	May 01 2015	May 02 2015	RNA	1	MI	Homo sapiens	disease_state: Lung Adenocarcinoma	Sex: Female	age: 82	race: Unknown	vital_status: Alive	clinical_treatment_adjuvant_chemo: No	clinical_treatment_adjuvant_rt: No	disease_stage: pN0pT1	first_progression_or_relapse: No	months_to_first_progression: --	mths_to_last_clinical_assessment: 69.2	months_to_last_contact_or_death: 69.2	smoking_history: Never smoked	surgical_margins: ALL MARGINS PATHOLOGICALLY NEGATIVE	organism_part: Lung	histologic_grade: WELL DIFFERENTIATED	total RNA	See mage-tab files linked to series entry for additional details	biotin	See mage-tab files linked to series entry for additional details	9606	See mage-tab files linked to series entry for additional details	See mage-tab files linked to series entry for additional details	See mage-tab files linked to series entry for additional details	GPL96	Mervi,,Heiskanen	mervi.heiskanen@nih.gov	2402765175	CBIIT	NCI	9609 Medical Center Drive, 1W378	Rockville	MD	20850	USA	ftp://ftp.ncbi.nlm.nih.gov/geo/samples/GSM1672nnn/GSM1672284/suppl/GSM1672284_NCI_Lung_5_U133A.CEL.gz	ftp://ftp.ncbi.nlm.nih.gov/geo/samples/GSM1672nnn/GSM1672284/suppl/GSM1672284_NCI_Lung_5_U133A.mas5.CHP.gz	22283
GSM1672285	Public on May 02 2015	May 01 2015	May 02 2015	RNA	1	MI	Homo sapiens	disease_state: Lung Adenocarcinoma	Sex: Female	age: 59	race: White	vital_status: Dead	clinical_treatment_adjuvant_chemo: No	clinical_treatment_adjuvant_rt: No	disease_stage: pN0pT2	first_progression_or_relapse: Yes	months_to_first_progression: 6.6	mths_to_last_clinical_assessment: 33.87	months_to_last_contact_or_death: 33.9	smoking_history: Never smoked	surgical_margins: ALL MARGINS PATHOLOGICALLY NEGATIVE	organism_part: Lung	histologic_grade: Moderate Differentiation	total RNA	See mage-tab files linked to series entry for additional details	biotin	See mage-tab files linked to series entry for additional details	9606	See mage-tab files linked to series entry for additional details	See mage-tab files linked to series entry for additional details	See mage-tab files linked to series entry for additional details	GPL96	Mervi,,Heiskanen	mervi.heiskanen@nih.gov	2402765175	CBIIT	NCI	9609 Medical Center Drive, 1W378	Rockville	MD	20850	USA	ftp://ftp.ncbi.nlm.nih.gov/geo/samples/GSM1672nnn/GSM1672285/suppl/GSM1672285_NCI_Lung_6_U133A.CEL.gz	ftp://ftp.ncbi.nlm.nih.gov/geo/samples/GSM1672nnn/GSM1672285/suppl/GSM1672285_NCI_Lung_6_U133A.mas5.CHP.gz	22283
GSM1672286	Public on May 02 2015	May 01 2015	May 02 2015	RNA	1	MI	Homo sapiens	disease_state: Lung Adenocarcinoma	Sex: Female	age: 60	race: White	vital_status: Alive	clinical_treatment_adjuvant_chemo: No	clinical_treatment_adjuvant_rt: No	disease_stage: pN0pT1	first_progression_or_relapse: Yes	months_to_first_progression: 42.5	mths_to_last_clinical_assessment: 83	months_to_last_contact_or_death: 83	smoking_history: Smoked in the past	surgical_margins: ALL MARGINS PATHOLOGICALLY NEGATIVE	organism_part: Lung	histologic_grade: WELL DIFFERENTIATED	total RNA	See mage-tab files linked to series entry for additional details	biotin	See mage-tab files linked to series entry for additional details	9606	See mage-tab files linked to series entry for additional details	See mage-tab files linked to series entry for additional details	See mage-tab files linked to series entry for additional details	GPL96	Mervi,,Heiskanen	mervi.heiskanen@nih.gov	2402765175	CBIIT	NCI	9609 Medical Center Drive, 1W378	Rockville	MD	20850	USA	ftp://ftp.ncbi.nlm.nih.gov/geo/samples/GSM1672nnn/GSM1672286/suppl/GSM1672286_NCI_Lung_7_U133A.CEL.gz	ftp://ftp.ncbi.nlm.nih.gov/geo/samples/GSM1672nnn/GSM1672286/suppl/GSM1672286_NCI_Lung_7_U133A.mas5.CHP.gz	22283
GSM1672287	Public on May 02 2015	May 01 2015	May 02 2015	RNA	1	MI	Homo sapiens	disease_state: Lung Adenocarcinoma	Sex: Female	age: 54	race: White	vital_status: Alive	clinical_treatment_adjuvant_chemo: No	clinical_treatment_adjuvant_rt: No	disease_stage: pN0pT1	first_progression_or_relapse: Yes	months_to_first_progression: 30	mths_to_last_clinical_assessment: 69.2	months_to_last_contact_or_death: 69.2	smoking_history: Smoked in the past	surgical_margins: ALL MARGINS PATHOLOGICALLY NEGATIVE	organism_part: Lung	histologic_grade: WELL DIFFERENTIATED	total RNA	See mage-tab files linked to series entry for additional details	biotin	See mage-tab files linked to series entry for additional details	9606	See mage-tab files linked to series entry for additional details	See mage-tab files linked to series entry for additional details	See mage-tab files linked to series entry for additional details	GPL96	Mervi,,Heiskanen	mervi.heiskanen@nih.gov	2402765175	CBIIT	NCI	9609 Medical Center Drive, 1W378	Rockville	MD	20850	USA	ftp://ftp.ncbi.nlm.nih.gov/geo/samples/GSM1672nnn/GSM1672287/suppl/GSM1672287_NCI_Lung_8_U133A.CEL.gz	ftp://ftp.ncbi.nlm.nih.gov/geo/samples/GSM1672nnn/GSM1672287/suppl/GSM1672287_NCI_Lung_8_U133A.mas5.CHP.gz	22283
GSM1672288	Public on May 02 2015	May 01 2015	May 02 2015	RNA	1	MI	Homo sapiens	disease_state: Lung Adenocarcinoma	Sex: Female	age: 63	race: White	vital_status: Alive	clinical_treatment_adjuvant_chemo: No	clinical_treatment_adjuvant_rt: No	disease_stage: pN0pT1	first_progression_or_relapse: Yes	months_to_first_progression: 3	mths_to_last_clinical_assessment: 27.1	months_to_last_contact_or_death: 27.1	smoking_history: Smoked in the past	surgical_margins: ALL MARGINS PATHOLOGICALLY NEGATIVE	organism_part: Lung	histologic_grade: WELL DIFFERENTIATED	total RNA	See mage-tab files linked to series entry for additional details	biotin	See mage-tab files linked to series entry for additional details	9606	See mage-tab files linked to series entry for additional details	See mage-tab files linked to series entry for additional details	See mage-tab files linked to series entry for additional details	GPL96	Mervi,,Heiskanen	mervi.heiskanen@nih.gov	2402765175	CBIIT	NCI	9609 Medical Center Drive, 1W378	Rockville	MD	20850	USA	ftp://ftp.ncbi.nlm.nih.gov/geo/samples/GSM1672nnn/GSM1672288/suppl/GSM1672288_NCI_Lung_10_U133A.CEL.gz	ftp://ftp.ncbi.nlm.nih.gov/geo/samples/GSM1672nnn/GSM1672288/suppl/GSM1672288_NCI_Lung_10_U133A.mas5.CHP.gz	22283
GSM1672289	Public on May 02 2015	May 01 2015	May 02 2015	RNA	1	MI	Homo sapiens	disease_state: Lung Adenocarcinoma	Sex: Female	age: 63	race: White	vital_status: Dead	clinical_treatment_adjuvant_chemo: No	clinical_treatment_adjuvant_rt: No	disease_stage: pN0pT1	first_progression_or_relapse: Yes	months_to_first_progression: 5.67	mths_to_last_clinical_assessment: 5.8	months_to_last_contact_or_death: 5.8	smoking_history: Smoked in the past	surgical_margins: ALL MARGINS PATHOLOGICALLY NEGATIVE	organism_part: Lung	histologic_grade: Moderate Differentiation	total RNA	See mage-tab files linked to series entry for additional details	biotin	See mage-tab files linked to series entry for additional details	9606	See mage-tab files linked to series entry for additional details	See mage-tab files linked to series entry for additional details	See mage-tab files linked to series entry for additional details	GPL96	Mervi,,Heiskanen	mervi.heiskanen@nih.gov	2402765175	CBIIT	NCI	9609 Medical Center Drive, 1W378	Rockville	MD	20850	USA	ftp://ftp.ncbi.nlm.nih.gov/geo/samples/GSM1672nnn/GSM1672289/suppl/GSM1672289_NCI_Lung_11_U133A.CEL.gz	ftp://ftp.ncbi.nlm.nih.gov/geo/samples/GSM1672nnn/GSM1672289/suppl/GSM1672289_NCI_Lung_11_U133A.mas5.CHP.gz	22283
GSM1672290	Public on May 02 2015	May 01 2015	May 02 2015	RNA	1	MI	Homo sapiens	disease_state: Lung Adenocarcinoma	Sex: Male	age: 66	race: White	vital_status: Dead	clinical_treatment_adjuvant_chemo: No	clinical_treatment_adjuvant_rt: No	disease_stage: pN0pT3	first_progression_or_relapse: Unknown	months_to_first_progression: --	mths_to_last_clinical_assessment: 50.2	months_to_last_contact_or_death: 50.2	smoking_history: Smoked in the past	surgical_margins: ALL MARGINS PATHOLOGICALLY NEGATIVE	organism_part: Lung	histologic_grade: Moderate Differentiation	total RNA	See mage-tab files linked to series entry for additional details	biotin	See mage-tab files linked to series entry for additional details	9606	See mage-tab files linked to series entry for additional details	See mage-tab files linked to series entry for additional details	See mage-tab files linked to series entry for additional details	GPL96	Mervi,,Heiskanen	mervi.heiskanen@nih.gov	2402765175	CBIIT	NCI	9609 Medical Center Drive, 1W378	Rockville	MD	20850	USA	ftp://ftp.ncbi.nlm.nih.gov/geo/samples/GSM1672nnn/GSM1672290/suppl/GSM1672290_NCI_Lung_12_U133A.CEL.gz	ftp://ftp.ncbi.nlm.nih.gov/geo/samples/GSM1672nnn/GSM1672290/suppl/GSM1672290_NCI_Lung_12_U133A.mas5.CHP.gz	22283
GSM1672291	Public on May 02 2015	May 01 2015	May 02 2015	RNA	1	MI	Homo sapiens	disease_state: Lung Adenocarcinoma	Sex: Female	age: 52	race: Unknown	vital_status: Alive	clinical_treatment_adjuvant_chemo: No	clinical_treatment_adjuvant_rt: No	disease_stage: pN0pT1	first_progression_or_relapse: Yes	months_to_first_progression: 56.97	mths_to_last_clinical_assessment: 73	months_to_last_contact_or_death: 73	smoking_history: Smoked in the past	surgical_margins: ALL MARGINS PATHOLOGICALLY NEGATIVE	organism_part: Lung	histologic_grade: POORLY DIFFERENTIATED	total RNA	See mage-tab files linked to series entry for additional details	biotin	See mage-tab files linked to series entry for additional details	9606	See mage-tab files linked to series entry for additional details	See mage-tab files linked to series entry for additional details	See mage-tab files linked to series entry for additional details	GPL96	Mervi,,Heiskanen	mervi.heiskanen@nih.gov	2402765175	CBIIT	NCI	9609 Medical Center Drive, 1W378	Rockville	MD	20850	USA	ftp://ftp.ncbi.nlm.nih.gov/geo/samples/GSM1672nnn/GSM1672291/suppl/GSM1672291_NCI_Lung_13_U133A.CEL.gz	ftp://ftp.ncbi.nlm.nih.gov/geo/samples/GSM1672nnn/GSM1672291/suppl/GSM1672291_NCI_Lung_13_U133A.mas5.CHP.gz	22283
GSM1672292	Public on May 02 2015	May 01 2015	May 02 2015	RNA	1	MI	Homo sapiens	disease_state: Lung Adenocarcinoma	Sex: Female	age: 62	race: White	vital_status: Dead	clinical_treatment_adjuvant_chemo: No	clinical_treatment_adjuvant_rt: No	disease_stage: pN0pT1	first_progression_or_relapse: Yes	months_to_first_progression: 25	mths_to_last_clinical_assessment: --	months_to_last_contact_or_death: 34.8	smoking_history: Smoked in the past	surgical_margins: ALL MARGINS PATHOLOGICALLY NEGATIVE	organism_part: Lung	histologic_grade: POORLY DIFFERENTIATED	total RNA	See mage-tab files linked to series entry for additional details	biotin	See mage-tab files linked to series entry for additional details	9606	See mage-tab files linked to series entry for additional details	See mage-tab files linked to series entry for additional details	See mage-tab files linked to series entry for additional details	GPL96	Mervi,,Heiskanen	mervi.heiskanen@nih.gov	2402765175	CBIIT	NCI	9609 Medical Center Drive, 1W378	Rockville	MD	20850	USA	ftp://ftp.ncbi.nlm.nih.gov/geo/samples/GSM1672nnn/GSM1672292/suppl/GSM1672292_NCI_Lung_14_U133A.CEL.gz	ftp://ftp.ncbi.nlm.nih.gov/geo/samples/GSM1672nnn/GSM1672292/suppl/GSM1672292_NCI_Lung_14_U133A.mas5.CHP.gz	22283
GSM1672293	Public on May 02 2015	May 01 2015	May 02 2015	RNA	1	MI	Homo sapiens	disease_state: Lung Adenocarcinoma	Sex: Male	age: 60	race: White	vital_status: Dead	clinical_treatment_adjuvant_chemo: No	clinical_treatment_adjuvant_rt: No	disease_stage: pN0pT1	first_progression_or_relapse: Unknown	months_to_first_progression: --	mths_to_last_clinical_assessment: 27.6	months_to_last_contact_or_death: 27.6	smoking_history: Smoked in the past	surgical_margins: ALL MARGINS PATHOLOGICALLY NEGATIVE	organism_part: Lung	histologic_grade: Moderate Differentiation	total RNA	See mage-tab files linked to series entry for additional details	biotin	See mage-tab files linked to series entry for additional details	9606	See mage-tab files linked to series entry for additional details	See mage-tab files linked to series entry for additional details	See mage-tab files linked to series entry for additional details	GPL96	Mervi,,Heiskanen	mervi.heiskanen@nih.gov	2402765175	CBIIT	NCI	9609 Medical Center Drive, 1W378	Rockville	MD	20850	USA	ftp://ftp.ncbi.nlm.nih.gov/geo/samples/GSM1672nnn/GSM1672293/suppl/GSM1672293_NCI_Lung_15_U133A.CEL.gz	ftp://ftp.ncbi.nlm.nih.gov/geo/samples/GSM1672nnn/GSM1672293/suppl/GSM1672293_NCI_Lung_15_U133A.mas5.CHP.gz	22283
GSM1672294	Public on May 02 2015	May 01 2015	May 02 2015	RNA	1	MI	Homo sapiens	disease_state: Lung Adenocarcinoma	Sex: Female	age: 66	race: White	vital_status: Dead	clinical_treatment_adjuvant_chemo: No	clinical_treatment_adjuvant_rt: No	disease_stage: pN0pT2	first_progression_or_relapse: Yes	months_to_first_progression: 36	mths_to_last_clinical_assessment: 48.77	months_to_last_contact_or_death: 48.8	smoking_history: Smoked in the past	surgical_margins: ALL MARGINS PATHOLOGICALLY NEGATIVE	organism_part: Lung	histologic_grade: POORLY DIFFERENTIATED	total RNA	See mage-tab files linked to series entry for additional details	biotin	See mage-tab files linked to series entry for additional details	9606	See mage-tab files linked to series entry for additional details	See mage-tab files linked to series entry for additional details	See mage-tab files linked to series entry for additional details	GPL96	Mervi,,Heiskanen	mervi.heiskanen@nih.gov	2402765175	CBIIT	NCI	9609 Medical Center Drive, 1W378	Rockville	MD	20850	USA	ftp://ftp.ncbi.nlm.nih.gov/geo/samples/GSM1672nnn/GSM1672294/suppl/GSM1672294_NCI_Lung_16_U133A.CEL.gz	ftp://ftp.ncbi.nlm.nih.gov/geo/samples/GSM1672nnn/GSM1672294/suppl/GSM1672294_NCI_Lung_16_U133A.mas5.CHP.gz	22283
GSM1672295	Public on May 02 2015	May 01 2015	May 02 2015	RNA	1	MI	Homo sapiens	disease_state: Lung Adenocarcinoma	Sex: Female	age: 61	race: Asian	vital_status: Alive	clinical_treatment_adjuvant_chemo: Yes	clinical_treatment_adjuvant_rt: Yes	disease_stage: pN0pT2	first_progression_or_relapse: Yes	months_to_first_progression: 9	mths_to_last_clinical_assessment: 66.6	months_to_last_contact_or_death: 66.6	smoking_history: Never smoked	surgical_margins: ALL MARGINS PATHOLOGICALLY NEGATIVE	organism_part: Lung	histologic_grade: Moderate Differentiation	total RNA	See mage-tab files linked to series entry for additional details	biotin	See mage-tab files linked to series entry for additional details	9606	See mage-tab files linked to series entry for additional details	See mage-tab files linked to series entry for additional details	See mage-tab files linked to series entry for additional details	GPL96	Mervi,,Heiskanen	mervi.heiskanen@nih.gov	2402765175	CBIIT	NCI	9609 Medical Center Drive, 1W378	Rockville	MD	20850	USA	ftp://ftp.ncbi.nlm.nih.gov/geo/samples/GSM1672nnn/GSM1672295/suppl/GSM1672295_NCI_Lung_17_U133A.CEL.gz	ftp://ftp.ncbi.nlm.nih.gov/geo/samples/GSM1672nnn/GSM1672295/suppl/GSM1672295_NCI_Lung_17_U133A.mas5.CHP.gz	22283
GSM1672296	Public on May 02 2015	May 01 2015	May 02 2015	RNA	1	MI	Homo sapiens	disease_state: Lung Adenocarcinoma	Sex: Female	age: 68	race: White	vital_status: Dead	clinical_treatment_adjuvant_chemo: No	clinical_treatment_adjuvant_rt: No	disease_stage: pN0pT2	first_progression_or_relapse: Yes	months_to_first_progression: 5.3	mths_to_last_clinical_assessment: 9	months_to_last_contact_or_death: 10.1	smoking_history: Smoked in the past	surgical_margins: ALL MARGINS PATHOLOGICALLY NEGATIVE	organism_part: Lung	histologic_grade: Moderate Differentiation	total RNA	See mage-tab files linked to series entry for additional details	biotin	See mage-tab files linked to series entry for additional details	9606	See mage-tab files linked to series entry for additional details	See mage-tab files linked to series entry for additional details	See mage-tab files linked to series entry for additional details	GPL96	Mervi,,Heiskanen	mervi.heiskanen@nih.gov	2402765175	CBIIT	NCI	9609 Medical Center Drive, 1W378	Rockville	MD	20850	USA	ftp://ftp.ncbi.nlm.nih.gov/geo/samples/GSM1672nnn/GSM1672296/suppl/GSM1672296_NCI_Lung_18_U133A.CEL.gz	ftp://ftp.ncbi.nlm.nih.gov/geo/samples/GSM1672nnn/GSM1672296/suppl/GSM1672296_NCI_Lung_18_U133A.mas5.CHP.gz	22283
GSM1672297	Public on May 02 2015	May 01 2015	May 02 2015	RNA	1	MI	Homo sapiens	disease_state: Lung Adenocarcinoma	Sex: Female	age: 48	race: White	vital_status: Dead	clinical_treatment_adjuvant_chemo: Yes	clinical_treatment_adjuvant_rt: Yes	disease_stage: pN0pT2	first_progression_or_relapse: Yes	months_to_first_progression: 1	mths_to_last_clinical_assessment: --	months_to_last_contact_or_death: 8.7	smoking_history: Smoked in the past	surgical_margins: ALL MARGINS PATHOLOGICALLY NEGATIVE	organism_part: Lung	histologic_grade: POORLY DIFFERENTIATED	total RNA	See mage-tab files linked to series entry for additional details	biotin	See mage-tab files linked to series entry for additional details	9606	See mage-tab files linked to series entry for additional details	See mage-tab files linked to series entry for additional details	See mage-tab files linked to series entry for additional details	GPL96	Mervi,,Heiskanen	mervi.heiskanen@nih.gov	2402765175	CBIIT	NCI	9609 Medical Center Drive, 1W378	Rockville	MD	20850	USA	ftp://ftp.ncbi.nlm.nih.gov/geo/samples/GSM1672nnn/GSM1672297/suppl/GSM1672297_NCI_Lung_19_U133A.CEL.gz	ftp://ftp.ncbi.nlm.nih.gov/geo/samples/GSM1672nnn/GSM1672297/suppl/GSM1672297_NCI_Lung_19_U133A.mas5.CHP.gz	22283
GSM1672298	Public on May 02 2015	May 01 2015	May 02 2015	RNA	1	MI	Homo sapiens	disease_state: Lung Adenocarcinoma	Sex: Female	age: 75	race: White	vital_status: Dead	clinical_treatment_adjuvant_chemo: No	clinical_treatment_adjuvant_rt: No	disease_stage: pN0pT1	first_progression_or_relapse: Yes	months_to_first_progression: 43	mths_to_last_clinical_assessment: 61.17	months_to_last_contact_or_death: 61.2	smoking_history: Smoked in the past	surgical_margins: ALL MARGINS PATHOLOGICALLY NEGATIVE	organism_part: Lung	histologic_grade: Moderate Differentiation	total RNA	See mage-tab files linked to series entry for additional details	biotin	See mage-tab files linked to series entry for additional details	9606	See mage-tab files linked to series entry for additional details	See mage-tab files linked to series entry for additional details	See mage-tab files linked to series entry for additional details	GPL96	Mervi,,Heiskanen	mervi.heiskanen@nih.gov	2402765175	CBIIT	NCI	9609 Medical Center Drive, 1W378	Rockville	MD	20850	USA	ftp://ftp.ncbi.nlm.nih.gov/geo/samples/GSM1672nnn/GSM1672298/suppl/GSM1672298_NCI_Lung_20_U133A.CEL.gz	ftp://ftp.ncbi.nlm.nih.gov/geo/samples/GSM1672nnn/GSM1672298/suppl/GSM1672298_NCI_Lung_20_U133A.mas5.CHP.gz	22283
GSM1672299	Public on May 02 2015	May 01 2015	May 02 2015	RNA	1	MI	Homo sapiens	disease_state: Lung Adenocarcinoma	Sex: Female	age: 50	race: White	vital_status: Alive	clinical_treatment_adjuvant_chemo: No	clinical_treatment_adjuvant_rt: No	disease_stage: pN0pT2	first_progression_or_relapse: No	months_to_first_progression: --	mths_to_last_clinical_assessment: 132.2	months_to_last_contact_or_death: 132.2	smoking_history: Smoked in the past	surgical_margins: ALL MARGINS PATHOLOGICALLY NEGATIVE	organism_part: Lung	histologic_grade: POORLY DIFFERENTIATED	total RNA	See mage-tab files linked to series entry for additional details	biotin	See mage-tab files linked to series entry for additional details	9606	See mage-tab files linked to series entry for additional details	See mage-tab files linked to series entry for additional details	See mage-tab files linked to series entry for additional details	GPL96	Mervi,,Heiskanen	mervi.heiskanen@nih.gov	2402765175	CBIIT	NCI	9609 Medical Center Drive, 1W378	Rockville	MD	20850	USA	ftp://ftp.ncbi.nlm.nih.gov/geo/samples/GSM1672nnn/GSM1672299/suppl/GSM1672299_NCI_Lung_21_U133A.CEL.gz	ftp://ftp.ncbi.nlm.nih.gov/geo/samples/GSM1672nnn/GSM1672299/suppl/GSM1672299_NCI_Lung_21_U133A.mas5.CHP.gz	22283
GSM1672300	Public on May 02 2015	May 01 2015	May 02 2015	RNA	1	MI	Homo sapiens	disease_state: Lung Adenocarcinoma	Sex: Female	age: 75	race: White	vital_status: Dead	clinical_treatment_adjuvant_chemo: No	clinical_treatment_adjuvant_rt: No	disease_stage: pN0pT1	first_progression_or_relapse: Yes	months_to_first_progression: --	mths_to_last_clinical_assessment: 128.8	months_to_last_contact_or_death: 128.8	smoking_history: Smoked in the past	surgical_margins: ALL MARGINS PATHOLOGICALLY NEGATIVE	organism_part: Lung	histologic_grade: Moderate Differentiation	total RNA	See mage-tab files linked to series entry for additional details	biotin	See mage-tab files linked to series entry for additional details	9606	See mage-tab files linked to series entry for additional details	See mage-tab files linked to series entry for additional details	See mage-tab files linked to series entry for additional details	GPL96	Mervi,,Heiskanen	mervi.heiskanen@nih.gov	2402765175	CBIIT	NCI	9609 Medical Center Drive, 1W378	Rockville	MD	20850	USA	ftp://ftp.ncbi.nlm.nih.gov/geo/samples/GSM1672nnn/GSM1672300/suppl/GSM1672300_NCI_Lung_22_U133A.CEL.gz	ftp://ftp.ncbi.nlm.nih.gov/geo/samples/GSM1672nnn/GSM1672300/suppl/GSM1672300_NCI_Lung_22_U133A.mas5.CHP.gz	22283
GSM1672301	Public on May 02 2015	May 01 2015	May 02 2015	RNA	1	MI	Homo sapiens	disease_state: Lung Adenocarcinoma	Sex: Female	age: 72	race: White	vital_status: Dead	clinical_treatment_adjuvant_chemo: No	clinical_treatment_adjuvant_rt: No	disease_stage: pN0pT2	first_progression_or_relapse: Yes	months_to_first_progression: --	mths_to_last_clinical_assessment: 42.8	months_to_last_contact_or_death: 43.8	smoking_history: Smoked in the past	surgical_margins: ALL MARGINS PATHOLOGICALLY NEGATIVE	organism_part: Lung	histologic_grade: WELL DIFFERENTIATED	total RNA	See mage-tab files linked to series entry for additional details	biotin	See mage-tab files linked to series entry for additional details	9606	See mage-tab files linked to series entry for additional details	See mage-tab files linked to series entry for additional details	See mage-tab files linked to series entry for additional details	GPL96	Mervi,,Heiskanen	mervi.heiskanen@nih.gov	2402765175	CBIIT	NCI	9609 Medical Center Drive, 1W378	Rockville	MD	20850	USA	ftp://ftp.ncbi.nlm.nih.gov/geo/samples/GSM1672nnn/GSM1672301/suppl/GSM1672301_NCI_Lung_23_U133A.CEL.gz	ftp://ftp.ncbi.nlm.nih.gov/geo/samples/GSM1672nnn/GSM1672301/suppl/GSM1672301_NCI_Lung_23_U133A.mas5.CHP.gz	22283
GSM1672302	Public on May 02 2015	May 01 2015	May 02 2015	RNA	1	MI	Homo sapiens	disease_state: Lung Adenocarcinoma	Sex: Female	age: 72	race: White	vital_status: Dead	clinical_treatment_adjuvant_chemo: No	clinical_treatment_adjuvant_rt: No	disease_stage: pN2pT2	first_progression_or_relapse: No	months_to_first_progression: --	mths_to_last_clinical_assessment: 5.9	months_to_last_contact_or_death: 5.9	smoking_history: Smoked in the past	surgical_margins: ALL MARGINS PATHOLOGICALLY NEGATIVE	organism_part: Lung	histologic_grade: POORLY DIFFERENTIATED	total RNA	See mage-tab files linked to series entry for additional details	biotin	See mage-tab files linked to series entry for additional details	9606	See mage-tab files linked to series entry for additional details	See mage-tab files linked to series entry for additional details	See mage-tab files linked to series entry for additional details	GPL96	Mervi,,Heiskanen	mervi.heiskanen@nih.gov	2402765175	CBIIT	NCI	9609 Medical Center Drive, 1W378	Rockville	MD	20850	USA	ftp://ftp.ncbi.nlm.nih.gov/geo/samples/GSM1672nnn/GSM1672302/suppl/GSM1672302_NCI_Lung_25_U133A.CEL.gz	ftp://ftp.ncbi.nlm.nih.gov/geo/samples/GSM1672nnn/GSM1672302/suppl/GSM1672302_NCI_Lung_25_U133A.mas5.CHP.gz	22283
GSM1672303	Public on May 02 2015	May 01 2015	May 02 2015	RNA	1	MI	Homo sapiens	disease_state: Lung Adenocarcinoma	Sex: Male	age: 71	race: White	vital_status: Dead	clinical_treatment_adjuvant_chemo: No	clinical_treatment_adjuvant_rt: No	disease_stage: pN2pT3	first_progression_or_relapse: Unknown	months_to_first_progression: --	mths_to_last_clinical_assessment: 1.4	months_to_last_contact_or_death: 2.4	smoking_history: Smoked in the past	surgical_margins: ALL MARGINS PATHOLOGICALLY NEGATIVE	organism_part: Lung	histologic_grade: Moderate Differentiation	total RNA	See mage-tab files linked to series entry for additional details	biotin	See mage-tab files linked to series entry for additional details	9606	See mage-tab files linked to series entry for additional details	See mage-tab files linked to series entry for additional details	See mage-tab files linked to series entry for additional details	GPL96	Mervi,,Heiskanen	mervi.heiskanen@nih.gov	2402765175	CBIIT	NCI	9609 Medical Center Drive, 1W378	Rockville	MD	20850	USA	ftp://ftp.ncbi.nlm.nih.gov/geo/samples/GSM1672nnn/GSM1672303/suppl/GSM1672303_NCI_Lung_26_U133A.CEL.gz	ftp://ftp.ncbi.nlm.nih.gov/geo/samples/GSM1672nnn/GSM1672303/suppl/GSM1672303_NCI_Lung_26_U133A.mas5.CHP.gz	22283
GSM1672304	Public on May 02 2015	May 01 2015	May 02 2015	RNA	1	MI	Homo sapiens	disease_state: Lung Adenocarcinoma	Sex: Male	age: 58	race: White	vital_status: Dead	clinical_treatment_adjuvant_chemo: Yes	clinical_treatment_adjuvant_rt: Yes	disease_stage: pN2pT2	first_progression_or_relapse: Yes	months_to_first_progression: 9	mths_to_last_clinical_assessment: 15.6	months_to_last_contact_or_death: 17.6	smoking_history: Smoked in the past	surgical_margins: ALL MARGINS PATHOLOGICALLY NEGATIVE	organism_part: Lung	histologic_grade: POORLY DIFFERENTIATED	total RNA	See mage-tab files linked to series entry for additional details	biotin	See mage-tab files linked to series entry for additional details	9606	See mage-tab files linked to series entry for additional details	See mage-tab files linked to series entry for additional details	See mage-tab files linked to series entry for additional details	GPL96	Mervi,,Heiskanen	mervi.heiskanen@nih.gov	2402765175	CBIIT	NCI	9609 Medical Center Drive, 1W378	Rockville	MD	20850	USA	ftp://ftp.ncbi.nlm.nih.gov/geo/samples/GSM1672nnn/GSM1672304/suppl/GSM1672304_NCI_Lung_27_U133A.CEL.gz	ftp://ftp.ncbi.nlm.nih.gov/geo/samples/GSM1672nnn/GSM1672304/suppl/GSM1672304_NCI_Lung_27_U133A.mas5.CHP.gz	22283
GSM1672305	Public on May 02 2015	May 01 2015	May 02 2015	RNA	1	MI	Homo sapiens	disease_state: Lung Adenocarcinoma	Sex: Male	age: 63	race: Unknown	vital_status: Dead	clinical_treatment_adjuvant_chemo: Yes	clinical_treatment_adjuvant_rt: Yes	disease_stage: pN2pT1	first_progression_or_relapse: Yes	months_to_first_progression: 4	mths_to_last_clinical_assessment: 16.3	months_to_last_contact_or_death: 16.3	smoking_history: Smoked in the past	surgical_margins: ALL MARGINS PATHOLOGICALLY NEGATIVE	organism_part: Lung	histologic_grade: Moderate Differentiation	total RNA	See mage-tab files linked to series entry for additional details	biotin	See mage-tab files linked to series entry for additional details	9606	See mage-tab files linked to series entry for additional details	See mage-tab files linked to series entry for additional details	See mage-tab files linked to series entry for additional details	GPL96	Mervi,,Heiskanen	mervi.heiskanen@nih.gov	2402765175	CBIIT	NCI	9609 Medical Center Drive, 1W378	Rockville	MD	20850	USA	ftp://ftp.ncbi.nlm.nih.gov/geo/samples/GSM1672nnn/GSM1672305/suppl/GSM1672305_NCI_Lung_28_U133A.CEL.gz	ftp://ftp.ncbi.nlm.nih.gov/geo/samples/GSM1672nnn/GSM1672305/suppl/GSM1672305_NCI_Lung_28_U133A.mas5.CHP.gz	22283
GSM1672306	Public on May 02 2015	May 01 2015	May 02 2015	RNA	1	MI	Homo sapiens	disease_state: Lung Adenocarcinoma	Sex: Female	age: 74	race: White	vital_status: Dead	clinical_treatment_adjuvant_chemo: Yes	clinical_treatment_adjuvant_rt: Yes	disease_stage: pN2pT1	first_progression_or_relapse: Yes	months_to_first_progression: 24	mths_to_last_clinical_assessment: 27.6	months_to_last_contact_or_death: 29.6	smoking_history: Smoked in the past	surgical_margins: ALL MARGINS PATHOLOGICALLY NEGATIVE	organism_part: Lung	histologic_grade: POORLY DIFFERENTIATED	total RNA	See mage-tab files linked to series entry for additional details	biotin	See mage-tab files linked to series entry for additional details	9606	See mage-tab files linked to series entry for additional details	See mage-tab files linked to series entry for additional details	See mage-tab files linked to series entry for additional details	GPL96	Mervi,,Heiskanen	mervi.heiskanen@nih.gov	2402765175	CBIIT	NCI	9609 Medical Center Drive, 1W378	Rockville	MD	20850	USA	ftp://ftp.ncbi.nlm.nih.gov/geo/samples/GSM1672nnn/GSM1672306/suppl/GSM1672306_NCI_Lung_29_U133A.CEL.gz	ftp://ftp.ncbi.nlm.nih.gov/geo/samples/GSM1672nnn/GSM1672306/suppl/GSM1672306_NCI_Lung_29_U133A.mas5.CHP.gz	22283
GSM1672307	Public on May 02 2015	May 01 2015	May 02 2015	RNA	1	MI	Homo sapiens	disease_state: Lung Adenocarcinoma	Sex: Male	age: 76	race: White	vital_status: Dead	clinical_treatment_adjuvant_chemo: No	clinical_treatment_adjuvant_rt: No	disease_stage: pN0pT2	first_progression_or_relapse: Yes	months_to_first_progression: --	mths_to_last_clinical_assessment: 81.17	months_to_last_contact_or_death: 81.2	smoking_history: Smoked in the past	surgical_margins: ALL MARGINS PATHOLOGICALLY NEGATIVE	organism_part: Lung	histologic_grade: POORLY DIFFERENTIATED	total RNA	See mage-tab files linked to series entry for additional details	biotin	See mage-tab files linked to series entry for additional details	9606	See mage-tab files linked to series entry for additional details	See mage-tab files linked to series entry for additional details	See mage-tab files linked to series entry for additional details	GPL96	Mervi,,Heiskanen	mervi.heiskanen@nih.gov	2402765175	CBIIT	NCI	9609 Medical Center Drive, 1W378	Rockville	MD	20850	USA	ftp://ftp.ncbi.nlm.nih.gov/geo/samples/GSM1672nnn/GSM1672307/suppl/GSM1672307_NCI_Lung_30_U133A.CEL.gz	ftp://ftp.ncbi.nlm.nih.gov/geo/samples/GSM1672nnn/GSM1672307/suppl/GSM1672307_NCI_Lung_30_U133A.mas5.CHP.gz	22283
GSM1672308	Public on May 02 2015	May 01 2015	May 02 2015	RNA	1	MI	Homo sapiens	disease_state: Lung Adenocarcinoma	Sex: Male	age: 59	race: White	vital_status: Dead	clinical_treatment_adjuvant_chemo: No	clinical_treatment_adjuvant_rt: No	disease_stage: pN0pT1	first_progression_or_relapse: No	months_to_first_progression: --	mths_to_last_clinical_assessment: 59	months_to_last_contact_or_death: 59	smoking_history: Smoked in the past	surgical_margins: ALL MARGINS PATHOLOGICALLY NEGATIVE	organism_part: Lung	histologic_grade: Moderate Differentiation	total RNA	See mage-tab files linked to series entry for additional details	biotin	See mage-tab files linked to series entry for additional details	9606	See mage-tab files linked to series entry for additional details	See mage-tab files linked to series entry for additional details	See mage-tab files linked to series entry for additional details	GPL96	Mervi,,Heiskanen	mervi.heiskanen@nih.gov	2402765175	CBIIT	NCI	9609 Medical Center Drive, 1W378	Rockville	MD	20850	USA	ftp://ftp.ncbi.nlm.nih.gov/geo/samples/GSM1672nnn/GSM1672308/suppl/GSM1672308_NCI_Lung31_U133A.CEL.gz	ftp://ftp.ncbi.nlm.nih.gov/geo/samples/GSM1672nnn/GSM1672308/suppl/GSM1672308_NCI_Lung31_U133A.mas5.CHP.gz	22283
GSM1672309	Public on May 02 2015	May 01 2015	May 02 2015	RNA	1	MI	Homo sapiens	disease_state: Lung Adenocarcinoma	Sex: Male	age: 71	race: White	vital_status: Dead	clinical_treatment_adjuvant_chemo: No	clinical_treatment_adjuvant_rt: No	disease_stage: pN2pT2	first_progression_or_relapse: No	months_to_first_progression: --	mths_to_last_clinical_assessment: 92.6	months_to_last_contact_or_death: 92.6	smoking_history: Smoked in the past	surgical_margins: ALL MARGINS PATHOLOGICALLY NEGATIVE	organism_part: Lung	histologic_grade: Moderate Differentiation	total RNA	See mage-tab files linked to series entry for additional details	biotin	See mage-tab files linked to series entry for additional details	9606	See mage-tab files linked to series entry for additional details	See mage-tab files linked to series entry for additional details	See mage-tab files linked to series entry for additional details	GPL96	Mervi,,Heiskanen	mervi.heiskanen@nih.gov	2402765175	CBIIT	NCI	9609 Medical Center Drive, 1W378	Rockville	MD	20850	USA	ftp://ftp.ncbi.nlm.nih.gov/geo/samples/GSM1672nnn/GSM1672309/suppl/GSM1672309_NCI_Lung32_U133A.CEL.gz	ftp://ftp.ncbi.nlm.nih.gov/geo/samples/GSM1672nnn/GSM1672309/suppl/GSM1672309_NCI_Lung32_U133A.mas5.CHP.gz	22283
GSM1672310	Public on May 02 2015	May 01 2015	May 02 2015	RNA	1	MI	Homo sapiens	disease_state: Lung Adenocarcinoma	Sex: Female	age: 45	race: White	vital_status: Dead	clinical_treatment_adjuvant_chemo: No	clinical_treatment_adjuvant_rt: No	disease_stage: pN0pT3	first_progression_or_relapse: Yes	months_to_first_progression: 3	mths_to_last_clinical_assessment: 3.97	months_to_last_contact_or_death: 4	smoking_history: Smoked in the past	surgical_margins: ALL MARGINS PATHOLOGICALLY NEGATIVE	organism_part: Lung	histologic_grade: POORLY DIFFERENTIATED	total RNA	See mage-tab files linked to series entry for additional details	biotin	See mage-tab files linked to series entry for additional details	9606	See mage-tab files linked to series entry for additional details	See mage-tab files linked to series entry for additional details	See mage-tab files linked to series entry for additional details	GPL96	Mervi,,Heiskanen	mervi.heiskanen@nih.gov	2402765175	CBIIT	NCI	9609 Medical Center Drive, 1W378	Rockville	MD	20850	USA	ftp://ftp.ncbi.nlm.nih.gov/geo/samples/GSM1672nnn/GSM1672310/suppl/GSM1672310_NCI_Lung33_U133A.CEL.gz	ftp://ftp.ncbi.nlm.nih.gov/geo/samples/GSM1672nnn/GSM1672310/suppl/GSM1672310_NCI_Lung33_U133A.mas5.CHP.gz	22283
GSM1672311	Public on May 02 2015	May 01 2015	May 02 2015	RNA	1	MI	Homo sapiens	disease_state: Lung Adenocarcinoma	Sex: Female	age: 78	race: White	vital_status: Dead	clinical_treatment_adjuvant_chemo: Yes	clinical_treatment_adjuvant_rt: Yes	disease_stage: pN2pT1	first_progression_or_relapse: No	months_to_first_progression: --	mths_to_last_clinical_assessment: 16.77	months_to_last_contact_or_death: 16.8	smoking_history: Smoked in the past	surgical_margins: ALL MARGINS PATHOLOGICALLY NEGATIVE	organism_part: Lung	histologic_grade: POORLY DIFFERENTIATED	total RNA	See mage-tab files linked to series entry for additional details	biotin	See mage-tab files linked to series entry for additional details	9606	See mage-tab files linked to series entry for additional details	See mage-tab files linked to series entry for additional details	See mage-tab files linked to series entry for additional details	GPL96	Mervi,,Heiskanen	mervi.heiskanen@nih.gov	2402765175	CBIIT	NCI	9609 Medical Center Drive, 1W378	Rockville	MD	20850	USA	ftp://ftp.ncbi.nlm.nih.gov/geo/samples/GSM1672nnn/GSM1672311/suppl/GSM1672311_NCI_Lung34_U133A.CEL.gz	ftp://ftp.ncbi.nlm.nih.gov/geo/samples/GSM1672nnn/GSM1672311/suppl/GSM1672311_NCI_Lung34_U133A.mas5.CHP.gz	22283
GSM1672312	Public on May 02 2015	May 01 2015	May 02 2015	RNA	1	MI	Homo sapiens	disease_state: Lung Adenocarcinoma	Sex: Male	age: 75	race: White	vital_status: Alive	clinical_treatment_adjuvant_chemo: No	clinical_treatment_adjuvant_rt: No	disease_stage: pN0pT2	first_progression_or_relapse: No	months_to_first_progression: --	mths_to_last_clinical_assessment: 62	months_to_last_contact_or_death: 62	smoking_history: Smoked in the past	surgical_margins: ALL MARGINS PATHOLOGICALLY NEGATIVE	organism_part: Lung	histologic_grade: Moderate Differentiation	total RNA	See mage-tab files linked to series entry for additional details	biotin	See mage-tab files linked to series entry for additional details	9606	See mage-tab files linked to series entry for additional details	See mage-tab files linked to series entry for additional details	See mage-tab files linked to series entry for additional details	GPL96	Mervi,,Heiskanen	mervi.heiskanen@nih.gov	2402765175	CBIIT	NCI	9609 Medical Center Drive, 1W378	Rockville	MD	20850	USA	ftp://ftp.ncbi.nlm.nih.gov/geo/samples/GSM1672nnn/GSM1672312/suppl/GSM1672312_NCI_Lung35_U133A.CEL.gz	ftp://ftp.ncbi.nlm.nih.gov/geo/samples/GSM1672nnn/GSM1672312/suppl/GSM1672312_NCI_Lung35_U133A.mas5.CHP.gz	22283
GSM1672313	Public on May 02 2015	May 01 2015	May 02 2015	RNA	1	MI	Homo sapiens	disease_state: Lung Adenocarcinoma	Sex: Male	age: 61	race: White	vital_status: Dead	clinical_treatment_adjuvant_chemo: Yes	clinical_treatment_adjuvant_rt: Yes	disease_stage: pN0pT2	first_progression_or_relapse: No	months_to_first_progression: --	mths_to_last_clinical_assessment: 62.3	months_to_last_contact_or_death: 62.3	smoking_history: Smoked in the past	surgical_margins: ALL MARGINS PATHOLOGICALLY NEGATIVE	organism_part: Lung	histologic_grade: POORLY DIFFERENTIATED	total RNA	See mage-tab files linked to series entry for additional details	biotin	See mage-tab files linked to series entry for additional details	9606	See mage-tab files linked to series entry for additional details	See mage-tab files linked to series entry for additional details	See mage-tab files linked to series entry for additional details	GPL96	Mervi,,Heiskanen	mervi.heiskanen@nih.gov	2402765175	CBIIT	NCI	9609 Medical Center Drive, 1W378	Rockville	MD	20850	USA	ftp://ftp.ncbi.nlm.nih.gov/geo/samples/GSM1672nnn/GSM1672313/suppl/GSM1672313_NCI_Lung36_U133A.CEL.gz	ftp://ftp.ncbi.nlm.nih.gov/geo/samples/GSM1672nnn/GSM1672313/suppl/GSM1672313_NCI_Lung36_U133A.mas5.CHP.gz	22283
GSM1672314	Public on May 02 2015	May 01 2015	May 02 2015	RNA	1	MI	Homo sapiens	disease_state: Lung Adenocarcinoma	Sex: Male	age: 65	race: White	vital_status: Alive	clinical_treatment_adjuvant_chemo: No	clinical_treatment_adjuvant_rt: No	disease_stage: pN0pT1	first_progression_or_relapse: No	months_to_first_progression: --	mths_to_last_clinical_assessment: 71.8	months_to_last_contact_or_death: 71.8	smoking_history: Smoked in the past	surgical_margins: ALL MARGINS PATHOLOGICALLY NEGATIVE	organism_part: Lung	histologic_grade: POORLY DIFFERENTIATED	total RNA	See mage-tab files linked to series entry for additional details	biotin	See mage-tab files linked to series entry for additional details	9606	See mage-tab files linked to series entry for additional details	See mage-tab files linked to series entry for additional details	See mage-tab files linked to series entry for additional details	GPL96	Mervi,,Heiskanen	mervi.heiskanen@nih.gov	2402765175	CBIIT	NCI	9609 Medical Center Drive, 1W378	Rockville	MD	20850	USA	ftp://ftp.ncbi.nlm.nih.gov/geo/samples/GSM1672nnn/GSM1672314/suppl/GSM1672314_NCI_Lung37_U133A.CEL.gz	ftp://ftp.ncbi.nlm.nih.gov/geo/samples/GSM1672nnn/GSM1672314/suppl/GSM1672314_NCI_Lung37_U133A.mas5.CHP.gz	22283
GSM1672315	Public on May 02 2015	May 01 2015	May 02 2015	RNA	1	MI	Homo sapiens	disease_state: Lung Adenocarcinoma	Sex: Male	age: 69	race: Black or African American	vital_status: Alive	clinical_treatment_adjuvant_chemo: No	clinical_treatment_adjuvant_rt: No	disease_stage: pN0pT1	first_progression_or_relapse: No	months_to_first_progression: --	mths_to_last_clinical_assessment: 84	months_to_last_contact_or_death: 84	smoking_history: Smoked in the past	surgical_margins: ALL MARGINS PATHOLOGICALLY NEGATIVE	organism_part: Lung	histologic_grade: POORLY DIFFERENTIATED	total RNA	See mage-tab files linked to series entry for additional details	biotin	See mage-tab files linked to series entry for additional details	9606	See mage-tab files linked to series entry for additional details	See mage-tab files linked to series entry for additional details	See mage-tab files linked to series entry for additional details	GPL96	Mervi,,Heiskanen	mervi.heiskanen@nih.gov	2402765175	CBIIT	NCI	9609 Medical Center Drive, 1W378	Rockville	MD	20850	USA	ftp://ftp.ncbi.nlm.nih.gov/geo/samples/GSM1672nnn/GSM1672315/suppl/GSM1672315_NCI_Lung38_U133A.CEL.gz	ftp://ftp.ncbi.nlm.nih.gov/geo/samples/GSM1672nnn/GSM1672315/suppl/GSM1672315_NCI_Lung38_U133A.mas5.CHP.gz	22283
GSM1672316	Public on May 02 2015	May 01 2015	May 02 2015	RNA	1	MI	Homo sapiens	disease_state: Lung Adenocarcinoma	Sex: Male	age: 73	race: White	vital_status: Dead	clinical_treatment_adjuvant_chemo: No	clinical_treatment_adjuvant_rt: No	disease_stage: pN0pT2	first_progression_or_relapse: No	months_to_first_progression: --	mths_to_last_clinical_assessment: 18.6	months_to_last_contact_or_death: 18.6	smoking_history: Smoked in the past	surgical_margins: ALL MARGINS PATHOLOGICALLY NEGATIVE	organism_part: Lung	histologic_grade: WELL DIFFERENTIATED	total RNA	See mage-tab files linked to series entry for additional details	biotin	See mage-tab files linked to series entry for additional details	9606	See mage-tab files linked to series entry for additional details	See mage-tab files linked to series entry for additional details	See mage-tab files linked to series entry for additional details	GPL96	Mervi,,Heiskanen	mervi.heiskanen@nih.gov	2402765175	CBIIT	NCI	9609 Medical Center Drive, 1W378	Rockville	MD	20850	USA	ftp://ftp.ncbi.nlm.nih.gov/geo/samples/GSM1672nnn/GSM1672316/suppl/GSM1672316_NCI_Lung39_U133A.CEL.gz	ftp://ftp.ncbi.nlm.nih.gov/geo/samples/GSM1672nnn/GSM1672316/suppl/GSM1672316_NCI_Lung39_U133A.mas5.CHP.gz	22283
GSM1672317	Public on May 02 2015	May 01 2015	May 02 2015	RNA	1	MI	Homo sapiens	disease_state: Lung Adenocarcinoma	Sex: Male	age: 51	race: White	vital_status: Dead	clinical_treatment_adjuvant_chemo: No	clinical_treatment_adjuvant_rt: No	disease_stage: pN0pT2	first_progression_or_relapse: No	months_to_first_progression: --	mths_to_last_clinical_assessment: 45.77	months_to_last_contact_or_death: 45.8	smoking_history: Unknown	surgical_margins: ALL MARGINS PATHOLOGICALLY NEGATIVE	organism_part: Lung	histologic_grade: POORLY DIFFERENTIATED	total RNA	See mage-tab files linked to series entry for additional details	biotin	See mage-tab files linked to series entry for additional details	9606	See mage-tab files linked to series entry for additional details	See mage-tab files linked to series entry for additional details	See mage-tab files linked to series entry for additional details	GPL96	Mervi,,Heiskanen	mervi.heiskanen@nih.gov	2402765175	CBIIT	NCI	9609 Medical Center Drive, 1W378	Rockville	MD	20850	USA	ftp://ftp.ncbi.nlm.nih.gov/geo/samples/GSM1672nnn/GSM1672317/suppl/GSM1672317_NCI_Lung40_U133A.CEL.gz	ftp://ftp.ncbi.nlm.nih.gov/geo/samples/GSM1672nnn/GSM1672317/suppl/GSM1672317_NCI_Lung40_U133A.mas5.CHP.gz	22283
GSM1672318	Public on May 02 2015	May 01 2015	May 02 2015	RNA	1	MI	Homo sapiens	disease_state: Lung Adenocarcinoma	Sex: Female	age: 63	race: Unknown	vital_status: Dead	clinical_treatment_adjuvant_chemo: Yes	clinical_treatment_adjuvant_rt: Yes	disease_stage: pN0pT2	first_progression_or_relapse: Yes	months_to_first_progression: 5	mths_to_last_clinical_assessment: 20.6	months_to_last_contact_or_death: 20.6	smoking_history: Smoked in the past	surgical_margins: ALL MARGINS PATHOLOGICALLY NEGATIVE	organism_part: Lung	histologic_grade: Moderate Differentiation	total RNA	See mage-tab files linked to series entry for additional details	biotin	See mage-tab files linked to series entry for additional details	9606	See mage-tab files linked to series entry for additional details	See mage-tab files linked to series entry for additional details	See mage-tab files linked to series entry for additional details	GPL96	Mervi,,Heiskanen	mervi.heiskanen@nih.gov	2402765175	CBIIT	NCI	9609 Medical Center Drive, 1W378	Rockville	MD	20850	USA	ftp://ftp.ncbi.nlm.nih.gov/geo/samples/GSM1672nnn/GSM1672318/suppl/GSM1672318_NCI_Lung41_U133A.CEL.gz	ftp://ftp.ncbi.nlm.nih.gov/geo/samples/GSM1672nnn/GSM1672318/suppl/GSM1672318_NCI_Lung41_U133A.mas5.CHP.gz	22283
GSM1672319	Public on May 02 2015	May 01 2015	May 02 2015	RNA	1	MI	Homo sapiens	disease_state: Lung Adenocarcinoma	Sex: Male	age: 60	race: White	vital_status: Alive	clinical_treatment_adjuvant_chemo: No	clinical_treatment_adjuvant_rt: No	disease_stage: pN0pT1	first_progression_or_relapse: No	months_to_first_progression: --	mths_to_last_clinical_assessment: 110.5	months_to_last_contact_or_death: 110.5	smoking_history: Smoked in the past	surgical_margins: ALL MARGINS PATHOLOGICALLY NEGATIVE	organism_part: Lung	histologic_grade: POORLY DIFFERENTIATED	total RNA	See mage-tab files linked to series entry for additional details	biotin	See mage-tab files linked to series entry for additional details	9606	See mage-tab files linked to series entry for additional details	See mage-tab files linked to series entry for additional details	See mage-tab files linked to series entry for additional details	GPL96	Mervi,,Heiskanen	mervi.heiskanen@nih.gov	2402765175	CBIIT	NCI	9609 Medical Center Drive, 1W378	Rockville	MD	20850	USA	ftp://ftp.ncbi.nlm.nih.gov/geo/samples/GSM1672nnn/GSM1672319/suppl/GSM1672319_NCI_Lung42_U133A.CEL.gz	ftp://ftp.ncbi.nlm.nih.gov/geo/samples/GSM1672nnn/GSM1672319/suppl/GSM1672319_NCI_Lung42_U133A.mas5.CHP.gz	22283
GSM1672320	Public on May 02 2015	May 01 2015	May 02 2015	RNA	1	MI	Homo sapiens	disease_state: Lung Adenocarcinoma	Sex: Male	age: 42	race: White	vital_status: Alive	clinical_treatment_adjuvant_chemo: No	clinical_treatment_adjuvant_rt: No	disease_stage: pN0pT1	first_progression_or_relapse: Yes	months_to_first_progression: 51	mths_to_last_clinical_assessment: 133.6	months_to_last_contact_or_death: 133.6	smoking_history: Smoked in the past	surgical_margins: ALL MARGINS PATHOLOGICALLY NEGATIVE	organism_part: Lung	histologic_grade: Moderate Differentiation	total RNA	See mage-tab files linked to series entry for additional details	biotin	See mage-tab files linked to series entry for additional details	9606	See mage-tab files linked to series entry for additional details	See mage-tab files linked to series entry for additional details	See mage-tab files linked to series entry for additional details	GPL96	Mervi,,Heiskanen	mervi.heiskanen@nih.gov	2402765175	CBIIT	NCI	9609 Medical Center Drive, 1W378	Rockville	MD	20850	USA	ftp://ftp.ncbi.nlm.nih.gov/geo/samples/GSM1672nnn/GSM1672320/suppl/GSM1672320_NCI_Lung43_U133A.CEL.gz	ftp://ftp.ncbi.nlm.nih.gov/geo/samples/GSM1672nnn/GSM1672320/suppl/GSM1672320_NCI_Lung43_U133A.mas5.CHP.gz	22283
GSM1672321	Public on May 02 2015	May 01 2015	May 02 2015	RNA	1	MI	Homo sapiens	disease_state: Lung Adenocarcinoma	Sex: Male	age: 56	race: White	vital_status: Dead	clinical_treatment_adjuvant_chemo: No	clinical_treatment_adjuvant_rt: No	disease_stage: pN1pT1	first_progression_or_relapse: Yes	months_to_first_progression: 30	mths_to_last_clinical_assessment: 70.5	months_to_last_contact_or_death: 70.5	smoking_history: Smoked in the past	surgical_margins: ALL MARGINS PATHOLOGICALLY NEGATIVE	organism_part: Lung	histologic_grade: Moderate Differentiation	total RNA	See mage-tab files linked to series entry for additional details	biotin	See mage-tab files linked to series entry for additional details	9606	See mage-tab files linked to series entry for additional details	See mage-tab files linked to series entry for additional details	See mage-tab files linked to series entry for additional details	GPL96	Mervi,,Heiskanen	mervi.heiskanen@nih.gov	2402765175	CBIIT	NCI	9609 Medical Center Drive, 1W378	Rockville	MD	20850	USA	ftp://ftp.ncbi.nlm.nih.gov/geo/samples/GSM1672nnn/GSM1672321/suppl/GSM1672321_NCI_Lung44_U133A.CEL.gz	ftp://ftp.ncbi.nlm.nih.gov/geo/samples/GSM1672nnn/GSM1672321/suppl/GSM1672321_NCI_Lung44_U133A.mas5.CHP.gz	22283
GSM1672322	Public on May 02 2015	May 01 2015	May 02 2015	RNA	1	MI	Homo sapiens	disease_state: Lung Adenocarcinoma	Sex: Female	age: 69	race: White	vital_status: Alive	clinical_treatment_adjuvant_chemo: No	clinical_treatment_adjuvant_rt: No	disease_stage: pN0pT1	first_progression_or_relapse: No	months_to_first_progression: --	mths_to_last_clinical_assessment: 52.1	months_to_last_contact_or_death: 52.1	smoking_history: Smoked in the past	surgical_margins: ALL MARGINS PATHOLOGICALLY NEGATIVE	organism_part: Lung	histologic_grade: WELL DIFFERENTIATED	total RNA	See mage-tab files linked to series entry for additional details	biotin	See mage-tab files linked to series entry for additional details	9606	See mage-tab files linked to series entry for additional details	See mage-tab files linked to series entry for additional details	See mage-tab files linked to series entry for additional details	GPL96	Mervi,,Heiskanen	mervi.heiskanen@nih.gov	2402765175	CBIIT	NCI	9609 Medical Center Drive, 1W378	Rockville	MD	20850	USA	ftp://ftp.ncbi.nlm.nih.gov/geo/samples/GSM1672nnn/GSM1672322/suppl/GSM1672322_NCI_Lung45_U133A.CEL.gz	ftp://ftp.ncbi.nlm.nih.gov/geo/samples/GSM1672nnn/GSM1672322/suppl/GSM1672322_NCI_Lung45_U133A.mas5.CHP.gz	22283
GSM1672323	Public on May 02 2015	May 01 2015	May 02 2015	RNA	1	MI	Homo sapiens	disease_state: Lung Adenocarcinoma	Sex: Female	age: 58	race: Asian	vital_status: Dead	clinical_treatment_adjuvant_chemo: No	clinical_treatment_adjuvant_rt: No	disease_stage: pN2pT2	first_progression_or_relapse: No	months_to_first_progression: --	mths_to_last_clinical_assessment: 17.6	months_to_last_contact_or_death: 17.6	smoking_history: Never smoked	surgical_margins: MICROSCOPICALLY POSITIVE MARGINS OR MICROSCOPIC RESIDUAL DISEASE	organism_part: Lung	histologic_grade: Moderate Differentiation	total RNA	See mage-tab files linked to series entry for additional details	biotin	See mage-tab files linked to series entry for additional details	9606	See mage-tab files linked to series entry for additional details	See mage-tab files linked to series entry for additional details	See mage-tab files linked to series entry for additional details	GPL96	Mervi,,Heiskanen	mervi.heiskanen@nih.gov	2402765175	CBIIT	NCI	9609 Medical Center Drive, 1W378	Rockville	MD	20850	USA	ftp://ftp.ncbi.nlm.nih.gov/geo/samples/GSM1672nnn/GSM1672323/suppl/GSM1672323_NCI_Lung46_U133A.CEL.gz	ftp://ftp.ncbi.nlm.nih.gov/geo/samples/GSM1672nnn/GSM1672323/suppl/GSM1672323_NCI_Lung46_U133A.mas5.CHP.gz	22283
GSM1672324	Public on May 02 2015	May 01 2015	May 02 2015	RNA	1	MI	Homo sapiens	disease_state: Lung Adenocarcinoma	Sex: Male	age: 62	race: Black or African American	vital_status: Dead	clinical_treatment_adjuvant_chemo: No	clinical_treatment_adjuvant_rt: No	disease_stage: pN2pT2	first_progression_or_relapse: Yes	months_to_first_progression: 4	mths_to_last_clinical_assessment: 16.87	months_to_last_contact_or_death: 16.9	smoking_history: Smoked in the past	surgical_margins: ALL MARGINS PATHOLOGICALLY NEGATIVE	organism_part: Lung	histologic_grade: Moderate Differentiation	total RNA	See mage-tab files linked to series entry for additional details	biotin	See mage-tab files linked to series entry for additional details	9606	See mage-tab files linked to series entry for additional details	See mage-tab files linked to series entry for additional details	See mage-tab files linked to series entry for additional details	GPL96	Mervi,,Heiskanen	mervi.heiskanen@nih.gov	2402765175	CBIIT	NCI	9609 Medical Center Drive, 1W378	Rockville	MD	20850	USA	ftp://ftp.ncbi.nlm.nih.gov/geo/samples/GSM1672nnn/GSM1672324/suppl/GSM1672324_NCI_Lung47_U133A.CEL.gz	ftp://ftp.ncbi.nlm.nih.gov/geo/samples/GSM1672nnn/GSM1672324/suppl/GSM1672324_NCI_Lung47_U133A.mas5.CHP.gz	22283
GSM1672325	Public on May 02 2015	May 01 2015	May 02 2015	RNA	1	MI	Homo sapiens	disease_state: Lung Adenocarcinoma	Sex: Female	age: 62	race: White	vital_status: Alive	clinical_treatment_adjuvant_chemo: No	clinical_treatment_adjuvant_rt: No	disease_stage: pN0pT1	first_progression_or_relapse: No	months_to_first_progression: --	mths_to_last_clinical_assessment: 86.8	months_to_last_contact_or_death: 86.8	smoking_history: Smoked in the past	surgical_margins: ALL MARGINS PATHOLOGICALLY NEGATIVE	organism_part: Lung	histologic_grade: WELL DIFFERENTIATED	total RNA	See mage-tab files linked to series entry for additional details	biotin	See mage-tab files linked to series entry for additional details	9606	See mage-tab files linked to series entry for additional details	See mage-tab files linked to series entry for additional details	See mage-tab files linked to series entry for additional details	GPL96	Mervi,,Heiskanen	mervi.heiskanen@nih.gov	2402765175	CBIIT	NCI	9609 Medical Center Drive, 1W378	Rockville	MD	20850	USA	ftp://ftp.ncbi.nlm.nih.gov/geo/samples/GSM1672nnn/GSM1672325/suppl/GSM1672325_NCI_Lung48_U133A.CEL.gz	ftp://ftp.ncbi.nlm.nih.gov/geo/samples/GSM1672nnn/GSM1672325/suppl/GSM1672325_NCI_Lung48_U133A.mas5.CHP.gz	22283
GSM1672326	Public on May 02 2015	May 01 2015	May 02 2015	RNA	1	MI	Homo sapiens	disease_state: Lung Adenocarcinoma	Sex: Male	age: 65	race: Unknown	vital_status: Alive	clinical_treatment_adjuvant_chemo: No	clinical_treatment_adjuvant_rt: No	disease_stage: pN0pT2	first_progression_or_relapse: Yes	months_to_first_progression: 102	mths_to_last_clinical_assessment: 103.4	months_to_last_contact_or_death: 103.4	smoking_history: Smoked in the past	surgical_margins: ALL MARGINS PATHOLOGICALLY NEGATIVE	organism_part: Lung	histologic_grade: Moderate Differentiation	total RNA	See mage-tab files linked to series entry for additional details	biotin	See mage-tab files linked to series entry for additional details	9606	See mage-tab files linked to series entry for additional details	See mage-tab files linked to series entry for additional details	See mage-tab files linked to series entry for additional details	GPL96	Mervi,,Heiskanen	mervi.heiskanen@nih.gov	2402765175	CBIIT	NCI	9609 Medical Center Drive, 1W378	Rockville	MD	20850	USA	ftp://ftp.ncbi.nlm.nih.gov/geo/samples/GSM1672nnn/GSM1672326/suppl/GSM1672326_NCI_Lung49_U133A.CEL.gz	ftp://ftp.ncbi.nlm.nih.gov/geo/samples/GSM1672nnn/GSM1672326/suppl/GSM1672326_NCI_Lung49_U133A.mas5.CHP.gz	22283
GSM1672327	Public on May 02 2015	May 01 2015	May 02 2015	RNA	1	MI	Homo sapiens	disease_state: Lung Adenocarcinoma	Sex: Female	age: 73	race: White	vital_status: Alive	clinical_treatment_adjuvant_chemo: Yes	clinical_treatment_adjuvant_rt: Yes	disease_stage: pN0pT2	first_progression_or_relapse: No	months_to_first_progression: --	mths_to_last_clinical_assessment: 117.6	months_to_last_contact_or_death: 117.6	smoking_history: Never smoked	surgical_margins: ALL MARGINS PATHOLOGICALLY NEGATIVE	organism_part: Lung	histologic_grade: Moderate Differentiation	total RNA	See mage-tab files linked to series entry for additional details	biotin	See mage-tab files linked to series entry for additional details	9606	See mage-tab files linked to series entry for additional details	See mage-tab files linked to series entry for additional details	See mage-tab files linked to series entry for additional details	GPL96	Mervi,,Heiskanen	mervi.heiskanen@nih.gov	2402765175	CBIIT	NCI	9609 Medical Center Drive, 1W378	Rockville	MD	20850	USA	ftp://ftp.ncbi.nlm.nih.gov/geo/samples/GSM1672nnn/GSM1672327/suppl/GSM1672327_NCI_Lung50_U133A.CEL.gz	ftp://ftp.ncbi.nlm.nih.gov/geo/samples/GSM1672nnn/GSM1672327/suppl/GSM1672327_NCI_Lung50_U133A.mas5.CHP.gz	22283
GSM1672328	Public on May 02 2015	May 01 2015	May 02 2015	RNA	1	MI	Homo sapiens	disease_state: Lung Adenocarcinoma	Sex: Female	age: 52	race: White	vital_status: Dead	clinical_treatment_adjuvant_chemo: Yes	clinical_treatment_adjuvant_rt: Yes	disease_stage: pN1pT2	first_progression_or_relapse: Yes	months_to_first_progression: 34	mths_to_last_clinical_assessment: 115.8	months_to_last_contact_or_death: 115.8	smoking_history: Smoked in the past	surgical_margins: ALL MARGINS PATHOLOGICALLY NEGATIVE	organism_part: Lung	histologic_grade: Moderate Differentiation	total RNA	See mage-tab files linked to series entry for additional details	biotin	See mage-tab files linked to series entry for additional details	9606	See mage-tab files linked to series entry for additional details	See mage-tab files linked to series entry for additional details	See mage-tab files linked to series entry for additional details	GPL96	Mervi,,Heiskanen	mervi.heiskanen@nih.gov	2402765175	CBIIT	NCI	9609 Medical Center Drive, 1W378	Rockville	MD	20850	USA	ftp://ftp.ncbi.nlm.nih.gov/geo/samples/GSM1672nnn/GSM1672328/suppl/GSM1672328_NCI_Lung51_U133A.CEL.gz	ftp://ftp.ncbi.nlm.nih.gov/geo/samples/GSM1672nnn/GSM1672328/suppl/GSM1672328_NCI_Lung51_U133A.mas5.CHP.gz	22283
GSM1672329	Public on May 02 2015	May 01 2015	May 02 2015	RNA	1	MI	Homo sapiens	disease_state: Lung Adenocarcinoma	Sex: Male	age: 72	race: White	vital_status: Dead	clinical_treatment_adjuvant_chemo: No	clinical_treatment_adjuvant_rt: No	disease_stage: pN0pT1	first_progression_or_relapse: No	months_to_first_progression: --	mths_to_last_clinical_assessment: 19	months_to_last_contact_or_death: 19	smoking_history: Smoked in the past	surgical_margins: ALL MARGINS PATHOLOGICALLY NEGATIVE	organism_part: Lung	histologic_grade: Moderate Differentiation	total RNA	See mage-tab files linked to series entry for additional details	biotin	See mage-tab files linked to series entry for additional details	9606	See mage-tab files linked to series entry for additional details	See mage-tab files linked to series entry for additional details	See mage-tab files linked to series entry for additional details	GPL96	Mervi,,Heiskanen	mervi.heiskanen@nih.gov	2402765175	CBIIT	NCI	9609 Medical Center Drive, 1W378	Rockville	MD	20850	USA	ftp://ftp.ncbi.nlm.nih.gov/geo/samples/GSM1672nnn/GSM1672329/suppl/GSM1672329_NCI_Lung52_U133A.CEL.gz	ftp://ftp.ncbi.nlm.nih.gov/geo/samples/GSM1672nnn/GSM1672329/suppl/GSM1672329_NCI_Lung52_U133A.mas5.CHP.gz	22283
GSM1672330	Public on May 02 2015	May 01 2015	May 02 2015	RNA	1	MI	Homo sapiens	disease_state: Lung Adenocarcinoma	Sex: Male	age: 65	race: White	vital_status: Dead	clinical_treatment_adjuvant_chemo: Yes	clinical_treatment_adjuvant_rt: Yes	disease_stage: pN0pT1	first_progression_or_relapse: Yes	months_to_first_progression: 79	mths_to_last_clinical_assessment: 84.1	months_to_last_contact_or_death: 84.1	smoking_history: Smoked in the past	surgical_margins: ALL MARGINS PATHOLOGICALLY NEGATIVE	organism_part: Lung	histologic_grade: Moderate Differentiation	total RNA	See mage-tab files linked to series entry for additional details	biotin	See mage-tab files linked to series entry for additional details	9606	See mage-tab files linked to series entry for additional details	See mage-tab files linked to series entry for additional details	See mage-tab files linked to series entry for additional details	GPL96	Mervi,,Heiskanen	mervi.heiskanen@nih.gov	2402765175	CBIIT	NCI	9609 Medical Center Drive, 1W378	Rockville	MD	20850	USA	ftp://ftp.ncbi.nlm.nih.gov/geo/samples/GSM1672nnn/GSM1672330/suppl/GSM1672330_NCI_Lung53_U133A.CEL.gz	ftp://ftp.ncbi.nlm.nih.gov/geo/samples/GSM1672nnn/GSM1672330/suppl/GSM1672330_NCI_Lung53_U133A.mas5.CHP.gz	22283
GSM1672331	Public on May 02 2015	May 01 2015	May 02 2015	RNA	1	MI	Homo sapiens	disease_state: Lung Adenocarcinoma	Sex: Female	age: 65	race: White	vital_status: Alive	clinical_treatment_adjuvant_chemo: No	clinical_treatment_adjuvant_rt: No	disease_stage: pN0pT1	first_progression_or_relapse: No	months_to_first_progression: --	mths_to_last_clinical_assessment: 153.3	months_to_last_contact_or_death: 153.3	smoking_history: Smoked in the past	surgical_margins: ALL MARGINS PATHOLOGICALLY NEGATIVE	organism_part: Lung	histologic_grade: POORLY DIFFERENTIATED	total RNA	See mage-tab files linked to series entry for additional details	biotin	See mage-tab files linked to series entry for additional details	9606	See mage-tab files linked to series entry for additional details	See mage-tab files linked to series entry for additional details	See mage-tab files linked to series entry for additional details	GPL96	Mervi,,Heiskanen	mervi.heiskanen@nih.gov	2402765175	CBIIT	NCI	9609 Medical Center Drive, 1W378	Rockville	MD	20850	USA	ftp://ftp.ncbi.nlm.nih.gov/geo/samples/GSM1672nnn/GSM1672331/suppl/GSM1672331_NCI_Lung54_U133A.CEL.gz	ftp://ftp.ncbi.nlm.nih.gov/geo/samples/GSM1672nnn/GSM1672331/suppl/GSM1672331_NCI_Lung54_U133A.mas5.CHP.gz	22283
GSM1672332	Public on May 02 2015	May 01 2015	May 02 2015	RNA	1	MI	Homo sapiens	disease_state: Lung Adenocarcinoma	Sex: Female	age: 59	race: White	vital_status: Alive	clinical_treatment_adjuvant_chemo: No	clinical_treatment_adjuvant_rt: No	disease_stage: pN0pT2	first_progression_or_relapse: No	months_to_first_progression: --	mths_to_last_clinical_assessment: 153.9	months_to_last_contact_or_death: 153.9	smoking_history: Unknown	surgical_margins: ALL MARGINS PATHOLOGICALLY NEGATIVE	organism_part: Lung	histologic_grade: Moderate Differentiation	total RNA	See mage-tab files linked to series entry for additional details	biotin	See mage-tab files linked to series entry for additional details	9606	See mage-tab files linked to series entry for additional details	See mage-tab files linked to series entry for additional details	See mage-tab files linked to series entry for additional details	GPL96	Mervi,,Heiskanen	mervi.heiskanen@nih.gov	2402765175	CBIIT	NCI	9609 Medical Center Drive, 1W378	Rockville	MD	20850	USA	ftp://ftp.ncbi.nlm.nih.gov/geo/samples/GSM1672nnn/GSM1672332/suppl/GSM1672332_NCI_Lung55_U133A.CEL.gz	ftp://ftp.ncbi.nlm.nih.gov/geo/samples/GSM1672nnn/GSM1672332/suppl/GSM1672332_NCI_Lung55_U133A.mas5.CHP.gz	22283
GSM1672333	Public on May 02 2015	May 01 2015	May 02 2015	RNA	1	MI	Homo sapiens	disease_state: Lung Adenocarcinoma	Sex: Female	age: 62	race: White	vital_status: Alive	clinical_treatment_adjuvant_chemo: No	clinical_treatment_adjuvant_rt: No	disease_stage: pN0pT1	first_progression_or_relapse: No	months_to_first_progression: --	mths_to_last_clinical_assessment: 162.6	months_to_last_contact_or_death: 162.6	smoking_history: Smoked in the past	surgical_margins: ALL MARGINS PATHOLOGICALLY NEGATIVE	organism_part: Lung	histologic_grade: WELL DIFFERENTIATED	total RNA	See mage-tab files linked to series entry for additional details	biotin	See mage-tab files linked to series entry for additional details	9606	See mage-tab files linked to series entry for additional details	See mage-tab files linked to series entry for additional details	See mage-tab files linked to series entry for additional details	GPL96	Mervi,,Heiskanen	mervi.heiskanen@nih.gov	2402765175	CBIIT	NCI	9609 Medical Center Drive, 1W378	Rockville	MD	20850	USA	ftp://ftp.ncbi.nlm.nih.gov/geo/samples/GSM1672nnn/GSM1672333/suppl/GSM1672333_NCI_Lung56_U133A.CEL.gz	ftp://ftp.ncbi.nlm.nih.gov/geo/samples/GSM1672nnn/GSM1672333/suppl/GSM1672333_NCI_Lung56_U133A.mas5.CHP.gz	22283
GSM1672334	Public on May 02 2015	May 01 2015	May 02 2015	RNA	1	MI	Homo sapiens	disease_state: Lung Adenocarcinoma	Sex: Male	age: 63	race: White	vital_status: Alive	clinical_treatment_adjuvant_chemo: No	clinical_treatment_adjuvant_rt: No	disease_stage: pN0pT2	first_progression_or_relapse: No	months_to_first_progression: --	mths_to_last_clinical_assessment: 63.8	months_to_last_contact_or_death: 63.8	smoking_history: Smoked in the past	surgical_margins: ALL MARGINS PATHOLOGICALLY NEGATIVE	organism_part: Lung	histologic_grade: POORLY DIFFERENTIATED	total RNA	See mage-tab files linked to series entry for additional details	biotin	See mage-tab files linked to series entry for additional details	9606	See mage-tab files linked to series entry for additional details	See mage-tab files linked to series entry for additional details	See mage-tab files linked to series entry for additional details	GPL96	Mervi,,Heiskanen	mervi.heiskanen@nih.gov	2402765175	CBIIT	NCI	9609 Medical Center Drive, 1W378	Rockville	MD	20850	USA	ftp://ftp.ncbi.nlm.nih.gov/geo/samples/GSM1672nnn/GSM1672334/suppl/GSM1672334_NCI_Lung57_U133A.CEL.gz	ftp://ftp.ncbi.nlm.nih.gov/geo/samples/GSM1672nnn/GSM1672334/suppl/GSM1672334_NCI_Lung57_U133A.mas5.CHP.gz	22283
GSM1672335	Public on May 02 2015	May 01 2015	May 02 2015	RNA	1	MI	Homo sapiens	disease_state: Lung Adenocarcinoma	Sex: Female	age: 54	race: White	vital_status: Dead	clinical_treatment_adjuvant_chemo: Yes	clinical_treatment_adjuvant_rt: Yes	disease_stage: pN0pT1	first_progression_or_relapse: Yes	months_to_first_progression: 94	mths_to_last_clinical_assessment: --	months_to_last_contact_or_death: 132.5	smoking_history: Smoked in the past	surgical_margins: ALL MARGINS PATHOLOGICALLY NEGATIVE	organism_part: Lung	histologic_grade: Moderate Differentiation	total RNA	See mage-tab files linked to series entry for additional details	biotin	See mage-tab files linked to series entry for additional details	9606	See mage-tab files linked to series entry for additional details	See mage-tab files linked to series entry for additional details	See mage-tab files linked to series entry for additional details	GPL96	Mervi,,Heiskanen	mervi.heiskanen@nih.gov	2402765175	CBIIT	NCI	9609 Medical Center Drive, 1W378	Rockville	MD	20850	USA	ftp://ftp.ncbi.nlm.nih.gov/geo/samples/GSM1672nnn/GSM1672335/suppl/GSM1672335_NCI_Lung58_U133A.CEL.gz	ftp://ftp.ncbi.nlm.nih.gov/geo/samples/GSM1672nnn/GSM1672335/suppl/GSM1672335_NCI_Lung58_U133A.mas5.CHP.gz	22283
GSM1672336	Public on May 02 2015	May 01 2015	May 02 2015	RNA	1	MI	Homo sapiens	disease_state: Lung Adenocarcinoma	Sex: Female	age: 57	race: White	vital_status: Alive	clinical_treatment_adjuvant_chemo: No	clinical_treatment_adjuvant_rt: No	disease_stage: pN0pT1	first_progression_or_relapse: No	months_to_first_progression: --	mths_to_last_clinical_assessment: 130.8	months_to_last_contact_or_death: 130.8	smoking_history: --	surgical_margins: ALL MARGINS PATHOLOGICALLY NEGATIVE	organism_part: Lung	histologic_grade: POORLY DIFFERENTIATED	total RNA	See mage-tab files linked to series entry for additional details	biotin	See mage-tab files linked to series entry for additional details	9606	See mage-tab files linked to series entry for additional details	See mage-tab files linked to series entry for additional details	See mage-tab files linked to series entry for additional details	GPL96	Mervi,,Heiskanen	mervi.heiskanen@nih.gov	2402765175	CBIIT	NCI	9609 Medical Center Drive, 1W378	Rockville	MD	20850	USA	ftp://ftp.ncbi.nlm.nih.gov/geo/samples/GSM1672nnn/GSM1672336/suppl/GSM1672336_NCI_Lung_59_U133A.CEL.gz	ftp://ftp.ncbi.nlm.nih.gov/geo/samples/GSM1672nnn/GSM1672336/suppl/GSM1672336_NCI_Lung_59_U133A.mas5.CHP.gz	22283
GSM1672337	Public on May 02 2015	May 01 2015	May 02 2015	RNA	1	MI	Homo sapiens	disease_state: Lung Adenocarcinoma	Sex: Female	age: 59	race: Black or African American	vital_status: Alive	clinical_treatment_adjuvant_chemo: No	clinical_treatment_adjuvant_rt: No	disease_stage: pN0pT1	first_progression_or_relapse: No	months_to_first_progression: --	mths_to_last_clinical_assessment: 159.6	months_to_last_contact_or_death: 159.6	smoking_history: Smoked in the past	surgical_margins: ALL MARGINS PATHOLOGICALLY NEGATIVE	organism_part: Lung	histologic_grade: Moderate Differentiation	total RNA	See mage-tab files linked to series entry for additional details	biotin	See mage-tab files linked to series entry for additional details	9606	See mage-tab files linked to series entry for additional details	See mage-tab files linked to series entry for additional details	See mage-tab files linked to series entry for additional details	GPL96	Mervi,,Heiskanen	mervi.heiskanen@nih.gov	2402765175	CBIIT	NCI	9609 Medical Center Drive, 1W378	Rockville	MD	20850	USA	ftp://ftp.ncbi.nlm.nih.gov/geo/samples/GSM1672nnn/GSM1672337/suppl/GSM1672337_NCI_Lung_60_U133A.CEL.gz	ftp://ftp.ncbi.nlm.nih.gov/geo/samples/GSM1672nnn/GSM1672337/suppl/GSM1672337_NCI_Lung_60_U133A.mas5.CHP.gz	22283
GSM1672338	Public on May 02 2015	May 01 2015	May 02 2015	RNA	1	MI	Homo sapiens	disease_state: Lung Adenocarcinoma	Sex: Female	age: 48	race: White	vital_status: Alive	clinical_treatment_adjuvant_chemo: No	clinical_treatment_adjuvant_rt: No	disease_stage: pN0pT1	first_progression_or_relapse: No	months_to_first_progression: --	mths_to_last_clinical_assessment: 157.7	months_to_last_contact_or_death: 157.7	smoking_history: Never smoked	surgical_margins: ALL MARGINS PATHOLOGICALLY NEGATIVE	organism_part: Lung	histologic_grade: POORLY DIFFERENTIATED	total RNA	See mage-tab files linked to series entry for additional details	biotin	See mage-tab files linked to series entry for additional details	9606	See mage-tab files linked to series entry for additional details	See mage-tab files linked to series entry for additional details	See mage-tab files linked to series entry for additional details	GPL96	Mervi,,Heiskanen	mervi.heiskanen@nih.gov	2402765175	CBIIT	NCI	9609 Medical Center Drive, 1W378	Rockville	MD	20850	USA	ftp://ftp.ncbi.nlm.nih.gov/geo/samples/GSM1672nnn/GSM1672338/suppl/GSM1672338_NCI_Lung_61_U133A.CEL.gz	ftp://ftp.ncbi.nlm.nih.gov/geo/samples/GSM1672nnn/GSM1672338/suppl/GSM1672338_NCI_Lung_61_U133A.mas5.CHP.gz	22283
GSM1672339	Public on May 02 2015	May 01 2015	May 02 2015	RNA	1	MI	Homo sapiens	disease_state: Lung Adenocarcinoma	Sex: Female	age: 44	race: White	vital_status: Alive	clinical_treatment_adjuvant_chemo: No	clinical_treatment_adjuvant_rt: No	disease_stage: pN0pT1	first_progression_or_relapse: No	months_to_first_progression: --	mths_to_last_clinical_assessment: 76.3	months_to_last_contact_or_death: 76.3	smoking_history: Smoked in the past	surgical_margins: ALL MARGINS PATHOLOGICALLY NEGATIVE	organism_part: Lung	histologic_grade: Moderate Differentiation	total RNA	See mage-tab files linked to series entry for additional details	biotin	See mage-tab files linked to series entry for additional details	9606	See mage-tab files linked to series entry for additional details	See mage-tab files linked to series entry for additional details	See mage-tab files linked to series entry for additional details	GPL96	Mervi,,Heiskanen	mervi.heiskanen@nih.gov	2402765175	CBIIT	NCI	9609 Medical Center Drive, 1W378	Rockville	MD	20850	USA	ftp://ftp.ncbi.nlm.nih.gov/geo/samples/GSM1672nnn/GSM1672339/suppl/GSM1672339_NCI_Lung_62_U133A.CEL.gz	ftp://ftp.ncbi.nlm.nih.gov/geo/samples/GSM1672nnn/GSM1672339/suppl/GSM1672339_NCI_Lung_62_U133A.mas5.CHP.gz	22283
GSM1672340	Public on May 02 2015	May 01 2015	May 02 2015	RNA	1	MI	Homo sapiens	disease_state: Lung Adenocarcinoma	Sex: Female	age: 40	race: White	vital_status: Alive	clinical_treatment_adjuvant_chemo: No	clinical_treatment_adjuvant_rt: No	disease_stage: pN0pT1	first_progression_or_relapse: No	months_to_first_progression: --	mths_to_last_clinical_assessment: 105.9	months_to_last_contact_or_death: 105.9	smoking_history: Smoked in the past	surgical_margins: ALL MARGINS PATHOLOGICALLY NEGATIVE	organism_part: Lung	histologic_grade: Moderate Differentiation	total RNA	See mage-tab files linked to series entry for additional details	biotin	See mage-tab files linked to series entry for additional details	9606	See mage-tab files linked to series entry for additional details	See mage-tab files linked to series entry for additional details	See mage-tab files linked to series entry for additional details	GPL96	Mervi,,Heiskanen	mervi.heiskanen@nih.gov	2402765175	CBIIT	NCI	9609 Medical Center Drive, 1W378	Rockville	MD	20850	USA	ftp://ftp.ncbi.nlm.nih.gov/geo/samples/GSM1672nnn/GSM1672340/suppl/GSM1672340_NCI_Lung_63_U133A.CEL.gz	ftp://ftp.ncbi.nlm.nih.gov/geo/samples/GSM1672nnn/GSM1672340/suppl/GSM1672340_NCI_Lung_63_U133A.mas5.CHP.gz	22283
GSM1672341	Public on May 02 2015	May 01 2015	May 02 2015	RNA	1	MI	Homo sapiens	disease_state: Lung Adenocarcinoma	Sex: Male	age: 64	race: Not Reported	vital_status: Dead	clinical_treatment_adjuvant_chemo: No	clinical_treatment_adjuvant_rt: No	disease_stage: pN2pT2	first_progression_or_relapse: No	months_to_first_progression: --	mths_to_last_clinical_assessment: 28.17	months_to_last_contact_or_death: 28.2	smoking_history: Smoked in the past	surgical_margins: ALL MARGINS PATHOLOGICALLY NEGATIVE	organism_part: Lung	histologic_grade: Moderate Differentiation	total RNA	See mage-tab files linked to series entry for additional details	biotin	See mage-tab files linked to series entry for additional details	9606	See mage-tab files linked to series entry for additional details	See mage-tab files linked to series entry for additional details	See mage-tab files linked to series entry for additional details	GPL96	Mervi,,Heiskanen	mervi.heiskanen@nih.gov	2402765175	CBIIT	NCI	9609 Medical Center Drive, 1W378	Rockville	MD	20850	USA	ftp://ftp.ncbi.nlm.nih.gov/geo/samples/GSM1672nnn/GSM1672341/suppl/GSM1672341_NCI_Lung_64_U133A.CEL.gz	ftp://ftp.ncbi.nlm.nih.gov/geo/samples/GSM1672nnn/GSM1672341/suppl/GSM1672341_NCI_Lung_64_U133A.mas5.CHP.gz	22283
GSM1672342	Public on May 02 2015	May 01 2015	May 02 2015	RNA	1	MI	Homo sapiens	disease_state: Lung Adenocarcinoma	Sex: Male	age: 69	race: White	vital_status: Dead	clinical_treatment_adjuvant_chemo: No	clinical_treatment_adjuvant_rt: No	disease_stage: pN2pT1	first_progression_or_relapse: Yes	months_to_first_progression: 5	mths_to_last_clinical_assessment: 7.2	months_to_last_contact_or_death: 7.2	smoking_history: Smoked in the past	surgical_margins: ALL MARGINS PATHOLOGICALLY NEGATIVE	organism_part: Lung	histologic_grade: Moderate Differentiation	total RNA	See mage-tab files linked to series entry for additional details	biotin	See mage-tab files linked to series entry for additional details	9606	See mage-tab files linked to series entry for additional details	See mage-tab files linked to series entry for additional details	See mage-tab files linked to series entry for additional details	GPL96	Mervi,,Heiskanen	mervi.heiskanen@nih.gov	2402765175	CBIIT	NCI	9609 Medical Center Drive, 1W378	Rockville	MD	20850	USA	ftp://ftp.ncbi.nlm.nih.gov/geo/samples/GSM1672nnn/GSM1672342/suppl/GSM1672342_NCI_Lung_65_U133A.CEL.gz	ftp://ftp.ncbi.nlm.nih.gov/geo/samples/GSM1672nnn/GSM1672342/suppl/GSM1672342_NCI_Lung_65_U133A.mas5.CHP.gz	22283
GSM1672343	Public on May 02 2015	May 01 2015	May 02 2015	RNA	1	MI	Homo sapiens	disease_state: Lung Adenocarcinoma	Sex: Male	age: 67	race: White	vital_status: Dead	clinical_treatment_adjuvant_chemo: No	clinical_treatment_adjuvant_rt: No	disease_stage: pN0pT1	first_progression_or_relapse: Yes	months_to_first_progression: --	mths_to_last_clinical_assessment: 79.47	months_to_last_contact_or_death: 79.5	smoking_history: Smoked in the past	surgical_margins: ALL MARGINS PATHOLOGICALLY NEGATIVE	organism_part: Lung	histologic_grade: Moderate Differentiation	total RNA	See mage-tab files linked to series entry for additional details	biotin	See mage-tab files linked to series entry for additional details	9606	See mage-tab files linked to series entry for additional details	See mage-tab files linked to series entry for additional details	See mage-tab files linked to series entry for additional details	GPL96	Mervi,,Heiskanen	mervi.heiskanen@nih.gov	2402765175	CBIIT	NCI	9609 Medical Center Drive, 1W378	Rockville	MD	20850	USA	ftp://ftp.ncbi.nlm.nih.gov/geo/samples/GSM1672nnn/GSM1672343/suppl/GSM1672343_NCI_Lung_66_U133A.CEL.gz	ftp://ftp.ncbi.nlm.nih.gov/geo/samples/GSM1672nnn/GSM1672343/suppl/GSM1672343_NCI_Lung_66_U133A.mas5.CHP.gz	22283
GSM1672344	Public on May 02 2015	May 01 2015	May 02 2015	RNA	1	MI	Homo sapiens	disease_state: Lung Adenocarcinoma	Sex: Female	age: 62	race: White	vital_status: Alive	clinical_treatment_adjuvant_chemo: No	clinical_treatment_adjuvant_rt: No	disease_stage: pN0pT1	first_progression_or_relapse: Yes	months_to_first_progression: 50	mths_to_last_clinical_assessment: 82.3	months_to_last_contact_or_death: 82.3	smoking_history: Smoked in the past	surgical_margins: ALL MARGINS PATHOLOGICALLY NEGATIVE	organism_part: Lung	histologic_grade: Moderate Differentiation	total RNA	See mage-tab files linked to series entry for additional details	biotin	See mage-tab files linked to series entry for additional details	9606	See mage-tab files linked to series entry for additional details	See mage-tab files linked to series entry for additional details	See mage-tab files linked to series entry for additional details	GPL96	Mervi,,Heiskanen	mervi.heiskanen@nih.gov	2402765175	CBIIT	NCI	9609 Medical Center Drive, 1W378	Rockville	MD	20850	USA	ftp://ftp.ncbi.nlm.nih.gov/geo/samples/GSM1672nnn/GSM1672344/suppl/GSM1672344_NCI_Lung_67_U133A.CEL.gz	ftp://ftp.ncbi.nlm.nih.gov/geo/samples/GSM1672nnn/GSM1672344/suppl/GSM1672344_NCI_Lung_67_U133A.mas5.CHP.gz	22283
GSM1672345	Public on May 02 2015	May 01 2015	May 02 2015	RNA	1	MI	Homo sapiens	disease_state: Lung Adenocarcinoma	Sex: Male	age: 60	race: White	vital_status: Alive	clinical_treatment_adjuvant_chemo: No	clinical_treatment_adjuvant_rt: No	disease_stage: pN0pT2	first_progression_or_relapse: No	months_to_first_progression: --	mths_to_last_clinical_assessment: 101.2	months_to_last_contact_or_death: 101.2	smoking_history: Smoked in the past	surgical_margins: ALL MARGINS PATHOLOGICALLY NEGATIVE	organism_part: Lung	histologic_grade: Moderate Differentiation	total RNA	See mage-tab files linked to series entry for additional details	biotin	See mage-tab files linked to series entry for additional details	9606	See mage-tab files linked to series entry for additional details	See mage-tab files linked to series entry for additional details	See mage-tab files linked to series entry for additional details	GPL96	Mervi,,Heiskanen	mervi.heiskanen@nih.gov	2402765175	CBIIT	NCI	9609 Medical Center Drive, 1W378	Rockville	MD	20850	USA	ftp://ftp.ncbi.nlm.nih.gov/geo/samples/GSM1672nnn/GSM1672345/suppl/GSM1672345_NCI_Lung_68_U133A.CEL.gz	ftp://ftp.ncbi.nlm.nih.gov/geo/samples/GSM1672nnn/GSM1672345/suppl/GSM1672345_NCI_Lung_68_U133A.mas5.CHP.gz	22283
GSM1672346	Public on May 02 2015	May 01 2015	May 02 2015	RNA	1	MI	Homo sapiens	disease_state: Lung Adenocarcinoma	Sex: Male	age: 46	race: Asian	vital_status: Alive	clinical_treatment_adjuvant_chemo: No	clinical_treatment_adjuvant_rt: No	disease_stage: pN0pT1	first_progression_or_relapse: No	months_to_first_progression: --	mths_to_last_clinical_assessment: 168.1	months_to_last_contact_or_death: 168.1	smoking_history: Smoked in the past	surgical_margins: ALL MARGINS PATHOLOGICALLY NEGATIVE	organism_part: Lung	histologic_grade: POORLY DIFFERENTIATED	total RNA	See mage-tab files linked to series entry for additional details	biotin	See mage-tab files linked to series entry for additional details	9606	See mage-tab files linked to series entry for additional details	See mage-tab files linked to series entry for additional details	See mage-tab files linked to series entry for additional details	GPL96	Mervi,,Heiskanen	mervi.heiskanen@nih.gov	2402765175	CBIIT	NCI	9609 Medical Center Drive, 1W378	Rockville	MD	20850	USA	ftp://ftp.ncbi.nlm.nih.gov/geo/samples/GSM1672nnn/GSM1672346/suppl/GSM1672346_NCI_Lung_69_U133A.CEL.gz	ftp://ftp.ncbi.nlm.nih.gov/geo/samples/GSM1672nnn/GSM1672346/suppl/GSM1672346_NCI_Lung_69_U133A.mas5.CHP.gz	22283
GSM1672347	Public on May 02 2015	May 01 2015	May 02 2015	RNA	1	MI	Homo sapiens	disease_state: Lung Adenocarcinoma	Sex: Male	age: 77	race: White	vital_status: Dead	clinical_treatment_adjuvant_chemo: Unknown	clinical_treatment_adjuvant_rt: Unknown	disease_stage: pN2pT1	first_progression_or_relapse: No	months_to_first_progression: --	mths_to_last_clinical_assessment: 14.87	months_to_last_contact_or_death: 14.9	smoking_history: Smoked in the past	surgical_margins: ALL MARGINS PATHOLOGICALLY NEGATIVE	organism_part: Lung	histologic_grade: Moderate Differentiation	total RNA	See mage-tab files linked to series entry for additional details	biotin	See mage-tab files linked to series entry for additional details	9606	See mage-tab files linked to series entry for additional details	See mage-tab files linked to series entry for additional details	See mage-tab files linked to series entry for additional details	GPL96	Mervi,,Heiskanen	mervi.heiskanen@nih.gov	2402765175	CBIIT	NCI	9609 Medical Center Drive, 1W378	Rockville	MD	20850	USA	ftp://ftp.ncbi.nlm.nih.gov/geo/samples/GSM1672nnn/GSM1672347/suppl/GSM1672347_NCI_Lung_70_U133A.CEL.gz	ftp://ftp.ncbi.nlm.nih.gov/geo/samples/GSM1672nnn/GSM1672347/suppl/GSM1672347_NCI_Lung_70_U133A.mas5.CHP.gz	22283
GSM1672348	Public on May 02 2015	May 01 2015	May 02 2015	RNA	1	MI	Homo sapiens	disease_state: Lung Adenocarcinoma	Sex: Male	age: 56	race: White	vital_status: Dead	clinical_treatment_adjuvant_chemo: No	clinical_treatment_adjuvant_rt: No	disease_stage: pN2pT2	first_progression_or_relapse: Yes	months_to_first_progression: 7	mths_to_last_clinical_assessment: 9.57	months_to_last_contact_or_death: 9.6	smoking_history: Smoked in the past	surgical_margins: ALL MARGINS PATHOLOGICALLY NEGATIVE	organism_part: Lung	histologic_grade: Moderate Differentiation	total RNA	See mage-tab files linked to series entry for additional details	biotin	See mage-tab files linked to series entry for additional details	9606	See mage-tab files linked to series entry for additional details	See mage-tab files linked to series entry for additional details	See mage-tab files linked to series entry for additional details	GPL96	Mervi,,Heiskanen	mervi.heiskanen@nih.gov	2402765175	CBIIT	NCI	9609 Medical Center Drive, 1W378	Rockville	MD	20850	USA	ftp://ftp.ncbi.nlm.nih.gov/geo/samples/GSM1672nnn/GSM1672348/suppl/GSM1672348_NCI_Lung_71_U133A.CEL.gz	ftp://ftp.ncbi.nlm.nih.gov/geo/samples/GSM1672nnn/GSM1672348/suppl/GSM1672348_NCI_Lung_71_U133A.mas5.CHP.gz	22283
GSM1672349	Public on May 02 2015	May 01 2015	May 02 2015	RNA	1	MI	Homo sapiens	disease_state: Lung Adenocarcinoma	Sex: Female	age: 53	race: White	vital_status: Alive	clinical_treatment_adjuvant_chemo: No	clinical_treatment_adjuvant_rt: No	disease_stage: pN0pT1	first_progression_or_relapse: No	months_to_first_progression: --	mths_to_last_clinical_assessment: 95	months_to_last_contact_or_death: 95	smoking_history: Smoked in the past	surgical_margins: ALL MARGINS PATHOLOGICALLY NEGATIVE	organism_part: Lung	histologic_grade: Moderate Differentiation	total RNA	See mage-tab files linked to series entry for additional details	biotin	See mage-tab files linked to series entry for additional details	9606	See mage-tab files linked to series entry for additional details	See mage-tab files linked to series entry for additional details	See mage-tab files linked to series entry for additional details	GPL96	Mervi,,Heiskanen	mervi.heiskanen@nih.gov	2402765175	CBIIT	NCI	9609 Medical Center Drive, 1W378	Rockville	MD	20850	USA	ftp://ftp.ncbi.nlm.nih.gov/geo/samples/GSM1672nnn/GSM1672349/suppl/GSM1672349_NCI_Lung_72_U133A.CEL.gz	ftp://ftp.ncbi.nlm.nih.gov/geo/samples/GSM1672nnn/GSM1672349/suppl/GSM1672349_NCI_Lung_72_U133A.mas5.CHP.gz	22283
GSM1672350	Public on May 02 2015	May 01 2015	May 02 2015	RNA	1	MI	Homo sapiens	disease_state: Lung Adenocarcinoma	Sex: Male	age: 51	race: White	vital_status: Alive	clinical_treatment_adjuvant_chemo: No	clinical_treatment_adjuvant_rt: No	disease_stage: pN0pT2	first_progression_or_relapse: No	months_to_first_progression: --	mths_to_last_clinical_assessment: 62.4	months_to_last_contact_or_death: 62.4	smoking_history: Smoked in the past	surgical_margins: ALL MARGINS PATHOLOGICALLY NEGATIVE	organism_part: Lung	histologic_grade: Moderate Differentiation	total RNA	See mage-tab files linked to series entry for additional details	biotin	See mage-tab files linked to series entry for additional details	9606	See mage-tab files linked to series entry for additional details	See mage-tab files linked to series entry for additional details	See mage-tab files linked to series entry for additional details	GPL96	Mervi,,Heiskanen	mervi.heiskanen@nih.gov	2402765175	CBIIT	NCI	9609 Medical Center Drive, 1W378	Rockville	MD	20850	USA	ftp://ftp.ncbi.nlm.nih.gov/geo/samples/GSM1672nnn/GSM1672350/suppl/GSM1672350_NCI_Lung_73_U133A.CEL.gz	ftp://ftp.ncbi.nlm.nih.gov/geo/samples/GSM1672nnn/GSM1672350/suppl/GSM1672350_NCI_Lung_73_U133A.mas5.CHP.gz	22283
GSM1672351	Public on May 02 2015	May 01 2015	May 02 2015	RNA	1	MI	Homo sapiens	disease_state: Lung Adenocarcinoma	Sex: Female	age: 63	race: Black or African American	vital_status: Alive	clinical_treatment_adjuvant_chemo: No	clinical_treatment_adjuvant_rt: No	disease_stage: pN1pT2	first_progression_or_relapse: No	months_to_first_progression: --	mths_to_last_clinical_assessment: 20.9	months_to_last_contact_or_death: 64.3	smoking_history: Smoked in the past	surgical_margins: ALL MARGINS PATHOLOGICALLY NEGATIVE	organism_part: Lung	histologic_grade: Moderate Differentiation	total RNA	See mage-tab files linked to series entry for additional details	biotin	See mage-tab files linked to series entry for additional details	9606	See mage-tab files linked to series entry for additional details	See mage-tab files linked to series entry for additional details	See mage-tab files linked to series entry for additional details	GPL96	Mervi,,Heiskanen	mervi.heiskanen@nih.gov	2402765175	CBIIT	NCI	9609 Medical Center Drive, 1W378	Rockville	MD	20850	USA	ftp://ftp.ncbi.nlm.nih.gov/geo/samples/GSM1672nnn/GSM1672351/suppl/GSM1672351_NCI_Lung_74_U133A.CEL.gz	ftp://ftp.ncbi.nlm.nih.gov/geo/samples/GSM1672nnn/GSM1672351/suppl/GSM1672351_NCI_Lung_74_U133A.mas5.CHP.gz	22283
GSM1672352	Public on May 02 2015	May 01 2015	May 02 2015	RNA	1	MI	Homo sapiens	disease_state: Lung Adenocarcinoma	Sex: Female	age: 85	race: White	vital_status: Dead	clinical_treatment_adjuvant_chemo: No	clinical_treatment_adjuvant_rt: No	disease_stage: pN0pT1	first_progression_or_relapse: No	months_to_first_progression: --	mths_to_last_clinical_assessment: 20.87	months_to_last_contact_or_death: 20.9	smoking_history: Smoked in the past	surgical_margins: ALL MARGINS PATHOLOGICALLY NEGATIVE	organism_part: Lung	histologic_grade: WELL DIFFERENTIATED	total RNA	See mage-tab files linked to series entry for additional details	biotin	See mage-tab files linked to series entry for additional details	9606	See mage-tab files linked to series entry for additional details	See mage-tab files linked to series entry for additional details	See mage-tab files linked to series entry for additional details	GPL96	Mervi,,Heiskanen	mervi.heiskanen@nih.gov	2402765175	CBIIT	NCI	9609 Medical Center Drive, 1W378	Rockville	MD	20850	USA	ftp://ftp.ncbi.nlm.nih.gov/geo/samples/GSM1672nnn/GSM1672352/suppl/GSM1672352_NCI_Lung_75_U133A.CEL.gz	ftp://ftp.ncbi.nlm.nih.gov/geo/samples/GSM1672nnn/GSM1672352/suppl/GSM1672352_NCI_Lung_75_U133A.mas5.CHP.gz	22283
GSM1672353	Public on May 02 2015	May 01 2015	May 02 2015	RNA	1	MI	Homo sapiens	disease_state: Lung Adenocarcinoma	Sex: Female	age: 60	race: White	vital_status: Dead	clinical_treatment_adjuvant_chemo: No	clinical_treatment_adjuvant_rt: No	disease_stage: pN1pT1	first_progression_or_relapse: Yes	months_to_first_progression: 22	mths_to_last_clinical_assessment: 22.3	months_to_last_contact_or_death: 22.3	smoking_history: Smoked in the past	surgical_margins: ALL MARGINS PATHOLOGICALLY NEGATIVE	organism_part: Lung	histologic_grade: Moderate Differentiation	total RNA	See mage-tab files linked to series entry for additional details	biotin	See mage-tab files linked to series entry for additional details	9606	See mage-tab files linked to series entry for additional details	See mage-tab files linked to series entry for additional details	See mage-tab files linked to series entry for additional details	GPL96	Mervi,,Heiskanen	mervi.heiskanen@nih.gov	2402765175	CBIIT	NCI	9609 Medical Center Drive, 1W378	Rockville	MD	20850	USA	ftp://ftp.ncbi.nlm.nih.gov/geo/samples/GSM1672nnn/GSM1672353/suppl/GSM1672353_NCI_Lung_76_U133A.CEL.gz	ftp://ftp.ncbi.nlm.nih.gov/geo/samples/GSM1672nnn/GSM1672353/suppl/GSM1672353_NCI_Lung_76_U133A.mas5.CHP.gz	22283
GSM1672354	Public on May 02 2015	May 01 2015	May 02 2015	RNA	1	MI	Homo sapiens	disease_state: Lung Adenocarcinoma	Sex: Male	age: 58	race: White	vital_status: Dead	clinical_treatment_adjuvant_chemo: No	clinical_treatment_adjuvant_rt: No	disease_stage: pN1pT2	first_progression_or_relapse: Yes	months_to_first_progression: 12	mths_to_last_clinical_assessment: 67.9	months_to_last_contact_or_death: 67.9	smoking_history: Smoked in the past	surgical_margins: ALL MARGINS PATHOLOGICALLY NEGATIVE	organism_part: Lung	histologic_grade: WELL DIFFERENTIATED	total RNA	See mage-tab files linked to series entry for additional details	biotin	See mage-tab files linked to series entry for additional details	9606	See mage-tab files linked to series entry for additional details	See mage-tab files linked to series entry for additional details	See mage-tab files linked to series entry for additional details	GPL96	Mervi,,Heiskanen	mervi.heiskanen@nih.gov	2402765175	CBIIT	NCI	9609 Medical Center Drive, 1W378	Rockville	MD	20850	USA	ftp://ftp.ncbi.nlm.nih.gov/geo/samples/GSM1672nnn/GSM1672354/suppl/GSM1672354_NCI_Lung_77_U133A.CEL.gz	ftp://ftp.ncbi.nlm.nih.gov/geo/samples/GSM1672nnn/GSM1672354/suppl/GSM1672354_NCI_Lung_77_U133A.mas5.CHP.gz	22283
GSM1672355	Public on May 02 2015	May 01 2015	May 02 2015	RNA	1	MI	Homo sapiens	disease_state: Lung Adenocarcinoma	Sex: Male	age: 81	race: White	vital_status: Alive	clinical_treatment_adjuvant_chemo: No	clinical_treatment_adjuvant_rt: No	disease_stage: pN0pT1	first_progression_or_relapse: No	months_to_first_progression: --	mths_to_last_clinical_assessment: 36.3	months_to_last_contact_or_death: 36.3	smoking_history: Smoked in the past	surgical_margins: ALL MARGINS PATHOLOGICALLY NEGATIVE	organism_part: Lung	histologic_grade: Moderate Differentiation	total RNA	See mage-tab files linked to series entry for additional details	biotin	See mage-tab files linked to series entry for additional details	9606	See mage-tab files linked to series entry for additional details	See mage-tab files linked to series entry for additional details	See mage-tab files linked to series entry for additional details	GPL96	Mervi,,Heiskanen	mervi.heiskanen@nih.gov	2402765175	CBIIT	NCI	9609 Medical Center Drive, 1W378	Rockville	MD	20850	USA	ftp://ftp.ncbi.nlm.nih.gov/geo/samples/GSM1672nnn/GSM1672355/suppl/GSM1672355_NCI_Lung_78_U133A.CEL.gz	ftp://ftp.ncbi.nlm.nih.gov/geo/samples/GSM1672nnn/GSM1672355/suppl/GSM1672355_NCI_Lung_78_U133A.mas5.CHP.gz	22283
GSM1672356	Public on May 02 2015	May 01 2015	May 02 2015	RNA	1	MI	Homo sapiens	disease_state: Lung Adenocarcinoma	Sex: Female	age: 52	race: White	vital_status: Dead	clinical_treatment_adjuvant_chemo: Yes	clinical_treatment_adjuvant_rt: Yes	disease_stage: pN1pT2	first_progression_or_relapse: Yes	months_to_first_progression: 14	mths_to_last_clinical_assessment: 22.67	months_to_last_contact_or_death: 22.7	smoking_history: Smoked in the past	surgical_margins: ALL MARGINS PATHOLOGICALLY NEGATIVE	organism_part: Lung	histologic_grade: POORLY DIFFERENTIATED	total RNA	See mage-tab files linked to series entry for additional details	biotin	See mage-tab files linked to series entry for additional details	9606	See mage-tab files linked to series entry for additional details	See mage-tab files linked to series entry for additional details	See mage-tab files linked to series entry for additional details	GPL96	Mervi,,Heiskanen	mervi.heiskanen@nih.gov	2402765175	CBIIT	NCI	9609 Medical Center Drive, 1W378	Rockville	MD	20850	USA	ftp://ftp.ncbi.nlm.nih.gov/geo/samples/GSM1672nnn/GSM1672356/suppl/GSM1672356_NCI_Lung_79_U133A.CEL.gz	ftp://ftp.ncbi.nlm.nih.gov/geo/samples/GSM1672nnn/GSM1672356/suppl/GSM1672356_NCI_Lung_79_U133A.mas5.CHP.gz	22283
GSM1672357	Public on May 02 2015	May 01 2015	May 02 2015	RNA	1	MI	Homo sapiens	disease_state: Lung Adenocarcinoma	Sex: Female	age: 81	race: Not Reported	vital_status: Alive	clinical_treatment_adjuvant_chemo: Yes	clinical_treatment_adjuvant_rt: Yes	disease_stage: pN1pT2	first_progression_or_relapse: No	months_to_first_progression: --	mths_to_last_clinical_assessment: 32.9	months_to_last_contact_or_death: 32.9	smoking_history: Never smoked	surgical_margins: ALL MARGINS PATHOLOGICALLY NEGATIVE	organism_part: Lung	histologic_grade: Moderate Differentiation	total RNA	See mage-tab files linked to series entry for additional details	biotin	See mage-tab files linked to series entry for additional details	9606	See mage-tab files linked to series entry for additional details	See mage-tab files linked to series entry for additional details	See mage-tab files linked to series entry for additional details	GPL96	Mervi,,Heiskanen	mervi.heiskanen@nih.gov	2402765175	CBIIT	NCI	9609 Medical Center Drive, 1W378	Rockville	MD	20850	USA	ftp://ftp.ncbi.nlm.nih.gov/geo/samples/GSM1672nnn/GSM1672357/suppl/GSM1672357_NCI_Lung_80_U133A.CEL.gz	ftp://ftp.ncbi.nlm.nih.gov/geo/samples/GSM1672nnn/GSM1672357/suppl/GSM1672357_NCI_Lung_80_U133A.mas5.CHP.gz	22283
GSM1672358	Public on May 02 2015	May 01 2015	May 02 2015	RNA	1	MI	Homo sapiens	disease_state: Lung Adenocarcinoma	Sex: Female	age: 57	race: Not Reported	vital_status: Alive	clinical_treatment_adjuvant_chemo: No	clinical_treatment_adjuvant_rt: No	disease_stage: pN0pT1	first_progression_or_relapse: No	months_to_first_progression: --	mths_to_last_clinical_assessment: 38.1	months_to_last_contact_or_death: 38.1	smoking_history: Never smoked	surgical_margins: ALL MARGINS PATHOLOGICALLY NEGATIVE	organism_part: Lung	histologic_grade: POORLY DIFFERENTIATED	total RNA	See mage-tab files linked to series entry for additional details	biotin	See mage-tab files linked to series entry for additional details	9606	See mage-tab files linked to series entry for additional details	See mage-tab files linked to series entry for additional details	See mage-tab files linked to series entry for additional details	GPL96	Mervi,,Heiskanen	mervi.heiskanen@nih.gov	2402765175	CBIIT	NCI	9609 Medical Center Drive, 1W378	Rockville	MD	20850	USA	ftp://ftp.ncbi.nlm.nih.gov/geo/samples/GSM1672nnn/GSM1672358/suppl/GSM1672358_NCI_Lung_81_U133A.CEL.gz	ftp://ftp.ncbi.nlm.nih.gov/geo/samples/GSM1672nnn/GSM1672358/suppl/GSM1672358_NCI_Lung_81_U133A.mas5.CHP.gz	22283
GSM1672359	Public on May 02 2015	May 01 2015	May 02 2015	RNA	1	MI	Homo sapiens	disease_state: Lung Adenocarcinoma	Sex: Female	age: 76	race: Not Reported	vital_status: Dead	clinical_treatment_adjuvant_chemo: Yes	clinical_treatment_adjuvant_rt: Yes	disease_stage: pN0pT1	first_progression_or_relapse: Yes	months_to_first_progression: 27	mths_to_last_clinical_assessment: 54.2	months_to_last_contact_or_death: 54.2	smoking_history: Never smoked	surgical_margins: ALL MARGINS PATHOLOGICALLY NEGATIVE	organism_part: Lung	histologic_grade: Moderate Differentiation	total RNA	See mage-tab files linked to series entry for additional details	biotin	See mage-tab files linked to series entry for additional details	9606	See mage-tab files linked to series entry for additional details	See mage-tab files linked to series entry for additional details	See mage-tab files linked to series entry for additional details	GPL96	Mervi,,Heiskanen	mervi.heiskanen@nih.gov	2402765175	CBIIT	NCI	9609 Medical Center Drive, 1W378	Rockville	MD	20850	USA	ftp://ftp.ncbi.nlm.nih.gov/geo/samples/GSM1672nnn/GSM1672359/suppl/GSM1672359_NCI_Lung_82_U133A.CEL.gz	ftp://ftp.ncbi.nlm.nih.gov/geo/samples/GSM1672nnn/GSM1672359/suppl/GSM1672359_NCI_Lung_82_U133A.mas5.CHP.gz	22283
GSM1672360	Public on May 02 2015	May 01 2015	May 02 2015	RNA	1	MI	Homo sapiens	disease_state: Lung Adenocarcinoma	Sex: Female	age: 60	race: White	vital_status: Dead	clinical_treatment_adjuvant_chemo: Yes	clinical_treatment_adjuvant_rt: Yes	disease_stage: pN1pT1	first_progression_or_relapse: Yes	months_to_first_progression: 52	mths_to_last_clinical_assessment: --	months_to_last_contact_or_death: 96.1	smoking_history: Smoked in the past	surgical_margins: ALL MARGINS PATHOLOGICALLY NEGATIVE	organism_part: Lung	histologic_grade: Moderate Differentiation	total RNA	See mage-tab files linked to series entry for additional details	biotin	See mage-tab files linked to series entry for additional details	9606	See mage-tab files linked to series entry for additional details	See mage-tab files linked to series entry for additional details	See mage-tab files linked to series entry for additional details	GPL96	Mervi,,Heiskanen	mervi.heiskanen@nih.gov	2402765175	CBIIT	NCI	9609 Medical Center Drive, 1W378	Rockville	MD	20850	USA	ftp://ftp.ncbi.nlm.nih.gov/geo/samples/GSM1672nnn/GSM1672360/suppl/GSM1672360_NCI_Lung_83_U133A.CEL.gz	ftp://ftp.ncbi.nlm.nih.gov/geo/samples/GSM1672nnn/GSM1672360/suppl/GSM1672360_NCI_Lung_83_U133A.mas5.CHP.gz	22283
GSM1672361	Public on May 02 2015	May 01 2015	May 02 2015	RNA	1	MI	Homo sapiens	disease_state: Lung Adenocarcinoma	Sex: Female	age: 62	race: White	vital_status: Alive	clinical_treatment_adjuvant_chemo: No	clinical_treatment_adjuvant_rt: No	disease_stage: pN0pT1	first_progression_or_relapse: Yes	months_to_first_progression: 10	mths_to_last_clinical_assessment: 53.2	months_to_last_contact_or_death: 53.2	smoking_history: Smoked in the past	surgical_margins: ALL MARGINS PATHOLOGICALLY NEGATIVE	organism_part: Lung	histologic_grade: Moderate Differentiation	total RNA	See mage-tab files linked to series entry for additional details	biotin	See mage-tab files linked to series entry for additional details	9606	See mage-tab files linked to series entry for additional details	See mage-tab files linked to series entry for additional details	See mage-tab files linked to series entry for additional details	GPL96	Mervi,,Heiskanen	mervi.heiskanen@nih.gov	2402765175	CBIIT	NCI	9609 Medical Center Drive, 1W378	Rockville	MD	20850	USA	ftp://ftp.ncbi.nlm.nih.gov/geo/samples/GSM1672nnn/GSM1672361/suppl/GSM1672361_NCI_Lung_84_U133A.CEL.gz	ftp://ftp.ncbi.nlm.nih.gov/geo/samples/GSM1672nnn/GSM1672361/suppl/GSM1672361_NCI_Lung_84_U133A.mas5.CHP.gz	22283
GSM1672362	Public on May 02 2015	May 01 2015	May 02 2015	RNA	1	MI	Homo sapiens	disease_state: Lung Adenocarcinoma	Sex: Male	age: 68	race: White	vital_status: Dead	clinical_treatment_adjuvant_chemo: No	clinical_treatment_adjuvant_rt: No	disease_stage: pN1pT2	first_progression_or_relapse: No	months_to_first_progression: --	mths_to_last_clinical_assessment: 12.47	months_to_last_contact_or_death: 12.5	smoking_history: Smoked in the past	surgical_margins: ALL MARGINS PATHOLOGICALLY NEGATIVE	organism_part: Lung	histologic_grade: WELL DIFFERENTIATED	total RNA	See mage-tab files linked to series entry for additional details	biotin	See mage-tab files linked to series entry for additional details	9606	See mage-tab files linked to series entry for additional details	See mage-tab files linked to series entry for additional details	See mage-tab files linked to series entry for additional details	GPL96	Mervi,,Heiskanen	mervi.heiskanen@nih.gov	2402765175	CBIIT	NCI	9609 Medical Center Drive, 1W378	Rockville	MD	20850	USA	ftp://ftp.ncbi.nlm.nih.gov/geo/samples/GSM1672nnn/GSM1672362/suppl/GSM1672362_NCI_Lung_85_U133A.CEL.gz	ftp://ftp.ncbi.nlm.nih.gov/geo/samples/GSM1672nnn/GSM1672362/suppl/GSM1672362_NCI_Lung_85_U133A.mas5.CHP.gz	22283
GSM1672363	Public on May 02 2015	May 01 2015	May 02 2015	RNA	1	MI	Homo sapiens	disease_state: Lung Adenocarcinoma	Sex: Male	age: 73	race: Not Reported	vital_status: Alive	clinical_treatment_adjuvant_chemo: No	clinical_treatment_adjuvant_rt: No	disease_stage: pN0pT1	first_progression_or_relapse: No	months_to_first_progression: --	mths_to_last_clinical_assessment: 29.5	months_to_last_contact_or_death: 29.5	smoking_history: Smoked in the past	surgical_margins: ALL MARGINS PATHOLOGICALLY NEGATIVE	organism_part: Lung	histologic_grade: WELL DIFFERENTIATED	total RNA	See mage-tab files linked to series entry for additional details	biotin	See mage-tab files linked to series entry for additional details	9606	See mage-tab files linked to series entry for additional details	See mage-tab files linked to series entry for additional details	See mage-tab files linked to series entry for additional details	GPL96	Mervi,,Heiskanen	mervi.heiskanen@nih.gov	2402765175	CBIIT	NCI	9609 Medical Center Drive, 1W378	Rockville	MD	20850	USA	ftp://ftp.ncbi.nlm.nih.gov/geo/samples/GSM1672nnn/GSM1672363/suppl/GSM1672363_NCI_Lung_86_U133A.CEL.gz	ftp://ftp.ncbi.nlm.nih.gov/geo/samples/GSM1672nnn/GSM1672363/suppl/GSM1672363_NCI_Lung_86_U133A.mas5.CHP.gz	22283
GSM1672364	Public on May 02 2015	May 01 2015	May 02 2015	RNA	1	MI	Homo sapiens	disease_state: Lung Adenocarcinoma	Sex: Female	age: 65	race: White	vital_status: Alive	clinical_treatment_adjuvant_chemo: No	clinical_treatment_adjuvant_rt: No	disease_stage: pN1pT1	first_progression_or_relapse: No	months_to_first_progression: --	mths_to_last_clinical_assessment: 107.5	months_to_last_contact_or_death: 107.5	smoking_history: Smoked in the past	surgical_margins: ALL MARGINS PATHOLOGICALLY NEGATIVE	organism_part: Lung	histologic_grade: POORLY DIFFERENTIATED	total RNA	See mage-tab files linked to series entry for additional details	biotin	See mage-tab files linked to series entry for additional details	9606	See mage-tab files linked to series entry for additional details	See mage-tab files linked to series entry for additional details	See mage-tab files linked to series entry for additional details	GPL96	Mervi,,Heiskanen	mervi.heiskanen@nih.gov	2402765175	CBIIT	NCI	9609 Medical Center Drive, 1W378	Rockville	MD	20850	USA	ftp://ftp.ncbi.nlm.nih.gov/geo/samples/GSM1672nnn/GSM1672364/suppl/GSM1672364_NCI_Lung_89_U133A.CEL.gz	ftp://ftp.ncbi.nlm.nih.gov/geo/samples/GSM1672nnn/GSM1672364/suppl/GSM1672364_NCI_Lung_89_U133A.mas5.CHP.gz	22283
GSM1672365	Public on May 02 2015	May 01 2015	May 02 2015	RNA	1	MI	Homo sapiens	disease_state: Lung Adenocarcinoma	Sex: Male	age: 63	race: White	vital_status: Alive	clinical_treatment_adjuvant_chemo: No	clinical_treatment_adjuvant_rt: No	disease_stage: pN0pT2	first_progression_or_relapse: No	months_to_first_progression: --	mths_to_last_clinical_assessment: 53.7	months_to_last_contact_or_death: 53.7	smoking_history: Smoked in the past	surgical_margins: ALL MARGINS PATHOLOGICALLY NEGATIVE	organism_part: Lung	histologic_grade: POORLY DIFFERENTIATED	total RNA	See mage-tab files linked to series entry for additional details	biotin	See mage-tab files linked to series entry for additional details	9606	See mage-tab files linked to series entry for additional details	See mage-tab files linked to series entry for additional details	See mage-tab files linked to series entry for additional details	GPL96	Mervi,,Heiskanen	mervi.heiskanen@nih.gov	2402765175	CBIIT	NCI	9609 Medical Center Drive, 1W378	Rockville	MD	20850	USA	ftp://ftp.ncbi.nlm.nih.gov/geo/samples/GSM1672nnn/GSM1672365/suppl/GSM1672365_NCI_Lung_90_U133A.CEL.gz	ftp://ftp.ncbi.nlm.nih.gov/geo/samples/GSM1672nnn/GSM1672365/suppl/GSM1672365_NCI_Lung_90_U133A.mas5.CHP.gz	22283
GSM1672366	Public on May 02 2015	May 01 2015	May 02 2015	RNA	1	MI	Homo sapiens	disease_state: Lung Adenocarcinoma	Sex: Male	age: 70	race: White	vital_status: Alive	clinical_treatment_adjuvant_chemo: No	clinical_treatment_adjuvant_rt: No	disease_stage: pN0pT1	first_progression_or_relapse: No	months_to_first_progression: --	mths_to_last_clinical_assessment: 21.8	months_to_last_contact_or_death: 21.8	smoking_history: Smoked in the past	surgical_margins: ALL MARGINS PATHOLOGICALLY NEGATIVE	organism_part: Lung	histologic_grade: WELL DIFFERENTIATED	total RNA	See mage-tab files linked to series entry for additional details	biotin	See mage-tab files linked to series entry for additional details	9606	See mage-tab files linked to series entry for additional details	See mage-tab files linked to series entry for additional details	See mage-tab files linked to series entry for additional details	GPL96	Mervi,,Heiskanen	mervi.heiskanen@nih.gov	2402765175	CBIIT	NCI	9609 Medical Center Drive, 1W378	Rockville	MD	20850	USA	ftp://ftp.ncbi.nlm.nih.gov/geo/samples/GSM1672nnn/GSM1672366/suppl/GSM1672366_NCI_Lung_91_U133A.CEL.gz	ftp://ftp.ncbi.nlm.nih.gov/geo/samples/GSM1672nnn/GSM1672366/suppl/GSM1672366_NCI_Lung_91_U133A.mas5.CHP.gz	22283
GSM1672367	Public on May 02 2015	May 01 2015	May 02 2015	RNA	1	MI	Homo sapiens	disease_state: Lung Adenocarcinoma	Sex: Male	age: 78	race: White	vital_status: Alive	clinical_treatment_adjuvant_chemo: No	clinical_treatment_adjuvant_rt: No	disease_stage: pN0pT1	first_progression_or_relapse: No	months_to_first_progression: --	mths_to_last_clinical_assessment: 55.8	months_to_last_contact_or_death: 55.8	smoking_history: Smoked in the past	surgical_margins: ALL MARGINS PATHOLOGICALLY NEGATIVE	organism_part: Lung	histologic_grade: POORLY DIFFERENTIATED	total RNA	See mage-tab files linked to series entry for additional details	biotin	See mage-tab files linked to series entry for additional details	9606	See mage-tab files linked to series entry for additional details	See mage-tab files linked to series entry for additional details	See mage-tab files linked to series entry for additional details	GPL96	Mervi,,Heiskanen	mervi.heiskanen@nih.gov	2402765175	CBIIT	NCI	9609 Medical Center Drive, 1W378	Rockville	MD	20850	USA	ftp://ftp.ncbi.nlm.nih.gov/geo/samples/GSM1672nnn/GSM1672367/suppl/GSM1672367_NCI_Lung_92_U133A.CEL.gz	ftp://ftp.ncbi.nlm.nih.gov/geo/samples/GSM1672nnn/GSM1672367/suppl/GSM1672367_NCI_Lung_92_U133A.mas5.CHP.gz	22283
GSM1672368	Public on May 02 2015	May 01 2015	May 02 2015	RNA	1	MI	Homo sapiens	disease_state: Lung Adenocarcinoma	Sex: Male	age: 54	race: White	vital_status: Dead	clinical_treatment_adjuvant_chemo: No	clinical_treatment_adjuvant_rt: No	disease_stage: pN1pT2	first_progression_or_relapse: Yes	months_to_first_progression: --	mths_to_last_clinical_assessment: --	months_to_last_contact_or_death: 21	smoking_history: Smoked in the past	surgical_margins: ALL MARGINS PATHOLOGICALLY NEGATIVE	organism_part: Lung	histologic_grade: Moderate Differentiation	total RNA	See mage-tab files linked to series entry for additional details	biotin	See mage-tab files linked to series entry for additional details	9606	See mage-tab files linked to series entry for additional details	See mage-tab files linked to series entry for additional details	See mage-tab files linked to series entry for additional details	GPL96	Mervi,,Heiskanen	mervi.heiskanen@nih.gov	2402765175	CBIIT	NCI	9609 Medical Center Drive, 1W378	Rockville	MD	20850	USA	ftp://ftp.ncbi.nlm.nih.gov/geo/samples/GSM1672nnn/GSM1672368/suppl/GSM1672368_NCI_Lung_93_U133A.CEL.gz	ftp://ftp.ncbi.nlm.nih.gov/geo/samples/GSM1672nnn/GSM1672368/suppl/GSM1672368_NCI_Lung_93_U133A.mas5.CHP.gz	22283
GSM1672369	Public on May 02 2015	May 01 2015	May 02 2015	RNA	1	MI	Homo sapiens	disease_state: Lung Adenocarcinoma	Sex: Male	age: 78	race: White	vital_status: Dead	clinical_treatment_adjuvant_chemo: No	clinical_treatment_adjuvant_rt: No	disease_stage: pN1pT1	first_progression_or_relapse: No	months_to_first_progression: --	mths_to_last_clinical_assessment: --	months_to_last_contact_or_death: 7.3	smoking_history: Smoked in the past	surgical_margins: ALL MARGINS PATHOLOGICALLY NEGATIVE	organism_part: Lung	histologic_grade: Moderate Differentiation	total RNA	See mage-tab files linked to series entry for additional details	biotin	See mage-tab files linked to series entry for additional details	9606	See mage-tab files linked to series entry for additional details	See mage-tab files linked to series entry for additional details	See mage-tab files linked to series entry for additional details	GPL96	Mervi,,Heiskanen	mervi.heiskanen@nih.gov	2402765175	CBIIT	NCI	9609 Medical Center Drive, 1W378	Rockville	MD	20850	USA	ftp://ftp.ncbi.nlm.nih.gov/geo/samples/GSM1672nnn/GSM1672369/suppl/GSM1672369_NCI_Lung_95_U133A.CEL.gz	ftp://ftp.ncbi.nlm.nih.gov/geo/samples/GSM1672nnn/GSM1672369/suppl/GSM1672369_NCI_Lung_95_U133A.mas5.CHP.gz	22283
GSM1672370	Public on May 02 2015	May 01 2015	May 02 2015	RNA	1	MI	Homo sapiens	disease_state: Lung Adenocarcinoma	Sex: Male	age: 66	race: White	vital_status: Alive	clinical_treatment_adjuvant_chemo: No	clinical_treatment_adjuvant_rt: No	disease_stage: pN0pT2	first_progression_or_relapse: No	months_to_first_progression: --	mths_to_last_clinical_assessment: 159.9	months_to_last_contact_or_death: 159.9	smoking_history: Unknown	surgical_margins: ALL MARGINS PATHOLOGICALLY NEGATIVE	organism_part: Lung	histologic_grade: Moderate Differentiation	total RNA	See mage-tab files linked to series entry for additional details	biotin	See mage-tab files linked to series entry for additional details	9606	See mage-tab files linked to series entry for additional details	See mage-tab files linked to series entry for additional details	See mage-tab files linked to series entry for additional details	GPL96	Mervi,,Heiskanen	mervi.heiskanen@nih.gov	2402765175	CBIIT	NCI	9609 Medical Center Drive, 1W378	Rockville	MD	20850	USA	ftp://ftp.ncbi.nlm.nih.gov/geo/samples/GSM1672nnn/GSM1672370/suppl/GSM1672370_NCI_Lung_96_U133A.CEL.gz	ftp://ftp.ncbi.nlm.nih.gov/geo/samples/GSM1672nnn/GSM1672370/suppl/GSM1672370_NCI_Lung_96_U133A.mas5.CHP.gz	22283
GSM1672371	Public on May 02 2015	May 01 2015	May 02 2015	RNA	1	MI	Homo sapiens	disease_state: Lung Adenocarcinoma	Sex: Male	age: 72	race: White	vital_status: Alive	clinical_treatment_adjuvant_chemo: No	clinical_treatment_adjuvant_rt: No	disease_stage: pN0pT1	first_progression_or_relapse: No	months_to_first_progression: --	mths_to_last_clinical_assessment: 60.8	months_to_last_contact_or_death: 60.8	smoking_history: Smoked in the past	surgical_margins: ALL MARGINS PATHOLOGICALLY NEGATIVE	organism_part: Lung	histologic_grade: Moderate Differentiation	total RNA	See mage-tab files linked to series entry for additional details	biotin	See mage-tab files linked to series entry for additional details	9606	See mage-tab files linked to series entry for additional details	See mage-tab files linked to series entry for additional details	See mage-tab files linked to series entry for additional details	GPL96	Mervi,,Heiskanen	mervi.heiskanen@nih.gov	2402765175	CBIIT	NCI	9609 Medical Center Drive, 1W378	Rockville	MD	20850	USA	ftp://ftp.ncbi.nlm.nih.gov/geo/samples/GSM1672nnn/GSM1672371/suppl/GSM1672371_NCI_Lung_97_U133A.CEL.gz	ftp://ftp.ncbi.nlm.nih.gov/geo/samples/GSM1672nnn/GSM1672371/suppl/GSM1672371_NCI_Lung_97_U133A.mas5.CHP.gz	22283
GSM1672372	Public on May 02 2015	May 01 2015	May 02 2015	RNA	1	MI	Homo sapiens	disease_state: Lung Adenocarcinoma	Sex: Female	age: 81	race: White	vital_status: Dead	clinical_treatment_adjuvant_chemo: No	clinical_treatment_adjuvant_rt: No	disease_stage: pN0pT1	first_progression_or_relapse: Yes	months_to_first_progression: 8	mths_to_last_clinical_assessment: 21.17	months_to_last_contact_or_death: 21.2	smoking_history: Never smoked	surgical_margins: ALL MARGINS PATHOLOGICALLY NEGATIVE	organism_part: Lung	histologic_grade: WELL DIFFERENTIATED	total RNA	See mage-tab files linked to series entry for additional details	biotin	See mage-tab files linked to series entry for additional details	9606	See mage-tab files linked to series entry for additional details	See mage-tab files linked to series entry for additional details	See mage-tab files linked to series entry for additional details	GPL96	Mervi,,Heiskanen	mervi.heiskanen@nih.gov	2402765175	CBIIT	NCI	9609 Medical Center Drive, 1W378	Rockville	MD	20850	USA	ftp://ftp.ncbi.nlm.nih.gov/geo/samples/GSM1672nnn/GSM1672372/suppl/GSM1672372_NCI_Lung_98_U133A.CEL.gz	ftp://ftp.ncbi.nlm.nih.gov/geo/samples/GSM1672nnn/GSM1672372/suppl/GSM1672372_NCI_Lung_98_U133A.mas5.CHP.gz	22283
GSM1672373	Public on May 02 2015	May 01 2015	May 02 2015	RNA	1	MI	Homo sapiens	disease_state: Lung Adenocarcinoma	Sex: Female	age: 69	race: White	vital_status: Alive	clinical_treatment_adjuvant_chemo: Yes	clinical_treatment_adjuvant_rt: Yes	disease_stage: pN0pT2	first_progression_or_relapse: Yes	months_to_first_progression: 46	mths_to_last_clinical_assessment: 53.6	months_to_last_contact_or_death: 53.6	smoking_history: Never smoked	surgical_margins: ALL MARGINS PATHOLOGICALLY NEGATIVE	organism_part: Lung	histologic_grade: WELL DIFFERENTIATED	total RNA	See mage-tab files linked to series entry for additional details	biotin	See mage-tab files linked to series entry for additional details	9606	See mage-tab files linked to series entry for additional details	See mage-tab files linked to series entry for additional details	See mage-tab files linked to series entry for additional details	GPL96	Mervi,,Heiskanen	mervi.heiskanen@nih.gov	2402765175	CBIIT	NCI	9609 Medical Center Drive, 1W378	Rockville	MD	20850	USA	ftp://ftp.ncbi.nlm.nih.gov/geo/samples/GSM1672nnn/GSM1672373/suppl/GSM1672373_NCI_Lung_99_U133A.CEL.gz	ftp://ftp.ncbi.nlm.nih.gov/geo/samples/GSM1672nnn/GSM1672373/suppl/GSM1672373_NCI_Lung_99_U133A.mas5.CHP.gz	22283
GSM1672374	Public on May 02 2015	May 01 2015	May 02 2015	RNA	1	MI	Homo sapiens	disease_state: Lung Adenocarcinoma	Sex: Male	age: 59	race: White	vital_status: Alive	clinical_treatment_adjuvant_chemo: No	clinical_treatment_adjuvant_rt: No	disease_stage: pN2pT3	first_progression_or_relapse: No	months_to_first_progression: --	mths_to_last_clinical_assessment: 23.2	months_to_last_contact_or_death: 23.2	smoking_history: Smoked in the past	surgical_margins: ALL MARGINS PATHOLOGICALLY NEGATIVE	organism_part: Lung	histologic_grade: Moderate Differentiation	total RNA	See mage-tab files linked to series entry for additional details	biotin	See mage-tab files linked to series entry for additional details	9606	See mage-tab files linked to series entry for additional details	See mage-tab files linked to series entry for additional details	See mage-tab files linked to series entry for additional details	GPL96	Mervi,,Heiskanen	mervi.heiskanen@nih.gov	2402765175	CBIIT	NCI	9609 Medical Center Drive, 1W378	Rockville	MD	20850	USA	ftp://ftp.ncbi.nlm.nih.gov/geo/samples/GSM1672nnn/GSM1672374/suppl/GSM1672374_NCI_Lung_100_U133A.CEL.gz	ftp://ftp.ncbi.nlm.nih.gov/geo/samples/GSM1672nnn/GSM1672374/suppl/GSM1672374_NCI_Lung_100_U133A.mas5.CHP.gz	22283
GSM1672375	Public on May 02 2015	May 01 2015	May 02 2015	RNA	1	MI	Homo sapiens	disease_state: Lung Adenocarcinoma	Sex: Female	age: 76	race: White	vital_status: Alive	clinical_treatment_adjuvant_chemo: No	clinical_treatment_adjuvant_rt: No	disease_stage: pN0pT2	first_progression_or_relapse: --	months_to_first_progression: --	mths_to_last_clinical_assessment: 47.27	months_to_last_contact_or_death: 47.27	smoking_history: Unknown	surgical_margins: ALL MARGINS PATHOLOGICALLY NEGATIVE	organism_part: Lung	histologic_grade: POORLY DIFFERENTIATED	total RNA	See mage-tab files linked to series entry for additional details	biotin	See mage-tab files linked to series entry for additional details	9606	See mage-tab files linked to series entry for additional details	See mage-tab files linked to series entry for additional details	See mage-tab files linked to series entry for additional details	GPL96	Mervi,,Heiskanen	mervi.heiskanen@nih.gov	2402765175	CBIIT	NCI	9609 Medical Center Drive, 1W378	Rockville	MD	20850	USA	ftp://ftp.ncbi.nlm.nih.gov/geo/samples/GSM1672nnn/GSM1672375/suppl/GSM1672375_NCI_lung201_U133A.CEL.gz	ftp://ftp.ncbi.nlm.nih.gov/geo/samples/GSM1672nnn/GSM1672375/suppl/GSM1672375_NCI_lung201_U133A.mas5.CHP.gz	22283
GSM1672376	Public on May 02 2015	May 01 2015	May 02 2015	RNA	1	MI	Homo sapiens	disease_state: Lung Adenocarcinoma	Sex: Male	age: 70	race: White	vital_status: Dead	clinical_treatment_adjuvant_chemo: No	clinical_treatment_adjuvant_rt: No	disease_stage: pN0pT2	first_progression_or_relapse: --	months_to_first_progression: --	mths_to_last_clinical_assessment: 59.11	months_to_last_contact_or_death: 59.11	smoking_history: Unknown	surgical_margins: ALL MARGINS PATHOLOGICALLY NEGATIVE	organism_part: Lung	histologic_grade: Moderate Differentiation	total RNA	See mage-tab files linked to series entry for additional details	biotin	See mage-tab files linked to series entry for additional details	9606	See mage-tab files linked to series entry for additional details	See mage-tab files linked to series entry for additional details	See mage-tab files linked to series entry for additional details	GPL96	Mervi,,Heiskanen	mervi.heiskanen@nih.gov	2402765175	CBIIT	NCI	9609 Medical Center Drive, 1W378	Rockville	MD	20850	USA	ftp://ftp.ncbi.nlm.nih.gov/geo/samples/GSM1672nnn/GSM1672376/suppl/GSM1672376_NCI_lung202_U133A.CEL.gz	ftp://ftp.ncbi.nlm.nih.gov/geo/samples/GSM1672nnn/GSM1672376/suppl/GSM1672376_NCI_lung202_U133A.mas5.CHP.gz	22283
GSM1672377	Public on May 02 2015	May 01 2015	May 02 2015	RNA	1	MI	Homo sapiens	disease_state: Lung Adenocarcinoma	Sex: Male	age: 58	race: White	vital_status: Alive	clinical_treatment_adjuvant_chemo: No	clinical_treatment_adjuvant_rt: No	disease_stage: pN0pT2	first_progression_or_relapse: --	months_to_first_progression: --	mths_to_last_clinical_assessment: 51.58	months_to_last_contact_or_death: 51.58	smoking_history: Unknown	surgical_margins: ALL MARGINS PATHOLOGICALLY NEGATIVE	organism_part: Lung	histologic_grade: POORLY DIFFERENTIATED	total RNA	See mage-tab files linked to series entry for additional details	biotin	See mage-tab files linked to series entry for additional details	9606	See mage-tab files linked to series entry for additional details	See mage-tab files linked to series entry for additional details	See mage-tab files linked to series entry for additional details	GPL96	Mervi,,Heiskanen	mervi.heiskanen@nih.gov	2402765175	CBIIT	NCI	9609 Medical Center Drive, 1W378	Rockville	MD	20850	USA	ftp://ftp.ncbi.nlm.nih.gov/geo/samples/GSM1672nnn/GSM1672377/suppl/GSM1672377_NCI_lung203_U133A.CEL.gz	ftp://ftp.ncbi.nlm.nih.gov/geo/samples/GSM1672nnn/GSM1672377/suppl/GSM1672377_NCI_lung203_U133A.mas5.CHP.gz	22283
GSM1672378	Public on May 02 2015	May 01 2015	May 02 2015	RNA	1	MI	Homo sapiens	disease_state: Lung Adenocarcinoma	Sex: Female	age: 48	race: White	vital_status: Dead	clinical_treatment_adjuvant_chemo: No	clinical_treatment_adjuvant_rt: No	disease_stage: pN0pT2	first_progression_or_relapse: Yes	months_to_first_progression: 19	mths_to_last_clinical_assessment: 36.25	months_to_last_contact_or_death: 36.25	smoking_history: Unknown	surgical_margins: ALL MARGINS PATHOLOGICALLY NEGATIVE	organism_part: Lung	histologic_grade: Moderate Differentiation	total RNA	See mage-tab files linked to series entry for additional details	biotin	See mage-tab files linked to series entry for additional details	9606	See mage-tab files linked to series entry for additional details	See mage-tab files linked to series entry for additional details	See mage-tab files linked to series entry for additional details	GPL96	Mervi,,Heiskanen	mervi.heiskanen@nih.gov	2402765175	CBIIT	NCI	9609 Medical Center Drive, 1W378	Rockville	MD	20850	USA	ftp://ftp.ncbi.nlm.nih.gov/geo/samples/GSM1672nnn/GSM1672378/suppl/GSM1672378_NCI_lung204_U133A.CEL.gz	ftp://ftp.ncbi.nlm.nih.gov/geo/samples/GSM1672nnn/GSM1672378/suppl/GSM1672378_NCI_lung204_U133A.mas5.CHP.gz	22283
GSM1672379	Public on May 02 2015	May 01 2015	May 02 2015	RNA	1	MI	Homo sapiens	disease_state: Lung Adenocarcinoma	Sex: Male	age: 82	race: White	vital_status: Dead	clinical_treatment_adjuvant_chemo: No	clinical_treatment_adjuvant_rt: No	disease_stage: pN0pT3	first_progression_or_relapse: --	months_to_first_progression: --	mths_to_last_clinical_assessment: 6.6	months_to_last_contact_or_death: 6.6	smoking_history: Unknown	surgical_margins: MICROSCOPICALLY POSITIVE MARGINS OR MICROSCOPIC RESIDUAL DISEASE	organism_part: Lung	histologic_grade: Moderate Differentiation	total RNA	See mage-tab files linked to series entry for additional details	biotin	See mage-tab files linked to series entry for additional details	9606	See mage-tab files linked to series entry for additional details	See mage-tab files linked to series entry for additional details	See mage-tab files linked to series entry for additional details	GPL96	Mervi,,Heiskanen	mervi.heiskanen@nih.gov	2402765175	CBIIT	NCI	9609 Medical Center Drive, 1W378	Rockville	MD	20850	USA	ftp://ftp.ncbi.nlm.nih.gov/geo/samples/GSM1672nnn/GSM1672379/suppl/GSM1672379_NCI_lung205_U133A.CEL.gz	ftp://ftp.ncbi.nlm.nih.gov/geo/samples/GSM1672nnn/GSM1672379/suppl/GSM1672379_NCI_lung205_U133A.mas5.CHP.gz	22283
GSM1672380	Public on May 02 2015	May 01 2015	May 02 2015	RNA	1	MI	Homo sapiens	disease_state: Lung Adenocarcinoma	Sex: Male	age: 62	race: White	vital_status: Dead	clinical_treatment_adjuvant_chemo: No	clinical_treatment_adjuvant_rt: No	disease_stage: pN0pT1	first_progression_or_relapse: Yes	months_to_first_progression: 9.6	mths_to_last_clinical_assessment: 54.93	months_to_last_contact_or_death: 54.93	smoking_history: Unknown	surgical_margins: ALL MARGINS PATHOLOGICALLY NEGATIVE	organism_part: Lung	histologic_grade: Moderate Differentiation	total RNA	See mage-tab files linked to series entry for additional details	biotin	See mage-tab files linked to series entry for additional details	9606	See mage-tab files linked to series entry for additional details	See mage-tab files linked to series entry for additional details	See mage-tab files linked to series entry for additional details	GPL96	Mervi,,Heiskanen	mervi.heiskanen@nih.gov	2402765175	CBIIT	NCI	9609 Medical Center Drive, 1W378	Rockville	MD	20850	USA	ftp://ftp.ncbi.nlm.nih.gov/geo/samples/GSM1672nnn/GSM1672380/suppl/GSM1672380_NCI_lung206_U133A.CEL.gz	ftp://ftp.ncbi.nlm.nih.gov/geo/samples/GSM1672nnn/GSM1672380/suppl/GSM1672380_NCI_lung206_U133A.mas5.CHP.gz	22283
GSM1672381	Public on May 02 2015	May 01 2015	May 02 2015	RNA	1	MI	Homo sapiens	disease_state: Lung Adenocarcinoma	Sex: Male	age: 82	race: White	vital_status: Dead	clinical_treatment_adjuvant_chemo: No	clinical_treatment_adjuvant_rt: No	disease_stage: pN0pT4	first_progression_or_relapse: --	months_to_first_progression: --	mths_to_last_clinical_assessment: 9.74	months_to_last_contact_or_death: 9.74	smoking_history: Unknown	surgical_margins: ALL MARGINS PATHOLOGICALLY NEGATIVE	organism_part: Lung	histologic_grade: WELL DIFFERENTIATED	total RNA	See mage-tab files linked to series entry for additional details	biotin	See mage-tab files linked to series entry for additional details	9606	See mage-tab files linked to series entry for additional details	See mage-tab files linked to series entry for additional details	See mage-tab files linked to series entry for additional details	GPL96	Mervi,,Heiskanen	mervi.heiskanen@nih.gov	2402765175	CBIIT	NCI	9609 Medical Center Drive, 1W378	Rockville	MD	20850	USA	ftp://ftp.ncbi.nlm.nih.gov/geo/samples/GSM1672nnn/GSM1672381/suppl/GSM1672381_NCI_lung207_U133A.CEL.gz	ftp://ftp.ncbi.nlm.nih.gov/geo/samples/GSM1672nnn/GSM1672381/suppl/GSM1672381_NCI_lung207_U133A.mas5.CHP.gz	22283
GSM1672382	Public on May 02 2015	May 01 2015	May 02 2015	RNA	1	MI	Homo sapiens	disease_state: Lung Adenocarcinoma	Sex: Male	age: 68	race: White	vital_status: Alive	clinical_treatment_adjuvant_chemo: No	clinical_treatment_adjuvant_rt: No	disease_stage: pN0pT1	first_progression_or_relapse: --	months_to_first_progression: --	mths_to_last_clinical_assessment: 58.88	months_to_last_contact_or_death: 58.88	smoking_history: Unknown	surgical_margins: ALL MARGINS PATHOLOGICALLY NEGATIVE	organism_part: Lung	histologic_grade: Moderate Differentiation	total RNA	See mage-tab files linked to series entry for additional details	biotin	See mage-tab files linked to series entry for additional details	9606	See mage-tab files linked to series entry for additional details	See mage-tab files linked to series entry for additional details	See mage-tab files linked to series entry for additional details	GPL96	Mervi,,Heiskanen	mervi.heiskanen@nih.gov	2402765175	CBIIT	NCI	9609 Medical Center Drive, 1W378	Rockville	MD	20850	USA	ftp://ftp.ncbi.nlm.nih.gov/geo/samples/GSM1672nnn/GSM1672382/suppl/GSM1672382_NCI_lung208_U133A.CEL.gz	ftp://ftp.ncbi.nlm.nih.gov/geo/samples/GSM1672nnn/GSM1672382/suppl/GSM1672382_NCI_lung208_U133A.mas5.CHP.gz	22283
GSM1672383	Public on May 02 2015	May 01 2015	May 02 2015	RNA	1	MI	Homo sapiens	disease_state: Lung Adenocarcinoma	Sex: Male	age: 58	race: Black or African American	vital_status: Alive	clinical_treatment_adjuvant_chemo: No	clinical_treatment_adjuvant_rt: No	disease_stage: pN0pT2	first_progression_or_relapse: --	months_to_first_progression: --	mths_to_last_clinical_assessment: 51.81	months_to_last_contact_or_death: 51.81	smoking_history: Unknown	surgical_margins: ALL MARGINS PATHOLOGICALLY NEGATIVE	organism_part: Lung	histologic_grade: Moderate Differentiation	total RNA	See mage-tab files linked to series entry for additional details	biotin	See mage-tab files linked to series entry for additional details	9606	See mage-tab files linked to series entry for additional details	See mage-tab files linked to series entry for additional details	See mage-tab files linked to series entry for additional details	GPL96	Mervi,,Heiskanen	mervi.heiskanen@nih.gov	2402765175	CBIIT	NCI	9609 Medical Center Drive, 1W378	Rockville	MD	20850	USA	ftp://ftp.ncbi.nlm.nih.gov/geo/samples/GSM1672nnn/GSM1672383/suppl/GSM1672383_NCI_lung209_U133A.CEL.gz	ftp://ftp.ncbi.nlm.nih.gov/geo/samples/GSM1672nnn/GSM1672383/suppl/GSM1672383_NCI_lung209_U133A.mas5.CHP.gz	22283
GSM1672384	Public on May 02 2015	May 01 2015	May 02 2015	RNA	1	MI	Homo sapiens	disease_state: Lung Adenocarcinoma	Sex: Male	age: 63	race: White	vital_status: Dead	clinical_treatment_adjuvant_chemo: No	clinical_treatment_adjuvant_rt: No	disease_stage: pN0pT1	first_progression_or_relapse: Yes	months_to_first_progression: 19.5	mths_to_last_clinical_assessment: 21.48	months_to_last_contact_or_death: 21.48	smoking_history: Unknown	surgical_margins: ALL MARGINS PATHOLOGICALLY NEGATIVE	organism_part: Lung	histologic_grade: Moderate Differentiation	total RNA	See mage-tab files linked to series entry for additional details	biotin	See mage-tab files linked to series entry for additional details	9606	See mage-tab files linked to series entry for additional details	See mage-tab files linked to series entry for additional details	See mage-tab files linked to series entry for additional details	GPL96	Mervi,,Heiskanen	mervi.heiskanen@nih.gov	2402765175	CBIIT	NCI	9609 Medical Center Drive, 1W378	Rockville	MD	20850	USA	ftp://ftp.ncbi.nlm.nih.gov/geo/samples/GSM1672nnn/GSM1672384/suppl/GSM1672384_NCI_lung210_U133A.CEL.gz	ftp://ftp.ncbi.nlm.nih.gov/geo/samples/GSM1672nnn/GSM1672384/suppl/GSM1672384_NCI_lung210_U133A.mas5.CHP.gz	22283
GSM1672385	Public on May 02 2015	May 01 2015	May 02 2015	RNA	1	MI	Homo sapiens	disease_state: Lung Adenocarcinoma	Sex: Male	age: 78	race: White	vital_status: Dead	clinical_treatment_adjuvant_chemo: No	clinical_treatment_adjuvant_rt: No	disease_stage: pN1pT2	first_progression_or_relapse: --	months_to_first_progression: --	mths_to_last_clinical_assessment: 6.38	months_to_last_contact_or_death: 6.38	smoking_history: Unknown	surgical_margins: ALL MARGINS PATHOLOGICALLY NEGATIVE	organism_part: Lung	histologic_grade: Moderate Differentiation	total RNA	See mage-tab files linked to series entry for additional details	biotin	See mage-tab files linked to series entry for additional details	9606	See mage-tab files linked to series entry for additional details	See mage-tab files linked to series entry for additional details	See mage-tab files linked to series entry for additional details	GPL96	Mervi,,Heiskanen	mervi.heiskanen@nih.gov	2402765175	CBIIT	NCI	9609 Medical Center Drive, 1W378	Rockville	MD	20850	USA	ftp://ftp.ncbi.nlm.nih.gov/geo/samples/GSM1672nnn/GSM1672385/suppl/GSM1672385_NCI_lung212_U133A.CEL.gz	ftp://ftp.ncbi.nlm.nih.gov/geo/samples/GSM1672nnn/GSM1672385/suppl/GSM1672385_NCI_lung212_U133A.mas5.CHP.gz	22283
GSM1672386	Public on May 02 2015	May 01 2015	May 02 2015	RNA	1	MI	Homo sapiens	disease_state: Lung Adenocarcinoma	Sex: Female	age: 57	race: Black or African American	vital_status: Dead	clinical_treatment_adjuvant_chemo: No	clinical_treatment_adjuvant_rt: No	disease_stage: pN0pT2	first_progression_or_relapse: Yes	months_to_first_progression: 25	mths_to_last_clinical_assessment: 69.01	months_to_last_contact_or_death: 69.01	smoking_history: Unknown	surgical_margins: ALL MARGINS PATHOLOGICALLY NEGATIVE	organism_part: Lung	histologic_grade: Moderate Differentiation	total RNA	See mage-tab files linked to series entry for additional details	biotin	See mage-tab files linked to series entry for additional details	9606	See mage-tab files linked to series entry for additional details	See mage-tab files linked to series entry for additional details	See mage-tab files linked to series entry for additional details	GPL96	Mervi,,Heiskanen	mervi.heiskanen@nih.gov	2402765175	CBIIT	NCI	9609 Medical Center Drive, 1W378	Rockville	MD	20850	USA	ftp://ftp.ncbi.nlm.nih.gov/geo/samples/GSM1672nnn/GSM1672386/suppl/GSM1672386_NCI_lung213_U133A.CEL.gz	ftp://ftp.ncbi.nlm.nih.gov/geo/samples/GSM1672nnn/GSM1672386/suppl/GSM1672386_NCI_lung213_U133A.mas5.CHP.gz	22283
GSM1672387	Public on May 02 2015	May 01 2015	May 02 2015	RNA	1	MI	Homo sapiens	disease_state: Lung Adenocarcinoma	Sex: Female	age: 77	race: White	vital_status: Alive	clinical_treatment_adjuvant_chemo: No	clinical_treatment_adjuvant_rt: No	disease_stage: pN0pT1	first_progression_or_relapse: Yes	months_to_first_progression: 64.14	mths_to_last_clinical_assessment: 64.14	months_to_last_contact_or_death: 64.14	smoking_history: Unknown	surgical_margins: ALL MARGINS PATHOLOGICALLY NEGATIVE	organism_part: Lung	histologic_grade: Moderate Differentiation	total RNA	See mage-tab files linked to series entry for additional details	biotin	See mage-tab files linked to series entry for additional details	9606	See mage-tab files linked to series entry for additional details	See mage-tab files linked to series entry for additional details	See mage-tab files linked to series entry for additional details	GPL96	Mervi,,Heiskanen	mervi.heiskanen@nih.gov	2402765175	CBIIT	NCI	9609 Medical Center Drive, 1W378	Rockville	MD	20850	USA	ftp://ftp.ncbi.nlm.nih.gov/geo/samples/GSM1672nnn/GSM1672387/suppl/GSM1672387_NCI_lung214_U133A.CEL.gz	ftp://ftp.ncbi.nlm.nih.gov/geo/samples/GSM1672nnn/GSM1672387/suppl/GSM1672387_NCI_lung214_U133A.mas5.CHP.gz	22283
GSM1672388	Public on May 02 2015	May 01 2015	May 02 2015	RNA	1	MI	Homo sapiens	disease_state: Lung Adenocarcinoma	Sex: Female	age: 86	race: White	vital_status: Dead	clinical_treatment_adjuvant_chemo: No	clinical_treatment_adjuvant_rt: No	disease_stage: pN0pT4	first_progression_or_relapse: Yes	months_to_first_progression: 12	mths_to_last_clinical_assessment: 32.24	months_to_last_contact_or_death: 32.24	smoking_history: Unknown	surgical_margins: MICROSCOPICALLY POSITIVE MARGINS OR MICROSCOPIC RESIDUAL DISEASE	organism_part: Lung	histologic_grade: POORLY DIFFERENTIATED	total RNA	See mage-tab files linked to series entry for additional details	biotin	See mage-tab files linked to series entry for additional details	9606	See mage-tab files linked to series entry for additional details	See mage-tab files linked to series entry for additional details	See mage-tab files linked to series entry for additional details	GPL96	Mervi,,Heiskanen	mervi.heiskanen@nih.gov	2402765175	CBIIT	NCI	9609 Medical Center Drive, 1W378	Rockville	MD	20850	USA	ftp://ftp.ncbi.nlm.nih.gov/geo/samples/GSM1672nnn/GSM1672388/suppl/GSM1672388_NCI_lung215_U133A.CEL.gz	ftp://ftp.ncbi.nlm.nih.gov/geo/samples/GSM1672nnn/GSM1672388/suppl/GSM1672388_NCI_lung215_U133A.mas5.CHP.gz	22283
GSM1672389	Public on May 02 2015	May 01 2015	May 02 2015	RNA	1	MI	Homo sapiens	disease_state: Lung Adenocarcinoma	Sex: Female	age: 78	race: White	vital_status: Alive	clinical_treatment_adjuvant_chemo: No	clinical_treatment_adjuvant_rt: No	disease_stage: pN1pT4	first_progression_or_relapse: --	months_to_first_progression: --	mths_to_last_clinical_assessment: na	months_to_last_contact_or_death: na	smoking_history: Unknown	surgical_margins: ALL MARGINS PATHOLOGICALLY NEGATIVE	organism_part: Lung	histologic_grade: POORLY DIFFERENTIATED	total RNA	See mage-tab files linked to series entry for additional details	biotin	See mage-tab files linked to series entry for additional details	9606	See mage-tab files linked to series entry for additional details	See mage-tab files linked to series entry for additional details	See mage-tab files linked to series entry for additional details	GPL96	Mervi,,Heiskanen	mervi.heiskanen@nih.gov	2402765175	CBIIT	NCI	9609 Medical Center Drive, 1W378	Rockville	MD	20850	USA	ftp://ftp.ncbi.nlm.nih.gov/geo/samples/GSM1672nnn/GSM1672389/suppl/GSM1672389_NCI_lung216_U133A.CEL.gz	ftp://ftp.ncbi.nlm.nih.gov/geo/samples/GSM1672nnn/GSM1672389/suppl/GSM1672389_NCI_lung216_U133A.mas5.CHP.gz	22283
GSM1672390	Public on May 02 2015	May 01 2015	May 02 2015	RNA	1	MI	Homo sapiens	disease_state: Lung Adenocarcinoma	Sex: Male	age: 73	race: White	vital_status: Alive	clinical_treatment_adjuvant_chemo: No	clinical_treatment_adjuvant_rt: No	disease_stage: pN0pT2	first_progression_or_relapse: --	months_to_first_progression: --	mths_to_last_clinical_assessment: 56.35	months_to_last_contact_or_death: 56.35	smoking_history: Unknown	surgical_margins: ALL MARGINS PATHOLOGICALLY NEGATIVE	organism_part: Lung	histologic_grade: POORLY DIFFERENTIATED	total RNA	See mage-tab files linked to series entry for additional details	biotin	See mage-tab files linked to series entry for additional details	9606	See mage-tab files linked to series entry for additional details	See mage-tab files linked to series entry for additional details	See mage-tab files linked to series entry for additional details	GPL96	Mervi,,Heiskanen	mervi.heiskanen@nih.gov	2402765175	CBIIT	NCI	9609 Medical Center Drive, 1W378	Rockville	MD	20850	USA	ftp://ftp.ncbi.nlm.nih.gov/geo/samples/GSM1672nnn/GSM1672390/suppl/GSM1672390_NCI_lung218_U133A.CEL.gz	ftp://ftp.ncbi.nlm.nih.gov/geo/samples/GSM1672nnn/GSM1672390/suppl/GSM1672390_NCI_lung218_U133A.mas5.CHP.gz	22283
GSM1672391	Public on May 02 2015	May 01 2015	May 02 2015	RNA	1	MI	Homo sapiens	disease_state: Lung Adenocarcinoma	Sex: Female	age: 70	race: White	vital_status: Alive	clinical_treatment_adjuvant_chemo: No	clinical_treatment_adjuvant_rt: No	disease_stage: pN0pT1	first_progression_or_relapse: --	months_to_first_progression: --	mths_to_last_clinical_assessment: 69.05	months_to_last_contact_or_death: 69.05	smoking_history: Unknown	surgical_margins: ALL MARGINS PATHOLOGICALLY NEGATIVE	organism_part: Lung	histologic_grade: Moderate Differentiation	total RNA	See mage-tab files linked to series entry for additional details	biotin	See mage-tab files linked to series entry for additional details	9606	See mage-tab files linked to series entry for additional details	See mage-tab files linked to series entry for additional details	See mage-tab files linked to series entry for additional details	GPL96	Mervi,,Heiskanen	mervi.heiskanen@nih.gov	2402765175	CBIIT	NCI	9609 Medical Center Drive, 1W378	Rockville	MD	20850	USA	ftp://ftp.ncbi.nlm.nih.gov/geo/samples/GSM1672nnn/GSM1672391/suppl/GSM1672391_NCI_lung219_U133A.CEL.gz	ftp://ftp.ncbi.nlm.nih.gov/geo/samples/GSM1672nnn/GSM1672391/suppl/GSM1672391_NCI_lung219_U133A.mas5.CHP.gz	22283
GSM1672392	Public on May 02 2015	May 01 2015	May 02 2015	RNA	1	MI	Homo sapiens	disease_state: Lung Adenocarcinoma	Sex: Female	age: 75	race: White	vital_status: Alive	clinical_treatment_adjuvant_chemo: No	clinical_treatment_adjuvant_rt: No	disease_stage: pN0pT1	first_progression_or_relapse: Yes	months_to_first_progression: 29	mths_to_last_clinical_assessment: 56.32	months_to_last_contact_or_death: 56.32	smoking_history: Unknown	surgical_margins: ALL MARGINS PATHOLOGICALLY NEGATIVE	organism_part: Lung	histologic_grade: POORLY DIFFERENTIATED	total RNA	See mage-tab files linked to series entry for additional details	biotin	See mage-tab files linked to series entry for additional details	9606	See mage-tab files linked to series entry for additional details	See mage-tab files linked to series entry for additional details	See mage-tab files linked to series entry for additional details	GPL96	Mervi,,Heiskanen	mervi.heiskanen@nih.gov	2402765175	CBIIT	NCI	9609 Medical Center Drive, 1W378	Rockville	MD	20850	USA	ftp://ftp.ncbi.nlm.nih.gov/geo/samples/GSM1672nnn/GSM1672392/suppl/GSM1672392_NCI_lung220_U133A.CEL.gz	ftp://ftp.ncbi.nlm.nih.gov/geo/samples/GSM1672nnn/GSM1672392/suppl/GSM1672392_NCI_lung220_U133A.mas5.CHP.gz	22283
GSM1672393	Public on May 02 2015	May 01 2015	May 02 2015	RNA	1	MI	Homo sapiens	disease_state: Lung Adenocarcinoma	Sex: Female	age: 49	race: White	vital_status: Alive	clinical_treatment_adjuvant_chemo: No	clinical_treatment_adjuvant_rt: No	disease_stage: pN0pT1	first_progression_or_relapse: --	months_to_first_progression: --	mths_to_last_clinical_assessment: 61.25	months_to_last_contact_or_death: 61.25	smoking_history: Unknown	surgical_margins: ALL MARGINS PATHOLOGICALLY NEGATIVE	organism_part: Lung	histologic_grade: POORLY DIFFERENTIATED	total RNA	See mage-tab files linked to series entry for additional details	biotin	See mage-tab files linked to series entry for additional details	9606	See mage-tab files linked to series entry for additional details	See mage-tab files linked to series entry for additional details	See mage-tab files linked to series entry for additional details	GPL96	Mervi,,Heiskanen	mervi.heiskanen@nih.gov	2402765175	CBIIT	NCI	9609 Medical Center Drive, 1W378	Rockville	MD	20850	USA	ftp://ftp.ncbi.nlm.nih.gov/geo/samples/GSM1672nnn/GSM1672393/suppl/GSM1672393_NCI_lung221_U133A.CEL.gz	ftp://ftp.ncbi.nlm.nih.gov/geo/samples/GSM1672nnn/GSM1672393/suppl/GSM1672393_NCI_lung221_U133A.mas5.CHP.gz	22283
GSM1672394	Public on May 02 2015	May 01 2015	May 02 2015	RNA	1	MI	Homo sapiens	disease_state: Lung Adenocarcinoma	Sex: Female	age: 51	race: White	vital_status: Alive	clinical_treatment_adjuvant_chemo: No	clinical_treatment_adjuvant_rt: No	disease_stage: pN0pT1	first_progression_or_relapse: --	months_to_first_progression: --	mths_to_last_clinical_assessment: 50.43	months_to_last_contact_or_death: 50.43	smoking_history: Unknown	surgical_margins: ALL MARGINS PATHOLOGICALLY NEGATIVE	organism_part: Lung	histologic_grade: WELL DIFFERENTIATED	total RNA	See mage-tab files linked to series entry for additional details	biotin	See mage-tab files linked to series entry for additional details	9606	See mage-tab files linked to series entry for additional details	See mage-tab files linked to series entry for additional details	See mage-tab files linked to series entry for additional details	GPL96	Mervi,,Heiskanen	mervi.heiskanen@nih.gov	2402765175	CBIIT	NCI	9609 Medical Center Drive, 1W378	Rockville	MD	20850	USA	ftp://ftp.ncbi.nlm.nih.gov/geo/samples/GSM1672nnn/GSM1672394/suppl/GSM1672394_NCI_lung222_U133A.CEL.gz	ftp://ftp.ncbi.nlm.nih.gov/geo/samples/GSM1672nnn/GSM1672394/suppl/GSM1672394_NCI_lung222_U133A.mas5.CHP.gz	22283
GSM1672395	Public on May 02 2015	May 01 2015	May 02 2015	RNA	1	MI	Homo sapiens	disease_state: Lung Adenocarcinoma	Sex: Male	age: 66	race: White	vital_status: Alive	clinical_treatment_adjuvant_chemo: No	clinical_treatment_adjuvant_rt: No	disease_stage: pN0pT1	first_progression_or_relapse: --	months_to_first_progression: --	mths_to_last_clinical_assessment: 73.36	months_to_last_contact_or_death: 73.36	smoking_history: Unknown	surgical_margins: ALL MARGINS PATHOLOGICALLY NEGATIVE	organism_part: Lung	histologic_grade: POORLY DIFFERENTIATED	total RNA	See mage-tab files linked to series entry for additional details	biotin	See mage-tab files linked to series entry for additional details	9606	See mage-tab files linked to series entry for additional details	See mage-tab files linked to series entry for additional details	See mage-tab files linked to series entry for additional details	GPL96	Mervi,,Heiskanen	mervi.heiskanen@nih.gov	2402765175	CBIIT	NCI	9609 Medical Center Drive, 1W378	Rockville	MD	20850	USA	ftp://ftp.ncbi.nlm.nih.gov/geo/samples/GSM1672nnn/GSM1672395/suppl/GSM1672395_NCI_lung224_U133A.CEL.gz	ftp://ftp.ncbi.nlm.nih.gov/geo/samples/GSM1672nnn/GSM1672395/suppl/GSM1672395_NCI_lung224_U133A.mas5.CHP.gz	22283
GSM1672396	Public on May 02 2015	May 01 2015	May 02 2015	RNA	1	MI	Homo sapiens	disease_state: Lung Adenocarcinoma	Sex: Female	age: 76	race: White	vital_status: Alive	clinical_treatment_adjuvant_chemo: No	clinical_treatment_adjuvant_rt: No	disease_stage: pN0pT2	first_progression_or_relapse: --	months_to_first_progression: --	mths_to_last_clinical_assessment: 66.74	months_to_last_contact_or_death: 66.74	smoking_history: Unknown	surgical_margins: ALL MARGINS PATHOLOGICALLY NEGATIVE	organism_part: Lung	histologic_grade: Moderate Differentiation	total RNA	See mage-tab files linked to series entry for additional details	biotin	See mage-tab files linked to series entry for additional details	9606	See mage-tab files linked to series entry for additional details	See mage-tab files linked to series entry for additional details	See mage-tab files linked to series entry for additional details	GPL96	Mervi,,Heiskanen	mervi.heiskanen@nih.gov	2402765175	CBIIT	NCI	9609 Medical Center Drive, 1W378	Rockville	MD	20850	USA	ftp://ftp.ncbi.nlm.nih.gov/geo/samples/GSM1672nnn/GSM1672396/suppl/GSM1672396_NCI_lung227_U133A.CEL.gz	ftp://ftp.ncbi.nlm.nih.gov/geo/samples/GSM1672nnn/GSM1672396/suppl/GSM1672396_NCI_lung227_U133A.mas5.CHP.gz	22283
GSM1672397	Public on May 02 2015	May 01 2015	May 02 2015	RNA	1	MI	Homo sapiens	disease_state: Lung Adenocarcinoma	Sex: Female	age: 78	race: White	vital_status: Alive	clinical_treatment_adjuvant_chemo: No	clinical_treatment_adjuvant_rt: No	disease_stage: pN0pT1	first_progression_or_relapse: --	months_to_first_progression: --	mths_to_last_clinical_assessment: 72.8	months_to_last_contact_or_death: 72.8	smoking_history: Unknown	surgical_margins: ALL MARGINS PATHOLOGICALLY NEGATIVE	organism_part: Lung	histologic_grade: Moderate Differentiation	total RNA	See mage-tab files linked to series entry for additional details	biotin	See mage-tab files linked to series entry for additional details	9606	See mage-tab files linked to series entry for additional details	See mage-tab files linked to series entry for additional details	See mage-tab files linked to series entry for additional details	GPL96	Mervi,,Heiskanen	mervi.heiskanen@nih.gov	2402765175	CBIIT	NCI	9609 Medical Center Drive, 1W378	Rockville	MD	20850	USA	ftp://ftp.ncbi.nlm.nih.gov/geo/samples/GSM1672nnn/GSM1672397/suppl/GSM1672397_NCI_lung228_U133A.CEL.gz	ftp://ftp.ncbi.nlm.nih.gov/geo/samples/GSM1672nnn/GSM1672397/suppl/GSM1672397_NCI_lung228_U133A.mas5.CHP.gz	22283
GSM1672398	Public on May 02 2015	May 01 2015	May 02 2015	RNA	1	MI	Homo sapiens	disease_state: Lung Adenocarcinoma	Sex: Male	age: 76	race: White	vital_status: Dead	clinical_treatment_adjuvant_chemo: No	clinical_treatment_adjuvant_rt: No	disease_stage: pN0pT1	first_progression_or_relapse: --	months_to_first_progression: --	mths_to_last_clinical_assessment: 19.9	months_to_last_contact_or_death: 19.9	smoking_history: Unknown	surgical_margins: ALL MARGINS PATHOLOGICALLY NEGATIVE	organism_part: Lung	histologic_grade: Moderate Differentiation	total RNA	See mage-tab files linked to series entry for additional details	biotin	See mage-tab files linked to series entry for additional details	9606	See mage-tab files linked to series entry for additional details	See mage-tab files linked to series entry for additional details	See mage-tab files linked to series entry for additional details	GPL96	Mervi,,Heiskanen	mervi.heiskanen@nih.gov	2402765175	CBIIT	NCI	9609 Medical Center Drive, 1W378	Rockville	MD	20850	USA	ftp://ftp.ncbi.nlm.nih.gov/geo/samples/GSM1672nnn/GSM1672398/suppl/GSM1672398_NCI_lung229_U133A.CEL.gz	ftp://ftp.ncbi.nlm.nih.gov/geo/samples/GSM1672nnn/GSM1672398/suppl/GSM1672398_NCI_lung229_U133A.mas5.CHP.gz	22283
GSM1672399	Public on May 02 2015	May 01 2015	May 02 2015	RNA	1	MI	Homo sapiens	disease_state: Lung Adenocarcinoma	Sex: Female	age: 60	race: White	vital_status: Dead	clinical_treatment_adjuvant_chemo: No	clinical_treatment_adjuvant_rt: No	disease_stage: pN1pT3	first_progression_or_relapse: Yes	months_to_first_progression: 14.3	mths_to_last_clinical_assessment: 31.28	months_to_last_contact_or_death: 31.28	smoking_history: Unknown	surgical_margins: ALL MARGINS PATHOLOGICALLY NEGATIVE	organism_part: Lung	histologic_grade: POORLY DIFFERENTIATED	total RNA	See mage-tab files linked to series entry for additional details	biotin	See mage-tab files linked to series entry for additional details	9606	See mage-tab files linked to series entry for additional details	See mage-tab files linked to series entry for additional details	See mage-tab files linked to series entry for additional details	GPL96	Mervi,,Heiskanen	mervi.heiskanen@nih.gov	2402765175	CBIIT	NCI	9609 Medical Center Drive, 1W378	Rockville	MD	20850	USA	ftp://ftp.ncbi.nlm.nih.gov/geo/samples/GSM1672nnn/GSM1672399/suppl/GSM1672399_NCI_lung230_U133A.CEL.gz	ftp://ftp.ncbi.nlm.nih.gov/geo/samples/GSM1672nnn/GSM1672399/suppl/GSM1672399_NCI_lung230_U133A.mas5.CHP.gz	22283
GSM1672400	Public on May 02 2015	May 01 2015	May 02 2015	RNA	1	MI	Homo sapiens	disease_state: Lung Adenocarcinoma	Sex: Male	age: 73	race: White	vital_status: Dead	clinical_treatment_adjuvant_chemo: No	clinical_treatment_adjuvant_rt: No	disease_stage: pN0pT1	first_progression_or_relapse: --	months_to_first_progression: --	mths_to_last_clinical_assessment: 45.33	months_to_last_contact_or_death: 45.33	smoking_history: Unknown	surgical_margins: ALL MARGINS PATHOLOGICALLY NEGATIVE	organism_part: Lung	histologic_grade: Moderate Differentiation	total RNA	See mage-tab files linked to series entry for additional details	biotin	See mage-tab files linked to series entry for additional details	9606	See mage-tab files linked to series entry for additional details	See mage-tab files linked to series entry for additional details	See mage-tab files linked to series entry for additional details	GPL96	Mervi,,Heiskanen	mervi.heiskanen@nih.gov	2402765175	CBIIT	NCI	9609 Medical Center Drive, 1W378	Rockville	MD	20850	USA	ftp://ftp.ncbi.nlm.nih.gov/geo/samples/GSM1672nnn/GSM1672400/suppl/GSM1672400_NCI_lung231_U133A.CEL.gz	ftp://ftp.ncbi.nlm.nih.gov/geo/samples/GSM1672nnn/GSM1672400/suppl/GSM1672400_NCI_lung231_U133A.mas5.CHP.gz	22283
GSM1672401	Public on May 02 2015	May 01 2015	May 02 2015	RNA	1	MI	Homo sapiens	disease_state: Lung Adenocarcinoma	Sex: Female	age: 72	race: White	vital_status: Alive	clinical_treatment_adjuvant_chemo: No	clinical_treatment_adjuvant_rt: No	disease_stage: pN0pT1	first_progression_or_relapse: --	months_to_first_progression: --	mths_to_last_clinical_assessment: 83.95	months_to_last_contact_or_death: 83.95	smoking_history: Unknown	surgical_margins: ALL MARGINS PATHOLOGICALLY NEGATIVE	organism_part: Lung	histologic_grade: POORLY DIFFERENTIATED	total RNA	See mage-tab files linked to series entry for additional details	biotin	See mage-tab files linked to series entry for additional details	9606	See mage-tab files linked to series entry for additional details	See mage-tab files linked to series entry for additional details	See mage-tab files linked to series entry for additional details	GPL96	Mervi,,Heiskanen	mervi.heiskanen@nih.gov	2402765175	CBIIT	NCI	9609 Medical Center Drive, 1W378	Rockville	MD	20850	USA	ftp://ftp.ncbi.nlm.nih.gov/geo/samples/GSM1672nnn/GSM1672401/suppl/GSM1672401_NCI_lung234_U133A.CEL.gz	ftp://ftp.ncbi.nlm.nih.gov/geo/samples/GSM1672nnn/GSM1672401/suppl/GSM1672401_NCI_lung234_U133A.mas5.CHP.gz	22283
GSM1672402	Public on May 02 2015	May 01 2015	May 02 2015	RNA	1	MI	Homo sapiens	disease_state: Lung Adenocarcinoma	Sex: Female	age: 55	race: White	vital_status: Dead	clinical_treatment_adjuvant_chemo: No	clinical_treatment_adjuvant_rt: No	disease_stage: pN0pT4	first_progression_or_relapse: --	months_to_first_progression: --	mths_to_last_clinical_assessment: 12.63	months_to_last_contact_or_death: 12.63	smoking_history: Unknown	surgical_margins: ALL MARGINS PATHOLOGICALLY NEGATIVE	organism_part: Lung	histologic_grade: POORLY DIFFERENTIATED	total RNA	See mage-tab files linked to series entry for additional details	biotin	See mage-tab files linked to series entry for additional details	9606	See mage-tab files linked to series entry for additional details	See mage-tab files linked to series entry for additional details	See mage-tab files linked to series entry for additional details	GPL96	Mervi,,Heiskanen	mervi.heiskanen@nih.gov	2402765175	CBIIT	NCI	9609 Medical Center Drive, 1W378	Rockville	MD	20850	USA	ftp://ftp.ncbi.nlm.nih.gov/geo/samples/GSM1672nnn/GSM1672402/suppl/GSM1672402_NCI_lung235_U133A.CEL.gz	ftp://ftp.ncbi.nlm.nih.gov/geo/samples/GSM1672nnn/GSM1672402/suppl/GSM1672402_NCI_lung235_U133A.mas5.CHP.gz	22283
GSM1672403	Public on May 02 2015	May 01 2015	May 02 2015	RNA	1	MI	Homo sapiens	disease_state: Lung Adenocarcinoma	Sex: Female	age: 64	race: White	vital_status: Alive	clinical_treatment_adjuvant_chemo: No	clinical_treatment_adjuvant_rt: No	disease_stage: pN0pT2	first_progression_or_relapse: --	months_to_first_progression: --	mths_to_last_clinical_assessment: 77.89	months_to_last_contact_or_death: 77.89	smoking_history: Unknown	surgical_margins: ALL MARGINS PATHOLOGICALLY NEGATIVE	organism_part: Lung	histologic_grade: POORLY DIFFERENTIATED	total RNA	See mage-tab files linked to series entry for additional details	biotin	See mage-tab files linked to series entry for additional details	9606	See mage-tab files linked to series entry for additional details	See mage-tab files linked to series entry for additional details	See mage-tab files linked to series entry for additional details	GPL96	Mervi,,Heiskanen	mervi.heiskanen@nih.gov	2402765175	CBIIT	NCI	9609 Medical Center Drive, 1W378	Rockville	MD	20850	USA	ftp://ftp.ncbi.nlm.nih.gov/geo/samples/GSM1672nnn/GSM1672403/suppl/GSM1672403_NCI_lung236_U133A.CEL.gz	ftp://ftp.ncbi.nlm.nih.gov/geo/samples/GSM1672nnn/GSM1672403/suppl/GSM1672403_NCI_lung236_U133A.mas5.CHP.gz	22283
GSM1672404	Public on May 02 2015	May 01 2015	May 02 2015	RNA	1	MI	Homo sapiens	disease_state: Lung Adenocarcinoma	Sex: Female	age: 53	race: White	vital_status: Alive	clinical_treatment_adjuvant_chemo: No	clinical_treatment_adjuvant_rt: No	disease_stage: pN0pT2	first_progression_or_relapse: Yes	months_to_first_progression: 9.6	mths_to_last_clinical_assessment: 11.18	months_to_last_contact_or_death: 11.18	smoking_history: Unknown	surgical_margins: ALL MARGINS PATHOLOGICALLY NEGATIVE	organism_part: Lung	histologic_grade: POORLY DIFFERENTIATED	total RNA	See mage-tab files linked to series entry for additional details	biotin	See mage-tab files linked to series entry for additional details	9606	See mage-tab files linked to series entry for additional details	See mage-tab files linked to series entry for additional details	See mage-tab files linked to series entry for additional details	GPL96	Mervi,,Heiskanen	mervi.heiskanen@nih.gov	2402765175	CBIIT	NCI	9609 Medical Center Drive, 1W378	Rockville	MD	20850	USA	ftp://ftp.ncbi.nlm.nih.gov/geo/samples/GSM1672nnn/GSM1672404/suppl/GSM1672404_NCI_lung237_U133A.CEL.gz	ftp://ftp.ncbi.nlm.nih.gov/geo/samples/GSM1672nnn/GSM1672404/suppl/GSM1672404_NCI_lung237_U133A.mas5.CHP.gz	22283
GSM1672405	Public on May 02 2015	May 01 2015	May 02 2015	RNA	1	MI	Homo sapiens	disease_state: Lung Adenocarcinoma	Sex: Female	age: 77	race: White	vital_status: Alive	clinical_treatment_adjuvant_chemo: No	clinical_treatment_adjuvant_rt: No	disease_stage: pN0pT4	first_progression_or_relapse: --	months_to_first_progression: --	mths_to_last_clinical_assessment: 30.53	months_to_last_contact_or_death: 30.53	smoking_history: Unknown	surgical_margins: ALL MARGINS PATHOLOGICALLY NEGATIVE	organism_part: Lung	histologic_grade: WELL DIFFERENTIATED	total RNA	See mage-tab files linked to series entry for additional details	biotin	See mage-tab files linked to series entry for additional details	9606	See mage-tab files linked to series entry for additional details	See mage-tab files linked to series entry for additional details	See mage-tab files linked to series entry for additional details	GPL96	Mervi,,Heiskanen	mervi.heiskanen@nih.gov	2402765175	CBIIT	NCI	9609 Medical Center Drive, 1W378	Rockville	MD	20850	USA	ftp://ftp.ncbi.nlm.nih.gov/geo/samples/GSM1672nnn/GSM1672405/suppl/GSM1672405_NCI_lung238_U133A.CEL.gz	ftp://ftp.ncbi.nlm.nih.gov/geo/samples/GSM1672nnn/GSM1672405/suppl/GSM1672405_NCI_lung238_U133A.mas5.CHP.gz	22283
GSM1672406	Public on May 02 2015	May 01 2015	May 02 2015	RNA	1	MI	Homo sapiens	disease_state: Lung Adenocarcinoma	Sex: Female	age: 55	race: White	vital_status: Alive	clinical_treatment_adjuvant_chemo: No	clinical_treatment_adjuvant_rt: No	disease_stage: pN0pT1	first_progression_or_relapse: Yes	months_to_first_progression: 32	mths_to_last_clinical_assessment: 73.59	months_to_last_contact_or_death: 73.59	smoking_history: Unknown	surgical_margins: ALL MARGINS PATHOLOGICALLY NEGATIVE	organism_part: Lung	histologic_grade: Moderate Differentiation	total RNA	See mage-tab files linked to series entry for additional details	biotin	See mage-tab files linked to series entry for additional details	9606	See mage-tab files linked to series entry for additional details	See mage-tab files linked to series entry for additional details	See mage-tab files linked to series entry for additional details	GPL96	Mervi,,Heiskanen	mervi.heiskanen@nih.gov	2402765175	CBIIT	NCI	9609 Medical Center Drive, 1W378	Rockville	MD	20850	USA	ftp://ftp.ncbi.nlm.nih.gov/geo/samples/GSM1672nnn/GSM1672406/suppl/GSM1672406_NCI_lung239_U133A.CEL.gz	ftp://ftp.ncbi.nlm.nih.gov/geo/samples/GSM1672nnn/GSM1672406/suppl/GSM1672406_NCI_lung239_U133A.mas5.CHP.gz	22283
GSM1672407	Public on May 02 2015	May 01 2015	May 02 2015	RNA	1	MI	Homo sapiens	disease_state: Lung Adenocarcinoma	Sex: Male	age: 67	race: White	vital_status: Dead	clinical_treatment_adjuvant_chemo: No	clinical_treatment_adjuvant_rt: No	disease_stage: pN0pT2	first_progression_or_relapse: Yes	months_to_first_progression: 6.2	mths_to_last_clinical_assessment: 11.68	months_to_last_contact_or_death: 11.68	smoking_history: Unknown	surgical_margins: ALL MARGINS PATHOLOGICALLY NEGATIVE	organism_part: Lung	histologic_grade: Moderate Differentiation	total RNA	See mage-tab files linked to series entry for additional details	biotin	See mage-tab files linked to series entry for additional details	9606	See mage-tab files linked to series entry for additional details	See mage-tab files linked to series entry for additional details	See mage-tab files linked to series entry for additional details	GPL96	Mervi,,Heiskanen	mervi.heiskanen@nih.gov	2402765175	CBIIT	NCI	9609 Medical Center Drive, 1W378	Rockville	MD	20850	USA	ftp://ftp.ncbi.nlm.nih.gov/geo/samples/GSM1672nnn/GSM1672407/suppl/GSM1672407_NCI_lung240_U133A.CEL.gz	ftp://ftp.ncbi.nlm.nih.gov/geo/samples/GSM1672nnn/GSM1672407/suppl/GSM1672407_NCI_lung240_U133A.mas5.CHP.gz	22283
GSM1672408	Public on May 02 2015	May 01 2015	May 02 2015	RNA	1	MI	Homo sapiens	disease_state: Lung Adenocarcinoma	Sex: Female	age: 70	race: White	vital_status: Alive	clinical_treatment_adjuvant_chemo: No	clinical_treatment_adjuvant_rt: No	disease_stage: pN0pT1	first_progression_or_relapse: --	months_to_first_progression: --	mths_to_last_clinical_assessment: 74.61	months_to_last_contact_or_death: 74.61	smoking_history: Unknown	surgical_margins: ALL MARGINS PATHOLOGICALLY NEGATIVE	organism_part: Lung	histologic_grade: POORLY DIFFERENTIATED	total RNA	See mage-tab files linked to series entry for additional details	biotin	See mage-tab files linked to series entry for additional details	9606	See mage-tab files linked to series entry for additional details	See mage-tab files linked to series entry for additional details	See mage-tab files linked to series entry for additional details	GPL96	Mervi,,Heiskanen	mervi.heiskanen@nih.gov	2402765175	CBIIT	NCI	9609 Medical Center Drive, 1W378	Rockville	MD	20850	USA	ftp://ftp.ncbi.nlm.nih.gov/geo/samples/GSM1672nnn/GSM1672408/suppl/GSM1672408_NCI_lung246_U133A.CEL.gz	ftp://ftp.ncbi.nlm.nih.gov/geo/samples/GSM1672nnn/GSM1672408/suppl/GSM1672408_NCI_lung246_U133A.mas5.CHP.gz	22283
GSM1672409	Public on May 02 2015	May 01 2015	May 02 2015	RNA	1	MI	Homo sapiens	disease_state: Lung Adenocarcinoma	Sex: Female	age: 72	race: White	vital_status: Dead	clinical_treatment_adjuvant_chemo: No	clinical_treatment_adjuvant_rt: No	disease_stage: pN0pT2	first_progression_or_relapse: Yes	months_to_first_progression: 15	mths_to_last_clinical_assessment: 31.94	months_to_last_contact_or_death: 31.94	smoking_history: Unknown	surgical_margins: ALL MARGINS PATHOLOGICALLY NEGATIVE	organism_part: Lung	histologic_grade: WELL DIFFERENTIATED	total RNA	See mage-tab files linked to series entry for additional details	biotin	See mage-tab files linked to series entry for additional details	9606	See mage-tab files linked to series entry for additional details	See mage-tab files linked to series entry for additional details	See mage-tab files linked to series entry for additional details	GPL96	Mervi,,Heiskanen	mervi.heiskanen@nih.gov	2402765175	CBIIT	NCI	9609 Medical Center Drive, 1W378	Rockville	MD	20850	USA	ftp://ftp.ncbi.nlm.nih.gov/geo/samples/GSM1672nnn/GSM1672409/suppl/GSM1672409_NCI_lung247_U133A.CEL.gz	ftp://ftp.ncbi.nlm.nih.gov/geo/samples/GSM1672nnn/GSM1672409/suppl/GSM1672409_NCI_lung247_U133A.mas5.CHP.gz	22283
GSM1672410	Public on May 02 2015	May 01 2015	May 02 2015	RNA	1	MI	Homo sapiens	disease_state: Lung Adenocarcinoma	Sex: Male	age: 43	race: White	vital_status: Dead	clinical_treatment_adjuvant_chemo: No	clinical_treatment_adjuvant_rt: No	disease_stage: pN0pT1	first_progression_or_relapse: --	months_to_first_progression: --	mths_to_last_clinical_assessment: 2.24	months_to_last_contact_or_death: 2.24	smoking_history: Unknown	surgical_margins: ALL MARGINS PATHOLOGICALLY NEGATIVE	organism_part: Lung	histologic_grade: Moderate Differentiation	total RNA	See mage-tab files linked to series entry for additional details	biotin	See mage-tab files linked to series entry for additional details	9606	See mage-tab files linked to series entry for additional details	See mage-tab files linked to series entry for additional details	See mage-tab files linked to series entry for additional details	GPL96	Mervi,,Heiskanen	mervi.heiskanen@nih.gov	2402765175	CBIIT	NCI	9609 Medical Center Drive, 1W378	Rockville	MD	20850	USA	ftp://ftp.ncbi.nlm.nih.gov/geo/samples/GSM1672nnn/GSM1672410/suppl/GSM1672410_NCI_lung249_U133A.CEL.gz	ftp://ftp.ncbi.nlm.nih.gov/geo/samples/GSM1672nnn/GSM1672410/suppl/GSM1672410_NCI_lung249_U133A.mas5.CHP.gz	22283
GSM1672411	Public on May 02 2015	May 01 2015	May 02 2015	RNA	1	MI	Homo sapiens	disease_state: Lung Adenocarcinoma	Sex: Female	age: 52	race: White	vital_status: Dead	clinical_treatment_adjuvant_chemo: No	clinical_treatment_adjuvant_rt: No	disease_stage: pN1pT1	first_progression_or_relapse: --	months_to_first_progression: --	mths_to_last_clinical_assessment: 8.85	months_to_last_contact_or_death: 8.85	smoking_history: Unknown	surgical_margins: ALL MARGINS PATHOLOGICALLY NEGATIVE	organism_part: Lung	histologic_grade: POORLY DIFFERENTIATED	total RNA	See mage-tab files linked to series entry for additional details	biotin	See mage-tab files linked to series entry for additional details	9606	See mage-tab files linked to series entry for additional details	See mage-tab files linked to series entry for additional details	See mage-tab files linked to series entry for additional details	GPL96	Mervi,,Heiskanen	mervi.heiskanen@nih.gov	2402765175	CBIIT	NCI	9609 Medical Center Drive, 1W378	Rockville	MD	20850	USA	ftp://ftp.ncbi.nlm.nih.gov/geo/samples/GSM1672nnn/GSM1672411/suppl/GSM1672411_NCI_lung258_U133A.CEL.gz	ftp://ftp.ncbi.nlm.nih.gov/geo/samples/GSM1672nnn/GSM1672411/suppl/GSM1672411_NCI_lung258_U133A.mas5.CHP.gz	22283
GSM1672412	Public on May 02 2015	May 01 2015	May 02 2015	RNA	1	MI	Homo sapiens	disease_state: Lung Adenocarcinoma	Sex: Female	age: 69	race: White	vital_status: Alive	clinical_treatment_adjuvant_chemo: No	clinical_treatment_adjuvant_rt: No	disease_stage: pN0pT1	first_progression_or_relapse: --	months_to_first_progression: --	mths_to_last_clinical_assessment: 92.2	months_to_last_contact_or_death: 92.2	smoking_history: Unknown	surgical_margins: ALL MARGINS PATHOLOGICALLY NEGATIVE	organism_part: Lung	histologic_grade: POORLY DIFFERENTIATED	total RNA	See mage-tab files linked to series entry for additional details	biotin	See mage-tab files linked to series entry for additional details	9606	See mage-tab files linked to series entry for additional details	See mage-tab files linked to series entry for additional details	See mage-tab files linked to series entry for additional details	GPL96	Mervi,,Heiskanen	mervi.heiskanen@nih.gov	2402765175	CBIIT	NCI	9609 Medical Center Drive, 1W378	Rockville	MD	20850	USA	ftp://ftp.ncbi.nlm.nih.gov/geo/samples/GSM1672nnn/GSM1672412/suppl/GSM1672412_NCI_lung259_U133A.CEL.gz	ftp://ftp.ncbi.nlm.nih.gov/geo/samples/GSM1672nnn/GSM1672412/suppl/GSM1672412_NCI_lung259_U133A.mas5.CHP.gz	22283
GSM1672413	Public on May 02 2015	May 01 2015	May 02 2015	RNA	1	MI	Homo sapiens	disease_state: Lung Adenocarcinoma	Sex: Female	age: 33	race: Not Reported	vital_status: Alive	clinical_treatment_adjuvant_chemo: No	clinical_treatment_adjuvant_rt: No	disease_stage: pN0pT2	first_progression_or_relapse: Yes	months_to_first_progression: 7	mths_to_last_clinical_assessment: 90.07	months_to_last_contact_or_death: 90.07	smoking_history: Unknown	surgical_margins: ALL MARGINS PATHOLOGICALLY NEGATIVE	organism_part: Lung	histologic_grade: WELL DIFFERENTIATED	total RNA	See mage-tab files linked to series entry for additional details	biotin	See mage-tab files linked to series entry for additional details	9606	See mage-tab files linked to series entry for additional details	See mage-tab files linked to series entry for additional details	See mage-tab files linked to series entry for additional details	GPL96	Mervi,,Heiskanen	mervi.heiskanen@nih.gov	2402765175	CBIIT	NCI	9609 Medical Center Drive, 1W378	Rockville	MD	20850	USA	ftp://ftp.ncbi.nlm.nih.gov/geo/samples/GSM1672nnn/GSM1672413/suppl/GSM1672413_NCI_lung263_U133A.CEL.gz	ftp://ftp.ncbi.nlm.nih.gov/geo/samples/GSM1672nnn/GSM1672413/suppl/GSM1672413_NCI_lung263_U133A.mas5.CHP.gz	22283
GSM1672414	Public on May 02 2015	May 01 2015	May 02 2015	RNA	1	MI	Homo sapiens	disease_state: Lung Adenocarcinoma	Sex: Male	age: 59	race: White	vital_status: Dead	clinical_treatment_adjuvant_chemo: No	clinical_treatment_adjuvant_rt: No	disease_stage: pN1pT3	first_progression_or_relapse: --	months_to_first_progression: --	mths_to_last_clinical_assessment: 24.97	months_to_last_contact_or_death: 24.97	smoking_history: Unknown	surgical_margins: ALL MARGINS PATHOLOGICALLY NEGATIVE	organism_part: Lung	histologic_grade: POORLY DIFFERENTIATED	total RNA	See mage-tab files linked to series entry for additional details	biotin	See mage-tab files linked to series entry for additional details	9606	See mage-tab files linked to series entry for additional details	See mage-tab files linked to series entry for additional details	See mage-tab files linked to series entry for additional details	GPL96	Mervi,,Heiskanen	mervi.heiskanen@nih.gov	2402765175	CBIIT	NCI	9609 Medical Center Drive, 1W378	Rockville	MD	20850	USA	ftp://ftp.ncbi.nlm.nih.gov/geo/samples/GSM1672nnn/GSM1672414/suppl/GSM1672414_NCI_lung267_U133A.CEL.gz	ftp://ftp.ncbi.nlm.nih.gov/geo/samples/GSM1672nnn/GSM1672414/suppl/GSM1672414_NCI_lung267_U133A.mas5.CHP.gz	22283
GSM1672415	Public on May 02 2015	May 01 2015	May 02 2015	RNA	1	MI	Homo sapiens	disease_state: Lung Adenocarcinoma	Sex: Male	age: 62	race: White	vital_status: Dead	clinical_treatment_adjuvant_chemo: No	clinical_treatment_adjuvant_rt: No	disease_stage: pN0pT1	first_progression_or_relapse: Yes	months_to_first_progression: 41	mths_to_last_clinical_assessment: 42.04	months_to_last_contact_or_death: 42.04	smoking_history: Unknown	surgical_margins: ALL MARGINS PATHOLOGICALLY NEGATIVE	organism_part: Lung	histologic_grade: Moderate Differentiation	total RNA	See mage-tab files linked to series entry for additional details	biotin	See mage-tab files linked to series entry for additional details	9606	See mage-tab files linked to series entry for additional details	See mage-tab files linked to series entry for additional details	See mage-tab files linked to series entry for additional details	GPL96	Mervi,,Heiskanen	mervi.heiskanen@nih.gov	2402765175	CBIIT	NCI	9609 Medical Center Drive, 1W378	Rockville	MD	20850	USA	ftp://ftp.ncbi.nlm.nih.gov/geo/samples/GSM1672nnn/GSM1672415/suppl/GSM1672415_NCI_lung268_U133A.CEL.gz	ftp://ftp.ncbi.nlm.nih.gov/geo/samples/GSM1672nnn/GSM1672415/suppl/GSM1672415_NCI_lung268_U133A.mas5.CHP.gz	22283
GSM1672416	Public on May 02 2015	May 01 2015	May 02 2015	RNA	1	MI	Homo sapiens	disease_state: Lung Adenocarcinoma	Sex: Male	age: 70	race: Unknown	vital_status: Dead	clinical_treatment_adjuvant_chemo: No	clinical_treatment_adjuvant_rt: No	disease_stage: pN0pT1	first_progression_or_relapse: --	months_to_first_progression: --	mths_to_last_clinical_assessment: 12.17	months_to_last_contact_or_death: 12.2	smoking_history: Unknown	surgical_margins: ALL MARGINS PATHOLOGICALLY NEGATIVE	organism_part: Lung	histologic_grade: POORLY DIFFERENTIATED	total RNA	See mage-tab files linked to series entry for additional details	biotin	See mage-tab files linked to series entry for additional details	9606	See mage-tab files linked to series entry for additional details	See mage-tab files linked to series entry for additional details	See mage-tab files linked to series entry for additional details	GPL96	Mervi,,Heiskanen	mervi.heiskanen@nih.gov	2402765175	CBIIT	NCI	9609 Medical Center Drive, 1W378	Rockville	MD	20850	USA	ftp://ftp.ncbi.nlm.nih.gov/geo/samples/GSM1672nnn/GSM1672416/suppl/GSM1672416_NCI_lung269_U133A.CEL.gz	ftp://ftp.ncbi.nlm.nih.gov/geo/samples/GSM1672nnn/GSM1672416/suppl/GSM1672416_NCI_lung269_U133A.mas5.CHP.gz	22283
GSM1672417	Public on May 02 2015	May 01 2015	May 02 2015	RNA	1	MI	Homo sapiens	disease_state: Lung Adenocarcinoma	Sex: Male	age: 74	race: Unknown	vital_status: Dead	clinical_treatment_adjuvant_chemo: Unknown	clinical_treatment_adjuvant_rt: Unknown	disease_stage: pN1pT3	first_progression_or_relapse: Yes	months_to_first_progression: --	mths_to_last_clinical_assessment: 2.7	months_to_last_contact_or_death: 2.7	smoking_history: Unknown	surgical_margins: ALL MARGINS PATHOLOGICALLY NEGATIVE	organism_part: Lung	histologic_grade: POORLY DIFFERENTIATED	total RNA	See mage-tab files linked to series entry for additional details	biotin	See mage-tab files linked to series entry for additional details	9606	See mage-tab files linked to series entry for additional details	See mage-tab files linked to series entry for additional details	See mage-tab files linked to series entry for additional details	GPL96	Mervi,,Heiskanen	mervi.heiskanen@nih.gov	2402765175	CBIIT	NCI	9609 Medical Center Drive, 1W378	Rockville	MD	20850	USA	ftp://ftp.ncbi.nlm.nih.gov/geo/samples/GSM1672nnn/GSM1672417/suppl/GSM1672417_NCI_lung270_U133A.CEL.gz	ftp://ftp.ncbi.nlm.nih.gov/geo/samples/GSM1672nnn/GSM1672417/suppl/GSM1672417_NCI_lung270_U133A.mas5.CHP.gz	22283
GSM1672418	Public on May 02 2015	May 01 2015	May 02 2015	RNA	1	MI	Homo sapiens	disease_state: Lung Adenocarcinoma	Sex: Male	age: 46	race: Unknown	vital_status: Dead	clinical_treatment_adjuvant_chemo: Unknown	clinical_treatment_adjuvant_rt: Unknown	disease_stage: pN0pT2	first_progression_or_relapse: Yes	months_to_first_progression: --	mths_to_last_clinical_assessment: 95.97	months_to_last_contact_or_death: 96	smoking_history: Unknown	surgical_margins: ALL MARGINS PATHOLOGICALLY NEGATIVE	organism_part: Lung	histologic_grade: Moderate Differentiation	total RNA	See mage-tab files linked to series entry for additional details	biotin	See mage-tab files linked to series entry for additional details	9606	See mage-tab files linked to series entry for additional details	See mage-tab files linked to series entry for additional details	See mage-tab files linked to series entry for additional details	GPL96	Mervi,,Heiskanen	mervi.heiskanen@nih.gov	2402765175	CBIIT	NCI	9609 Medical Center Drive, 1W378	Rockville	MD	20850	USA	ftp://ftp.ncbi.nlm.nih.gov/geo/samples/GSM1672nnn/GSM1672418/suppl/GSM1672418_NCI_lung271_U133A.CEL.gz	ftp://ftp.ncbi.nlm.nih.gov/geo/samples/GSM1672nnn/GSM1672418/suppl/GSM1672418_NCI_lung271_U133A.mas5.CHP.gz	22283
GSM1672419	Public on May 02 2015	May 01 2015	May 02 2015	RNA	1	MI	Homo sapiens	disease_state: Lung Adenocarcinoma	Sex: Male	age: 67	race: Unknown	vital_status: Dead	clinical_treatment_adjuvant_chemo: Unknown	clinical_treatment_adjuvant_rt: Unknown	disease_stage: pN0pT4	first_progression_or_relapse: --	months_to_first_progression: --	mths_to_last_clinical_assessment: 66.07	months_to_last_contact_or_death: 66.1	smoking_history: Unknown	surgical_margins: ALL MARGINS PATHOLOGICALLY NEGATIVE	organism_part: Lung	histologic_grade: Moderate Differentiation	total RNA	See mage-tab files linked to series entry for additional details	biotin	See mage-tab files linked to series entry for additional details	9606	See mage-tab files linked to series entry for additional details	See mage-tab files linked to series entry for additional details	See mage-tab files linked to series entry for additional details	GPL96	Mervi,,Heiskanen	mervi.heiskanen@nih.gov	2402765175	CBIIT	NCI	9609 Medical Center Drive, 1W378	Rockville	MD	20850	USA	ftp://ftp.ncbi.nlm.nih.gov/geo/samples/GSM1672nnn/GSM1672419/suppl/GSM1672419_NCI_lung272_U133A.CEL.gz	ftp://ftp.ncbi.nlm.nih.gov/geo/samples/GSM1672nnn/GSM1672419/suppl/GSM1672419_NCI_lung272_U133A.mas5.CHP.gz	22283
GSM1672420	Public on May 02 2015	May 01 2015	May 02 2015	RNA	1	MI	Homo sapiens	disease_state: Lung Adenocarcinoma	Sex: Male	age: 60	race: Unknown	vital_status: Dead	clinical_treatment_adjuvant_chemo: Unknown	clinical_treatment_adjuvant_rt: Unknown	disease_stage: pN0pT2	first_progression_or_relapse: Yes	months_to_first_progression: --	mths_to_last_clinical_assessment: 68.6	months_to_last_contact_or_death: 68.6	smoking_history: Unknown	surgical_margins: ALL MARGINS PATHOLOGICALLY NEGATIVE	organism_part: Lung	histologic_grade: POORLY DIFFERENTIATED	total RNA	See mage-tab files linked to series entry for additional details	biotin	See mage-tab files linked to series entry for additional details	9606	See mage-tab files linked to series entry for additional details	See mage-tab files linked to series entry for additional details	See mage-tab files linked to series entry for additional details	GPL96	Mervi,,Heiskanen	mervi.heiskanen@nih.gov	2402765175	CBIIT	NCI	9609 Medical Center Drive, 1W378	Rockville	MD	20850	USA	ftp://ftp.ncbi.nlm.nih.gov/geo/samples/GSM1672nnn/GSM1672420/suppl/GSM1672420_NCI_lung273_U133A.CEL.gz	ftp://ftp.ncbi.nlm.nih.gov/geo/samples/GSM1672nnn/GSM1672420/suppl/GSM1672420_NCI_lung273_U133A.mas5.CHP.gz	22283
GSM1672421	Public on May 02 2015	May 01 2015	May 02 2015	RNA	1	MI	Homo sapiens	disease_state: Lung Adenocarcinoma	Sex: Male	age: 75	race: Unknown	vital_status: Dead	clinical_treatment_adjuvant_chemo: Unknown	clinical_treatment_adjuvant_rt: Unknown	disease_stage: pN0pT2	first_progression_or_relapse: Yes	months_to_first_progression: --	mths_to_last_clinical_assessment: 48	months_to_last_contact_or_death: 48	smoking_history: Unknown	surgical_margins: ALL MARGINS PATHOLOGICALLY NEGATIVE	organism_part: Lung	histologic_grade: Moderate Differentiation	total RNA	See mage-tab files linked to series entry for additional details	biotin	See mage-tab files linked to series entry for additional details	9606	See mage-tab files linked to series entry for additional details	See mage-tab files linked to series entry for additional details	See mage-tab files linked to series entry for additional details	GPL96	Mervi,,Heiskanen	mervi.heiskanen@nih.gov	2402765175	CBIIT	NCI	9609 Medical Center Drive, 1W378	Rockville	MD	20850	USA	ftp://ftp.ncbi.nlm.nih.gov/geo/samples/GSM1672nnn/GSM1672421/suppl/GSM1672421_NCI_lung274_U133A.CEL.gz	ftp://ftp.ncbi.nlm.nih.gov/geo/samples/GSM1672nnn/GSM1672421/suppl/GSM1672421_NCI_lung274_U133A.mas5.CHP.gz	22283
GSM1672422	Public on May 02 2015	May 01 2015	May 02 2015	RNA	1	MSKCC	Homo sapiens	disease_state: Lung Adenocarcinoma	Sex: Male	age: 64	race: White	vital_status: Dead	clinical_treatment_adjuvant_chemo: Yes	clinical_treatment_adjuvant_rt: No	disease_stage: pN1pT3	first_progression_or_relapse: Yes	months_to_first_progression: 8	mths_to_last_clinical_assessment: 15	months_to_last_contact_or_death: 16	smoking_history: Currently smoking	surgical_margins: ALL MARGINS PATHOLOGICALLY NEGATIVE	organism_part: Lung	histologic_grade: POORLY DIFFERENTIATED	total RNA	See mage-tab files linked to series entry for additional details	biotin	See mage-tab files linked to series entry for additional details	9606	See mage-tab files linked to series entry for additional details	See mage-tab files linked to series entry for additional details	See mage-tab files linked to series entry for additional details	GPL96	Mervi,,Heiskanen	mervi.heiskanen@nih.gov	2402765175	CBIIT	NCI	9609 Medical Center Drive, 1W378	Rockville	MD	20850	USA	ftp://ftp.ncbi.nlm.nih.gov/geo/samples/GSM1672nnn/GSM1672422/suppl/GSM1672422_NCI_U133A_1L.CEL.gz	ftp://ftp.ncbi.nlm.nih.gov/geo/samples/GSM1672nnn/GSM1672422/suppl/GSM1672422_NCI_U133A_1L.mas5.CHP.gz	22283
GSM1672423	Public on May 02 2015	May 01 2015	May 02 2015	RNA	1	MSKCC	Homo sapiens	disease_state: Lung Adenocarcinoma	Sex: Male	age: 62	race: White	vital_status: Alive	clinical_treatment_adjuvant_chemo: Yes	clinical_treatment_adjuvant_rt: Yes	disease_stage: pN0pT2	first_progression_or_relapse: Yes	months_to_first_progression: 3	mths_to_last_clinical_assessment: 72	months_to_last_contact_or_death: 72	smoking_history: Smoked in the past	surgical_margins: ALL MARGINS PATHOLOGICALLY NEGATIVE	organism_part: Lung	histologic_grade: Moderate Differentiation	total RNA	See mage-tab files linked to series entry for additional details	biotin	See mage-tab files linked to series entry for additional details	9606	See mage-tab files linked to series entry for additional details	See mage-tab files linked to series entry for additional details	See mage-tab files linked to series entry for additional details	GPL96	Mervi,,Heiskanen	mervi.heiskanen@nih.gov	2402765175	CBIIT	NCI	9609 Medical Center Drive, 1W378	Rockville	MD	20850	USA	ftp://ftp.ncbi.nlm.nih.gov/geo/samples/GSM1672nnn/GSM1672423/suppl/GSM1672423_NCI_U133A_2L.CEL.gz	ftp://ftp.ncbi.nlm.nih.gov/geo/samples/GSM1672nnn/GSM1672423/suppl/GSM1672423_NCI_U133A_2L.mas5.CHP.gz	22283
GSM1672424	Public on May 02 2015	May 01 2015	May 02 2015	RNA	1	MSKCC	Homo sapiens	disease_state: Lung Adenocarcinoma	Sex: Female	age: 70	race: White	vital_status: Alive	clinical_treatment_adjuvant_chemo: No	clinical_treatment_adjuvant_rt: No	disease_stage: pN0pT1	first_progression_or_relapse: No	months_to_first_progression: --	mths_to_last_clinical_assessment: 47	months_to_last_contact_or_death: 47	smoking_history: Smoked in the past	surgical_margins: ALL MARGINS PATHOLOGICALLY NEGATIVE	organism_part: Lung	histologic_grade: Moderate Differentiation	total RNA	See mage-tab files linked to series entry for additional details	biotin	See mage-tab files linked to series entry for additional details	9606	See mage-tab files linked to series entry for additional details	See mage-tab files linked to series entry for additional details	See mage-tab files linked to series entry for additional details	GPL96	Mervi,,Heiskanen	mervi.heiskanen@nih.gov	2402765175	CBIIT	NCI	9609 Medical Center Drive, 1W378	Rockville	MD	20850	USA	ftp://ftp.ncbi.nlm.nih.gov/geo/samples/GSM1672nnn/GSM1672424/suppl/GSM1672424_NCI_U133A_3L.CEL.gz	ftp://ftp.ncbi.nlm.nih.gov/geo/samples/GSM1672nnn/GSM1672424/suppl/GSM1672424_NCI_U133A_3L.mas5.CHP.gz	22283
GSM1672425	Public on May 02 2015	May 01 2015	May 02 2015	RNA	1	MSKCC	Homo sapiens	disease_state: Lung Adenocarcinoma	Sex: Male	age: 67	race: White	vital_status: Dead	clinical_treatment_adjuvant_chemo: No	clinical_treatment_adjuvant_rt: Yes	disease_stage: pN2pT3	first_progression_or_relapse: Yes	months_to_first_progression: 50	mths_to_last_clinical_assessment: 52	months_to_last_contact_or_death: 52	smoking_history: Smoked in the past	surgical_margins: ALL MARGINS PATHOLOGICALLY NEGATIVE	organism_part: Lung	histologic_grade: POORLY DIFFERENTIATED	total RNA	See mage-tab files linked to series entry for additional details	biotin	See mage-tab files linked to series entry for additional details	9606	See mage-tab files linked to series entry for additional details	See mage-tab files linked to series entry for additional details	See mage-tab files linked to series entry for additional details	GPL96	Mervi,,Heiskanen	mervi.heiskanen@nih.gov	2402765175	CBIIT	NCI	9609 Medical Center Drive, 1W378	Rockville	MD	20850	USA	ftp://ftp.ncbi.nlm.nih.gov/geo/samples/GSM1672nnn/GSM1672425/suppl/GSM1672425_NCI_U133A_4L.CEL.gz	ftp://ftp.ncbi.nlm.nih.gov/geo/samples/GSM1672nnn/GSM1672425/suppl/GSM1672425_NCI_U133A_4L.mas5.CHP.gz	22283
GSM1672426	Public on May 02 2015	May 01 2015	May 02 2015	RNA	1	MSKCC	Homo sapiens	disease_state: Lung Adenocarcinoma	Sex: Female	age: 56	race: White	vital_status: Dead	clinical_treatment_adjuvant_chemo: Yes	clinical_treatment_adjuvant_rt: No	disease_stage: pN1pT2	first_progression_or_relapse: Yes	months_to_first_progression: 14	mths_to_last_clinical_assessment: 28	months_to_last_contact_or_death: 39	smoking_history: Currently smoking	surgical_margins: ALL MARGINS PATHOLOGICALLY NEGATIVE	organism_part: Lung	histologic_grade: POORLY DIFFERENTIATED	total RNA	See mage-tab files linked to series entry for additional details	biotin	See mage-tab files linked to series entry for additional details	9606	See mage-tab files linked to series entry for additional details	See mage-tab files linked to series entry for additional details	See mage-tab files linked to series entry for additional details	GPL96	Mervi,,Heiskanen	mervi.heiskanen@nih.gov	2402765175	CBIIT	NCI	9609 Medical Center Drive, 1W378	Rockville	MD	20850	USA	ftp://ftp.ncbi.nlm.nih.gov/geo/samples/GSM1672nnn/GSM1672426/suppl/GSM1672426_NCI_U133A_5L.CEL.gz	ftp://ftp.ncbi.nlm.nih.gov/geo/samples/GSM1672nnn/GSM1672426/suppl/GSM1672426_NCI_U133A_5L.mas5.CHP.gz	22283
GSM1672427	Public on May 02 2015	May 01 2015	May 02 2015	RNA	1	MSKCC	Homo sapiens	disease_state: Lung Adenocarcinoma	Sex: Male	age: 57	race: White	vital_status: Alive	clinical_treatment_adjuvant_chemo: No	clinical_treatment_adjuvant_rt: No	disease_stage: pN1pT1	first_progression_or_relapse: No	months_to_first_progression: --	mths_to_last_clinical_assessment: 66	months_to_last_contact_or_death: 66	smoking_history: Smoked in the past	surgical_margins: ALL MARGINS PATHOLOGICALLY NEGATIVE	organism_part: Lung	histologic_grade: Moderate Differentiation	total RNA	See mage-tab files linked to series entry for additional details	biotin	See mage-tab files linked to series entry for additional details	9606	See mage-tab files linked to series entry for additional details	See mage-tab files linked to series entry for additional details	See mage-tab files linked to series entry for additional details	GPL96	Mervi,,Heiskanen	mervi.heiskanen@nih.gov	2402765175	CBIIT	NCI	9609 Medical Center Drive, 1W378	Rockville	MD	20850	USA	ftp://ftp.ncbi.nlm.nih.gov/geo/samples/GSM1672nnn/GSM1672427/suppl/GSM1672427_NCI_U133A_6L.CEL.gz	ftp://ftp.ncbi.nlm.nih.gov/geo/samples/GSM1672nnn/GSM1672427/suppl/GSM1672427_NCI_U133A_6L.mas5.CHP.gz	22283
GSM1672428	Public on May 02 2015	May 01 2015	May 02 2015	RNA	1	MSKCC	Homo sapiens	disease_state: Lung Adenocarcinoma	Sex: Female	age: 81	race: White	vital_status: Alive	clinical_treatment_adjuvant_chemo: No	clinical_treatment_adjuvant_rt: No	disease_stage: pN0pT2	first_progression_or_relapse: No	months_to_first_progression: --	mths_to_last_clinical_assessment: 44	months_to_last_contact_or_death: 44	smoking_history: Never smoked	surgical_margins: ALL MARGINS PATHOLOGICALLY NEGATIVE	organism_part: Lung	histologic_grade: Moderate Differentiation	total RNA	See mage-tab files linked to series entry for additional details	biotin	See mage-tab files linked to series entry for additional details	9606	See mage-tab files linked to series entry for additional details	See mage-tab files linked to series entry for additional details	See mage-tab files linked to series entry for additional details	GPL96	Mervi,,Heiskanen	mervi.heiskanen@nih.gov	2402765175	CBIIT	NCI	9609 Medical Center Drive, 1W378	Rockville	MD	20850	USA	ftp://ftp.ncbi.nlm.nih.gov/geo/samples/GSM1672nnn/GSM1672428/suppl/GSM1672428_NCI_U133A_7L.CEL.gz	ftp://ftp.ncbi.nlm.nih.gov/geo/samples/GSM1672nnn/GSM1672428/suppl/GSM1672428_NCI_U133A_7L.mas5.CHP.gz	22283
GSM1672429	Public on May 02 2015	May 01 2015	May 02 2015	RNA	1	MSKCC	Homo sapiens	disease_state: Lung Adenocarcinoma	Sex: Female	age: 65	race: White	vital_status: Alive	clinical_treatment_adjuvant_chemo: No	clinical_treatment_adjuvant_rt: No	disease_stage: pN0pT1	first_progression_or_relapse: No	months_to_first_progression: --	mths_to_last_clinical_assessment: 70	months_to_last_contact_or_death: 70	smoking_history: Smoked in the past	surgical_margins: ALL MARGINS PATHOLOGICALLY NEGATIVE	organism_part: Lung	histologic_grade: WELL DIFFERENTIATED	total RNA	See mage-tab files linked to series entry for additional details	biotin	See mage-tab files linked to series entry for additional details	9606	See mage-tab files linked to series entry for additional details	See mage-tab files linked to series entry for additional details	See mage-tab files linked to series entry for additional details	GPL96	Mervi,,Heiskanen	mervi.heiskanen@nih.gov	2402765175	CBIIT	NCI	9609 Medical Center Drive, 1W378	Rockville	MD	20850	USA	ftp://ftp.ncbi.nlm.nih.gov/geo/samples/GSM1672nnn/GSM1672429/suppl/GSM1672429_NCI_U133A_8L.CEL.gz	ftp://ftp.ncbi.nlm.nih.gov/geo/samples/GSM1672nnn/GSM1672429/suppl/GSM1672429_NCI_U133A_8L.mas5.CHP.gz	22283
GSM1672430	Public on May 02 2015	May 01 2015	May 02 2015	RNA	1	MSKCC	Homo sapiens	disease_state: Lung Adenocarcinoma	Sex: Female	age: 73	race: White	vital_status: Alive	clinical_treatment_adjuvant_chemo: No	clinical_treatment_adjuvant_rt: No	disease_stage: pN2pT2	first_progression_or_relapse: No	months_to_first_progression: --	mths_to_last_clinical_assessment: 74	months_to_last_contact_or_death: 75	smoking_history: Never smoked	surgical_margins: ALL MARGINS PATHOLOGICALLY NEGATIVE	organism_part: Lung	histologic_grade: Moderate Differentiation	total RNA	See mage-tab files linked to series entry for additional details	biotin	See mage-tab files linked to series entry for additional details	9606	See mage-tab files linked to series entry for additional details	See mage-tab files linked to series entry for additional details	See mage-tab files linked to series entry for additional details	GPL96	Mervi,,Heiskanen	mervi.heiskanen@nih.gov	2402765175	CBIIT	NCI	9609 Medical Center Drive, 1W378	Rockville	MD	20850	USA	ftp://ftp.ncbi.nlm.nih.gov/geo/samples/GSM1672nnn/GSM1672430/suppl/GSM1672430_NCI_U133A_9L.CEL.gz	ftp://ftp.ncbi.nlm.nih.gov/geo/samples/GSM1672nnn/GSM1672430/suppl/GSM1672430_NCI_U133A_9L.mas5.CHP.gz	22283
GSM1672431	Public on May 02 2015	May 01 2015	May 02 2015	RNA	1	MSKCC	Homo sapiens	disease_state: Lung Adenocarcinoma	Sex: Male	age: 65	race: White	vital_status: Alive	clinical_treatment_adjuvant_chemo: No	clinical_treatment_adjuvant_rt: No	disease_stage: pN0pT1	first_progression_or_relapse: Yes	months_to_first_progression: 37	mths_to_last_clinical_assessment: 92	months_to_last_contact_or_death: 92	smoking_history: Currently smoking	surgical_margins: ALL MARGINS PATHOLOGICALLY NEGATIVE	organism_part: Lung	histologic_grade: Moderate Differentiation	total RNA	See mage-tab files linked to series entry for additional details	biotin	See mage-tab files linked to series entry for additional details	9606	See mage-tab files linked to series entry for additional details	See mage-tab files linked to series entry for additional details	See mage-tab files linked to series entry for additional details	GPL96	Mervi,,Heiskanen	mervi.heiskanen@nih.gov	2402765175	CBIIT	NCI	9609 Medical Center Drive, 1W378	Rockville	MD	20850	USA	ftp://ftp.ncbi.nlm.nih.gov/geo/samples/GSM1672nnn/GSM1672431/suppl/GSM1672431_NCI_U133A_10L.CEL.gz	ftp://ftp.ncbi.nlm.nih.gov/geo/samples/GSM1672nnn/GSM1672431/suppl/GSM1672431_NCI_U133A_10L.mas5.CHP.gz	22283
GSM1672432	Public on May 02 2015	May 01 2015	May 02 2015	RNA	1	MSKCC	Homo sapiens	disease_state: Lung Adenocarcinoma	Sex: Male	age: 62	race: White	vital_status: Alive	clinical_treatment_adjuvant_chemo: No	clinical_treatment_adjuvant_rt: No	disease_stage: pN0pT1	first_progression_or_relapse: No	months_to_first_progression: --	mths_to_last_clinical_assessment: 65	months_to_last_contact_or_death: 65	smoking_history: Smoked in the past	surgical_margins: ALL MARGINS PATHOLOGICALLY NEGATIVE	organism_part: Lung	histologic_grade: --	total RNA	See mage-tab files linked to series entry for additional details	biotin	See mage-tab files linked to series entry for additional details	9606	See mage-tab files linked to series entry for additional details	See mage-tab files linked to series entry for additional details	See mage-tab files linked to series entry for additional details	GPL96	Mervi,,Heiskanen	mervi.heiskanen@nih.gov	2402765175	CBIIT	NCI	9609 Medical Center Drive, 1W378	Rockville	MD	20850	USA	ftp://ftp.ncbi.nlm.nih.gov/geo/samples/GSM1672nnn/GSM1672432/suppl/GSM1672432_NCI_U133A_11L.CEL.gz	ftp://ftp.ncbi.nlm.nih.gov/geo/samples/GSM1672nnn/GSM1672432/suppl/GSM1672432_NCI_U133A_11L.mas5.CHP.gz	22283
GSM1672433	Public on May 02 2015	May 01 2015	May 02 2015	RNA	1	MSKCC	Homo sapiens	disease_state: Lung Adenocarcinoma	Sex: Male	age: 71	race: White	vital_status: Alive	clinical_treatment_adjuvant_chemo: Yes	clinical_treatment_adjuvant_rt: Yes	disease_stage: pN2pT2	first_progression_or_relapse: Yes	months_to_first_progression: 13	mths_to_last_clinical_assessment: 43	months_to_last_contact_or_death: 43	smoking_history: Smoked in the past	surgical_margins: ALL MARGINS PATHOLOGICALLY NEGATIVE	organism_part: Lung	histologic_grade: POORLY DIFFERENTIATED	total RNA	See mage-tab files linked to series entry for additional details	biotin	See mage-tab files linked to series entry for additional details	9606	See mage-tab files linked to series entry for additional details	See mage-tab files linked to series entry for additional details	See mage-tab files linked to series entry for additional details	GPL96	Mervi,,Heiskanen	mervi.heiskanen@nih.gov	2402765175	CBIIT	NCI	9609 Medical Center Drive, 1W378	Rockville	MD	20850	USA	ftp://ftp.ncbi.nlm.nih.gov/geo/samples/GSM1672nnn/GSM1672433/suppl/GSM1672433_NCI_U133A_12L.CEL.gz	ftp://ftp.ncbi.nlm.nih.gov/geo/samples/GSM1672nnn/GSM1672433/suppl/GSM1672433_NCI_U133A_12L.mas5.CHP.gz	22283
GSM1672434	Public on May 02 2015	May 01 2015	May 02 2015	RNA	1	MSKCC	Homo sapiens	disease_state: Lung Adenocarcinoma	Sex: Female	age: 82	race: White	vital_status: Alive	clinical_treatment_adjuvant_chemo: No	clinical_treatment_adjuvant_rt: No	disease_stage: pN0pT1	first_progression_or_relapse: No	months_to_first_progression: --	mths_to_last_clinical_assessment: 4	months_to_last_contact_or_death: 69	smoking_history: Currently smoking	surgical_margins: ALL MARGINS PATHOLOGICALLY NEGATIVE	organism_part: Lung	histologic_grade: POORLY DIFFERENTIATED	total RNA	See mage-tab files linked to series entry for additional details	biotin	See mage-tab files linked to series entry for additional details	9606	See mage-tab files linked to series entry for additional details	See mage-tab files linked to series entry for additional details	See mage-tab files linked to series entry for additional details	GPL96	Mervi,,Heiskanen	mervi.heiskanen@nih.gov	2402765175	CBIIT	NCI	9609 Medical Center Drive, 1W378	Rockville	MD	20850	USA	ftp://ftp.ncbi.nlm.nih.gov/geo/samples/GSM1672nnn/GSM1672434/suppl/GSM1672434_NCI_U133A_13L.CEL.gz	ftp://ftp.ncbi.nlm.nih.gov/geo/samples/GSM1672nnn/GSM1672434/suppl/GSM1672434_NCI_U133A_13L.mas5.CHP.gz	22283
GSM1672435	Public on May 02 2015	May 01 2015	May 02 2015	RNA	1	MSKCC	Homo sapiens	disease_state: Lung Adenocarcinoma	Sex: Male	age: 68	race: White	vital_status: Dead	clinical_treatment_adjuvant_chemo: No	clinical_treatment_adjuvant_rt: Yes	disease_stage: pN0pT2	first_progression_or_relapse: Yes	months_to_first_progression: 23	mths_to_last_clinical_assessment: 33	months_to_last_contact_or_death: 40	smoking_history: Smoked in the past	surgical_margins: ALL MARGINS PATHOLOGICALLY NEGATIVE	organism_part: Lung	histologic_grade: POORLY DIFFERENTIATED	total RNA	See mage-tab files linked to series entry for additional details	biotin	See mage-tab files linked to series entry for additional details	9606	See mage-tab files linked to series entry for additional details	See mage-tab files linked to series entry for additional details	See mage-tab files linked to series entry for additional details	GPL96	Mervi,,Heiskanen	mervi.heiskanen@nih.gov	2402765175	CBIIT	NCI	9609 Medical Center Drive, 1W378	Rockville	MD	20850	USA	ftp://ftp.ncbi.nlm.nih.gov/geo/samples/GSM1672nnn/GSM1672435/suppl/GSM1672435_NCI_U133A_14L.CEL.gz	ftp://ftp.ncbi.nlm.nih.gov/geo/samples/GSM1672nnn/GSM1672435/suppl/GSM1672435_NCI_U133A_14L.mas5.CHP.gz	22283
GSM1672436	Public on May 02 2015	May 01 2015	May 02 2015	RNA	1	MSKCC	Homo sapiens	disease_state: Lung Adenocarcinoma	Sex: Female	age: 48	race: White	vital_status: Dead	clinical_treatment_adjuvant_chemo: No	clinical_treatment_adjuvant_rt: No	disease_stage: pN2pT2	first_progression_or_relapse: No	months_to_first_progression: --	mths_to_last_clinical_assessment: 21	months_to_last_contact_or_death: 21	smoking_history: Never smoked	surgical_margins: ALL MARGINS PATHOLOGICALLY NEGATIVE	organism_part: Lung	histologic_grade: POORLY DIFFERENTIATED	total RNA	See mage-tab files linked to series entry for additional details	biotin	See mage-tab files linked to series entry for additional details	9606	See mage-tab files linked to series entry for additional details	See mage-tab files linked to series entry for additional details	See mage-tab files linked to series entry for additional details	GPL96	Mervi,,Heiskanen	mervi.heiskanen@nih.gov	2402765175	CBIIT	NCI	9609 Medical Center Drive, 1W378	Rockville	MD	20850	USA	ftp://ftp.ncbi.nlm.nih.gov/geo/samples/GSM1672nnn/GSM1672436/suppl/GSM1672436_NCI_U133A_15L.CEL.gz	ftp://ftp.ncbi.nlm.nih.gov/geo/samples/GSM1672nnn/GSM1672436/suppl/GSM1672436_NCI_U133A_15L.mas5.CHP.gz	22283
GSM1672437	Public on May 02 2015	May 01 2015	May 02 2015	RNA	1	MSKCC	Homo sapiens	disease_state: Lung Adenocarcinoma	Sex: Female	age: 82	race: White	vital_status: Dead	clinical_treatment_adjuvant_chemo: Yes	clinical_treatment_adjuvant_rt: Yes	disease_stage: pN0pT2	first_progression_or_relapse: Yes	months_to_first_progression: 6	mths_to_last_clinical_assessment: 26	months_to_last_contact_or_death: 29	smoking_history: Smoked in the past	surgical_margins: ALL MARGINS PATHOLOGICALLY NEGATIVE	organism_part: Lung	histologic_grade: POORLY DIFFERENTIATED	total RNA	See mage-tab files linked to series entry for additional details	biotin	See mage-tab files linked to series entry for additional details	9606	See mage-tab files linked to series entry for additional details	See mage-tab files linked to series entry for additional details	See mage-tab files linked to series entry for additional details	GPL96	Mervi,,Heiskanen	mervi.heiskanen@nih.gov	2402765175	CBIIT	NCI	9609 Medical Center Drive, 1W378	Rockville	MD	20850	USA	ftp://ftp.ncbi.nlm.nih.gov/geo/samples/GSM1672nnn/GSM1672437/suppl/GSM1672437_NCI_U133A_16L.CEL.gz	ftp://ftp.ncbi.nlm.nih.gov/geo/samples/GSM1672nnn/GSM1672437/suppl/GSM1672437_NCI_U133A_16L.mas5.CHP.gz	22283
GSM1672438	Public on May 02 2015	May 01 2015	May 02 2015	RNA	1	MSKCC	Homo sapiens	disease_state: Lung Adenocarcinoma	Sex: Male	age: 64	race: White	vital_status: Dead	clinical_treatment_adjuvant_chemo: Yes	clinical_treatment_adjuvant_rt: Yes	disease_stage: pN2pT2	first_progression_or_relapse: Yes	months_to_first_progression: 10	mths_to_last_clinical_assessment: 26	months_to_last_contact_or_death: 26	smoking_history: Smoked in the past	surgical_margins: ALL MARGINS PATHOLOGICALLY NEGATIVE	organism_part: Lung	histologic_grade: POORLY DIFFERENTIATED	total RNA	See mage-tab files linked to series entry for additional details	biotin	See mage-tab files linked to series entry for additional details	9606	See mage-tab files linked to series entry for additional details	See mage-tab files linked to series entry for additional details	See mage-tab files linked to series entry for additional details	GPL96	Mervi,,Heiskanen	mervi.heiskanen@nih.gov	2402765175	CBIIT	NCI	9609 Medical Center Drive, 1W378	Rockville	MD	20850	USA	ftp://ftp.ncbi.nlm.nih.gov/geo/samples/GSM1672nnn/GSM1672438/suppl/GSM1672438_NCI_U133A_17L.CEL.gz	ftp://ftp.ncbi.nlm.nih.gov/geo/samples/GSM1672nnn/GSM1672438/suppl/GSM1672438_NCI_U133A_17L.mas5.CHP.gz	22283
GSM1672439	Public on May 02 2015	May 01 2015	May 02 2015	RNA	1	MSKCC	Homo sapiens	disease_state: Lung Adenocarcinoma	Sex: Male	age: 68	race: White	vital_status: Alive	clinical_treatment_adjuvant_chemo: No	clinical_treatment_adjuvant_rt: No	disease_stage: pN0pT2	first_progression_or_relapse: Yes	months_to_first_progression: 37	mths_to_last_clinical_assessment: 73	months_to_last_contact_or_death: 77	smoking_history: Smoked in the past	surgical_margins: ALL MARGINS PATHOLOGICALLY NEGATIVE	organism_part: Lung	histologic_grade: POORLY DIFFERENTIATED	total RNA	See mage-tab files linked to series entry for additional details	biotin	See mage-tab files linked to series entry for additional details	9606	See mage-tab files linked to series entry for additional details	See mage-tab files linked to series entry for additional details	See mage-tab files linked to series entry for additional details	GPL96	Mervi,,Heiskanen	mervi.heiskanen@nih.gov	2402765175	CBIIT	NCI	9609 Medical Center Drive, 1W378	Rockville	MD	20850	USA	ftp://ftp.ncbi.nlm.nih.gov/geo/samples/GSM1672nnn/GSM1672439/suppl/GSM1672439_NCI_U133A_18L.CEL.gz	ftp://ftp.ncbi.nlm.nih.gov/geo/samples/GSM1672nnn/GSM1672439/suppl/GSM1672439_NCI_U133A_18L.mas5.CHP.gz	22283
GSM1672440	Public on May 02 2015	May 01 2015	May 02 2015	RNA	1	MSKCC	Homo sapiens	disease_state: Lung Adenocarcinoma	Sex: Male	age: 58	race: White	vital_status: Dead	clinical_treatment_adjuvant_chemo: No	clinical_treatment_adjuvant_rt: Yes	disease_stage: pN2pT2	first_progression_or_relapse: Yes	months_to_first_progression: 1	mths_to_last_clinical_assessment: 2	months_to_last_contact_or_death: 2	smoking_history: Smoked in the past	surgical_margins: MICROSCOPICALLY POSITIVE MARGINS OR MICROSCOPIC RESIDUAL DISEASE	organism_part: Lung	histologic_grade: POORLY DIFFERENTIATED	total RNA	See mage-tab files linked to series entry for additional details	biotin	See mage-tab files linked to series entry for additional details	9606	See mage-tab files linked to series entry for additional details	See mage-tab files linked to series entry for additional details	See mage-tab files linked to series entry for additional details	GPL96	Mervi,,Heiskanen	mervi.heiskanen@nih.gov	2402765175	CBIIT	NCI	9609 Medical Center Drive, 1W378	Rockville	MD	20850	USA	ftp://ftp.ncbi.nlm.nih.gov/geo/samples/GSM1672nnn/GSM1672440/suppl/GSM1672440_NCI_U133A_19L.CEL.gz	ftp://ftp.ncbi.nlm.nih.gov/geo/samples/GSM1672nnn/GSM1672440/suppl/GSM1672440_NCI_U133A_19L.mas5.CHP.gz	22283
GSM1672441	Public on May 02 2015	May 01 2015	May 02 2015	RNA	1	MSKCC	Homo sapiens	disease_state: Lung Adenocarcinoma	Sex: Male	age: 73	race: White	vital_status: Alive	clinical_treatment_adjuvant_chemo: No	clinical_treatment_adjuvant_rt: No	disease_stage: pN0pT1	first_progression_or_relapse: Yes	months_to_first_progression: 37	mths_to_last_clinical_assessment: 66	months_to_last_contact_or_death: 66	smoking_history: Smoked in the past	surgical_margins: ALL MARGINS PATHOLOGICALLY NEGATIVE	organism_part: Lung	histologic_grade: Moderate Differentiation	total RNA	See mage-tab files linked to series entry for additional details	biotin	See mage-tab files linked to series entry for additional details	9606	See mage-tab files linked to series entry for additional details	See mage-tab files linked to series entry for additional details	See mage-tab files linked to series entry for additional details	GPL96	Mervi,,Heiskanen	mervi.heiskanen@nih.gov	2402765175	CBIIT	NCI	9609 Medical Center Drive, 1W378	Rockville	MD	20850	USA	ftp://ftp.ncbi.nlm.nih.gov/geo/samples/GSM1672nnn/GSM1672441/suppl/GSM1672441_NCI_U133A_20L.CEL.gz	ftp://ftp.ncbi.nlm.nih.gov/geo/samples/GSM1672nnn/GSM1672441/suppl/GSM1672441_NCI_U133A_20L.mas5.CHP.gz	22283
GSM1672442	Public on May 02 2015	May 01 2015	May 02 2015	RNA	1	MSKCC	Homo sapiens	disease_state: Lung Adenocarcinoma	Sex: Female	age: 52	race: White	vital_status: Dead	clinical_treatment_adjuvant_chemo: Yes	clinical_treatment_adjuvant_rt: Yes	disease_stage: pN2pT2	first_progression_or_relapse: Yes	months_to_first_progression: 8	mths_to_last_clinical_assessment: 8	months_to_last_contact_or_death: 14	smoking_history: Currently smoking	surgical_margins: ALL MARGINS PATHOLOGICALLY NEGATIVE	organism_part: Lung	histologic_grade: POORLY DIFFERENTIATED	total RNA	See mage-tab files linked to series entry for additional details	biotin	See mage-tab files linked to series entry for additional details	9606	See mage-tab files linked to series entry for additional details	See mage-tab files linked to series entry for additional details	See mage-tab files linked to series entry for additional details	GPL96	Mervi,,Heiskanen	mervi.heiskanen@nih.gov	2402765175	CBIIT	NCI	9609 Medical Center Drive, 1W378	Rockville	MD	20850	USA	ftp://ftp.ncbi.nlm.nih.gov/geo/samples/GSM1672nnn/GSM1672442/suppl/GSM1672442_NCI_U133A_21L.CEL.gz	ftp://ftp.ncbi.nlm.nih.gov/geo/samples/GSM1672nnn/GSM1672442/suppl/GSM1672442_NCI_U133A_21L.mas5.CHP.gz	22283
GSM1672443	Public on May 02 2015	May 01 2015	May 02 2015	RNA	1	MSKCC	Homo sapiens	disease_state: Lung Adenocarcinoma	Sex: Male	age: 62	race: White	vital_status: Alive	clinical_treatment_adjuvant_chemo: No	clinical_treatment_adjuvant_rt: No	disease_stage: pN0pT2	first_progression_or_relapse: No	months_to_first_progression: --	mths_to_last_clinical_assessment: 33	months_to_last_contact_or_death: 33	smoking_history: Smoked in the past	surgical_margins: ALL MARGINS PATHOLOGICALLY NEGATIVE	organism_part: Lung	histologic_grade: Moderate Differentiation	total RNA	See mage-tab files linked to series entry for additional details	biotin	See mage-tab files linked to series entry for additional details	9606	See mage-tab files linked to series entry for additional details	See mage-tab files linked to series entry for additional details	See mage-tab files linked to series entry for additional details	GPL96	Mervi,,Heiskanen	mervi.heiskanen@nih.gov	2402765175	CBIIT	NCI	9609 Medical Center Drive, 1W378	Rockville	MD	20850	USA	ftp://ftp.ncbi.nlm.nih.gov/geo/samples/GSM1672nnn/GSM1672443/suppl/GSM1672443_NCI_U133A_22L.CEL.gz	ftp://ftp.ncbi.nlm.nih.gov/geo/samples/GSM1672nnn/GSM1672443/suppl/GSM1672443_NCI_U133A_22L.mas5.CHP.gz	22283
GSM1672444	Public on May 02 2015	May 01 2015	May 02 2015	RNA	1	MSKCC	Homo sapiens	disease_state: Lung Adenocarcinoma	Sex: Male	age: 51	race: White	vital_status: Alive	clinical_treatment_adjuvant_chemo: No	clinical_treatment_adjuvant_rt: No	disease_stage: pN0pT2	first_progression_or_relapse: No	months_to_first_progression: --	mths_to_last_clinical_assessment: 85	months_to_last_contact_or_death: 85	smoking_history: Currently smoking	surgical_margins: ALL MARGINS PATHOLOGICALLY NEGATIVE	organism_part: Lung	histologic_grade: POORLY DIFFERENTIATED	total RNA	See mage-tab files linked to series entry for additional details	biotin	See mage-tab files linked to series entry for additional details	9606	See mage-tab files linked to series entry for additional details	See mage-tab files linked to series entry for additional details	See mage-tab files linked to series entry for additional details	GPL96	Mervi,,Heiskanen	mervi.heiskanen@nih.gov	2402765175	CBIIT	NCI	9609 Medical Center Drive, 1W378	Rockville	MD	20850	USA	ftp://ftp.ncbi.nlm.nih.gov/geo/samples/GSM1672nnn/GSM1672444/suppl/GSM1672444_NCI_U133A_23L.CEL.gz	ftp://ftp.ncbi.nlm.nih.gov/geo/samples/GSM1672nnn/GSM1672444/suppl/GSM1672444_NCI_U133A_23L.mas5.CHP.gz	22283
GSM1672445	Public on May 02 2015	May 01 2015	May 02 2015	RNA	1	MSKCC	Homo sapiens	disease_state: Lung Adenocarcinoma	Sex: Male	age: 62	race: Black or African American	vital_status: Alive	clinical_treatment_adjuvant_chemo: No	clinical_treatment_adjuvant_rt: Yes	disease_stage: pN0pT2	first_progression_or_relapse: Yes	months_to_first_progression: 35	mths_to_last_clinical_assessment: 66	months_to_last_contact_or_death: 66	smoking_history: Smoked in the past	surgical_margins: ALL MARGINS PATHOLOGICALLY NEGATIVE	organism_part: Lung	histologic_grade: WELL DIFFERENTIATED	total RNA	See mage-tab files linked to series entry for additional details	biotin	See mage-tab files linked to series entry for additional details	9606	See mage-tab files linked to series entry for additional details	See mage-tab files linked to series entry for additional details	See mage-tab files linked to series entry for additional details	GPL96	Mervi,,Heiskanen	mervi.heiskanen@nih.gov	2402765175	CBIIT	NCI	9609 Medical Center Drive, 1W378	Rockville	MD	20850	USA	ftp://ftp.ncbi.nlm.nih.gov/geo/samples/GSM1672nnn/GSM1672445/suppl/GSM1672445_NCI_U133A_24L.CEL.gz	ftp://ftp.ncbi.nlm.nih.gov/geo/samples/GSM1672nnn/GSM1672445/suppl/GSM1672445_NCI_U133A_24L.mas5.CHP.gz	22283
GSM1672446	Public on May 02 2015	May 01 2015	May 02 2015	RNA	1	MSKCC	Homo sapiens	disease_state: Lung Adenocarcinoma	Sex: Female	age: 50	race: White	vital_status: Alive	clinical_treatment_adjuvant_chemo: No	clinical_treatment_adjuvant_rt: No	disease_stage: pN0pT1	first_progression_or_relapse: No	months_to_first_progression: --	mths_to_last_clinical_assessment: 15	months_to_last_contact_or_death: 15	smoking_history: Currently smoking	surgical_margins: ALL MARGINS PATHOLOGICALLY NEGATIVE	organism_part: Lung	histologic_grade: Moderate Differentiation	total RNA	See mage-tab files linked to series entry for additional details	biotin	See mage-tab files linked to series entry for additional details	9606	See mage-tab files linked to series entry for additional details	See mage-tab files linked to series entry for additional details	See mage-tab files linked to series entry for additional details	GPL96	Mervi,,Heiskanen	mervi.heiskanen@nih.gov	2402765175	CBIIT	NCI	9609 Medical Center Drive, 1W378	Rockville	MD	20850	USA	ftp://ftp.ncbi.nlm.nih.gov/geo/samples/GSM1672nnn/GSM1672446/suppl/GSM1672446_NCI_U133A_25L.CEL.gz	ftp://ftp.ncbi.nlm.nih.gov/geo/samples/GSM1672nnn/GSM1672446/suppl/GSM1672446_NCI_U133A_25L.mas5.CHP.gz	22283
GSM1672447	Public on May 02 2015	May 01 2015	May 02 2015	RNA	1	MSKCC	Homo sapiens	disease_state: Lung Adenocarcinoma	Sex: Male	age: 65	race: Asian	vital_status: Alive	clinical_treatment_adjuvant_chemo: No	clinical_treatment_adjuvant_rt: No	disease_stage: pN0pT2	first_progression_or_relapse: No	months_to_first_progression: --	mths_to_last_clinical_assessment: 91	months_to_last_contact_or_death: 91	smoking_history: Currently smoking	surgical_margins: ALL MARGINS PATHOLOGICALLY NEGATIVE	organism_part: Lung	histologic_grade: POORLY DIFFERENTIATED	total RNA	See mage-tab files linked to series entry for additional details	biotin	See mage-tab files linked to series entry for additional details	9606	See mage-tab files linked to series entry for additional details	See mage-tab files linked to series entry for additional details	See mage-tab files linked to series entry for additional details	GPL96	Mervi,,Heiskanen	mervi.heiskanen@nih.gov	2402765175	CBIIT	NCI	9609 Medical Center Drive, 1W378	Rockville	MD	20850	USA	ftp://ftp.ncbi.nlm.nih.gov/geo/samples/GSM1672nnn/GSM1672447/suppl/GSM1672447_NCI_U133A_26L.CEL.gz	ftp://ftp.ncbi.nlm.nih.gov/geo/samples/GSM1672nnn/GSM1672447/suppl/GSM1672447_NCI_U133A_26L.mas5.CHP.gz	22283
GSM1672448	Public on May 02 2015	May 01 2015	May 02 2015	RNA	1	MSKCC	Homo sapiens	disease_state: Lung Adenocarcinoma	Sex: Male	age: 74	race: White	vital_status: Dead	clinical_treatment_adjuvant_chemo: Yes	clinical_treatment_adjuvant_rt: No	disease_stage: pN0pT2	first_progression_or_relapse: Yes	months_to_first_progression: 39	mths_to_last_clinical_assessment: 67	months_to_last_contact_or_death: 68	smoking_history: Smoked in the past	surgical_margins: ALL MARGINS PATHOLOGICALLY NEGATIVE	organism_part: Lung	histologic_grade: Moderate Differentiation	total RNA	See mage-tab files linked to series entry for additional details	biotin	See mage-tab files linked to series entry for additional details	9606	See mage-tab files linked to series entry for additional details	See mage-tab files linked to series entry for additional details	See mage-tab files linked to series entry for additional details	GPL96	Mervi,,Heiskanen	mervi.heiskanen@nih.gov	2402765175	CBIIT	NCI	9609 Medical Center Drive, 1W378	Rockville	MD	20850	USA	ftp://ftp.ncbi.nlm.nih.gov/geo/samples/GSM1672nnn/GSM1672448/suppl/GSM1672448_NCI_U133A_27L.CEL.gz	ftp://ftp.ncbi.nlm.nih.gov/geo/samples/GSM1672nnn/GSM1672448/suppl/GSM1672448_NCI_U133A_27L.mas5.CHP.gz	22283
GSM1672449	Public on May 02 2015	May 01 2015	May 02 2015	RNA	1	MSKCC	Homo sapiens	disease_state: Lung Adenocarcinoma	Sex: Female	age: 55	race: White	vital_status: Alive	clinical_treatment_adjuvant_chemo: No	clinical_treatment_adjuvant_rt: No	disease_stage: pN1pT2	first_progression_or_relapse: No	months_to_first_progression: --	mths_to_last_clinical_assessment: 33	months_to_last_contact_or_death: 33	smoking_history: Smoked in the past	surgical_margins: ALL MARGINS PATHOLOGICALLY NEGATIVE	organism_part: Lung	histologic_grade: --	total RNA	See mage-tab files linked to series entry for additional details	biotin	See mage-tab files linked to series entry for additional details	9606	See mage-tab files linked to series entry for additional details	See mage-tab files linked to series entry for additional details	See mage-tab files linked to series entry for additional details	GPL96	Mervi,,Heiskanen	mervi.heiskanen@nih.gov	2402765175	CBIIT	NCI	9609 Medical Center Drive, 1W378	Rockville	MD	20850	USA	ftp://ftp.ncbi.nlm.nih.gov/geo/samples/GSM1672nnn/GSM1672449/suppl/GSM1672449_NCI_U133A_28L.CEL.gz	ftp://ftp.ncbi.nlm.nih.gov/geo/samples/GSM1672nnn/GSM1672449/suppl/GSM1672449_NCI_U133A_28L.mas5.CHP.gz	22283
GSM1672450	Public on May 02 2015	May 01 2015	May 02 2015	RNA	1	MSKCC	Homo sapiens	disease_state: Lung Adenocarcinoma	Sex: Male	age: 54	race: White	vital_status: Dead	clinical_treatment_adjuvant_chemo: Yes	clinical_treatment_adjuvant_rt: Yes	disease_stage: pN2pT3	first_progression_or_relapse: Yes	months_to_first_progression: 8	mths_to_last_clinical_assessment: 24	months_to_last_contact_or_death: 24	smoking_history: Smoked in the past	surgical_margins: ALL MARGINS PATHOLOGICALLY NEGATIVE	organism_part: Lung	histologic_grade: POORLY DIFFERENTIATED	total RNA	See mage-tab files linked to series entry for additional details	biotin	See mage-tab files linked to series entry for additional details	9606	See mage-tab files linked to series entry for additional details	See mage-tab files linked to series entry for additional details	See mage-tab files linked to series entry for additional details	GPL96	Mervi,,Heiskanen	mervi.heiskanen@nih.gov	2402765175	CBIIT	NCI	9609 Medical Center Drive, 1W378	Rockville	MD	20850	USA	ftp://ftp.ncbi.nlm.nih.gov/geo/samples/GSM1672nnn/GSM1672450/suppl/GSM1672450_NCI_U133A_29L.CEL.gz	ftp://ftp.ncbi.nlm.nih.gov/geo/samples/GSM1672nnn/GSM1672450/suppl/GSM1672450_NCI_U133A_29L.mas5.CHP.gz	22283
GSM1672451	Public on May 02 2015	May 01 2015	May 02 2015	RNA	1	MSKCC	Homo sapiens	disease_state: Lung Adenocarcinoma	Sex: Male	age: 76	race: White	vital_status: Alive	clinical_treatment_adjuvant_chemo: No	clinical_treatment_adjuvant_rt: No	disease_stage: pN0pT1	first_progression_or_relapse: No	months_to_first_progression: --	mths_to_last_clinical_assessment: 62	months_to_last_contact_or_death: 62	smoking_history: Smoked in the past	surgical_margins: ALL MARGINS PATHOLOGICALLY NEGATIVE	organism_part: Lung	histologic_grade: Moderate Differentiation	total RNA	See mage-tab files linked to series entry for additional details	biotin	See mage-tab files linked to series entry for additional details	9606	See mage-tab files linked to series entry for additional details	See mage-tab files linked to series entry for additional details	See mage-tab files linked to series entry for additional details	GPL96	Mervi,,Heiskanen	mervi.heiskanen@nih.gov	2402765175	CBIIT	NCI	9609 Medical Center Drive, 1W378	Rockville	MD	20850	USA	ftp://ftp.ncbi.nlm.nih.gov/geo/samples/GSM1672nnn/GSM1672451/suppl/GSM1672451_NCI_U133A_30L.CEL.gz	ftp://ftp.ncbi.nlm.nih.gov/geo/samples/GSM1672nnn/GSM1672451/suppl/GSM1672451_NCI_U133A_30L.mas5.CHP.gz	22283
GSM1672452	Public on May 02 2015	May 01 2015	May 02 2015	RNA	1	MSKCC	Homo sapiens	disease_state: Lung Adenocarcinoma	Sex: Female	age: 64	race: White	vital_status: Dead	clinical_treatment_adjuvant_chemo: Yes	clinical_treatment_adjuvant_rt: Yes	disease_stage: pN2pT2	first_progression_or_relapse: Yes	months_to_first_progression: 1	mths_to_last_clinical_assessment: 114	months_to_last_contact_or_death: 114	smoking_history: Smoked in the past	surgical_margins: ALL MARGINS PATHOLOGICALLY NEGATIVE	organism_part: Lung	histologic_grade: POORLY DIFFERENTIATED	total RNA	See mage-tab files linked to series entry for additional details	biotin	See mage-tab files linked to series entry for additional details	9606	See mage-tab files linked to series entry for additional details	See mage-tab files linked to series entry for additional details	See mage-tab files linked to series entry for additional details	GPL96	Mervi,,Heiskanen	mervi.heiskanen@nih.gov	2402765175	CBIIT	NCI	9609 Medical Center Drive, 1W378	Rockville	MD	20850	USA	ftp://ftp.ncbi.nlm.nih.gov/geo/samples/GSM1672nnn/GSM1672452/suppl/GSM1672452_NCI_U133A_31L.CEL.gz	ftp://ftp.ncbi.nlm.nih.gov/geo/samples/GSM1672nnn/GSM1672452/suppl/GSM1672452_NCI_U133A_31L.mas5.CHP.gz	22283
GSM1672453	Public on May 02 2015	May 01 2015	May 02 2015	RNA	1	MSKCC	Homo sapiens	disease_state: Lung Adenocarcinoma	Sex: Female	age: 58	race: White	vital_status: Dead	clinical_treatment_adjuvant_chemo: No	clinical_treatment_adjuvant_rt: No	disease_stage: pN2pT2	first_progression_or_relapse: No	months_to_first_progression: --	mths_to_last_clinical_assessment: 4	months_to_last_contact_or_death: 4	smoking_history: Smoked in the past	surgical_margins: ALL MARGINS PATHOLOGICALLY NEGATIVE	organism_part: Lung	histologic_grade: POORLY DIFFERENTIATED	total RNA	See mage-tab files linked to series entry for additional details	biotin	See mage-tab files linked to series entry for additional details	9606	See mage-tab files linked to series entry for additional details	See mage-tab files linked to series entry for additional details	See mage-tab files linked to series entry for additional details	GPL96	Mervi,,Heiskanen	mervi.heiskanen@nih.gov	2402765175	CBIIT	NCI	9609 Medical Center Drive, 1W378	Rockville	MD	20850	USA	ftp://ftp.ncbi.nlm.nih.gov/geo/samples/GSM1672nnn/GSM1672453/suppl/GSM1672453_NCI_U133A_32L.CEL.gz	ftp://ftp.ncbi.nlm.nih.gov/geo/samples/GSM1672nnn/GSM1672453/suppl/GSM1672453_NCI_U133A_32L.mas5.CHP.gz	22283
GSM1672454	Public on May 02 2015	May 01 2015	May 02 2015	RNA	1	MSKCC	Homo sapiens	disease_state: Lung Adenocarcinoma	Sex: Male	age: 70	race: White	vital_status: Dead	clinical_treatment_adjuvant_chemo: Yes	clinical_treatment_adjuvant_rt: Yes	disease_stage: pN1pT2	first_progression_or_relapse: Yes	months_to_first_progression: 13	mths_to_last_clinical_assessment: 20	months_to_last_contact_or_death: 20	smoking_history: Smoked in the past	surgical_margins: ALL MARGINS PATHOLOGICALLY NEGATIVE	organism_part: Lung	histologic_grade: Moderate Differentiation	total RNA	See mage-tab files linked to series entry for additional details	biotin	See mage-tab files linked to series entry for additional details	9606	See mage-tab files linked to series entry for additional details	See mage-tab files linked to series entry for additional details	See mage-tab files linked to series entry for additional details	GPL96	Mervi,,Heiskanen	mervi.heiskanen@nih.gov	2402765175	CBIIT	NCI	9609 Medical Center Drive, 1W378	Rockville	MD	20850	USA	ftp://ftp.ncbi.nlm.nih.gov/geo/samples/GSM1672nnn/GSM1672454/suppl/GSM1672454_NCI_U133A_33L.CEL.gz	ftp://ftp.ncbi.nlm.nih.gov/geo/samples/GSM1672nnn/GSM1672454/suppl/GSM1672454_NCI_U133A_33L.mas5.CHP.gz	22283
GSM1672455	Public on May 02 2015	May 01 2015	May 02 2015	RNA	1	MSKCC	Homo sapiens	disease_state: Lung Adenocarcinoma	Sex: Female	age: 57	race: White	vital_status: Dead	clinical_treatment_adjuvant_chemo: Yes	clinical_treatment_adjuvant_rt: Yes	disease_stage: pN2pT2	first_progression_or_relapse: Yes	months_to_first_progression: 23	mths_to_last_clinical_assessment: 50	months_to_last_contact_or_death: 52	smoking_history: Smoked in the past	surgical_margins: ALL MARGINS PATHOLOGICALLY NEGATIVE	organism_part: Lung	histologic_grade: --	total RNA	See mage-tab files linked to series entry for additional details	biotin	See mage-tab files linked to series entry for additional details	9606	See mage-tab files linked to series entry for additional details	See mage-tab files linked to series entry for additional details	See mage-tab files linked to series entry for additional details	GPL96	Mervi,,Heiskanen	mervi.heiskanen@nih.gov	2402765175	CBIIT	NCI	9609 Medical Center Drive, 1W378	Rockville	MD	20850	USA	ftp://ftp.ncbi.nlm.nih.gov/geo/samples/GSM1672nnn/GSM1672455/suppl/GSM1672455_NCI_U133A_34L.CEL.gz	ftp://ftp.ncbi.nlm.nih.gov/geo/samples/GSM1672nnn/GSM1672455/suppl/GSM1672455_NCI_U133A_34L.mas5.CHP.gz	22283
GSM1672456	Public on May 02 2015	May 01 2015	May 02 2015	RNA	1	MSKCC	Homo sapiens	disease_state: Lung Adenocarcinoma	Sex: Female	age: 67	race: White	vital_status: Alive	clinical_treatment_adjuvant_chemo: Yes	clinical_treatment_adjuvant_rt: Yes	disease_stage: pN1pT2	first_progression_or_relapse: No	months_to_first_progression: --	mths_to_last_clinical_assessment: 93	months_to_last_contact_or_death: 93	smoking_history: Smoked in the past	surgical_margins: ALL MARGINS PATHOLOGICALLY NEGATIVE	organism_part: Lung	histologic_grade: Moderate Differentiation	total RNA	See mage-tab files linked to series entry for additional details	biotin	See mage-tab files linked to series entry for additional details	9606	See mage-tab files linked to series entry for additional details	See mage-tab files linked to series entry for additional details	See mage-tab files linked to series entry for additional details	GPL96	Mervi,,Heiskanen	mervi.heiskanen@nih.gov	2402765175	CBIIT	NCI	9609 Medical Center Drive, 1W378	Rockville	MD	20850	USA	ftp://ftp.ncbi.nlm.nih.gov/geo/samples/GSM1672nnn/GSM1672456/suppl/GSM1672456_NCI_U133A_35L.CEL.gz	ftp://ftp.ncbi.nlm.nih.gov/geo/samples/GSM1672nnn/GSM1672456/suppl/GSM1672456_NCI_U133A_35L.mas5.CHP.gz	22283
GSM1672457	Public on May 02 2015	May 01 2015	May 02 2015	RNA	1	MSKCC	Homo sapiens	disease_state: Lung Adenocarcinoma	Sex: Female	age: 74	race: White	vital_status: Dead	clinical_treatment_adjuvant_chemo: No	clinical_treatment_adjuvant_rt: No	disease_stage: pN0pT2	first_progression_or_relapse: No	months_to_first_progression: --	mths_to_last_clinical_assessment: 12	months_to_last_contact_or_death: 14	smoking_history: Currently smoking	surgical_margins: ALL MARGINS PATHOLOGICALLY NEGATIVE	organism_part: Lung	histologic_grade: POORLY DIFFERENTIATED	total RNA	See mage-tab files linked to series entry for additional details	biotin	See mage-tab files linked to series entry for additional details	9606	See mage-tab files linked to series entry for additional details	See mage-tab files linked to series entry for additional details	See mage-tab files linked to series entry for additional details	GPL96	Mervi,,Heiskanen	mervi.heiskanen@nih.gov	2402765175	CBIIT	NCI	9609 Medical Center Drive, 1W378	Rockville	MD	20850	USA	ftp://ftp.ncbi.nlm.nih.gov/geo/samples/GSM1672nnn/GSM1672457/suppl/GSM1672457_NCI_U133A_37L_Rep.CEL.gz	ftp://ftp.ncbi.nlm.nih.gov/geo/samples/GSM1672nnn/GSM1672457/suppl/GSM1672457_NCI_U133A_37L_Rep.mas5.CHP.gz	22283
GSM1672458	Public on May 02 2015	May 01 2015	May 02 2015	RNA	1	MSKCC	Homo sapiens	disease_state: Lung Adenocarcinoma	Sex: Female	age: 59	race: White	vital_status: Alive	clinical_treatment_adjuvant_chemo: Yes	clinical_treatment_adjuvant_rt: No	disease_stage: pN1pT2	first_progression_or_relapse: Yes	months_to_first_progression: 19	mths_to_last_clinical_assessment: 37	months_to_last_contact_or_death: 100	smoking_history: Never smoked	surgical_margins: ALL MARGINS PATHOLOGICALLY NEGATIVE	organism_part: Lung	histologic_grade: POORLY DIFFERENTIATED	total RNA	See mage-tab files linked to series entry for additional details	biotin	See mage-tab files linked to series entry for additional details	9606	See mage-tab files linked to series entry for additional details	See mage-tab files linked to series entry for additional details	See mage-tab files linked to series entry for additional details	GPL96	Mervi,,Heiskanen	mervi.heiskanen@nih.gov	2402765175	CBIIT	NCI	9609 Medical Center Drive, 1W378	Rockville	MD	20850	USA	ftp://ftp.ncbi.nlm.nih.gov/geo/samples/GSM1672nnn/GSM1672458/suppl/GSM1672458_NCI_U133A_38L.CEL.gz	ftp://ftp.ncbi.nlm.nih.gov/geo/samples/GSM1672nnn/GSM1672458/suppl/GSM1672458_NCI_U133A_38L.mas5.CHP.gz	22283
GSM1672459	Public on May 02 2015	May 01 2015	May 02 2015	RNA	1	MSKCC	Homo sapiens	disease_state: Lung Adenocarcinoma	Sex: Female	age: 66	race: White	vital_status: Alive	clinical_treatment_adjuvant_chemo: No	clinical_treatment_adjuvant_rt: No	disease_stage: pN0pT2	first_progression_or_relapse: No	months_to_first_progression: --	mths_to_last_clinical_assessment: 32	months_to_last_contact_or_death: 33	smoking_history: Smoked in the past	surgical_margins: ALL MARGINS PATHOLOGICALLY NEGATIVE	organism_part: Lung	histologic_grade: WELL DIFFERENTIATED	total RNA	See mage-tab files linked to series entry for additional details	biotin	See mage-tab files linked to series entry for additional details	9606	See mage-tab files linked to series entry for additional details	See mage-tab files linked to series entry for additional details	See mage-tab files linked to series entry for additional details	GPL96	Mervi,,Heiskanen	mervi.heiskanen@nih.gov	2402765175	CBIIT	NCI	9609 Medical Center Drive, 1W378	Rockville	MD	20850	USA	ftp://ftp.ncbi.nlm.nih.gov/geo/samples/GSM1672nnn/GSM1672459/suppl/GSM1672459_NCI_U133A_39L.CEL.gz	ftp://ftp.ncbi.nlm.nih.gov/geo/samples/GSM1672nnn/GSM1672459/suppl/GSM1672459_NCI_U133A_39L.mas5.CHP.gz	22283
GSM1672460	Public on May 02 2015	May 01 2015	May 02 2015	RNA	1	MSKCC	Homo sapiens	disease_state: Lung Adenocarcinoma	Sex: Male	age: 67	race: White	vital_status: Dead	clinical_treatment_adjuvant_chemo: Yes	clinical_treatment_adjuvant_rt: No	disease_stage: pN1pT1	first_progression_or_relapse: Yes	months_to_first_progression: 21	mths_to_last_clinical_assessment: 31	months_to_last_contact_or_death: 32	smoking_history: Never smoked	surgical_margins: ALL MARGINS PATHOLOGICALLY NEGATIVE	organism_part: Lung	histologic_grade: Moderate Differentiation	total RNA	See mage-tab files linked to series entry for additional details	biotin	See mage-tab files linked to series entry for additional details	9606	See mage-tab files linked to series entry for additional details	See mage-tab files linked to series entry for additional details	See mage-tab files linked to series entry for additional details	GPL96	Mervi,,Heiskanen	mervi.heiskanen@nih.gov	2402765175	CBIIT	NCI	9609 Medical Center Drive, 1W378	Rockville	MD	20850	USA	ftp://ftp.ncbi.nlm.nih.gov/geo/samples/GSM1672nnn/GSM1672460/suppl/GSM1672460_NCI_U133A_40L.CEL.gz	ftp://ftp.ncbi.nlm.nih.gov/geo/samples/GSM1672nnn/GSM1672460/suppl/GSM1672460_NCI_U133A_40L.mas5.CHP.gz	22283
GSM1672461	Public on May 02 2015	May 01 2015	May 02 2015	RNA	1	MSKCC	Homo sapiens	disease_state: Lung Adenocarcinoma	Sex: Female	age: 57	race: White	vital_status: Alive	clinical_treatment_adjuvant_chemo: No	clinical_treatment_adjuvant_rt: No	disease_stage: pN0pT1	first_progression_or_relapse: No	months_to_first_progression: --	mths_to_last_clinical_assessment: 60	months_to_last_contact_or_death: 60	smoking_history: Smoked in the past	surgical_margins: ALL MARGINS PATHOLOGICALLY NEGATIVE	organism_part: Lung	histologic_grade: Moderate Differentiation	total RNA	See mage-tab files linked to series entry for additional details	biotin	See mage-tab files linked to series entry for additional details	9606	See mage-tab files linked to series entry for additional details	See mage-tab files linked to series entry for additional details	See mage-tab files linked to series entry for additional details	GPL96	Mervi,,Heiskanen	mervi.heiskanen@nih.gov	2402765175	CBIIT	NCI	9609 Medical Center Drive, 1W378	Rockville	MD	20850	USA	ftp://ftp.ncbi.nlm.nih.gov/geo/samples/GSM1672nnn/GSM1672461/suppl/GSM1672461_NCI_U133A_41L.CEL.gz	ftp://ftp.ncbi.nlm.nih.gov/geo/samples/GSM1672nnn/GSM1672461/suppl/GSM1672461_NCI_U133A_41L.mas5.CHP.gz	22283
GSM1672462	Public on May 02 2015	May 01 2015	May 02 2015	RNA	1	MSKCC	Homo sapiens	disease_state: Lung Adenocarcinoma	Sex: Male	age: 64	race: White	vital_status: Alive	clinical_treatment_adjuvant_chemo: No	clinical_treatment_adjuvant_rt: No	disease_stage: pN0pT2	first_progression_or_relapse: No	months_to_first_progression: --	mths_to_last_clinical_assessment: 50	months_to_last_contact_or_death: 50	smoking_history: Smoked in the past	surgical_margins: ALL MARGINS PATHOLOGICALLY NEGATIVE	organism_part: Lung	histologic_grade: Moderate Differentiation	total RNA	See mage-tab files linked to series entry for additional details	biotin	See mage-tab files linked to series entry for additional details	9606	See mage-tab files linked to series entry for additional details	See mage-tab files linked to series entry for additional details	See mage-tab files linked to series entry for additional details	GPL96	Mervi,,Heiskanen	mervi.heiskanen@nih.gov	2402765175	CBIIT	NCI	9609 Medical Center Drive, 1W378	Rockville	MD	20850	USA	ftp://ftp.ncbi.nlm.nih.gov/geo/samples/GSM1672nnn/GSM1672462/suppl/GSM1672462_NCI_U133A_42L.CEL.gz	ftp://ftp.ncbi.nlm.nih.gov/geo/samples/GSM1672nnn/GSM1672462/suppl/GSM1672462_NCI_U133A_42L.mas5.CHP.gz	22283
GSM1672463	Public on May 02 2015	May 01 2015	May 02 2015	RNA	1	MSKCC	Homo sapiens	disease_state: Lung Adenocarcinoma	Sex: Female	age: 59	race: Black or African American	vital_status: Dead	clinical_treatment_adjuvant_chemo: No	clinical_treatment_adjuvant_rt: Yes	disease_stage: pN0pT2	first_progression_or_relapse: Yes	months_to_first_progression: 7	mths_to_last_clinical_assessment: 13	months_to_last_contact_or_death: 15	smoking_history: Smoked in the past	surgical_margins: ALL MARGINS PATHOLOGICALLY NEGATIVE	organism_part: Lung	histologic_grade: POORLY DIFFERENTIATED	total RNA	See mage-tab files linked to series entry for additional details	biotin	See mage-tab files linked to series entry for additional details	9606	See mage-tab files linked to series entry for additional details	See mage-tab files linked to series entry for additional details	See mage-tab files linked to series entry for additional details	GPL96	Mervi,,Heiskanen	mervi.heiskanen@nih.gov	2402765175	CBIIT	NCI	9609 Medical Center Drive, 1W378	Rockville	MD	20850	USA	ftp://ftp.ncbi.nlm.nih.gov/geo/samples/GSM1672nnn/GSM1672463/suppl/GSM1672463_NCI_U133A_43L.CEL.gz	ftp://ftp.ncbi.nlm.nih.gov/geo/samples/GSM1672nnn/GSM1672463/suppl/GSM1672463_NCI_U133A_43L.mas5.CHP.gz	22283
GSM1672464	Public on May 02 2015	May 01 2015	May 02 2015	RNA	1	MSKCC	Homo sapiens	disease_state: Lung Adenocarcinoma	Sex: Female	age: 76	race: White	vital_status: Alive	clinical_treatment_adjuvant_chemo: No	clinical_treatment_adjuvant_rt: No	disease_stage: pN0pT2	first_progression_or_relapse: No	months_to_first_progression: --	mths_to_last_clinical_assessment: 37	months_to_last_contact_or_death: 37	smoking_history: Never smoked	surgical_margins: ALL MARGINS PATHOLOGICALLY NEGATIVE	organism_part: Lung	histologic_grade: Moderate Differentiation	total RNA	See mage-tab files linked to series entry for additional details	biotin	See mage-tab files linked to series entry for additional details	9606	See mage-tab files linked to series entry for additional details	See mage-tab files linked to series entry for additional details	See mage-tab files linked to series entry for additional details	GPL96	Mervi,,Heiskanen	mervi.heiskanen@nih.gov	2402765175	CBIIT	NCI	9609 Medical Center Drive, 1W378	Rockville	MD	20850	USA	ftp://ftp.ncbi.nlm.nih.gov/geo/samples/GSM1672nnn/GSM1672464/suppl/GSM1672464_NCI_U133A_44L.CEL.gz	ftp://ftp.ncbi.nlm.nih.gov/geo/samples/GSM1672nnn/GSM1672464/suppl/GSM1672464_NCI_U133A_44L.mas5.CHP.gz	22283
GSM1672465	Public on May 02 2015	May 01 2015	May 02 2015	RNA	1	MSKCC	Homo sapiens	disease_state: Lung Adenocarcinoma	Sex: Female	age: 82	race: White	vital_status: Alive	clinical_treatment_adjuvant_chemo: No	clinical_treatment_adjuvant_rt: No	disease_stage: pN0pT2	first_progression_or_relapse: No	months_to_first_progression: --	mths_to_last_clinical_assessment: 54	months_to_last_contact_or_death: 54	smoking_history: Smoked in the past	surgical_margins: ALL MARGINS PATHOLOGICALLY NEGATIVE	organism_part: Lung	histologic_grade: WELL DIFFERENTIATED	total RNA	See mage-tab files linked to series entry for additional details	biotin	See mage-tab files linked to series entry for additional details	9606	See mage-tab files linked to series entry for additional details	See mage-tab files linked to series entry for additional details	See mage-tab files linked to series entry for additional details	GPL96	Mervi,,Heiskanen	mervi.heiskanen@nih.gov	2402765175	CBIIT	NCI	9609 Medical Center Drive, 1W378	Rockville	MD	20850	USA	ftp://ftp.ncbi.nlm.nih.gov/geo/samples/GSM1672nnn/GSM1672465/suppl/GSM1672465_NCI_U133A_45L.CEL.gz	ftp://ftp.ncbi.nlm.nih.gov/geo/samples/GSM1672nnn/GSM1672465/suppl/GSM1672465_NCI_U133A_45L.mas5.CHP.gz	22283
GSM1672466	Public on May 02 2015	May 01 2015	May 02 2015	RNA	1	MSKCC	Homo sapiens	disease_state: Lung Adenocarcinoma	Sex: Male	age: 58	race: White	vital_status: Alive	clinical_treatment_adjuvant_chemo: No	clinical_treatment_adjuvant_rt: No	disease_stage: pN0pT1	first_progression_or_relapse: No	months_to_first_progression: --	mths_to_last_clinical_assessment: 31	months_to_last_contact_or_death: 31	smoking_history: Smoked in the past	surgical_margins: ALL MARGINS PATHOLOGICALLY NEGATIVE	organism_part: Lung	histologic_grade: Moderate Differentiation	total RNA	See mage-tab files linked to series entry for additional details	biotin	See mage-tab files linked to series entry for additional details	9606	See mage-tab files linked to series entry for additional details	See mage-tab files linked to series entry for additional details	See mage-tab files linked to series entry for additional details	GPL96	Mervi,,Heiskanen	mervi.heiskanen@nih.gov	2402765175	CBIIT	NCI	9609 Medical Center Drive, 1W378	Rockville	MD	20850	USA	ftp://ftp.ncbi.nlm.nih.gov/geo/samples/GSM1672nnn/GSM1672466/suppl/GSM1672466_NCI_U133A_46L.CEL.gz	ftp://ftp.ncbi.nlm.nih.gov/geo/samples/GSM1672nnn/GSM1672466/suppl/GSM1672466_NCI_U133A_46L.mas5.CHP.gz	22283
GSM1672467	Public on May 02 2015	May 01 2015	May 02 2015	RNA	1	MSKCC	Homo sapiens	disease_state: Lung Adenocarcinoma	Sex: Male	age: 65	race: White	vital_status: Alive	clinical_treatment_adjuvant_chemo: No	clinical_treatment_adjuvant_rt: No	disease_stage: pN0pT2	first_progression_or_relapse: No	months_to_first_progression: --	mths_to_last_clinical_assessment: 38	months_to_last_contact_or_death: 38	smoking_history: Currently smoking	surgical_margins: ALL MARGINS PATHOLOGICALLY NEGATIVE	organism_part: Lung	histologic_grade: --	total RNA	See mage-tab files linked to series entry for additional details	biotin	See mage-tab files linked to series entry for additional details	9606	See mage-tab files linked to series entry for additional details	See mage-tab files linked to series entry for additional details	See mage-tab files linked to series entry for additional details	GPL96	Mervi,,Heiskanen	mervi.heiskanen@nih.gov	2402765175	CBIIT	NCI	9609 Medical Center Drive, 1W378	Rockville	MD	20850	USA	ftp://ftp.ncbi.nlm.nih.gov/geo/samples/GSM1672nnn/GSM1672467/suppl/GSM1672467_NCI_U133A_47L.CEL.gz	ftp://ftp.ncbi.nlm.nih.gov/geo/samples/GSM1672nnn/GSM1672467/suppl/GSM1672467_NCI_U133A_47L.mas5.CHP.gz	22283
GSM1672468	Public on May 02 2015	May 01 2015	May 02 2015	RNA	1	MSKCC	Homo sapiens	disease_state: Lung Adenocarcinoma	Sex: Female	age: 49	race: White	vital_status: Alive	clinical_treatment_adjuvant_chemo: No	clinical_treatment_adjuvant_rt: No	disease_stage: pN2pT1	first_progression_or_relapse: No	months_to_first_progression: --	mths_to_last_clinical_assessment: 90	months_to_last_contact_or_death: 115	smoking_history: Never smoked	surgical_margins: ALL MARGINS PATHOLOGICALLY NEGATIVE	organism_part: Lung	histologic_grade: Moderate Differentiation	total RNA	See mage-tab files linked to series entry for additional details	biotin	See mage-tab files linked to series entry for additional details	9606	See mage-tab files linked to series entry for additional details	See mage-tab files linked to series entry for additional details	See mage-tab files linked to series entry for additional details	GPL96	Mervi,,Heiskanen	mervi.heiskanen@nih.gov	2402765175	CBIIT	NCI	9609 Medical Center Drive, 1W378	Rockville	MD	20850	USA	ftp://ftp.ncbi.nlm.nih.gov/geo/samples/GSM1672nnn/GSM1672468/suppl/GSM1672468_NCI_U133A_48L.CEL.gz	ftp://ftp.ncbi.nlm.nih.gov/geo/samples/GSM1672nnn/GSM1672468/suppl/GSM1672468_NCI_U133A_48L.mas5.CHP.gz	22283
GSM1672469	Public on May 02 2015	May 01 2015	May 02 2015	RNA	1	MSKCC	Homo sapiens	disease_state: Lung Adenocarcinoma	Sex: Female	age: 71	race: White	vital_status: Alive	clinical_treatment_adjuvant_chemo: No	clinical_treatment_adjuvant_rt: No	disease_stage: pN2pT2	first_progression_or_relapse: Yes	months_to_first_progression: 10	mths_to_last_clinical_assessment: 34	months_to_last_contact_or_death: 36	smoking_history: Smoked in the past	surgical_margins: ALL MARGINS PATHOLOGICALLY NEGATIVE	organism_part: Lung	histologic_grade: Moderate Differentiation	total RNA	See mage-tab files linked to series entry for additional details	biotin	See mage-tab files linked to series entry for additional details	9606	See mage-tab files linked to series entry for additional details	See mage-tab files linked to series entry for additional details	See mage-tab files linked to series entry for additional details	GPL96	Mervi,,Heiskanen	mervi.heiskanen@nih.gov	2402765175	CBIIT	NCI	9609 Medical Center Drive, 1W378	Rockville	MD	20850	USA	ftp://ftp.ncbi.nlm.nih.gov/geo/samples/GSM1672nnn/GSM1672469/suppl/GSM1672469_NCI_U133A_49L.CEL.gz	ftp://ftp.ncbi.nlm.nih.gov/geo/samples/GSM1672nnn/GSM1672469/suppl/GSM1672469_NCI_U133A_49L.mas5.CHP.gz	22283
GSM1672470	Public on May 02 2015	May 01 2015	May 02 2015	RNA	1	MSKCC	Homo sapiens	disease_state: Lung Adenocarcinoma	Sex: Female	age: 61	race: White	vital_status: Dead	clinical_treatment_adjuvant_chemo: Yes	clinical_treatment_adjuvant_rt: No	disease_stage: pN0pT1	first_progression_or_relapse: No	months_to_first_progression: --	mths_to_last_clinical_assessment: 44	months_to_last_contact_or_death: 48	smoking_history: Smoked in the past	surgical_margins: ALL MARGINS PATHOLOGICALLY NEGATIVE	organism_part: Lung	histologic_grade: POORLY DIFFERENTIATED	total RNA	See mage-tab files linked to series entry for additional details	biotin	See mage-tab files linked to series entry for additional details	9606	See mage-tab files linked to series entry for additional details	See mage-tab files linked to series entry for additional details	See mage-tab files linked to series entry for additional details	GPL96	Mervi,,Heiskanen	mervi.heiskanen@nih.gov	2402765175	CBIIT	NCI	9609 Medical Center Drive, 1W378	Rockville	MD	20850	USA	ftp://ftp.ncbi.nlm.nih.gov/geo/samples/GSM1672nnn/GSM1672470/suppl/GSM1672470_NCI_U133A_50L.CEL.gz	ftp://ftp.ncbi.nlm.nih.gov/geo/samples/GSM1672nnn/GSM1672470/suppl/GSM1672470_NCI_U133A_50L.mas5.CHP.gz	22283
GSM1672471	Public on May 02 2015	May 01 2015	May 02 2015	RNA	1	MSKCC	Homo sapiens	disease_state: Lung Adenocarcinoma	Sex: Male	age: 75	race: White	vital_status: Dead	clinical_treatment_adjuvant_chemo: Yes	clinical_treatment_adjuvant_rt: Yes	disease_stage: pN2pT2	first_progression_or_relapse: Yes	months_to_first_progression: 9	mths_to_last_clinical_assessment: 17	months_to_last_contact_or_death: 19	smoking_history: Smoked in the past	surgical_margins: ALL MARGINS PATHOLOGICALLY NEGATIVE	organism_part: Lung	histologic_grade: WELL DIFFERENTIATED	total RNA	See mage-tab files linked to series entry for additional details	biotin	See mage-tab files linked to series entry for additional details	9606	See mage-tab files linked to series entry for additional details	See mage-tab files linked to series entry for additional details	See mage-tab files linked to series entry for additional details	GPL96	Mervi,,Heiskanen	mervi.heiskanen@nih.gov	2402765175	CBIIT	NCI	9609 Medical Center Drive, 1W378	Rockville	MD	20850	USA	ftp://ftp.ncbi.nlm.nih.gov/geo/samples/GSM1672nnn/GSM1672471/suppl/GSM1672471_NCI_U133A_51L.CEL.gz	ftp://ftp.ncbi.nlm.nih.gov/geo/samples/GSM1672nnn/GSM1672471/suppl/GSM1672471_NCI_U133A_51L.mas5.CHP.gz	22283
GSM1672472	Public on May 02 2015	May 01 2015	May 02 2015	RNA	1	MSKCC	Homo sapiens	disease_state: Lung Adenocarcinoma	Sex: Female	age: 46	race: White	vital_status: Alive	clinical_treatment_adjuvant_chemo: No	clinical_treatment_adjuvant_rt: No	disease_stage: pN0pT1	first_progression_or_relapse: No	months_to_first_progression: --	mths_to_last_clinical_assessment: 90	months_to_last_contact_or_death: 91	smoking_history: Smoked in the past	surgical_margins: ALL MARGINS PATHOLOGICALLY NEGATIVE	organism_part: Lung	histologic_grade: Moderate Differentiation	total RNA	See mage-tab files linked to series entry for additional details	biotin	See mage-tab files linked to series entry for additional details	9606	See mage-tab files linked to series entry for additional details	See mage-tab files linked to series entry for additional details	See mage-tab files linked to series entry for additional details	GPL96	Mervi,,Heiskanen	mervi.heiskanen@nih.gov	2402765175	CBIIT	NCI	9609 Medical Center Drive, 1W378	Rockville	MD	20850	USA	ftp://ftp.ncbi.nlm.nih.gov/geo/samples/GSM1672nnn/GSM1672472/suppl/GSM1672472_NCI_U133A_52L.CEL.gz	ftp://ftp.ncbi.nlm.nih.gov/geo/samples/GSM1672nnn/GSM1672472/suppl/GSM1672472_NCI_U133A_52L.mas5.CHP.gz	22283
GSM1672473	Public on May 02 2015	May 01 2015	May 02 2015	RNA	1	MSKCC	Homo sapiens	disease_state: Lung Adenocarcinoma	Sex: Female	age: 74	race: Asian	vital_status: Dead	clinical_treatment_adjuvant_chemo: No	clinical_treatment_adjuvant_rt: No	disease_stage: pN0pT2	first_progression_or_relapse: No	months_to_first_progression: --	mths_to_last_clinical_assessment: 65	months_to_last_contact_or_death: 204	smoking_history: Smoked in the past	surgical_margins: ALL MARGINS PATHOLOGICALLY NEGATIVE	organism_part: Lung	histologic_grade: POORLY DIFFERENTIATED	total RNA	See mage-tab files linked to series entry for additional details	biotin	See mage-tab files linked to series entry for additional details	9606	See mage-tab files linked to series entry for additional details	See mage-tab files linked to series entry for additional details	See mage-tab files linked to series entry for additional details	GPL96	Mervi,,Heiskanen	mervi.heiskanen@nih.gov	2402765175	CBIIT	NCI	9609 Medical Center Drive, 1W378	Rockville	MD	20850	USA	ftp://ftp.ncbi.nlm.nih.gov/geo/samples/GSM1672nnn/GSM1672473/suppl/GSM1672473_NCI_U133A_53L.CEL.gz	ftp://ftp.ncbi.nlm.nih.gov/geo/samples/GSM1672nnn/GSM1672473/suppl/GSM1672473_NCI_U133A_53L.mas5.CHP.gz	22283
GSM1672474	Public on May 02 2015	May 01 2015	May 02 2015	RNA	1	MSKCC	Homo sapiens	disease_state: Lung Adenocarcinoma	Sex: Female	age: 51	race: White	vital_status: Alive	clinical_treatment_adjuvant_chemo: No	clinical_treatment_adjuvant_rt: No	disease_stage: pN1pT2	first_progression_or_relapse: No	months_to_first_progression: --	mths_to_last_clinical_assessment: 50	months_to_last_contact_or_death: 50	smoking_history: Never smoked	surgical_margins: ALL MARGINS PATHOLOGICALLY NEGATIVE	organism_part: Lung	histologic_grade: Moderate Differentiation	total RNA	See mage-tab files linked to series entry for additional details	biotin	See mage-tab files linked to series entry for additional details	9606	See mage-tab files linked to series entry for additional details	See mage-tab files linked to series entry for additional details	See mage-tab files linked to series entry for additional details	GPL96	Mervi,,Heiskanen	mervi.heiskanen@nih.gov	2402765175	CBIIT	NCI	9609 Medical Center Drive, 1W378	Rockville	MD	20850	USA	ftp://ftp.ncbi.nlm.nih.gov/geo/samples/GSM1672nnn/GSM1672474/suppl/GSM1672474_NCI_U133A_54L.CEL.gz	ftp://ftp.ncbi.nlm.nih.gov/geo/samples/GSM1672nnn/GSM1672474/suppl/GSM1672474_NCI_U133A_54L.mas5.CHP.gz	22283
GSM1672475	Public on May 02 2015	May 01 2015	May 02 2015	RNA	1	MSKCC	Homo sapiens	disease_state: Lung Adenocarcinoma	Sex: Male	age: 54	race: White	vital_status: Alive	clinical_treatment_adjuvant_chemo: No	clinical_treatment_adjuvant_rt: No	disease_stage: pN0pT1	first_progression_or_relapse: No	months_to_first_progression: --	mths_to_last_clinical_assessment: 80	months_to_last_contact_or_death: 80	smoking_history: Smoked in the past	surgical_margins: ALL MARGINS PATHOLOGICALLY NEGATIVE	organism_part: Lung	histologic_grade: POORLY DIFFERENTIATED	total RNA	See mage-tab files linked to series entry for additional details	biotin	See mage-tab files linked to series entry for additional details	9606	See mage-tab files linked to series entry for additional details	See mage-tab files linked to series entry for additional details	See mage-tab files linked to series entry for additional details	GPL96	Mervi,,Heiskanen	mervi.heiskanen@nih.gov	2402765175	CBIIT	NCI	9609 Medical Center Drive, 1W378	Rockville	MD	20850	USA	ftp://ftp.ncbi.nlm.nih.gov/geo/samples/GSM1672nnn/GSM1672475/suppl/GSM1672475_NCI_U133A_55L.CEL.gz	ftp://ftp.ncbi.nlm.nih.gov/geo/samples/GSM1672nnn/GSM1672475/suppl/GSM1672475_NCI_U133A_55L.mas5.CHP.gz	22283
GSM1672476	Public on May 02 2015	May 01 2015	May 02 2015	RNA	1	MSKCC	Homo sapiens	disease_state: Lung Adenocarcinoma	Sex: Female	age: 50	race: White	vital_status: Dead	clinical_treatment_adjuvant_chemo: Yes	clinical_treatment_adjuvant_rt: Yes	disease_stage: pN2pT2	first_progression_or_relapse: Yes	months_to_first_progression: 27	mths_to_last_clinical_assessment: 34	months_to_last_contact_or_death: 42	smoking_history: Smoked in the past	surgical_margins: ALL MARGINS PATHOLOGICALLY NEGATIVE	organism_part: Lung	histologic_grade: POORLY DIFFERENTIATED	total RNA	See mage-tab files linked to series entry for additional details	biotin	See mage-tab files linked to series entry for additional details	9606	See mage-tab files linked to series entry for additional details	See mage-tab files linked to series entry for additional details	See mage-tab files linked to series entry for additional details	GPL96	Mervi,,Heiskanen	mervi.heiskanen@nih.gov	2402765175	CBIIT	NCI	9609 Medical Center Drive, 1W378	Rockville	MD	20850	USA	ftp://ftp.ncbi.nlm.nih.gov/geo/samples/GSM1672nnn/GSM1672476/suppl/GSM1672476_NCI_U133A_56L.CEL.gz	ftp://ftp.ncbi.nlm.nih.gov/geo/samples/GSM1672nnn/GSM1672476/suppl/GSM1672476_NCI_U133A_56L.mas5.CHP.gz	22283
GSM1672477	Public on May 02 2015	May 01 2015	May 02 2015	RNA	1	MSKCC	Homo sapiens	disease_state: Lung Adenocarcinoma	Sex: Female	age: 69	race: White	vital_status: Alive	clinical_treatment_adjuvant_chemo: No	clinical_treatment_adjuvant_rt: No	disease_stage: pN0pT2	first_progression_or_relapse: No	months_to_first_progression: --	mths_to_last_clinical_assessment: 60	months_to_last_contact_or_death: 60	smoking_history: Smoked in the past	surgical_margins: ALL MARGINS PATHOLOGICALLY NEGATIVE	organism_part: Lung	histologic_grade: POORLY DIFFERENTIATED	total RNA	See mage-tab files linked to series entry for additional details	biotin	See mage-tab files linked to series entry for additional details	9606	See mage-tab files linked to series entry for additional details	See mage-tab files linked to series entry for additional details	See mage-tab files linked to series entry for additional details	GPL96	Mervi,,Heiskanen	mervi.heiskanen@nih.gov	2402765175	CBIIT	NCI	9609 Medical Center Drive, 1W378	Rockville	MD	20850	USA	ftp://ftp.ncbi.nlm.nih.gov/geo/samples/GSM1672nnn/GSM1672477/suppl/GSM1672477_NCI_U133A_57L.CEL.gz	ftp://ftp.ncbi.nlm.nih.gov/geo/samples/GSM1672nnn/GSM1672477/suppl/GSM1672477_NCI_U133A_57L.mas5.CHP.gz	22283
GSM1672478	Public on May 02 2015	May 01 2015	May 02 2015	RNA	1	MSKCC	Homo sapiens	disease_state: Lung Adenocarcinoma	Sex: Female	age: 63	race: White	vital_status: Alive	clinical_treatment_adjuvant_chemo: No	clinical_treatment_adjuvant_rt: No	disease_stage: pN1pT2	first_progression_or_relapse: No	months_to_first_progression: --	mths_to_last_clinical_assessment: 26	months_to_last_contact_or_death: 26	smoking_history: Currently smoking	surgical_margins: ALL MARGINS PATHOLOGICALLY NEGATIVE	organism_part: Lung	histologic_grade: Moderate Differentiation	total RNA	See mage-tab files linked to series entry for additional details	biotin	See mage-tab files linked to series entry for additional details	9606	See mage-tab files linked to series entry for additional details	See mage-tab files linked to series entry for additional details	See mage-tab files linked to series entry for additional details	GPL96	Mervi,,Heiskanen	mervi.heiskanen@nih.gov	2402765175	CBIIT	NCI	9609 Medical Center Drive, 1W378	Rockville	MD	20850	USA	ftp://ftp.ncbi.nlm.nih.gov/geo/samples/GSM1672nnn/GSM1672478/suppl/GSM1672478_NCI_U133A_58L.CEL.gz	ftp://ftp.ncbi.nlm.nih.gov/geo/samples/GSM1672nnn/GSM1672478/suppl/GSM1672478_NCI_U133A_58L.mas5.CHP.gz	22283
GSM1672479	Public on May 02 2015	May 01 2015	May 02 2015	RNA	1	MSKCC	Homo sapiens	disease_state: Lung Adenocarcinoma	Sex: Female	age: 76	race: White	vital_status: Dead	clinical_treatment_adjuvant_chemo: No	clinical_treatment_adjuvant_rt: Yes	disease_stage: pN0pT2	first_progression_or_relapse: Yes	months_to_first_progression: 55	mths_to_last_clinical_assessment: 62	months_to_last_contact_or_death: 62	smoking_history: Smoked in the past	surgical_margins: ALL MARGINS PATHOLOGICALLY NEGATIVE	organism_part: Lung	histologic_grade: POORLY DIFFERENTIATED	total RNA	See mage-tab files linked to series entry for additional details	biotin	See mage-tab files linked to series entry for additional details	9606	See mage-tab files linked to series entry for additional details	See mage-tab files linked to series entry for additional details	See mage-tab files linked to series entry for additional details	GPL96	Mervi,,Heiskanen	mervi.heiskanen@nih.gov	2402765175	CBIIT	NCI	9609 Medical Center Drive, 1W378	Rockville	MD	20850	USA	ftp://ftp.ncbi.nlm.nih.gov/geo/samples/GSM1672nnn/GSM1672479/suppl/GSM1672479_NCI_U133A_59L.CEL.gz	ftp://ftp.ncbi.nlm.nih.gov/geo/samples/GSM1672nnn/GSM1672479/suppl/GSM1672479_NCI_U133A_59L.mas5.CHP.gz	22283
GSM1672480	Public on May 02 2015	May 01 2015	May 02 2015	RNA	1	MSKCC	Homo sapiens	disease_state: Lung Adenocarcinoma	Sex: Female	age: 72	race: White	vital_status: Alive	clinical_treatment_adjuvant_chemo: No	clinical_treatment_adjuvant_rt: No	disease_stage: pN1pT2	first_progression_or_relapse: No	months_to_first_progression: --	mths_to_last_clinical_assessment: 22	months_to_last_contact_or_death: 22	smoking_history: Smoked in the past	surgical_margins: ALL MARGINS PATHOLOGICALLY NEGATIVE	organism_part: Lung	histologic_grade: POORLY DIFFERENTIATED	total RNA	See mage-tab files linked to series entry for additional details	biotin	See mage-tab files linked to series entry for additional details	9606	See mage-tab files linked to series entry for additional details	See mage-tab files linked to series entry for additional details	See mage-tab files linked to series entry for additional details	GPL96	Mervi,,Heiskanen	mervi.heiskanen@nih.gov	2402765175	CBIIT	NCI	9609 Medical Center Drive, 1W378	Rockville	MD	20850	USA	ftp://ftp.ncbi.nlm.nih.gov/geo/samples/GSM1672nnn/GSM1672480/suppl/GSM1672480_NCI_U133A_60L.CEL.gz	ftp://ftp.ncbi.nlm.nih.gov/geo/samples/GSM1672nnn/GSM1672480/suppl/GSM1672480_NCI_U133A_60L.mas5.CHP.gz	22283
GSM1672481	Public on May 02 2015	May 01 2015	May 02 2015	RNA	1	MSKCC	Homo sapiens	disease_state: Lung Adenocarcinoma	Sex: Female	age: 70	race: White	vital_status: Alive	clinical_treatment_adjuvant_chemo: No	clinical_treatment_adjuvant_rt: No	disease_stage: pN0pT1	first_progression_or_relapse: No	months_to_first_progression: --	mths_to_last_clinical_assessment: 63	months_to_last_contact_or_death: 63	smoking_history: Smoked in the past	surgical_margins: ALL MARGINS PATHOLOGICALLY NEGATIVE	organism_part: Lung	histologic_grade: WELL DIFFERENTIATED	total RNA	See mage-tab files linked to series entry for additional details	biotin	See mage-tab files linked to series entry for additional details	9606	See mage-tab files linked to series entry for additional details	See mage-tab files linked to series entry for additional details	See mage-tab files linked to series entry for additional details	GPL96	Mervi,,Heiskanen	mervi.heiskanen@nih.gov	2402765175	CBIIT	NCI	9609 Medical Center Drive, 1W378	Rockville	MD	20850	USA	ftp://ftp.ncbi.nlm.nih.gov/geo/samples/GSM1672nnn/GSM1672481/suppl/GSM1672481_NCI_U133A_61L.CEL.gz	ftp://ftp.ncbi.nlm.nih.gov/geo/samples/GSM1672nnn/GSM1672481/suppl/GSM1672481_NCI_U133A_61L.mas5.CHP.gz	22283
GSM1672482	Public on May 02 2015	May 01 2015	May 02 2015	RNA	1	MSKCC	Homo sapiens	disease_state: Lung Adenocarcinoma	Sex: Male	age: 76	race: White	vital_status: Alive	clinical_treatment_adjuvant_chemo: No	clinical_treatment_adjuvant_rt: No	disease_stage: pN0pT1	first_progression_or_relapse: No	months_to_first_progression: --	mths_to_last_clinical_assessment: 68	months_to_last_contact_or_death: 68	smoking_history: Smoked in the past	surgical_margins: ALL MARGINS PATHOLOGICALLY NEGATIVE	organism_part: Lung	histologic_grade: POORLY DIFFERENTIATED	total RNA	See mage-tab files linked to series entry for additional details	biotin	See mage-tab files linked to series entry for additional details	9606	See mage-tab files linked to series entry for additional details	See mage-tab files linked to series entry for additional details	See mage-tab files linked to series entry for additional details	GPL96	Mervi,,Heiskanen	mervi.heiskanen@nih.gov	2402765175	CBIIT	NCI	9609 Medical Center Drive, 1W378	Rockville	MD	20850	USA	ftp://ftp.ncbi.nlm.nih.gov/geo/samples/GSM1672nnn/GSM1672482/suppl/GSM1672482_NCI_U133A_62L.CEL.gz	ftp://ftp.ncbi.nlm.nih.gov/geo/samples/GSM1672nnn/GSM1672482/suppl/GSM1672482_NCI_U133A_62L.mas5.CHP.gz	22283
GSM1672483	Public on May 02 2015	May 01 2015	May 02 2015	RNA	1	MSKCC	Homo sapiens	disease_state: Lung Adenocarcinoma	Sex: Female	age: 81	race: White	vital_status: Alive	clinical_treatment_adjuvant_chemo: No	clinical_treatment_adjuvant_rt: No	disease_stage: pN0pT1	first_progression_or_relapse: No	months_to_first_progression: --	mths_to_last_clinical_assessment: 7	months_to_last_contact_or_death: 7	smoking_history: Smoked in the past	surgical_margins: ALL MARGINS PATHOLOGICALLY NEGATIVE	organism_part: Lung	histologic_grade: POORLY DIFFERENTIATED	total RNA	See mage-tab files linked to series entry for additional details	biotin	See mage-tab files linked to series entry for additional details	9606	See mage-tab files linked to series entry for additional details	See mage-tab files linked to series entry for additional details	See mage-tab files linked to series entry for additional details	GPL96	Mervi,,Heiskanen	mervi.heiskanen@nih.gov	2402765175	CBIIT	NCI	9609 Medical Center Drive, 1W378	Rockville	MD	20850	USA	ftp://ftp.ncbi.nlm.nih.gov/geo/samples/GSM1672nnn/GSM1672483/suppl/GSM1672483_NCI_U133A_63L.CEL.gz	ftp://ftp.ncbi.nlm.nih.gov/geo/samples/GSM1672nnn/GSM1672483/suppl/GSM1672483_NCI_U133A_63L.mas5.CHP.gz	22283
GSM1672484	Public on May 02 2015	May 01 2015	May 02 2015	RNA	1	MSKCC	Homo sapiens	disease_state: Lung Adenocarcinoma	Sex: Female	age: 61	race: White	vital_status: Dead	clinical_treatment_adjuvant_chemo: Yes	clinical_treatment_adjuvant_rt: Yes	disease_stage: pN0pT2	first_progression_or_relapse: Yes	months_to_first_progression: 19	mths_to_last_clinical_assessment: 52	months_to_last_contact_or_death: 52	smoking_history: Never smoked	surgical_margins: ALL MARGINS PATHOLOGICALLY NEGATIVE	organism_part: Lung	histologic_grade: POORLY DIFFERENTIATED	total RNA	See mage-tab files linked to series entry for additional details	biotin	See mage-tab files linked to series entry for additional details	9606	See mage-tab files linked to series entry for additional details	See mage-tab files linked to series entry for additional details	See mage-tab files linked to series entry for additional details	GPL96	Mervi,,Heiskanen	mervi.heiskanen@nih.gov	2402765175	CBIIT	NCI	9609 Medical Center Drive, 1W378	Rockville	MD	20850	USA	ftp://ftp.ncbi.nlm.nih.gov/geo/samples/GSM1672nnn/GSM1672484/suppl/GSM1672484_NCI_U133A_64L.CEL.gz	ftp://ftp.ncbi.nlm.nih.gov/geo/samples/GSM1672nnn/GSM1672484/suppl/GSM1672484_NCI_U133A_64L.mas5.CHP.gz	22283
GSM1672485	Public on May 02 2015	May 01 2015	May 02 2015	RNA	1	MSKCC	Homo sapiens	disease_state: Lung Adenocarcinoma	Sex: Female	age: 53	race: White	vital_status: Alive	clinical_treatment_adjuvant_chemo: No	clinical_treatment_adjuvant_rt: No	disease_stage: pN0pT1	first_progression_or_relapse: No	months_to_first_progression: --	mths_to_last_clinical_assessment: 36	months_to_last_contact_or_death: 36	smoking_history: Never smoked	surgical_margins: ALL MARGINS PATHOLOGICALLY NEGATIVE	organism_part: Lung	histologic_grade: Moderate Differentiation	total RNA	See mage-tab files linked to series entry for additional details	biotin	See mage-tab files linked to series entry for additional details	9606	See mage-tab files linked to series entry for additional details	See mage-tab files linked to series entry for additional details	See mage-tab files linked to series entry for additional details	GPL96	Mervi,,Heiskanen	mervi.heiskanen@nih.gov	2402765175	CBIIT	NCI	9609 Medical Center Drive, 1W378	Rockville	MD	20850	USA	ftp://ftp.ncbi.nlm.nih.gov/geo/samples/GSM1672nnn/GSM1672485/suppl/GSM1672485_NCI_U133A_65L.CEL.gz	ftp://ftp.ncbi.nlm.nih.gov/geo/samples/GSM1672nnn/GSM1672485/suppl/GSM1672485_NCI_U133A_65L.mas5.CHP.gz	22283
GSM1672486	Public on May 02 2015	May 01 2015	May 02 2015	RNA	1	MSKCC	Homo sapiens	disease_state: Lung Adenocarcinoma	Sex: Female	age: 72	race: White	vital_status: Dead	clinical_treatment_adjuvant_chemo: No	clinical_treatment_adjuvant_rt: Yes	disease_stage: pN1pT2	first_progression_or_relapse: Yes	months_to_first_progression: 5	mths_to_last_clinical_assessment: 15	months_to_last_contact_or_death: 15	smoking_history: Smoked in the past	surgical_margins: ALL MARGINS PATHOLOGICALLY NEGATIVE	organism_part: Lung	histologic_grade: POORLY DIFFERENTIATED	total RNA	See mage-tab files linked to series entry for additional details	biotin	See mage-tab files linked to series entry for additional details	9606	See mage-tab files linked to series entry for additional details	See mage-tab files linked to series entry for additional details	See mage-tab files linked to series entry for additional details	GPL96	Mervi,,Heiskanen	mervi.heiskanen@nih.gov	2402765175	CBIIT	NCI	9609 Medical Center Drive, 1W378	Rockville	MD	20850	USA	ftp://ftp.ncbi.nlm.nih.gov/geo/samples/GSM1672nnn/GSM1672486/suppl/GSM1672486_NCI_U133A_66L.CEL.gz	ftp://ftp.ncbi.nlm.nih.gov/geo/samples/GSM1672nnn/GSM1672486/suppl/GSM1672486_NCI_U133A_66L.mas5.CHP.gz	22283
GSM1672487	Public on May 02 2015	May 01 2015	May 02 2015	RNA	1	MSKCC	Homo sapiens	disease_state: Lung Adenocarcinoma	Sex: Female	age: 53	race: White	vital_status: Dead	clinical_treatment_adjuvant_chemo: No	clinical_treatment_adjuvant_rt: No	disease_stage: pN1pT2	first_progression_or_relapse: Yes	months_to_first_progression: 13	mths_to_last_clinical_assessment: 19	months_to_last_contact_or_death: 20	smoking_history: Smoked in the past	surgical_margins: ALL MARGINS PATHOLOGICALLY NEGATIVE	organism_part: Lung	histologic_grade: POORLY DIFFERENTIATED	total RNA	See mage-tab files linked to series entry for additional details	biotin	See mage-tab files linked to series entry for additional details	9606	See mage-tab files linked to series entry for additional details	See mage-tab files linked to series entry for additional details	See mage-tab files linked to series entry for additional details	GPL96	Mervi,,Heiskanen	mervi.heiskanen@nih.gov	2402765175	CBIIT	NCI	9609 Medical Center Drive, 1W378	Rockville	MD	20850	USA	ftp://ftp.ncbi.nlm.nih.gov/geo/samples/GSM1672nnn/GSM1672487/suppl/GSM1672487_NCI_U133A_67L.CEL.gz	ftp://ftp.ncbi.nlm.nih.gov/geo/samples/GSM1672nnn/GSM1672487/suppl/GSM1672487_NCI_U133A_67L.mas5.CHP.gz	22283
GSM1672488	Public on May 02 2015	May 01 2015	May 02 2015	RNA	1	MSKCC	Homo sapiens	disease_state: Lung Adenocarcinoma	Sex: Male	age: 61	race: White	vital_status: Alive	clinical_treatment_adjuvant_chemo: No	clinical_treatment_adjuvant_rt: No	disease_stage: pN0pT2	first_progression_or_relapse: Yes	months_to_first_progression: 26	mths_to_last_clinical_assessment: 41	months_to_last_contact_or_death: 41	smoking_history: Smoked in the past	surgical_margins: ALL MARGINS PATHOLOGICALLY NEGATIVE	organism_part: Lung	histologic_grade: Moderate Differentiation	total RNA	See mage-tab files linked to series entry for additional details	biotin	See mage-tab files linked to series entry for additional details	9606	See mage-tab files linked to series entry for additional details	See mage-tab files linked to series entry for additional details	See mage-tab files linked to series entry for additional details	GPL96	Mervi,,Heiskanen	mervi.heiskanen@nih.gov	2402765175	CBIIT	NCI	9609 Medical Center Drive, 1W378	Rockville	MD	20850	USA	ftp://ftp.ncbi.nlm.nih.gov/geo/samples/GSM1672nnn/GSM1672488/suppl/GSM1672488_NCI_U133A_68L.CEL.gz	ftp://ftp.ncbi.nlm.nih.gov/geo/samples/GSM1672nnn/GSM1672488/suppl/GSM1672488_NCI_U133A_68L.mas5.CHP.gz	22283
GSM1672489	Public on May 02 2015	May 01 2015	May 02 2015	RNA	1	MSKCC	Homo sapiens	disease_state: Lung Adenocarcinoma	Sex: Male	age: 66	race: White	vital_status: Dead	clinical_treatment_adjuvant_chemo: Yes	clinical_treatment_adjuvant_rt: Yes	disease_stage: pN2pT2	first_progression_or_relapse: Yes	months_to_first_progression: 10	mths_to_last_clinical_assessment: 24	months_to_last_contact_or_death: 25	smoking_history: Unknown	surgical_margins: ALL MARGINS PATHOLOGICALLY NEGATIVE	organism_part: Lung	histologic_grade: Moderate Differentiation	total RNA	See mage-tab files linked to series entry for additional details	biotin	See mage-tab files linked to series entry for additional details	9606	See mage-tab files linked to series entry for additional details	See mage-tab files linked to series entry for additional details	See mage-tab files linked to series entry for additional details	GPL96	Mervi,,Heiskanen	mervi.heiskanen@nih.gov	2402765175	CBIIT	NCI	9609 Medical Center Drive, 1W378	Rockville	MD	20850	USA	ftp://ftp.ncbi.nlm.nih.gov/geo/samples/GSM1672nnn/GSM1672489/suppl/GSM1672489_NCI_U133A_69L.CEL.gz	ftp://ftp.ncbi.nlm.nih.gov/geo/samples/GSM1672nnn/GSM1672489/suppl/GSM1672489_NCI_U133A_69L.mas5.CHP.gz	22283
GSM1672490	Public on May 02 2015	May 01 2015	May 02 2015	RNA	1	MSKCC	Homo sapiens	disease_state: Lung Adenocarcinoma	Sex: Female	age: 74	race: White	vital_status: Alive	clinical_treatment_adjuvant_chemo: No	clinical_treatment_adjuvant_rt: No	disease_stage: pN1pT2	first_progression_or_relapse: No	months_to_first_progression: --	mths_to_last_clinical_assessment: 42	months_to_last_contact_or_death: 42	smoking_history: Currently smoking	surgical_margins: ALL MARGINS PATHOLOGICALLY NEGATIVE	organism_part: Lung	histologic_grade: POORLY DIFFERENTIATED	total RNA	See mage-tab files linked to series entry for additional details	biotin	See mage-tab files linked to series entry for additional details	9606	See mage-tab files linked to series entry for additional details	See mage-tab files linked to series entry for additional details	See mage-tab files linked to series entry for additional details	GPL96	Mervi,,Heiskanen	mervi.heiskanen@nih.gov	2402765175	CBIIT	NCI	9609 Medical Center Drive, 1W378	Rockville	MD	20850	USA	ftp://ftp.ncbi.nlm.nih.gov/geo/samples/GSM1672nnn/GSM1672490/suppl/GSM1672490_NCI_U133A_70L.CEL.gz	ftp://ftp.ncbi.nlm.nih.gov/geo/samples/GSM1672nnn/GSM1672490/suppl/GSM1672490_NCI_U133A_70L.mas5.CHP.gz	22283
GSM1672491	Public on May 02 2015	May 01 2015	May 02 2015	RNA	1	MSKCC	Homo sapiens	disease_state: Lung Adenocarcinoma	Sex: Female	age: 48	race: White	vital_status: Dead	clinical_treatment_adjuvant_chemo: Yes	clinical_treatment_adjuvant_rt: Yes	disease_stage: pN2pT1	first_progression_or_relapse: Yes	months_to_first_progression: 29	mths_to_last_clinical_assessment: 46	months_to_last_contact_or_death: 51	smoking_history: Smoked in the past	surgical_margins: ALL MARGINS PATHOLOGICALLY NEGATIVE	organism_part: Lung	histologic_grade: Moderate Differentiation	total RNA	See mage-tab files linked to series entry for additional details	biotin	See mage-tab files linked to series entry for additional details	9606	See mage-tab files linked to series entry for additional details	See mage-tab files linked to series entry for additional details	See mage-tab files linked to series entry for additional details	GPL96	Mervi,,Heiskanen	mervi.heiskanen@nih.gov	2402765175	CBIIT	NCI	9609 Medical Center Drive, 1W378	Rockville	MD	20850	USA	ftp://ftp.ncbi.nlm.nih.gov/geo/samples/GSM1672nnn/GSM1672491/suppl/GSM1672491_NCI_U133A_71L.CEL.gz	ftp://ftp.ncbi.nlm.nih.gov/geo/samples/GSM1672nnn/GSM1672491/suppl/GSM1672491_NCI_U133A_71L.mas5.CHP.gz	22283
GSM1672492	Public on May 02 2015	May 01 2015	May 02 2015	RNA	1	MSKCC	Homo sapiens	disease_state: Lung Adenocarcinoma	Sex: Female	age: 65	race: White	vital_status: Alive	clinical_treatment_adjuvant_chemo: No	clinical_treatment_adjuvant_rt: No	disease_stage: pN0pT2	first_progression_or_relapse: No	months_to_first_progression: --	mths_to_last_clinical_assessment: 50	months_to_last_contact_or_death: 50	smoking_history: Currently smoking	surgical_margins: ALL MARGINS PATHOLOGICALLY NEGATIVE	organism_part: Lung	histologic_grade: Moderate Differentiation	total RNA	See mage-tab files linked to series entry for additional details	biotin	See mage-tab files linked to series entry for additional details	9606	See mage-tab files linked to series entry for additional details	See mage-tab files linked to series entry for additional details	See mage-tab files linked to series entry for additional details	GPL96	Mervi,,Heiskanen	mervi.heiskanen@nih.gov	2402765175	CBIIT	NCI	9609 Medical Center Drive, 1W378	Rockville	MD	20850	USA	ftp://ftp.ncbi.nlm.nih.gov/geo/samples/GSM1672nnn/GSM1672492/suppl/GSM1672492_NCI_U133A_72L.CEL.gz	ftp://ftp.ncbi.nlm.nih.gov/geo/samples/GSM1672nnn/GSM1672492/suppl/GSM1672492_NCI_U133A_72L.mas5.CHP.gz	22283
GSM1672493	Public on May 02 2015	May 01 2015	May 02 2015	RNA	1	MSKCC	Homo sapiens	disease_state: Lung Adenocarcinoma	Sex: Female	age: 70	race: Black or African American	vital_status: Dead	clinical_treatment_adjuvant_chemo: Yes	clinical_treatment_adjuvant_rt: No	disease_stage: pN0pT2	first_progression_or_relapse: Yes	months_to_first_progression: 5	mths_to_last_clinical_assessment: 55	months_to_last_contact_or_death: 57	smoking_history: Smoked in the past	surgical_margins: ALL MARGINS PATHOLOGICALLY NEGATIVE	organism_part: Lung	histologic_grade: Moderate Differentiation	total RNA	See mage-tab files linked to series entry for additional details	biotin	See mage-tab files linked to series entry for additional details	9606	See mage-tab files linked to series entry for additional details	See mage-tab files linked to series entry for additional details	See mage-tab files linked to series entry for additional details	GPL96	Mervi,,Heiskanen	mervi.heiskanen@nih.gov	2402765175	CBIIT	NCI	9609 Medical Center Drive, 1W378	Rockville	MD	20850	USA	ftp://ftp.ncbi.nlm.nih.gov/geo/samples/GSM1672nnn/GSM1672493/suppl/GSM1672493_NCI_U133A_73L.CEL.gz	ftp://ftp.ncbi.nlm.nih.gov/geo/samples/GSM1672nnn/GSM1672493/suppl/GSM1672493_NCI_U133A_73L.mas5.CHP.gz	22283
GSM1672494	Public on May 02 2015	May 01 2015	May 02 2015	RNA	1	MSKCC	Homo sapiens	disease_state: Lung Adenocarcinoma	Sex: Female	age: 79	race: White	vital_status: Dead	clinical_treatment_adjuvant_chemo: Yes	clinical_treatment_adjuvant_rt: No	disease_stage: pN0pT2	first_progression_or_relapse: Yes	months_to_first_progression: 7	mths_to_last_clinical_assessment: 13	months_to_last_contact_or_death: 13	smoking_history: Currently smoking	surgical_margins: ALL MARGINS PATHOLOGICALLY NEGATIVE	organism_part: Lung	histologic_grade: POORLY DIFFERENTIATED	total RNA	See mage-tab files linked to series entry for additional details	biotin	See mage-tab files linked to series entry for additional details	9606	See mage-tab files linked to series entry for additional details	See mage-tab files linked to series entry for additional details	See mage-tab files linked to series entry for additional details	GPL96	Mervi,,Heiskanen	mervi.heiskanen@nih.gov	2402765175	CBIIT	NCI	9609 Medical Center Drive, 1W378	Rockville	MD	20850	USA	ftp://ftp.ncbi.nlm.nih.gov/geo/samples/GSM1672nnn/GSM1672494/suppl/GSM1672494_NCI_U133A_74L.CEL.gz	ftp://ftp.ncbi.nlm.nih.gov/geo/samples/GSM1672nnn/GSM1672494/suppl/GSM1672494_NCI_U133A_74L.mas5.CHP.gz	22283
GSM1672495	Public on May 02 2015	May 01 2015	May 02 2015	RNA	1	MSKCC	Homo sapiens	disease_state: Lung Adenocarcinoma	Sex: Male	age: 67	race: White	vital_status: Dead	clinical_treatment_adjuvant_chemo: Yes	clinical_treatment_adjuvant_rt: No	disease_stage: pN0pT2	first_progression_or_relapse: Yes	months_to_first_progression: 11	mths_to_last_clinical_assessment: 78	months_to_last_contact_or_death: 78	smoking_history: Smoked in the past	surgical_margins: ALL MARGINS PATHOLOGICALLY NEGATIVE	organism_part: Lung	histologic_grade: WELL DIFFERENTIATED	total RNA	See mage-tab files linked to series entry for additional details	biotin	See mage-tab files linked to series entry for additional details	9606	See mage-tab files linked to series entry for additional details	See mage-tab files linked to series entry for additional details	See mage-tab files linked to series entry for additional details	GPL96	Mervi,,Heiskanen	mervi.heiskanen@nih.gov	2402765175	CBIIT	NCI	9609 Medical Center Drive, 1W378	Rockville	MD	20850	USA	ftp://ftp.ncbi.nlm.nih.gov/geo/samples/GSM1672nnn/GSM1672495/suppl/GSM1672495_NCI_U133A_75L.CEL.gz	ftp://ftp.ncbi.nlm.nih.gov/geo/samples/GSM1672nnn/GSM1672495/suppl/GSM1672495_NCI_U133A_75L.mas5.CHP.gz	22283
GSM1672496	Public on May 02 2015	May 01 2015	May 02 2015	RNA	1	MSKCC	Homo sapiens	disease_state: Lung Adenocarcinoma	Sex: Male	age: 77	race: White	vital_status: Alive	clinical_treatment_adjuvant_chemo: No	clinical_treatment_adjuvant_rt: No	disease_stage: pN0pT2	first_progression_or_relapse: No	months_to_first_progression: --	mths_to_last_clinical_assessment: 48	months_to_last_contact_or_death: 48	smoking_history: Smoked in the past	surgical_margins: ALL MARGINS PATHOLOGICALLY NEGATIVE	organism_part: Lung	histologic_grade: Moderate Differentiation	total RNA	See mage-tab files linked to series entry for additional details	biotin	See mage-tab files linked to series entry for additional details	9606	See mage-tab files linked to series entry for additional details	See mage-tab files linked to series entry for additional details	See mage-tab files linked to series entry for additional details	GPL96	Mervi,,Heiskanen	mervi.heiskanen@nih.gov	2402765175	CBIIT	NCI	9609 Medical Center Drive, 1W378	Rockville	MD	20850	USA	ftp://ftp.ncbi.nlm.nih.gov/geo/samples/GSM1672nnn/GSM1672496/suppl/GSM1672496_NCI_U133A_76L.CEL.gz	ftp://ftp.ncbi.nlm.nih.gov/geo/samples/GSM1672nnn/GSM1672496/suppl/GSM1672496_NCI_U133A_76L.mas5.CHP.gz	22283
GSM1672497	Public on May 02 2015	May 01 2015	May 02 2015	RNA	1	MSKCC	Homo sapiens	disease_state: Lung Adenocarcinoma	Sex: Female	age: 63	race: White	vital_status: Dead	clinical_treatment_adjuvant_chemo: No	clinical_treatment_adjuvant_rt: No	disease_stage: pN2pT1	first_progression_or_relapse: No	months_to_first_progression: --	mths_to_last_clinical_assessment: 29	months_to_last_contact_or_death: 33	smoking_history: Smoked in the past	surgical_margins: ALL MARGINS PATHOLOGICALLY NEGATIVE	organism_part: Lung	histologic_grade: Moderate Differentiation	total RNA	See mage-tab files linked to series entry for additional details	biotin	See mage-tab files linked to series entry for additional details	9606	See mage-tab files linked to series entry for additional details	See mage-tab files linked to series entry for additional details	See mage-tab files linked to series entry for additional details	GPL96	Mervi,,Heiskanen	mervi.heiskanen@nih.gov	2402765175	CBIIT	NCI	9609 Medical Center Drive, 1W378	Rockville	MD	20850	USA	ftp://ftp.ncbi.nlm.nih.gov/geo/samples/GSM1672nnn/GSM1672497/suppl/GSM1672497_NCI_U133A_77L.CEL.gz	ftp://ftp.ncbi.nlm.nih.gov/geo/samples/GSM1672nnn/GSM1672497/suppl/GSM1672497_NCI_U133A_77L.mas5.CHP.gz	22283
GSM1672498	Public on May 02 2015	May 01 2015	May 02 2015	RNA	1	MSKCC	Homo sapiens	disease_state: Lung Adenocarcinoma	Sex: Female	age: 76	race: White	vital_status: Alive	clinical_treatment_adjuvant_chemo: No	clinical_treatment_adjuvant_rt: No	disease_stage: pN0pT2	first_progression_or_relapse: No	months_to_first_progression: --	mths_to_last_clinical_assessment: 37	months_to_last_contact_or_death: 37	smoking_history: Smoked in the past	surgical_margins: ALL MARGINS PATHOLOGICALLY NEGATIVE	organism_part: Lung	histologic_grade: POORLY DIFFERENTIATED	total RNA	See mage-tab files linked to series entry for additional details	biotin	See mage-tab files linked to series entry for additional details	9606	See mage-tab files linked to series entry for additional details	See mage-tab files linked to series entry for additional details	See mage-tab files linked to series entry for additional details	GPL96	Mervi,,Heiskanen	mervi.heiskanen@nih.gov	2402765175	CBIIT	NCI	9609 Medical Center Drive, 1W378	Rockville	MD	20850	USA	ftp://ftp.ncbi.nlm.nih.gov/geo/samples/GSM1672nnn/GSM1672498/suppl/GSM1672498_NCI_U133A_78L.CEL.gz	ftp://ftp.ncbi.nlm.nih.gov/geo/samples/GSM1672nnn/GSM1672498/suppl/GSM1672498_NCI_U133A_78L.mas5.CHP.gz	22283
GSM1672499	Public on May 02 2015	May 01 2015	May 02 2015	RNA	1	MSKCC	Homo sapiens	disease_state: Lung Adenocarcinoma	Sex: Male	age: 72	race: White	vital_status: Dead	clinical_treatment_adjuvant_chemo: Yes	clinical_treatment_adjuvant_rt: No	disease_stage: pN1pT2	first_progression_or_relapse: Yes	months_to_first_progression: 15	mths_to_last_clinical_assessment: 16	months_to_last_contact_or_death: 17	smoking_history: Smoked in the past	surgical_margins: ALL MARGINS PATHOLOGICALLY NEGATIVE	organism_part: Lung	histologic_grade: WELL DIFFERENTIATED	total RNA	See mage-tab files linked to series entry for additional details	biotin	See mage-tab files linked to series entry for additional details	9606	See mage-tab files linked to series entry for additional details	See mage-tab files linked to series entry for additional details	See mage-tab files linked to series entry for additional details	GPL96	Mervi,,Heiskanen	mervi.heiskanen@nih.gov	2402765175	CBIIT	NCI	9609 Medical Center Drive, 1W378	Rockville	MD	20850	USA	ftp://ftp.ncbi.nlm.nih.gov/geo/samples/GSM1672nnn/GSM1672499/suppl/GSM1672499_NCI_U133A_79L.CEL.gz	ftp://ftp.ncbi.nlm.nih.gov/geo/samples/GSM1672nnn/GSM1672499/suppl/GSM1672499_NCI_U133A_79L.mas5.CHP.gz	22283
GSM1672500	Public on May 02 2015	May 01 2015	May 02 2015	RNA	1	MSKCC	Homo sapiens	disease_state: Lung Adenocarcinoma	Sex: Female	age: 51	race: White	vital_status: Dead	clinical_treatment_adjuvant_chemo: No	clinical_treatment_adjuvant_rt: No	disease_stage: pN0pT1	first_progression_or_relapse: No	months_to_first_progression: --	mths_to_last_clinical_assessment: 24	months_to_last_contact_or_death: 24	smoking_history: Smoked in the past	surgical_margins: ALL MARGINS PATHOLOGICALLY NEGATIVE	organism_part: Lung	histologic_grade: POORLY DIFFERENTIATED	total RNA	See mage-tab files linked to series entry for additional details	biotin	See mage-tab files linked to series entry for additional details	9606	See mage-tab files linked to series entry for additional details	See mage-tab files linked to series entry for additional details	See mage-tab files linked to series entry for additional details	GPL96	Mervi,,Heiskanen	mervi.heiskanen@nih.gov	2402765175	CBIIT	NCI	9609 Medical Center Drive, 1W378	Rockville	MD	20850	USA	ftp://ftp.ncbi.nlm.nih.gov/geo/samples/GSM1672nnn/GSM1672500/suppl/GSM1672500_NCI_U133A_80L.CEL.gz	ftp://ftp.ncbi.nlm.nih.gov/geo/samples/GSM1672nnn/GSM1672500/suppl/GSM1672500_NCI_U133A_80L.mas5.CHP.gz	22283
GSM1672501	Public on May 02 2015	May 01 2015	May 02 2015	RNA	1	MSKCC	Homo sapiens	disease_state: Lung Adenocarcinoma	Sex: Female	age: 63	race: White	vital_status: Alive	clinical_treatment_adjuvant_chemo: No	clinical_treatment_adjuvant_rt: No	disease_stage: pN0pT1	first_progression_or_relapse: No	months_to_first_progression: --	mths_to_last_clinical_assessment: 44	months_to_last_contact_or_death: 44	smoking_history: Never smoked	surgical_margins: ALL MARGINS PATHOLOGICALLY NEGATIVE	organism_part: Lung	histologic_grade: Moderate Differentiation	total RNA	See mage-tab files linked to series entry for additional details	biotin	See mage-tab files linked to series entry for additional details	9606	See mage-tab files linked to series entry for additional details	See mage-tab files linked to series entry for additional details	See mage-tab files linked to series entry for additional details	GPL96	Mervi,,Heiskanen	mervi.heiskanen@nih.gov	2402765175	CBIIT	NCI	9609 Medical Center Drive, 1W378	Rockville	MD	20850	USA	ftp://ftp.ncbi.nlm.nih.gov/geo/samples/GSM1672nnn/GSM1672501/suppl/GSM1672501_NCI_U133A_81L.CEL.gz	ftp://ftp.ncbi.nlm.nih.gov/geo/samples/GSM1672nnn/GSM1672501/suppl/GSM1672501_NCI_U133A_81L.mas5.CHP.gz	22283
GSM1672502	Public on May 02 2015	May 01 2015	May 02 2015	RNA	1	MSKCC	Homo sapiens	disease_state: Lung Adenocarcinoma	Sex: Female	age: 80	race: White	vital_status: Alive	clinical_treatment_adjuvant_chemo: No	clinical_treatment_adjuvant_rt: No	disease_stage: pN0pT1	first_progression_or_relapse: No	months_to_first_progression: --	mths_to_last_clinical_assessment: 30	months_to_last_contact_or_death: 30	smoking_history: Smoked in the past	surgical_margins: ALL MARGINS PATHOLOGICALLY NEGATIVE	organism_part: Lung	histologic_grade: Moderate Differentiation	total RNA	See mage-tab files linked to series entry for additional details	biotin	See mage-tab files linked to series entry for additional details	9606	See mage-tab files linked to series entry for additional details	See mage-tab files linked to series entry for additional details	See mage-tab files linked to series entry for additional details	GPL96	Mervi,,Heiskanen	mervi.heiskanen@nih.gov	2402765175	CBIIT	NCI	9609 Medical Center Drive, 1W378	Rockville	MD	20850	USA	ftp://ftp.ncbi.nlm.nih.gov/geo/samples/GSM1672nnn/GSM1672502/suppl/GSM1672502_NCI_U133A_82L.CEL.gz	ftp://ftp.ncbi.nlm.nih.gov/geo/samples/GSM1672nnn/GSM1672502/suppl/GSM1672502_NCI_U133A_82L.mas5.CHP.gz	22283
GSM1672503	Public on May 02 2015	May 01 2015	May 02 2015	RNA	1	MSKCC	Homo sapiens	disease_state: Lung Adenocarcinoma	Sex: Female	age: 74	race: White	vital_status: Alive	clinical_treatment_adjuvant_chemo: Yes	clinical_treatment_adjuvant_rt: Yes	disease_stage: pN1pT2	first_progression_or_relapse: Yes	months_to_first_progression: 26	mths_to_last_clinical_assessment: 50	months_to_last_contact_or_death: 50	smoking_history: Never smoked	surgical_margins: ALL MARGINS PATHOLOGICALLY NEGATIVE	organism_part: Lung	histologic_grade: Moderate Differentiation	total RNA	See mage-tab files linked to series entry for additional details	biotin	See mage-tab files linked to series entry for additional details	9606	See mage-tab files linked to series entry for additional details	See mage-tab files linked to series entry for additional details	See mage-tab files linked to series entry for additional details	GPL96	Mervi,,Heiskanen	mervi.heiskanen@nih.gov	2402765175	CBIIT	NCI	9609 Medical Center Drive, 1W378	Rockville	MD	20850	USA	ftp://ftp.ncbi.nlm.nih.gov/geo/samples/GSM1672nnn/GSM1672503/suppl/GSM1672503_NCI_U133A_83L.CEL.gz	ftp://ftp.ncbi.nlm.nih.gov/geo/samples/GSM1672nnn/GSM1672503/suppl/GSM1672503_NCI_U133A_83L.mas5.CHP.gz	22283
GSM1672504	Public on May 02 2015	May 01 2015	May 02 2015	RNA	1	MSKCC	Homo sapiens	disease_state: Lung Adenocarcinoma	Sex: Female	age: 58	race: White	vital_status: Alive	clinical_treatment_adjuvant_chemo: No	clinical_treatment_adjuvant_rt: Yes	disease_stage: pN0pT1	first_progression_or_relapse: No	months_to_first_progression: --	mths_to_last_clinical_assessment: 88	months_to_last_contact_or_death: 88	smoking_history: Smoked in the past	surgical_margins: ALL MARGINS PATHOLOGICALLY NEGATIVE	organism_part: Lung	histologic_grade: POORLY DIFFERENTIATED	total RNA	See mage-tab files linked to series entry for additional details	biotin	See mage-tab files linked to series entry for additional details	9606	See mage-tab files linked to series entry for additional details	See mage-tab files linked to series entry for additional details	See mage-tab files linked to series entry for additional details	GPL96	Mervi,,Heiskanen	mervi.heiskanen@nih.gov	2402765175	CBIIT	NCI	9609 Medical Center Drive, 1W378	Rockville	MD	20850	USA	ftp://ftp.ncbi.nlm.nih.gov/geo/samples/GSM1672nnn/GSM1672504/suppl/GSM1672504_NCI_U133A_84L.CEL.gz	ftp://ftp.ncbi.nlm.nih.gov/geo/samples/GSM1672nnn/GSM1672504/suppl/GSM1672504_NCI_U133A_84L.mas5.CHP.gz	22283
GSM1672505	Public on May 02 2015	May 01 2015	May 02 2015	RNA	1	MSKCC	Homo sapiens	disease_state: Lung Adenocarcinoma	Sex: Female	age: 62	race: White	vital_status: Alive	clinical_treatment_adjuvant_chemo: No	clinical_treatment_adjuvant_rt: Yes	disease_stage: pN0pT2	first_progression_or_relapse: Yes	months_to_first_progression: 16	mths_to_last_clinical_assessment: 42	months_to_last_contact_or_death: 42	smoking_history: Smoked in the past	surgical_margins: ALL MARGINS PATHOLOGICALLY NEGATIVE	organism_part: Lung	histologic_grade: POORLY DIFFERENTIATED	total RNA	See mage-tab files linked to series entry for additional details	biotin	See mage-tab files linked to series entry for additional details	9606	See mage-tab files linked to series entry for additional details	See mage-tab files linked to series entry for additional details	See mage-tab files linked to series entry for additional details	GPL96	Mervi,,Heiskanen	mervi.heiskanen@nih.gov	2402765175	CBIIT	NCI	9609 Medical Center Drive, 1W378	Rockville	MD	20850	USA	ftp://ftp.ncbi.nlm.nih.gov/geo/samples/GSM1672nnn/GSM1672505/suppl/GSM1672505_NCI_U133A_85L.CEL.gz	ftp://ftp.ncbi.nlm.nih.gov/geo/samples/GSM1672nnn/GSM1672505/suppl/GSM1672505_NCI_U133A_85L.mas5.CHP.gz	22283
GSM1672506	Public on May 02 2015	May 01 2015	May 02 2015	RNA	1	MSKCC	Homo sapiens	disease_state: Lung Adenocarcinoma	Sex: Female	age: 67	race: White	vital_status: Alive	clinical_treatment_adjuvant_chemo: No	clinical_treatment_adjuvant_rt: No	disease_stage: pN0pT1	first_progression_or_relapse: No	months_to_first_progression: --	mths_to_last_clinical_assessment: 46	months_to_last_contact_or_death: 46	smoking_history: Unknown	surgical_margins: ALL MARGINS PATHOLOGICALLY NEGATIVE	organism_part: Lung	histologic_grade: Moderate Differentiation	total RNA	See mage-tab files linked to series entry for additional details	biotin	See mage-tab files linked to series entry for additional details	9606	See mage-tab files linked to series entry for additional details	See mage-tab files linked to series entry for additional details	See mage-tab files linked to series entry for additional details	GPL96	Mervi,,Heiskanen	mervi.heiskanen@nih.gov	2402765175	CBIIT	NCI	9609 Medical Center Drive, 1W378	Rockville	MD	20850	USA	ftp://ftp.ncbi.nlm.nih.gov/geo/samples/GSM1672nnn/GSM1672506/suppl/GSM1672506_NCI_U133A_86L.CEL.gz	ftp://ftp.ncbi.nlm.nih.gov/geo/samples/GSM1672nnn/GSM1672506/suppl/GSM1672506_NCI_U133A_86L.mas5.CHP.gz	22283
GSM1672507	Public on May 02 2015	May 01 2015	May 02 2015	RNA	1	MSKCC	Homo sapiens	disease_state: Lung Adenocarcinoma	Sex: Female	age: 71	race: White	vital_status: Alive	clinical_treatment_adjuvant_chemo: No	clinical_treatment_adjuvant_rt: No	disease_stage: pN0pT1	first_progression_or_relapse: No	months_to_first_progression: --	mths_to_last_clinical_assessment: 56	months_to_last_contact_or_death: 56	smoking_history: Smoked in the past	surgical_margins: ALL MARGINS PATHOLOGICALLY NEGATIVE	organism_part: Lung	histologic_grade: WELL DIFFERENTIATED	total RNA	See mage-tab files linked to series entry for additional details	biotin	See mage-tab files linked to series entry for additional details	9606	See mage-tab files linked to series entry for additional details	See mage-tab files linked to series entry for additional details	See mage-tab files linked to series entry for additional details	GPL96	Mervi,,Heiskanen	mervi.heiskanen@nih.gov	2402765175	CBIIT	NCI	9609 Medical Center Drive, 1W378	Rockville	MD	20850	USA	ftp://ftp.ncbi.nlm.nih.gov/geo/samples/GSM1672nnn/GSM1672507/suppl/GSM1672507_NCI_U133A_87L.CEL.gz	ftp://ftp.ncbi.nlm.nih.gov/geo/samples/GSM1672nnn/GSM1672507/suppl/GSM1672507_NCI_U133A_87L.mas5.CHP.gz	22283
GSM1672508	Public on May 02 2015	May 01 2015	May 02 2015	RNA	1	MSKCC	Homo sapiens	disease_state: Lung Adenocarcinoma	Sex: Female	age: 61	race: White	vital_status: Alive	clinical_treatment_adjuvant_chemo: No	clinical_treatment_adjuvant_rt: No	disease_stage: pN0pT1	first_progression_or_relapse: No	months_to_first_progression: --	mths_to_last_clinical_assessment: 40	months_to_last_contact_or_death: 40	smoking_history: Smoked in the past	surgical_margins: ALL MARGINS PATHOLOGICALLY NEGATIVE	organism_part: Lung	histologic_grade: WELL DIFFERENTIATED	total RNA	See mage-tab files linked to series entry for additional details	biotin	See mage-tab files linked to series entry for additional details	9606	See mage-tab files linked to series entry for additional details	See mage-tab files linked to series entry for additional details	See mage-tab files linked to series entry for additional details	GPL96	Mervi,,Heiskanen	mervi.heiskanen@nih.gov	2402765175	CBIIT	NCI	9609 Medical Center Drive, 1W378	Rockville	MD	20850	USA	ftp://ftp.ncbi.nlm.nih.gov/geo/samples/GSM1672nnn/GSM1672508/suppl/GSM1672508_NCI_U133A_88L.CEL.gz	ftp://ftp.ncbi.nlm.nih.gov/geo/samples/GSM1672nnn/GSM1672508/suppl/GSM1672508_NCI_U133A_88L.mas5.CHP.gz	22283
GSM1672509	Public on May 02 2015	May 01 2015	May 02 2015	RNA	1	MSKCC	Homo sapiens	disease_state: Lung Adenocarcinoma	Sex: Female	age: 38	race: White	vital_status: Alive	clinical_treatment_adjuvant_chemo: No	clinical_treatment_adjuvant_rt: No	disease_stage: pN2pT2	first_progression_or_relapse: No	months_to_first_progression: --	mths_to_last_clinical_assessment: 38	months_to_last_contact_or_death: 38	smoking_history: Never smoked	surgical_margins: ALL MARGINS PATHOLOGICALLY NEGATIVE	organism_part: Lung	histologic_grade: POORLY DIFFERENTIATED	total RNA	See mage-tab files linked to series entry for additional details	biotin	See mage-tab files linked to series entry for additional details	9606	See mage-tab files linked to series entry for additional details	See mage-tab files linked to series entry for additional details	See mage-tab files linked to series entry for additional details	GPL96	Mervi,,Heiskanen	mervi.heiskanen@nih.gov	2402765175	CBIIT	NCI	9609 Medical Center Drive, 1W378	Rockville	MD	20850	USA	ftp://ftp.ncbi.nlm.nih.gov/geo/samples/GSM1672nnn/GSM1672509/suppl/GSM1672509_NCI_U133A_89L.CEL.gz	ftp://ftp.ncbi.nlm.nih.gov/geo/samples/GSM1672nnn/GSM1672509/suppl/GSM1672509_NCI_U133A_89L.mas5.CHP.gz	22283
GSM1672510	Public on May 02 2015	May 01 2015	May 02 2015	RNA	1	MSKCC	Homo sapiens	disease_state: Lung Adenocarcinoma	Sex: Female	age: 72	race: White	vital_status: Alive	clinical_treatment_adjuvant_chemo: No	clinical_treatment_adjuvant_rt: No	disease_stage: pN1pT2	first_progression_or_relapse: No	months_to_first_progression: --	mths_to_last_clinical_assessment: 43	months_to_last_contact_or_death: 43	smoking_history: Smoked in the past	surgical_margins: ALL MARGINS PATHOLOGICALLY NEGATIVE	organism_part: Lung	histologic_grade: POORLY DIFFERENTIATED	total RNA	See mage-tab files linked to series entry for additional details	biotin	See mage-tab files linked to series entry for additional details	9606	See mage-tab files linked to series entry for additional details	See mage-tab files linked to series entry for additional details	See mage-tab files linked to series entry for additional details	GPL96	Mervi,,Heiskanen	mervi.heiskanen@nih.gov	2402765175	CBIIT	NCI	9609 Medical Center Drive, 1W378	Rockville	MD	20850	USA	ftp://ftp.ncbi.nlm.nih.gov/geo/samples/GSM1672nnn/GSM1672510/suppl/GSM1672510_NCI_U133A_90L.CEL.gz	ftp://ftp.ncbi.nlm.nih.gov/geo/samples/GSM1672nnn/GSM1672510/suppl/GSM1672510_NCI_U133A_90L.mas5.CHP.gz	22283
GSM1672511	Public on May 02 2015	May 01 2015	May 02 2015	RNA	1	MSKCC	Homo sapiens	disease_state: Lung Adenocarcinoma	Sex: Female	age: 43	race: White	vital_status: Alive	clinical_treatment_adjuvant_chemo: No	clinical_treatment_adjuvant_rt: No	disease_stage: pN0pT1	first_progression_or_relapse: No	months_to_first_progression: --	mths_to_last_clinical_assessment: 55	months_to_last_contact_or_death: 55	smoking_history: Smoked in the past	surgical_margins: ALL MARGINS PATHOLOGICALLY NEGATIVE	organism_part: Lung	histologic_grade: WELL DIFFERENTIATED	total RNA	See mage-tab files linked to series entry for additional details	biotin	See mage-tab files linked to series entry for additional details	9606	See mage-tab files linked to series entry for additional details	See mage-tab files linked to series entry for additional details	See mage-tab files linked to series entry for additional details	GPL96	Mervi,,Heiskanen	mervi.heiskanen@nih.gov	2402765175	CBIIT	NCI	9609 Medical Center Drive, 1W378	Rockville	MD	20850	USA	ftp://ftp.ncbi.nlm.nih.gov/geo/samples/GSM1672nnn/GSM1672511/suppl/GSM1672511_NCI_U133A_91L.CEL.gz	ftp://ftp.ncbi.nlm.nih.gov/geo/samples/GSM1672nnn/GSM1672511/suppl/GSM1672511_NCI_U133A_91L.mas5.CHP.gz	22283
GSM1672512	Public on May 02 2015	May 01 2015	May 02 2015	RNA	1	MSKCC	Homo sapiens	disease_state: Lung Adenocarcinoma	Sex: Female	age: 65	race: White	vital_status: Dead	clinical_treatment_adjuvant_chemo: Yes	clinical_treatment_adjuvant_rt: Yes	disease_stage: pN2pT2	first_progression_or_relapse: Yes	months_to_first_progression: 7	mths_to_last_clinical_assessment: 11	months_to_last_contact_or_death: 17	smoking_history: Never smoked	surgical_margins: ALL MARGINS PATHOLOGICALLY NEGATIVE	organism_part: Lung	histologic_grade: POORLY DIFFERENTIATED	total RNA	See mage-tab files linked to series entry for additional details	biotin	See mage-tab files linked to series entry for additional details	9606	See mage-tab files linked to series entry for additional details	See mage-tab files linked to series entry for additional details	See mage-tab files linked to series entry for additional details	GPL96	Mervi,,Heiskanen	mervi.heiskanen@nih.gov	2402765175	CBIIT	NCI	9609 Medical Center Drive, 1W378	Rockville	MD	20850	USA	ftp://ftp.ncbi.nlm.nih.gov/geo/samples/GSM1672nnn/GSM1672512/suppl/GSM1672512_NCI_U133A_92L.CEL.gz	ftp://ftp.ncbi.nlm.nih.gov/geo/samples/GSM1672nnn/GSM1672512/suppl/GSM1672512_NCI_U133A_92L.mas5.CHP.gz	22283
GSM1672513	Public on May 02 2015	May 01 2015	May 02 2015	RNA	1	MSKCC	Homo sapiens	disease_state: Lung Adenocarcinoma	Sex: Female	age: 54	race: White	vital_status: Alive	clinical_treatment_adjuvant_chemo: No	clinical_treatment_adjuvant_rt: No	disease_stage: pN0pT2	first_progression_or_relapse: No	months_to_first_progression: --	mths_to_last_clinical_assessment: 36	months_to_last_contact_or_death: 36	smoking_history: Never smoked	surgical_margins: ALL MARGINS PATHOLOGICALLY NEGATIVE	organism_part: Lung	histologic_grade: Moderate Differentiation	total RNA	See mage-tab files linked to series entry for additional details	biotin	See mage-tab files linked to series entry for additional details	9606	See mage-tab files linked to series entry for additional details	See mage-tab files linked to series entry for additional details	See mage-tab files linked to series entry for additional details	GPL96	Mervi,,Heiskanen	mervi.heiskanen@nih.gov	2402765175	CBIIT	NCI	9609 Medical Center Drive, 1W378	Rockville	MD	20850	USA	ftp://ftp.ncbi.nlm.nih.gov/geo/samples/GSM1672nnn/GSM1672513/suppl/GSM1672513_NCI_U133A_93L.CEL.gz	ftp://ftp.ncbi.nlm.nih.gov/geo/samples/GSM1672nnn/GSM1672513/suppl/GSM1672513_NCI_U133A_93L.mas5.CHP.gz	22283
GSM1672514	Public on May 02 2015	May 01 2015	May 02 2015	RNA	1	MSKCC	Homo sapiens	disease_state: Lung Adenocarcinoma	Sex: Female	age: 79	race: White	vital_status: Dead	clinical_treatment_adjuvant_chemo: No	clinical_treatment_adjuvant_rt: Yes	disease_stage: pN1pT1	first_progression_or_relapse: Yes	months_to_first_progression: 6	mths_to_last_clinical_assessment: 10	months_to_last_contact_or_death: 10	smoking_history: Never smoked	surgical_margins: ALL MARGINS PATHOLOGICALLY NEGATIVE	organism_part: Lung	histologic_grade: POORLY DIFFERENTIATED	total RNA	See mage-tab files linked to series entry for additional details	biotin	See mage-tab files linked to series entry for additional details	9606	See mage-tab files linked to series entry for additional details	See mage-tab files linked to series entry for additional details	See mage-tab files linked to series entry for additional details	GPL96	Mervi,,Heiskanen	mervi.heiskanen@nih.gov	2402765175	CBIIT	NCI	9609 Medical Center Drive, 1W378	Rockville	MD	20850	USA	ftp://ftp.ncbi.nlm.nih.gov/geo/samples/GSM1672nnn/GSM1672514/suppl/GSM1672514_NCI_U133A_94L_Rep.CEL.gz	ftp://ftp.ncbi.nlm.nih.gov/geo/samples/GSM1672nnn/GSM1672514/suppl/GSM1672514_NCI_U133A_94L_Rep.mas5.CHP.gz	22283
GSM1672515	Public on May 02 2015	May 01 2015	May 02 2015	RNA	1	MSKCC	Homo sapiens	disease_state: Lung Adenocarcinoma	Sex: Male	age: 61	race: White	vital_status: Dead	clinical_treatment_adjuvant_chemo: Yes	clinical_treatment_adjuvant_rt: No	disease_stage: pN0pT2	first_progression_or_relapse: Yes	months_to_first_progression: 21	mths_to_last_clinical_assessment: 23	months_to_last_contact_or_death: 23	smoking_history: Never smoked	surgical_margins: ALL MARGINS PATHOLOGICALLY NEGATIVE	organism_part: Lung	histologic_grade: POORLY DIFFERENTIATED	total RNA	See mage-tab files linked to series entry for additional details	biotin	See mage-tab files linked to series entry for additional details	9606	See mage-tab files linked to series entry for additional details	See mage-tab files linked to series entry for additional details	See mage-tab files linked to series entry for additional details	GPL96	Mervi,,Heiskanen	mervi.heiskanen@nih.gov	2402765175	CBIIT	NCI	9609 Medical Center Drive, 1W378	Rockville	MD	20850	USA	ftp://ftp.ncbi.nlm.nih.gov/geo/samples/GSM1672nnn/GSM1672515/suppl/GSM1672515_NCI_U133A_95L.CEL.gz	ftp://ftp.ncbi.nlm.nih.gov/geo/samples/GSM1672nnn/GSM1672515/suppl/GSM1672515_NCI_U133A_95L.mas5.CHP.gz	22283
GSM1672516	Public on May 02 2015	May 01 2015	May 02 2015	RNA	1	MSKCC	Homo sapiens	disease_state: Lung Adenocarcinoma	Sex: Male	age: 74	race: White	vital_status: Alive	clinical_treatment_adjuvant_chemo: No	clinical_treatment_adjuvant_rt: No	disease_stage: pN0pT2	first_progression_or_relapse: No	months_to_first_progression: --	mths_to_last_clinical_assessment: 62	months_to_last_contact_or_death: 62	smoking_history: Smoked in the past	surgical_margins: ALL MARGINS PATHOLOGICALLY NEGATIVE	organism_part: Lung	histologic_grade: Moderate Differentiation	total RNA	See mage-tab files linked to series entry for additional details	biotin	See mage-tab files linked to series entry for additional details	9606	See mage-tab files linked to series entry for additional details	See mage-tab files linked to series entry for additional details	See mage-tab files linked to series entry for additional details	GPL96	Mervi,,Heiskanen	mervi.heiskanen@nih.gov	2402765175	CBIIT	NCI	9609 Medical Center Drive, 1W378	Rockville	MD	20850	USA	ftp://ftp.ncbi.nlm.nih.gov/geo/samples/GSM1672nnn/GSM1672516/suppl/GSM1672516_NCI_U133A_96L.CEL.gz	ftp://ftp.ncbi.nlm.nih.gov/geo/samples/GSM1672nnn/GSM1672516/suppl/GSM1672516_NCI_U133A_96L.mas5.CHP.gz	22283
GSM1672517	Public on May 02 2015	May 01 2015	May 02 2015	RNA	1	MSKCC	Homo sapiens	disease_state: Lung Adenocarcinoma	Sex: Female	age: 80	race: White	vital_status: Alive	clinical_treatment_adjuvant_chemo: Yes	clinical_treatment_adjuvant_rt: No	disease_stage: pN0pT3	first_progression_or_relapse: Yes	months_to_first_progression: 36	mths_to_last_clinical_assessment: 85	months_to_last_contact_or_death: 85	smoking_history: Smoked in the past	surgical_margins: ALL MARGINS PATHOLOGICALLY NEGATIVE	organism_part: Lung	histologic_grade: Moderate Differentiation	total RNA	See mage-tab files linked to series entry for additional details	biotin	See mage-tab files linked to series entry for additional details	9606	See mage-tab files linked to series entry for additional details	See mage-tab files linked to series entry for additional details	See mage-tab files linked to series entry for additional details	GPL96	Mervi,,Heiskanen	mervi.heiskanen@nih.gov	2402765175	CBIIT	NCI	9609 Medical Center Drive, 1W378	Rockville	MD	20850	USA	ftp://ftp.ncbi.nlm.nih.gov/geo/samples/GSM1672nnn/GSM1672517/suppl/GSM1672517_NCI_U133A_98L.CEL.gz	ftp://ftp.ncbi.nlm.nih.gov/geo/samples/GSM1672nnn/GSM1672517/suppl/GSM1672517_NCI_U133A_98L.mas5.CHP.gz	22283
GSM1672518	Public on May 02 2015	May 01 2015	May 02 2015	RNA	1	MSKCC	Homo sapiens	disease_state: Lung Adenocarcinoma	Sex: Female	age: 68	race: White	vital_status: Dead	clinical_treatment_adjuvant_chemo: Yes	clinical_treatment_adjuvant_rt: Yes	disease_stage: pN0pT2	first_progression_or_relapse: Yes	months_to_first_progression: 11	mths_to_last_clinical_assessment: 47	months_to_last_contact_or_death: 47	smoking_history: Smoked in the past	surgical_margins: ALL MARGINS PATHOLOGICALLY NEGATIVE	organism_part: Lung	histologic_grade: POORLY DIFFERENTIATED	total RNA	See mage-tab files linked to series entry for additional details	biotin	See mage-tab files linked to series entry for additional details	9606	See mage-tab files linked to series entry for additional details	See mage-tab files linked to series entry for additional details	See mage-tab files linked to series entry for additional details	GPL96	Mervi,,Heiskanen	mervi.heiskanen@nih.gov	2402765175	CBIIT	NCI	9609 Medical Center Drive, 1W378	Rockville	MD	20850	USA	ftp://ftp.ncbi.nlm.nih.gov/geo/samples/GSM1672nnn/GSM1672518/suppl/GSM1672518_NCI_U133A_99L.CEL.gz	ftp://ftp.ncbi.nlm.nih.gov/geo/samples/GSM1672nnn/GSM1672518/suppl/GSM1672518_NCI_U133A_99L.mas5.CHP.gz	22283
GSM1672519	Public on May 02 2015	May 01 2015	May 02 2015	RNA	1	MSKCC	Homo sapiens	disease_state: Lung Adenocarcinoma	Sex: Female	age: 64	race: White	vital_status: Dead	clinical_treatment_adjuvant_chemo: No	clinical_treatment_adjuvant_rt: No	disease_stage: pN0pT1	first_progression_or_relapse: Yes	months_to_first_progression: 11	mths_to_last_clinical_assessment: 48	months_to_last_contact_or_death: 48	smoking_history: Smoked in the past	surgical_margins: ALL MARGINS PATHOLOGICALLY NEGATIVE	organism_part: Lung	histologic_grade: WELL DIFFERENTIATED	total RNA	See mage-tab files linked to series entry for additional details	biotin	See mage-tab files linked to series entry for additional details	9606	See mage-tab files linked to series entry for additional details	See mage-tab files linked to series entry for additional details	See mage-tab files linked to series entry for additional details	GPL96	Mervi,,Heiskanen	mervi.heiskanen@nih.gov	2402765175	CBIIT	NCI	9609 Medical Center Drive, 1W378	Rockville	MD	20850	USA	ftp://ftp.ncbi.nlm.nih.gov/geo/samples/GSM1672nnn/GSM1672519/suppl/GSM1672519_NCI_U133A_100L.CEL.gz	ftp://ftp.ncbi.nlm.nih.gov/geo/samples/GSM1672nnn/GSM1672519/suppl/GSM1672519_NCI_U133A_100L.mas5.CHP.gz	22283
GSM1672520	Public on May 02 2015	May 01 2015	May 02 2015	RNA	1	MSKCC	Homo sapiens	disease_state: Lung Adenocarcinoma	Sex: Female	age: 58	race: White	vital_status: Alive	clinical_treatment_adjuvant_chemo: Yes	clinical_treatment_adjuvant_rt: No	disease_stage: pN1pT2	first_progression_or_relapse: Yes	months_to_first_progression: 31	mths_to_last_clinical_assessment: 57	months_to_last_contact_or_death: 57	smoking_history: Smoked in the past	surgical_margins: ALL MARGINS PATHOLOGICALLY NEGATIVE	organism_part: Lung	histologic_grade: Moderate Differentiation	total RNA	See mage-tab files linked to series entry for additional details	biotin	See mage-tab files linked to series entry for additional details	9606	See mage-tab files linked to series entry for additional details	See mage-tab files linked to series entry for additional details	See mage-tab files linked to series entry for additional details	GPL96	Mervi,,Heiskanen	mervi.heiskanen@nih.gov	2402765175	CBIIT	NCI	9609 Medical Center Drive, 1W378	Rockville	MD	20850	USA	ftp://ftp.ncbi.nlm.nih.gov/geo/samples/GSM1672nnn/GSM1672520/suppl/GSM1672520_NCI_U133A_101L.CEL.gz	ftp://ftp.ncbi.nlm.nih.gov/geo/samples/GSM1672nnn/GSM1672520/suppl/GSM1672520_NCI_U133A_101L.mas5.CHP.gz	22283
GSM1672521	Public on May 02 2015	May 01 2015	May 02 2015	RNA	1	MSKCC	Homo sapiens	disease_state: Lung Adenocarcinoma	Sex: Male	age: 57	race: Unknown	vital_status: Alive	clinical_treatment_adjuvant_chemo: No	clinical_treatment_adjuvant_rt: No	disease_stage: pN0pT2	first_progression_or_relapse: No	months_to_first_progression: --	mths_to_last_clinical_assessment: 43	months_to_last_contact_or_death: 43	smoking_history: Smoked in the past	surgical_margins: ALL MARGINS PATHOLOGICALLY NEGATIVE	organism_part: Lung	histologic_grade: Moderate Differentiation	total RNA	See mage-tab files linked to series entry for additional details	biotin	See mage-tab files linked to series entry for additional details	9606	See mage-tab files linked to series entry for additional details	See mage-tab files linked to series entry for additional details	See mage-tab files linked to series entry for additional details	GPL96	Mervi,,Heiskanen	mervi.heiskanen@nih.gov	2402765175	CBIIT	NCI	9609 Medical Center Drive, 1W378	Rockville	MD	20850	USA	ftp://ftp.ncbi.nlm.nih.gov/geo/samples/GSM1672nnn/GSM1672521/suppl/GSM1672521_NCI_U133A_102L.CEL.gz	ftp://ftp.ncbi.nlm.nih.gov/geo/samples/GSM1672nnn/GSM1672521/suppl/GSM1672521_NCI_U133A_102L.mas5.CHP.gz	22283
GSM1672522	Public on May 02 2015	May 01 2015	May 02 2015	RNA	1	MSKCC	Homo sapiens	disease_state: Lung Adenocarcinoma	Sex: Female	age: 57	race: White	vital_status: Alive	clinical_treatment_adjuvant_chemo: No	clinical_treatment_adjuvant_rt: No	disease_stage: pN0pT2	first_progression_or_relapse: No	months_to_first_progression: --	mths_to_last_clinical_assessment: 41	months_to_last_contact_or_death: 41	smoking_history: Smoked in the past	surgical_margins: ALL MARGINS PATHOLOGICALLY NEGATIVE	organism_part: Lung	histologic_grade: WELL DIFFERENTIATED	total RNA	See mage-tab files linked to series entry for additional details	biotin	See mage-tab files linked to series entry for additional details	9606	See mage-tab files linked to series entry for additional details	See mage-tab files linked to series entry for additional details	See mage-tab files linked to series entry for additional details	GPL96	Mervi,,Heiskanen	mervi.heiskanen@nih.gov	2402765175	CBIIT	NCI	9609 Medical Center Drive, 1W378	Rockville	MD	20850	USA	ftp://ftp.ncbi.nlm.nih.gov/geo/samples/GSM1672nnn/GSM1672522/suppl/GSM1672522_NCI_U133A_103L.CEL.gz	ftp://ftp.ncbi.nlm.nih.gov/geo/samples/GSM1672nnn/GSM1672522/suppl/GSM1672522_NCI_U133A_103L.mas5.CHP.gz	22283
GSM1672523	Public on May 02 2015	May 01 2015	May 02 2015	RNA	1	MSKCC	Homo sapiens	disease_state: Lung Adenocarcinoma	Sex: Male	age: 67	race: White	vital_status: Alive	clinical_treatment_adjuvant_chemo: No	clinical_treatment_adjuvant_rt: No	disease_stage: pN0pT2	first_progression_or_relapse: No	months_to_first_progression: --	mths_to_last_clinical_assessment: 43	months_to_last_contact_or_death: 43	smoking_history: Never smoked	surgical_margins: ALL MARGINS PATHOLOGICALLY NEGATIVE	organism_part: Lung	histologic_grade: POORLY DIFFERENTIATED	total RNA	See mage-tab files linked to series entry for additional details	biotin	See mage-tab files linked to series entry for additional details	9606	See mage-tab files linked to series entry for additional details	See mage-tab files linked to series entry for additional details	See mage-tab files linked to series entry for additional details	GPL96	Mervi,,Heiskanen	mervi.heiskanen@nih.gov	2402765175	CBIIT	NCI	9609 Medical Center Drive, 1W378	Rockville	MD	20850	USA	ftp://ftp.ncbi.nlm.nih.gov/geo/samples/GSM1672nnn/GSM1672523/suppl/GSM1672523_NCI_U133A_106L.CEL.gz	ftp://ftp.ncbi.nlm.nih.gov/geo/samples/GSM1672nnn/GSM1672523/suppl/GSM1672523_NCI_U133A_106L.mas5.CHP.gz	22283
GSM1672524	Public on May 02 2015	May 01 2015	May 02 2015	RNA	1	MSKCC	Homo sapiens	disease_state: Lung Adenocarcinoma	Sex: Female	age: 75	race: White	vital_status: Alive	clinical_treatment_adjuvant_chemo: No	clinical_treatment_adjuvant_rt: No	disease_stage: pN1pT2	first_progression_or_relapse: No	months_to_first_progression: --	mths_to_last_clinical_assessment: 32	months_to_last_contact_or_death: 32	smoking_history: Smoked in the past	surgical_margins: ALL MARGINS PATHOLOGICALLY NEGATIVE	organism_part: Lung	histologic_grade: POORLY DIFFERENTIATED	total RNA	See mage-tab files linked to series entry for additional details	biotin	See mage-tab files linked to series entry for additional details	9606	See mage-tab files linked to series entry for additional details	See mage-tab files linked to series entry for additional details	See mage-tab files linked to series entry for additional details	GPL96	Mervi,,Heiskanen	mervi.heiskanen@nih.gov	2402765175	CBIIT	NCI	9609 Medical Center Drive, 1W378	Rockville	MD	20850	USA	ftp://ftp.ncbi.nlm.nih.gov/geo/samples/GSM1672nnn/GSM1672524/suppl/GSM1672524_NCI_U133A_107L.CEL.gz	ftp://ftp.ncbi.nlm.nih.gov/geo/samples/GSM1672nnn/GSM1672524/suppl/GSM1672524_NCI_U133A_107L.mas5.CHP.gz	22283
GSM1672525	Public on May 02 2015	May 01 2015	May 02 2015	RNA	1	MSKCC	Homo sapiens	disease_state: Lung Adenocarcinoma	Sex: Male	age: 74	race: White	vital_status: Alive	clinical_treatment_adjuvant_chemo: No	clinical_treatment_adjuvant_rt: No	disease_stage: pN0pT1	first_progression_or_relapse: No	months_to_first_progression: --	mths_to_last_clinical_assessment: 64	months_to_last_contact_or_death: 64	smoking_history: Never smoked	surgical_margins: ALL MARGINS PATHOLOGICALLY NEGATIVE	organism_part: Lung	histologic_grade: Moderate Differentiation	total RNA	See mage-tab files linked to series entry for additional details	biotin	See mage-tab files linked to series entry for additional details	9606	See mage-tab files linked to series entry for additional details	See mage-tab files linked to series entry for additional details	See mage-tab files linked to series entry for additional details	GPL96	Mervi,,Heiskanen	mervi.heiskanen@nih.gov	2402765175	CBIIT	NCI	9609 Medical Center Drive, 1W378	Rockville	MD	20850	USA	ftp://ftp.ncbi.nlm.nih.gov/geo/samples/GSM1672nnn/GSM1672525/suppl/GSM1672525_NCI_U133A_97L.CEL.gz	ftp://ftp.ncbi.nlm.nih.gov/geo/samples/GSM1672nnn/GSM1672525/suppl/GSM1672525_NCI_U133A_97L.mas5.CHP.gz	22283
GSM1672526	Public on May 02 2015	May 01 2015	May 02 2015	RNA	1	DFCI	Homo sapiens	disease_state: Lung Adenocarcinoma	Sex: Male	age: 59	race: Unknown	vital_status: Alive	clinical_treatment_adjuvant_chemo: No	clinical_treatment_adjuvant_rt: No	disease_stage: pN0pT2	first_progression_or_relapse: No	months_to_first_progression: --	mths_to_last_clinical_assessment: 107	months_to_last_contact_or_death: 107	smoking_history: Smoked in the past	surgical_margins: ALL MARGINS PATHOLOGICALLY NEGATIVE	organism_part: Lung	histologic_grade: WELL DIFFERENTIATED	total RNA	See mage-tab files linked to series entry for additional details	biotin	See mage-tab files linked to series entry for additional details	9606	See mage-tab files linked to series entry for additional details	See mage-tab files linked to series entry for additional details	See mage-tab files linked to series entry for additional details	GPL96	Mervi,,Heiskanen	mervi.heiskanen@nih.gov	2402765175	CBIIT	NCI	9609 Medical Center Drive, 1W378	Rockville	MD	20850	USA	ftp://ftp.ncbi.nlm.nih.gov/geo/samples/GSM1672nnn/GSM1672526/suppl/GSM1672526_CL2004111013AA.CEL.gz	ftp://ftp.ncbi.nlm.nih.gov/geo/samples/GSM1672nnn/GSM1672526/suppl/GSM1672526_CL2004111013AA.mas5.CHP.gz	22283
GSM1672527	Public on May 02 2015	May 01 2015	May 02 2015	RNA	1	DFCI	Homo sapiens	disease_state: Lung Adenocarcinoma	Sex: Male	age: 75	race: Unknown	vital_status: Dead	clinical_treatment_adjuvant_chemo: No	clinical_treatment_adjuvant_rt: No	disease_stage: pN0pT2	first_progression_or_relapse: Yes	months_to_first_progression: 14	mths_to_last_clinical_assessment: 24	months_to_last_contact_or_death: 25	smoking_history: Smoked in the past	surgical_margins: ALL MARGINS PATHOLOGICALLY NEGATIVE	organism_part: Lung	histologic_grade: WELL DIFFERENTIATED	total RNA	See mage-tab files linked to series entry for additional details	biotin	See mage-tab files linked to series entry for additional details	9606	See mage-tab files linked to series entry for additional details	See mage-tab files linked to series entry for additional details	See mage-tab files linked to series entry for additional details	GPL96	Mervi,,Heiskanen	mervi.heiskanen@nih.gov	2402765175	CBIIT	NCI	9609 Medical Center Drive, 1W378	Rockville	MD	20850	USA	ftp://ftp.ncbi.nlm.nih.gov/geo/samples/GSM1672nnn/GSM1672527/suppl/GSM1672527_CL2004111022AA.CEL.gz	ftp://ftp.ncbi.nlm.nih.gov/geo/samples/GSM1672nnn/GSM1672527/suppl/GSM1672527_CL2004111022AA.mas5.CHP.gz	22283
GSM1672528	Public on May 02 2015	May 01 2015	May 02 2015	RNA	1	DFCI	Homo sapiens	disease_state: Lung Adenocarcinoma	Sex: Female	age: 60	race: Unknown	vital_status: Alive	clinical_treatment_adjuvant_chemo: No	clinical_treatment_adjuvant_rt: No	disease_stage: pN0pT2	first_progression_or_relapse: No	months_to_first_progression: --	mths_to_last_clinical_assessment: 96	months_to_last_contact_or_death: 96	smoking_history: Smoked in the past	surgical_margins: ALL MARGINS PATHOLOGICALLY NEGATIVE	organism_part: Lung	histologic_grade: POORLY DIFFERENTIATED	total RNA	See mage-tab files linked to series entry for additional details	biotin	See mage-tab files linked to series entry for additional details	9606	See mage-tab files linked to series entry for additional details	See mage-tab files linked to series entry for additional details	See mage-tab files linked to series entry for additional details	GPL96	Mervi,,Heiskanen	mervi.heiskanen@nih.gov	2402765175	CBIIT	NCI	9609 Medical Center Drive, 1W378	Rockville	MD	20850	USA	ftp://ftp.ncbi.nlm.nih.gov/geo/samples/GSM1672nnn/GSM1672528/suppl/GSM1672528_CL2004111042AA.CEL.gz	ftp://ftp.ncbi.nlm.nih.gov/geo/samples/GSM1672nnn/GSM1672528/suppl/GSM1672528_CL2004111042AA.mas5.CHP.gz	22283
GSM1672529	Public on May 02 2015	May 01 2015	May 02 2015	RNA	1	DFCI	Homo sapiens	disease_state: Lung Adenocarcinoma	Sex: Female	age: 41	race: Unknown	vital_status: Alive	clinical_treatment_adjuvant_chemo: No	clinical_treatment_adjuvant_rt: No	disease_stage: pN0pT2	first_progression_or_relapse: Yes	months_to_first_progression: 2	mths_to_last_clinical_assessment: 98	months_to_last_contact_or_death: 98	smoking_history: Smoked in the past	surgical_margins: ALL MARGINS PATHOLOGICALLY NEGATIVE	organism_part: Lung	histologic_grade: POORLY DIFFERENTIATED	total RNA	See mage-tab files linked to series entry for additional details	biotin	See mage-tab files linked to series entry for additional details	9606	See mage-tab files linked to series entry for additional details	See mage-tab files linked to series entry for additional details	See mage-tab files linked to series entry for additional details	GPL96	Mervi,,Heiskanen	mervi.heiskanen@nih.gov	2402765175	CBIIT	NCI	9609 Medical Center Drive, 1W378	Rockville	MD	20850	USA	ftp://ftp.ncbi.nlm.nih.gov/geo/samples/GSM1672nnn/GSM1672529/suppl/GSM1672529_CL2004111002AA.CEL.gz	ftp://ftp.ncbi.nlm.nih.gov/geo/samples/GSM1672nnn/GSM1672529/suppl/GSM1672529_CL2004111002AA.mas5.CHP.gz	22283
GSM1672530	Public on May 02 2015	May 01 2015	May 02 2015	RNA	1	DFCI	Homo sapiens	disease_state: Lung Adenocarcinoma	Sex: Male	age: 59	race: Unknown	vital_status: Dead	clinical_treatment_adjuvant_chemo: No	clinical_treatment_adjuvant_rt: No	disease_stage: pN0pT1	first_progression_or_relapse: Yes	months_to_first_progression: 17	mths_to_last_clinical_assessment: 34	months_to_last_contact_or_death: 37	smoking_history: Currently smoking	surgical_margins: ALL MARGINS PATHOLOGICALLY NEGATIVE	organism_part: Lung	histologic_grade: POORLY DIFFERENTIATED	total RNA	See mage-tab files linked to series entry for additional details	biotin	See mage-tab files linked to series entry for additional details	9606	See mage-tab files linked to series entry for additional details	See mage-tab files linked to series entry for additional details	See mage-tab files linked to series entry for additional details	GPL96	Mervi,,Heiskanen	mervi.heiskanen@nih.gov	2402765175	CBIIT	NCI	9609 Medical Center Drive, 1W378	Rockville	MD	20850	USA	ftp://ftp.ncbi.nlm.nih.gov/geo/samples/GSM1672nnn/GSM1672530/suppl/GSM1672530_CL2004111043AA.CEL.gz	ftp://ftp.ncbi.nlm.nih.gov/geo/samples/GSM1672nnn/GSM1672530/suppl/GSM1672530_CL2004111043AA.mas5.CHP.gz	22283
GSM1672531	Public on May 02 2015	May 01 2015	May 02 2015	RNA	1	DFCI	Homo sapiens	disease_state: Lung Adenocarcinoma	Sex: Female	age: 60	race: Unknown	vital_status: Alive	clinical_treatment_adjuvant_chemo: Yes	clinical_treatment_adjuvant_rt: No	disease_stage: pN0pT2	first_progression_or_relapse: No	months_to_first_progression: --	mths_to_last_clinical_assessment: 90	months_to_last_contact_or_death: 90	smoking_history: Smoked in the past	surgical_margins: ALL MARGINS PATHOLOGICALLY NEGATIVE	organism_part: Lung	histologic_grade: Moderate Differentiation	total RNA	See mage-tab files linked to series entry for additional details	biotin	See mage-tab files linked to series entry for additional details	9606	See mage-tab files linked to series entry for additional details	See mage-tab files linked to series entry for additional details	See mage-tab files linked to series entry for additional details	GPL96	Mervi,,Heiskanen	mervi.heiskanen@nih.gov	2402765175	CBIIT	NCI	9609 Medical Center Drive, 1W378	Rockville	MD	20850	USA	ftp://ftp.ncbi.nlm.nih.gov/geo/samples/GSM1672nnn/GSM1672531/suppl/GSM1672531_CL2005060326AA.CEL.gz	ftp://ftp.ncbi.nlm.nih.gov/geo/samples/GSM1672nnn/GSM1672531/suppl/GSM1672531_CL2005060326AA.mas5.CHP.gz	22283
GSM1672532	Public on May 02 2015	May 01 2015	May 02 2015	RNA	1	DFCI	Homo sapiens	disease_state: Lung Adenocarcinoma	Sex: Male	age: 43	race: White	vital_status: Alive	clinical_treatment_adjuvant_chemo: No	clinical_treatment_adjuvant_rt: No	disease_stage: pN1pT1	first_progression_or_relapse: Yes	months_to_first_progression: 11	mths_to_last_clinical_assessment: 40	months_to_last_contact_or_death: 40	smoking_history: Smoked in the past	surgical_margins: ALL MARGINS PATHOLOGICALLY NEGATIVE	organism_part: Lung	histologic_grade: POORLY DIFFERENTIATED	total RNA	See mage-tab files linked to series entry for additional details	biotin	See mage-tab files linked to series entry for additional details	9606	See mage-tab files linked to series entry for additional details	See mage-tab files linked to series entry for additional details	See mage-tab files linked to series entry for additional details	GPL96	Mervi,,Heiskanen	mervi.heiskanen@nih.gov	2402765175	CBIIT	NCI	9609 Medical Center Drive, 1W378	Rockville	MD	20850	USA	ftp://ftp.ncbi.nlm.nih.gov/geo/samples/GSM1672nnn/GSM1672532/suppl/GSM1672532_CL2005060345AA.CEL.gz	ftp://ftp.ncbi.nlm.nih.gov/geo/samples/GSM1672nnn/GSM1672532/suppl/GSM1672532_CL2005060345AA.mas5.CHP.gz	22283
GSM1672533	Public on May 02 2015	May 01 2015	May 02 2015	RNA	1	DFCI	Homo sapiens	disease_state: Lung Adenocarcinoma	Sex: Male	age: 54	race: Unknown	vital_status: Dead	clinical_treatment_adjuvant_chemo: Yes	clinical_treatment_adjuvant_rt: No	disease_stage: pN0pT2	first_progression_or_relapse: Yes	months_to_first_progression: 58	mths_to_last_clinical_assessment: 71	months_to_last_contact_or_death: 71	smoking_history: Smoked in the past	surgical_margins: ALL MARGINS PATHOLOGICALLY NEGATIVE	organism_part: Lung	histologic_grade: WELL DIFFERENTIATED	total RNA	See mage-tab files linked to series entry for additional details	biotin	See mage-tab files linked to series entry for additional details	9606	See mage-tab files linked to series entry for additional details	See mage-tab files linked to series entry for additional details	See mage-tab files linked to series entry for additional details	GPL96	Mervi,,Heiskanen	mervi.heiskanen@nih.gov	2402765175	CBIIT	NCI	9609 Medical Center Drive, 1W378	Rockville	MD	20850	USA	ftp://ftp.ncbi.nlm.nih.gov/geo/samples/GSM1672nnn/GSM1672533/suppl/GSM1672533_CL2004111046AA.CEL.gz	ftp://ftp.ncbi.nlm.nih.gov/geo/samples/GSM1672nnn/GSM1672533/suppl/GSM1672533_CL2004111046AA.mas5.CHP.gz	22283
GSM1672534	Public on May 02 2015	May 01 2015	May 02 2015	RNA	1	DFCI	Homo sapiens	disease_state: Lung Adenocarcinoma	Sex: Female	age: 52	race: Unknown	vital_status: Dead	clinical_treatment_adjuvant_chemo: Yes	clinical_treatment_adjuvant_rt: No	disease_stage: pN1pT2	first_progression_or_relapse: Yes	months_to_first_progression: 3	mths_to_last_clinical_assessment: 9	months_to_last_contact_or_death: 9	smoking_history: Smoked in the past	surgical_margins: ALL MARGINS PATHOLOGICALLY NEGATIVE	organism_part: Lung	histologic_grade: WELL DIFFERENTIATED	total RNA	See mage-tab files linked to series entry for additional details	biotin	See mage-tab files linked to series entry for additional details	9606	See mage-tab files linked to series entry for additional details	See mage-tab files linked to series entry for additional details	See mage-tab files linked to series entry for additional details	GPL96	Mervi,,Heiskanen	mervi.heiskanen@nih.gov	2402765175	CBIIT	NCI	9609 Medical Center Drive, 1W378	Rockville	MD	20850	USA	ftp://ftp.ncbi.nlm.nih.gov/geo/samples/GSM1672nnn/GSM1672534/suppl/GSM1672534_CL20041116136AA.CEL.gz	ftp://ftp.ncbi.nlm.nih.gov/geo/samples/GSM1672nnn/GSM1672534/suppl/GSM1672534_CL20041116136AA.mas5.CHP.gz	22283
GSM1672535	Public on May 02 2015	May 01 2015	May 02 2015	RNA	1	DFCI	Homo sapiens	disease_state: Lung Adenocarcinoma	Sex: Male	age: 47	race: Unknown	vital_status: Alive	clinical_treatment_adjuvant_chemo: Yes	clinical_treatment_adjuvant_rt: No	disease_stage: pN0pT2	first_progression_or_relapse: No	months_to_first_progression: --	mths_to_last_clinical_assessment: 110	months_to_last_contact_or_death: 110	smoking_history: Smoked in the past	surgical_margins: ALL MARGINS PATHOLOGICALLY NEGATIVE	organism_part: Lung	histologic_grade: Moderate Differentiation	total RNA	See mage-tab files linked to series entry for additional details	biotin	See mage-tab files linked to series entry for additional details	9606	See mage-tab files linked to series entry for additional details	See mage-tab files linked to series entry for additional details	See mage-tab files linked to series entry for additional details	GPL96	Mervi,,Heiskanen	mervi.heiskanen@nih.gov	2402765175	CBIIT	NCI	9609 Medical Center Drive, 1W378	Rockville	MD	20850	USA	ftp://ftp.ncbi.nlm.nih.gov/geo/samples/GSM1672nnn/GSM1672535/suppl/GSM1672535_CL2004111003AA.CEL.gz	ftp://ftp.ncbi.nlm.nih.gov/geo/samples/GSM1672nnn/GSM1672535/suppl/GSM1672535_CL2004111003AA.mas5.CHP.gz	22283
GSM1672536	Public on May 02 2015	May 01 2015	May 02 2015	RNA	1	DFCI	Homo sapiens	disease_state: Lung Adenocarcinoma	Sex: Female	age: 55	race: Unknown	vital_status: Alive	clinical_treatment_adjuvant_chemo: No	clinical_treatment_adjuvant_rt: No	disease_stage: pN0pT2	first_progression_or_relapse: No	months_to_first_progression: --	mths_to_last_clinical_assessment: 110	months_to_last_contact_or_death: 110	smoking_history: Smoked in the past	surgical_margins: ALL MARGINS PATHOLOGICALLY NEGATIVE	organism_part: Lung	histologic_grade: POORLY DIFFERENTIATED	total RNA	See mage-tab files linked to series entry for additional details	biotin	See mage-tab files linked to series entry for additional details	9606	See mage-tab files linked to series entry for additional details	See mage-tab files linked to series entry for additional details	See mage-tab files linked to series entry for additional details	GPL96	Mervi,,Heiskanen	mervi.heiskanen@nih.gov	2402765175	CBIIT	NCI	9609 Medical Center Drive, 1W378	Rockville	MD	20850	USA	ftp://ftp.ncbi.nlm.nih.gov/geo/samples/GSM1672nnn/GSM1672536/suppl/GSM1672536_CL2004110909AA.CEL.gz	ftp://ftp.ncbi.nlm.nih.gov/geo/samples/GSM1672nnn/GSM1672536/suppl/GSM1672536_CL2004110909AA.mas5.CHP.gz	22283
GSM1672537	Public on May 02 2015	May 01 2015	May 02 2015	RNA	1	DFCI	Homo sapiens	disease_state: Lung Adenocarcinoma	Sex: Female	age: 66	race: Unknown	vital_status: Dead	clinical_treatment_adjuvant_chemo: Yes	clinical_treatment_adjuvant_rt: No	disease_stage: pN0pT2	first_progression_or_relapse: Yes	months_to_first_progression: 3	mths_to_last_clinical_assessment: 2.96	months_to_last_contact_or_death: 6	smoking_history: Never smoked	surgical_margins: ALL MARGINS PATHOLOGICALLY NEGATIVE	organism_part: Lung	histologic_grade: POORLY DIFFERENTIATED	total RNA	See mage-tab files linked to series entry for additional details	biotin	See mage-tab files linked to series entry for additional details	9606	See mage-tab files linked to series entry for additional details	See mage-tab files linked to series entry for additional details	See mage-tab files linked to series entry for additional details	GPL96	Mervi,,Heiskanen	mervi.heiskanen@nih.gov	2402765175	CBIIT	NCI	9609 Medical Center Drive, 1W378	Rockville	MD	20850	USA	ftp://ftp.ncbi.nlm.nih.gov/geo/samples/GSM1672nnn/GSM1672537/suppl/GSM1672537_CL2004111017AA.CEL.gz	ftp://ftp.ncbi.nlm.nih.gov/geo/samples/GSM1672nnn/GSM1672537/suppl/GSM1672537_CL2004111017AA.mas5.CHP.gz	22283
GSM1672538	Public on May 02 2015	May 01 2015	May 02 2015	RNA	1	DFCI	Homo sapiens	disease_state: Lung Adenocarcinoma	Sex: Female	age: 70	race: Unknown	vital_status: Dead	clinical_treatment_adjuvant_chemo: Yes	clinical_treatment_adjuvant_rt: No	disease_stage: pN1pT1	first_progression_or_relapse: Yes	months_to_first_progression: 77	mths_to_last_clinical_assessment: 90	months_to_last_contact_or_death: 95	smoking_history: Smoked in the past	surgical_margins: ALL MARGINS PATHOLOGICALLY NEGATIVE	organism_part: Lung	histologic_grade: POORLY DIFFERENTIATED	total RNA	See mage-tab files linked to series entry for additional details	biotin	See mage-tab files linked to series entry for additional details	9606	See mage-tab files linked to series entry for additional details	See mage-tab files linked to series entry for additional details	See mage-tab files linked to series entry for additional details	GPL96	Mervi,,Heiskanen	mervi.heiskanen@nih.gov	2402765175	CBIIT	NCI	9609 Medical Center Drive, 1W378	Rockville	MD	20850	USA	ftp://ftp.ncbi.nlm.nih.gov/geo/samples/GSM1672nnn/GSM1672538/suppl/GSM1672538_CL2004111033AA.CEL.gz	ftp://ftp.ncbi.nlm.nih.gov/geo/samples/GSM1672nnn/GSM1672538/suppl/GSM1672538_CL2004111033AA.mas5.CHP.gz	22283
GSM1672539	Public on May 02 2015	May 01 2015	May 02 2015	RNA	1	DFCI	Homo sapiens	disease_state: Lung Adenocarcinoma	Sex: Male	age: 68	race: Unknown	vital_status: Dead	clinical_treatment_adjuvant_chemo: Yes	clinical_treatment_adjuvant_rt: No	disease_stage: pN0pT2	first_progression_or_relapse: Yes	months_to_first_progression: 35	mths_to_last_clinical_assessment: 35.36	months_to_last_contact_or_death: 38	smoking_history: Smoked in the past	surgical_margins: ALL MARGINS PATHOLOGICALLY NEGATIVE	organism_part: Lung	histologic_grade: Moderate Differentiation	total RNA	See mage-tab files linked to series entry for additional details	biotin	See mage-tab files linked to series entry for additional details	9606	See mage-tab files linked to series entry for additional details	See mage-tab files linked to series entry for additional details	See mage-tab files linked to series entry for additional details	GPL96	Mervi,,Heiskanen	mervi.heiskanen@nih.gov	2402765175	CBIIT	NCI	9609 Medical Center Drive, 1W378	Rockville	MD	20850	USA	ftp://ftp.ncbi.nlm.nih.gov/geo/samples/GSM1672nnn/GSM1672539/suppl/GSM1672539_CL2004111040AA.CEL.gz	ftp://ftp.ncbi.nlm.nih.gov/geo/samples/GSM1672nnn/GSM1672539/suppl/GSM1672539_CL2004111040AA.mas5.CHP.gz	22283
GSM1672540	Public on May 02 2015	May 01 2015	May 02 2015	RNA	1	DFCI	Homo sapiens	disease_state: Lung Adenocarcinoma	Sex: Female	age: 61	race: Unknown	vital_status: Dead	clinical_treatment_adjuvant_chemo: No	clinical_treatment_adjuvant_rt: No	disease_stage: pN0pT2	first_progression_or_relapse: Yes	months_to_first_progression: 5	mths_to_last_clinical_assessment: 7	months_to_last_contact_or_death: 9	smoking_history: Smoked in the past	surgical_margins: ALL MARGINS PATHOLOGICALLY NEGATIVE	organism_part: Lung	histologic_grade: POORLY DIFFERENTIATED	total RNA	See mage-tab files linked to series entry for additional details	biotin	See mage-tab files linked to series entry for additional details	9606	See mage-tab files linked to series entry for additional details	See mage-tab files linked to series entry for additional details	See mage-tab files linked to series entry for additional details	GPL96	Mervi,,Heiskanen	mervi.heiskanen@nih.gov	2402765175	CBIIT	NCI	9609 Medical Center Drive, 1W378	Rockville	MD	20850	USA	ftp://ftp.ncbi.nlm.nih.gov/geo/samples/GSM1672nnn/GSM1672540/suppl/GSM1672540_CL2005060338AA.CEL.gz	ftp://ftp.ncbi.nlm.nih.gov/geo/samples/GSM1672nnn/GSM1672540/suppl/GSM1672540_CL2005060338AA.mas5.CHP.gz	22283
GSM1672541	Public on May 02 2015	May 01 2015	May 02 2015	RNA	1	DFCI	Homo sapiens	disease_state: Lung Adenocarcinoma	Sex: Female	age: 60	race: Unknown	vital_status: Alive	clinical_treatment_adjuvant_chemo: No	clinical_treatment_adjuvant_rt: No	disease_stage: pN0pT2	first_progression_or_relapse: No	months_to_first_progression: --	mths_to_last_clinical_assessment: 87	months_to_last_contact_or_death: 87	smoking_history: Smoked in the past	surgical_margins: ALL MARGINS PATHOLOGICALLY NEGATIVE	organism_part: Lung	histologic_grade: Moderate Differentiation	total RNA	See mage-tab files linked to series entry for additional details	biotin	See mage-tab files linked to series entry for additional details	9606	See mage-tab files linked to series entry for additional details	See mage-tab files linked to series entry for additional details	See mage-tab files linked to series entry for additional details	GPL96	Mervi,,Heiskanen	mervi.heiskanen@nih.gov	2402765175	CBIIT	NCI	9609 Medical Center Drive, 1W378	Rockville	MD	20850	USA	ftp://ftp.ncbi.nlm.nih.gov/geo/samples/GSM1672nnn/GSM1672541/suppl/GSM1672541_CL2004111044AA.CEL.gz	ftp://ftp.ncbi.nlm.nih.gov/geo/samples/GSM1672nnn/GSM1672541/suppl/GSM1672541_CL2004111044AA.mas5.CHP.gz	22283
GSM1672542	Public on May 02 2015	May 01 2015	May 02 2015	RNA	1	DFCI	Homo sapiens	disease_state: Lung Adenocarcinoma	Sex: Male	age: 35	race: Unknown	vital_status: Alive	clinical_treatment_adjuvant_chemo: No	clinical_treatment_adjuvant_rt: No	disease_stage: pN0pT2	first_progression_or_relapse: No	months_to_first_progression: --	mths_to_last_clinical_assessment: 88	months_to_last_contact_or_death: 88	smoking_history: Smoked in the past	surgical_margins: ALL MARGINS PATHOLOGICALLY NEGATIVE	organism_part: Lung	histologic_grade: WELL DIFFERENTIATED	total RNA	See mage-tab files linked to series entry for additional details	biotin	See mage-tab files linked to series entry for additional details	9606	See mage-tab files linked to series entry for additional details	See mage-tab files linked to series entry for additional details	See mage-tab files linked to series entry for additional details	GPL96	Mervi,,Heiskanen	mervi.heiskanen@nih.gov	2402765175	CBIIT	NCI	9609 Medical Center Drive, 1W378	Rockville	MD	20850	USA	ftp://ftp.ncbi.nlm.nih.gov/geo/samples/GSM1672nnn/GSM1672542/suppl/GSM1672542_CL20041116127AA.CEL.gz	ftp://ftp.ncbi.nlm.nih.gov/geo/samples/GSM1672nnn/GSM1672542/suppl/GSM1672542_CL20041116127AA.mas5.CHP.gz	22283
GSM1672543	Public on May 02 2015	May 01 2015	May 02 2015	RNA	1	DFCI	Homo sapiens	disease_state: Lung Adenocarcinoma	Sex: Female	age: 53	race: Unknown	vital_status: Alive	clinical_treatment_adjuvant_chemo: No	clinical_treatment_adjuvant_rt: No	disease_stage: pN1pT2	first_progression_or_relapse: No	months_to_first_progression: --	mths_to_last_clinical_assessment: 74	months_to_last_contact_or_death: 74	smoking_history: Smoked in the past	surgical_margins: ALL MARGINS PATHOLOGICALLY NEGATIVE	organism_part: Lung	histologic_grade: Moderate Differentiation	total RNA	See mage-tab files linked to series entry for additional details	biotin	See mage-tab files linked to series entry for additional details	9606	See mage-tab files linked to series entry for additional details	See mage-tab files linked to series entry for additional details	See mage-tab files linked to series entry for additional details	GPL96	Mervi,,Heiskanen	mervi.heiskanen@nih.gov	2402765175	CBIIT	NCI	9609 Medical Center Drive, 1W378	Rockville	MD	20850	USA	ftp://ftp.ncbi.nlm.nih.gov/geo/samples/GSM1672nnn/GSM1672543/suppl/GSM1672543_CL2004111048AA.CEL.gz	ftp://ftp.ncbi.nlm.nih.gov/geo/samples/GSM1672nnn/GSM1672543/suppl/GSM1672543_CL2004111048AA.mas5.CHP.gz	22283
GSM1672544	Public on May 02 2015	May 01 2015	May 02 2015	RNA	1	DFCI	Homo sapiens	disease_state: Lung Adenocarcinoma	Sex: Male	age: 54	race: Unknown	vital_status: Dead	clinical_treatment_adjuvant_chemo: Yes	clinical_treatment_adjuvant_rt: No	disease_stage: pN1pT2	first_progression_or_relapse: Yes	months_to_first_progression: 6	mths_to_last_clinical_assessment: --	months_to_last_contact_or_death: 8	smoking_history: Smoked in the past	surgical_margins: ALL MARGINS PATHOLOGICALLY NEGATIVE	organism_part: Lung	histologic_grade: Moderate Differentiation	total RNA	See mage-tab files linked to series entry for additional details	biotin	See mage-tab files linked to series entry for additional details	9606	See mage-tab files linked to series entry for additional details	See mage-tab files linked to series entry for additional details	See mage-tab files linked to series entry for additional details	GPL96	Mervi,,Heiskanen	mervi.heiskanen@nih.gov	2402765175	CBIIT	NCI	9609 Medical Center Drive, 1W378	Rockville	MD	20850	USA	ftp://ftp.ncbi.nlm.nih.gov/geo/samples/GSM1672nnn/GSM1672544/suppl/GSM1672544_CL2005060327AA.CEL.gz	ftp://ftp.ncbi.nlm.nih.gov/geo/samples/GSM1672nnn/GSM1672544/suppl/GSM1672544_CL2005060327AA.mas5.CHP.gz	22283
GSM1672545	Public on May 02 2015	May 01 2015	May 02 2015	RNA	1	DFCI	Homo sapiens	disease_state: Lung Adenocarcinoma	Sex: Female	age: 73	race: White	vital_status: Alive	clinical_treatment_adjuvant_chemo: Yes	clinical_treatment_adjuvant_rt: No	disease_stage: pN0pT2	first_progression_or_relapse: Yes	months_to_first_progression: 44	mths_to_last_clinical_assessment: 59	months_to_last_contact_or_death: 59	smoking_history: Smoked in the past	surgical_margins: ALL MARGINS PATHOLOGICALLY NEGATIVE	organism_part: Lung	histologic_grade: WELL DIFFERENTIATED	total RNA	See mage-tab files linked to series entry for additional details	biotin	See mage-tab files linked to series entry for additional details	9606	See mage-tab files linked to series entry for additional details	See mage-tab files linked to series entry for additional details	See mage-tab files linked to series entry for additional details	GPL96	Mervi,,Heiskanen	mervi.heiskanen@nih.gov	2402765175	CBIIT	NCI	9609 Medical Center Drive, 1W378	Rockville	MD	20850	USA	ftp://ftp.ncbi.nlm.nih.gov/geo/samples/GSM1672nnn/GSM1672545/suppl/GSM1672545_CL20041119167AA.CEL.gz	ftp://ftp.ncbi.nlm.nih.gov/geo/samples/GSM1672nnn/GSM1672545/suppl/GSM1672545_CL20041119167AA.mas5.CHP.gz	22283
GSM1672546	Public on May 02 2015	May 01 2015	May 02 2015	RNA	1	DFCI	Homo sapiens	disease_state: Lung Adenocarcinoma	Sex: Female	age: 38	race: Unknown	vital_status: Alive	clinical_treatment_adjuvant_chemo: Yes	clinical_treatment_adjuvant_rt: No	disease_stage: pN0pT2	first_progression_or_relapse: No	months_to_first_progression: --	mths_to_last_clinical_assessment: 55	months_to_last_contact_or_death: 55	smoking_history: Smoked in the past	surgical_margins: ALL MARGINS PATHOLOGICALLY NEGATIVE	organism_part: Lung	histologic_grade: POORLY DIFFERENTIATED	total RNA	See mage-tab files linked to series entry for additional details	biotin	See mage-tab files linked to series entry for additional details	9606	See mage-tab files linked to series entry for additional details	See mage-tab files linked to series entry for additional details	See mage-tab files linked to series entry for additional details	GPL96	Mervi,,Heiskanen	mervi.heiskanen@nih.gov	2402765175	CBIIT	NCI	9609 Medical Center Drive, 1W378	Rockville	MD	20850	USA	ftp://ftp.ncbi.nlm.nih.gov/geo/samples/GSM1672nnn/GSM1672546/suppl/GSM1672546_CL2005060344AA.CEL.gz	ftp://ftp.ncbi.nlm.nih.gov/geo/samples/GSM1672nnn/GSM1672546/suppl/GSM1672546_CL2005060344AA.mas5.CHP.gz	22283
GSM1672547	Public on May 02 2015	May 01 2015	May 02 2015	RNA	1	DFCI	Homo sapiens	disease_state: Lung Adenocarcinoma	Sex: Male	age: 58	race: White	vital_status: Alive	clinical_treatment_adjuvant_chemo: No	clinical_treatment_adjuvant_rt: No	disease_stage: pN0pT2	first_progression_or_relapse: No	months_to_first_progression: --	mths_to_last_clinical_assessment: 36	months_to_last_contact_or_death: 36	smoking_history: Smoked in the past	surgical_margins: ALL MARGINS PATHOLOGICALLY NEGATIVE	organism_part: Lung	histologic_grade: POORLY DIFFERENTIATED	total RNA	See mage-tab files linked to series entry for additional details	biotin	See mage-tab files linked to series entry for additional details	9606	See mage-tab files linked to series entry for additional details	See mage-tab files linked to series entry for additional details	See mage-tab files linked to series entry for additional details	GPL96	Mervi,,Heiskanen	mervi.heiskanen@nih.gov	2402765175	CBIIT	NCI	9609 Medical Center Drive, 1W378	Rockville	MD	20850	USA	ftp://ftp.ncbi.nlm.nih.gov/geo/samples/GSM1672nnn/GSM1672547/suppl/GSM1672547_CL2005060346AA.CEL.gz	ftp://ftp.ncbi.nlm.nih.gov/geo/samples/GSM1672nnn/GSM1672547/suppl/GSM1672547_CL2005060346AA.mas5.CHP.gz	22283
GSM1672548	Public on May 02 2015	May 01 2015	May 02 2015	RNA	1	DFCI	Homo sapiens	disease_state: Lung Adenocarcinoma	Sex: Male	age: 65	race: Unknown	vital_status: Dead	clinical_treatment_adjuvant_chemo: Yes	clinical_treatment_adjuvant_rt: No	disease_stage: pN0pT2	first_progression_or_relapse: Yes	months_to_first_progression: 7	mths_to_last_clinical_assessment: --	months_to_last_contact_or_death: 15	smoking_history: Smoked in the past	surgical_margins: ALL MARGINS PATHOLOGICALLY NEGATIVE	organism_part: Lung	histologic_grade: Moderate Differentiation	total RNA	See mage-tab files linked to series entry for additional details	biotin	See mage-tab files linked to series entry for additional details	9606	See mage-tab files linked to series entry for additional details	See mage-tab files linked to series entry for additional details	See mage-tab files linked to series entry for additional details	GPL96	Mervi,,Heiskanen	mervi.heiskanen@nih.gov	2402765175	CBIIT	NCI	9609 Medical Center Drive, 1W378	Rockville	MD	20850	USA	ftp://ftp.ncbi.nlm.nih.gov/geo/samples/GSM1672nnn/GSM1672548/suppl/GSM1672548_CL2004111041AA.CEL.gz	ftp://ftp.ncbi.nlm.nih.gov/geo/samples/GSM1672nnn/GSM1672548/suppl/GSM1672548_CL2004111041AA.mas5.CHP.gz	22283
GSM1672549	Public on May 02 2015	May 01 2015	May 02 2015	RNA	1	DFCI	Homo sapiens	disease_state: Lung Adenocarcinoma	Sex: Female	age: 66	race: Unknown	vital_status: Alive	clinical_treatment_adjuvant_chemo: Yes	clinical_treatment_adjuvant_rt: No	disease_stage: pN0pT2	first_progression_or_relapse: No	months_to_first_progression: --	mths_to_last_clinical_assessment: 85	months_to_last_contact_or_death: 85	smoking_history: Never smoked	surgical_margins: ALL MARGINS PATHOLOGICALLY NEGATIVE	organism_part: Lung	histologic_grade: POORLY DIFFERENTIATED	total RNA	See mage-tab files linked to series entry for additional details	biotin	See mage-tab files linked to series entry for additional details	9606	See mage-tab files linked to series entry for additional details	See mage-tab files linked to series entry for additional details	See mage-tab files linked to series entry for additional details	GPL96	Mervi,,Heiskanen	mervi.heiskanen@nih.gov	2402765175	CBIIT	NCI	9609 Medical Center Drive, 1W378	Rockville	MD	20850	USA	ftp://ftp.ncbi.nlm.nih.gov/geo/samples/GSM1672nnn/GSM1672549/suppl/GSM1672549_CL20041116126AA.CEL.gz	ftp://ftp.ncbi.nlm.nih.gov/geo/samples/GSM1672nnn/GSM1672549/suppl/GSM1672549_CL20041116126AA.mas5.CHP.gz	22283
GSM1672550	Public on May 02 2015	May 01 2015	May 02 2015	RNA	1	DFCI	Homo sapiens	disease_state: Lung Adenocarcinoma	Sex: Male	age: 66	race: Unknown	vital_status: Dead	clinical_treatment_adjuvant_chemo: No	clinical_treatment_adjuvant_rt: No	disease_stage: pN1pT2	first_progression_or_relapse: Yes	months_to_first_progression: 6	mths_to_last_clinical_assessment: 7	months_to_last_contact_or_death: 9	smoking_history: Smoked in the past	surgical_margins: ALL MARGINS PATHOLOGICALLY NEGATIVE	organism_part: Lung	histologic_grade: POORLY DIFFERENTIATED	total RNA	See mage-tab files linked to series entry for additional details	biotin	See mage-tab files linked to series entry for additional details	9606	See mage-tab files linked to series entry for additional details	See mage-tab files linked to series entry for additional details	See mage-tab files linked to series entry for additional details	GPL96	Mervi,,Heiskanen	mervi.heiskanen@nih.gov	2402765175	CBIIT	NCI	9609 Medical Center Drive, 1W378	Rockville	MD	20850	USA	ftp://ftp.ncbi.nlm.nih.gov/geo/samples/GSM1672nnn/GSM1672550/suppl/GSM1672550_CL20041116134AA.CEL.gz	ftp://ftp.ncbi.nlm.nih.gov/geo/samples/GSM1672nnn/GSM1672550/suppl/GSM1672550_CL20041116134AA.mas5.CHP.gz	22283
GSM1672551	Public on May 02 2015	May 01 2015	May 02 2015	RNA	1	DFCI	Homo sapiens	disease_state: Lung Adenocarcinoma	Sex: Male	age: 76	race: Native Hawaiian or Other Pacific Islander	vital_status: Dead	clinical_treatment_adjuvant_chemo: No	clinical_treatment_adjuvant_rt: No	disease_stage: pN1pT2	first_progression_or_relapse: Yes	months_to_first_progression: 4	mths_to_last_clinical_assessment: --	months_to_last_contact_or_death: 11	smoking_history: Smoked in the past	surgical_margins: ALL MARGINS PATHOLOGICALLY NEGATIVE	organism_part: Lung	histologic_grade: POORLY DIFFERENTIATED	total RNA	See mage-tab files linked to series entry for additional details	biotin	See mage-tab files linked to series entry for additional details	9606	See mage-tab files linked to series entry for additional details	See mage-tab files linked to series entry for additional details	See mage-tab files linked to series entry for additional details	GPL96	Mervi,,Heiskanen	mervi.heiskanen@nih.gov	2402765175	CBIIT	NCI	9609 Medical Center Drive, 1W378	Rockville	MD	20850	USA	ftp://ftp.ncbi.nlm.nih.gov/geo/samples/GSM1672nnn/GSM1672551/suppl/GSM1672551_CL2005060341AA.CEL.gz	ftp://ftp.ncbi.nlm.nih.gov/geo/samples/GSM1672nnn/GSM1672551/suppl/GSM1672551_CL2005060341AA.mas5.CHP.gz	22283
GSM1672552	Public on May 02 2015	May 01 2015	May 02 2015	RNA	1	DFCI	Homo sapiens	disease_state: Lung Adenocarcinoma	Sex: Male	age: 53	race: Unknown	vital_status: Dead	clinical_treatment_adjuvant_chemo: Yes	clinical_treatment_adjuvant_rt: No	disease_stage: pN0pT2	first_progression_or_relapse: Yes	months_to_first_progression: 13	mths_to_last_clinical_assessment: 71	months_to_last_contact_or_death: 79	smoking_history: Smoked in the past	surgical_margins: ALL MARGINS PATHOLOGICALLY NEGATIVE	organism_part: Lung	histologic_grade: POORLY DIFFERENTIATED	total RNA	See mage-tab files linked to series entry for additional details	biotin	See mage-tab files linked to series entry for additional details	9606	See mage-tab files linked to series entry for additional details	See mage-tab files linked to series entry for additional details	See mage-tab files linked to series entry for additional details	GPL96	Mervi,,Heiskanen	mervi.heiskanen@nih.gov	2402765175	CBIIT	NCI	9609 Medical Center Drive, 1W378	Rockville	MD	20850	USA	ftp://ftp.ncbi.nlm.nih.gov/geo/samples/GSM1672nnn/GSM1672552/suppl/GSM1672552_CL2004111010AA.CEL.gz	ftp://ftp.ncbi.nlm.nih.gov/geo/samples/GSM1672nnn/GSM1672552/suppl/GSM1672552_CL2004111010AA.mas5.CHP.gz	22283
GSM1672553	Public on May 02 2015	May 01 2015	May 02 2015	RNA	1	DFCI	Homo sapiens	disease_state: Lung Adenocarcinoma	Sex: Male	age: 60	race: Unknown	vital_status: Alive	clinical_treatment_adjuvant_chemo: No	clinical_treatment_adjuvant_rt: No	disease_stage: pN0pT2	first_progression_or_relapse: No	months_to_first_progression: --	mths_to_last_clinical_assessment: 105	months_to_last_contact_or_death: 105	smoking_history: Smoked in the past	surgical_margins: ALL MARGINS PATHOLOGICALLY NEGATIVE	organism_part: Lung	histologic_grade: Moderate Differentiation	total RNA	See mage-tab files linked to series entry for additional details	biotin	See mage-tab files linked to series entry for additional details	9606	See mage-tab files linked to series entry for additional details	See mage-tab files linked to series entry for additional details	See mage-tab files linked to series entry for additional details	GPL96	Mervi,,Heiskanen	mervi.heiskanen@nih.gov	2402765175	CBIIT	NCI	9609 Medical Center Drive, 1W378	Rockville	MD	20850	USA	ftp://ftp.ncbi.nlm.nih.gov/geo/samples/GSM1672nnn/GSM1672553/suppl/GSM1672553_CL2004111018AA.CEL.gz	ftp://ftp.ncbi.nlm.nih.gov/geo/samples/GSM1672nnn/GSM1672553/suppl/GSM1672553_CL2004111018AA.mas5.CHP.gz	22283
GSM1672554	Public on May 02 2015	May 01 2015	May 02 2015	RNA	1	DFCI	Homo sapiens	disease_state: Lung Adenocarcinoma	Sex: Female	age: 40	race: Unknown	vital_status: Alive	clinical_treatment_adjuvant_chemo: Yes	clinical_treatment_adjuvant_rt: No	disease_stage: pN0pT2	first_progression_or_relapse: No	months_to_first_progression: --	mths_to_last_clinical_assessment: 97	months_to_last_contact_or_death: 97	smoking_history: Smoked in the past	surgical_margins: ALL MARGINS PATHOLOGICALLY NEGATIVE	organism_part: Lung	histologic_grade: POORLY DIFFERENTIATED	total RNA	See mage-tab files linked to series entry for additional details	biotin	See mage-tab files linked to series entry for additional details	9606	See mage-tab files linked to series entry for additional details	See mage-tab files linked to series entry for additional details	See mage-tab files linked to series entry for additional details	GPL96	Mervi,,Heiskanen	mervi.heiskanen@nih.gov	2402765175	CBIIT	NCI	9609 Medical Center Drive, 1W378	Rockville	MD	20850	USA	ftp://ftp.ncbi.nlm.nih.gov/geo/samples/GSM1672nnn/GSM1672554/suppl/GSM1672554_CL2005060339AA.CEL.gz	ftp://ftp.ncbi.nlm.nih.gov/geo/samples/GSM1672nnn/GSM1672554/suppl/GSM1672554_CL2005060339AA.mas5.CHP.gz	22283
GSM1672555	Public on May 02 2015	May 01 2015	May 02 2015	RNA	1	DFCI	Homo sapiens	disease_state: Lung Adenocarcinoma	Sex: Male	age: 67	race: Unknown	vital_status: Dead	clinical_treatment_adjuvant_chemo: No	clinical_treatment_adjuvant_rt: No	disease_stage: pN1pT2	first_progression_or_relapse: Yes	months_to_first_progression: 4	mths_to_last_clinical_assessment: 4	months_to_last_contact_or_death: 4	smoking_history: Smoked in the past	surgical_margins: ALL MARGINS PATHOLOGICALLY NEGATIVE	organism_part: Lung	histologic_grade: POORLY DIFFERENTIATED	total RNA	See mage-tab files linked to series entry for additional details	biotin	See mage-tab files linked to series entry for additional details	9606	See mage-tab files linked to series entry for additional details	See mage-tab files linked to series entry for additional details	See mage-tab files linked to series entry for additional details	GPL96	Mervi,,Heiskanen	mervi.heiskanen@nih.gov	2402765175	CBIIT	NCI	9609 Medical Center Drive, 1W378	Rockville	MD	20850	USA	ftp://ftp.ncbi.nlm.nih.gov/geo/samples/GSM1672nnn/GSM1672555/suppl/GSM1672555_CL2005060332AA.CEL.gz	ftp://ftp.ncbi.nlm.nih.gov/geo/samples/GSM1672nnn/GSM1672555/suppl/GSM1672555_CL2005060332AA.mas5.CHP.gz	22283
GSM1672556	Public on May 02 2015	May 01 2015	May 02 2015	RNA	1	DFCI	Homo sapiens	disease_state: Lung Adenocarcinoma	Sex: Male	age: 62	race: Unknown	vital_status: Dead	clinical_treatment_adjuvant_chemo: Yes	clinical_treatment_adjuvant_rt: No	disease_stage: pN0pT2	first_progression_or_relapse: Yes	months_to_first_progression: 16	mths_to_last_clinical_assessment: 35	months_to_last_contact_or_death: 36	smoking_history: Smoked in the past	surgical_margins: ALL MARGINS PATHOLOGICALLY NEGATIVE	organism_part: Lung	histologic_grade: WELL DIFFERENTIATED	total RNA	See mage-tab files linked to series entry for additional details	biotin	See mage-tab files linked to series entry for additional details	9606	See mage-tab files linked to series entry for additional details	See mage-tab files linked to series entry for additional details	See mage-tab files linked to series entry for additional details	GPL96	Mervi,,Heiskanen	mervi.heiskanen@nih.gov	2402765175	CBIIT	NCI	9609 Medical Center Drive, 1W378	Rockville	MD	20850	USA	ftp://ftp.ncbi.nlm.nih.gov/geo/samples/GSM1672nnn/GSM1672556/suppl/GSM1672556_CL2005060334AA.CEL.gz	ftp://ftp.ncbi.nlm.nih.gov/geo/samples/GSM1672nnn/GSM1672556/suppl/GSM1672556_CL2005060334AA.mas5.CHP.gz	22283
GSM1672557	Public on May 02 2015	May 01 2015	May 02 2015	RNA	1	DFCI	Homo sapiens	disease_state: Lung Adenocarcinoma	Sex: Male	age: 61	race: White	vital_status: Dead	clinical_treatment_adjuvant_chemo: No	clinical_treatment_adjuvant_rt: No	disease_stage: pN1pT1	first_progression_or_relapse: Yes	months_to_first_progression: 25	mths_to_last_clinical_assessment: 43	months_to_last_contact_or_death: 44	smoking_history: Never smoked	surgical_margins: ALL MARGINS PATHOLOGICALLY NEGATIVE	organism_part: Lung	histologic_grade: WELL DIFFERENTIATED	total RNA	See mage-tab files linked to series entry for additional details	biotin	See mage-tab files linked to series entry for additional details	9606	See mage-tab files linked to series entry for additional details	See mage-tab files linked to series entry for additional details	See mage-tab files linked to series entry for additional details	GPL96	Mervi,,Heiskanen	mervi.heiskanen@nih.gov	2402765175	CBIIT	NCI	9609 Medical Center Drive, 1W378	Rockville	MD	20850	USA	ftp://ftp.ncbi.nlm.nih.gov/geo/samples/GSM1672nnn/GSM1672557/suppl/GSM1672557_CL2005060343AA.CEL.gz	ftp://ftp.ncbi.nlm.nih.gov/geo/samples/GSM1672nnn/GSM1672557/suppl/GSM1672557_CL2005060343AA.mas5.CHP.gz	22283
GSM1672558	Public on May 02 2015	May 01 2015	May 02 2015	RNA	1	DFCI	Homo sapiens	disease_state: Lung Adenocarcinoma	Sex: Male	age: 63	race: Unknown	vital_status: Dead	clinical_treatment_adjuvant_chemo: No	clinical_treatment_adjuvant_rt: No	disease_stage: pN1pT2	first_progression_or_relapse: No	months_to_first_progression: --	mths_to_last_clinical_assessment: 63	months_to_last_contact_or_death: 74	smoking_history: Smoked in the past	surgical_margins: ALL MARGINS PATHOLOGICALLY NEGATIVE	organism_part: Lung	histologic_grade: POORLY DIFFERENTIATED	total RNA	See mage-tab files linked to series entry for additional details	biotin	See mage-tab files linked to series entry for additional details	9606	See mage-tab files linked to series entry for additional details	See mage-tab files linked to series entry for additional details	See mage-tab files linked to series entry for additional details	GPL96	Mervi,,Heiskanen	mervi.heiskanen@nih.gov	2402765175	CBIIT	NCI	9609 Medical Center Drive, 1W378	Rockville	MD	20850	USA	ftp://ftp.ncbi.nlm.nih.gov/geo/samples/GSM1672nnn/GSM1672558/suppl/GSM1672558_CL20041119175AA.CEL.gz	ftp://ftp.ncbi.nlm.nih.gov/geo/samples/GSM1672nnn/GSM1672558/suppl/GSM1672558_CL20041119175AA.mas5.CHP.gz	22283
GSM1672559	Public on May 02 2015	May 01 2015	May 02 2015	RNA	1	DFCI	Homo sapiens	disease_state: Lung Adenocarcinoma	Sex: Male	age: 62	race: Unknown	vital_status: Dead	clinical_treatment_adjuvant_chemo: Yes	clinical_treatment_adjuvant_rt: No	disease_stage: pN1pT2	first_progression_or_relapse: Yes	months_to_first_progression: 4	mths_to_last_clinical_assessment: 12	months_to_last_contact_or_death: 13	smoking_history: Smoked in the past	surgical_margins: ALL MARGINS PATHOLOGICALLY NEGATIVE	organism_part: Lung	histologic_grade: POORLY DIFFERENTIATED	total RNA	See mage-tab files linked to series entry for additional details	biotin	See mage-tab files linked to series entry for additional details	9606	See mage-tab files linked to series entry for additional details	See mage-tab files linked to series entry for additional details	See mage-tab files linked to series entry for additional details	GPL96	Mervi,,Heiskanen	mervi.heiskanen@nih.gov	2402765175	CBIIT	NCI	9609 Medical Center Drive, 1W378	Rockville	MD	20850	USA	ftp://ftp.ncbi.nlm.nih.gov/geo/samples/GSM1672nnn/GSM1672559/suppl/GSM1672559_CL2004111045AA.CEL.gz	ftp://ftp.ncbi.nlm.nih.gov/geo/samples/GSM1672nnn/GSM1672559/suppl/GSM1672559_CL2004111045AA.mas5.CHP.gz	22283
GSM1672560	Public on May 02 2015	May 01 2015	May 02 2015	RNA	1	DFCI	Homo sapiens	disease_state: Lung Adenocarcinoma	Sex: Female	age: 51	race: Unknown	vital_status: Alive	clinical_treatment_adjuvant_chemo: Yes	clinical_treatment_adjuvant_rt: No	disease_stage: pN0pT2	first_progression_or_relapse: No	months_to_first_progression: --	mths_to_last_clinical_assessment: 90	months_to_last_contact_or_death: 90	smoking_history: Smoked in the past	surgical_margins: ALL MARGINS PATHOLOGICALLY NEGATIVE	organism_part: Lung	histologic_grade: POORLY DIFFERENTIATED	total RNA	See mage-tab files linked to series entry for additional details	biotin	See mage-tab files linked to series entry for additional details	9606	See mage-tab files linked to series entry for additional details	See mage-tab files linked to series entry for additional details	See mage-tab files linked to series entry for additional details	GPL96	Mervi,,Heiskanen	mervi.heiskanen@nih.gov	2402765175	CBIIT	NCI	9609 Medical Center Drive, 1W378	Rockville	MD	20850	USA	ftp://ftp.ncbi.nlm.nih.gov/geo/samples/GSM1672nnn/GSM1672560/suppl/GSM1672560_CL2005060328AA.CEL.gz	ftp://ftp.ncbi.nlm.nih.gov/geo/samples/GSM1672nnn/GSM1672560/suppl/GSM1672560_CL2005060328AA.mas5.CHP.gz	22283
GSM1672561	Public on May 02 2015	May 01 2015	May 02 2015	RNA	1	DFCI	Homo sapiens	disease_state: Lung Adenocarcinoma	Sex: Female	age: 53	race: Unknown	vital_status: Alive	clinical_treatment_adjuvant_chemo: Yes	clinical_treatment_adjuvant_rt: No	disease_stage: pN0pT2	first_progression_or_relapse: No	months_to_first_progression: --	mths_to_last_clinical_assessment: 85	months_to_last_contact_or_death: 85	smoking_history: Smoked in the past	surgical_margins: ALL MARGINS PATHOLOGICALLY NEGATIVE	organism_part: Lung	histologic_grade: WELL DIFFERENTIATED	total RNA	See mage-tab files linked to series entry for additional details	biotin	See mage-tab files linked to series entry for additional details	9606	See mage-tab files linked to series entry for additional details	See mage-tab files linked to series entry for additional details	See mage-tab files linked to series entry for additional details	GPL96	Mervi,,Heiskanen	mervi.heiskanen@nih.gov	2402765175	CBIIT	NCI	9609 Medical Center Drive, 1W378	Rockville	MD	20850	USA	ftp://ftp.ncbi.nlm.nih.gov/geo/samples/GSM1672nnn/GSM1672561/suppl/GSM1672561_CL2005060329AA.CEL.gz	ftp://ftp.ncbi.nlm.nih.gov/geo/samples/GSM1672nnn/GSM1672561/suppl/GSM1672561_CL2005060329AA.mas5.CHP.gz	22283
GSM1672562	Public on May 02 2015	May 01 2015	May 02 2015	RNA	1	DFCI	Homo sapiens	disease_state: Lung Adenocarcinoma	Sex: Female	age: 56	race: Unknown	vital_status: Dead	clinical_treatment_adjuvant_chemo: Yes	clinical_treatment_adjuvant_rt: No	disease_stage: pN1pT2	first_progression_or_relapse: Yes	months_to_first_progression: 69	mths_to_last_clinical_assessment: 70	months_to_last_contact_or_death: 71	smoking_history: Smoked in the past	surgical_margins: ALL MARGINS PATHOLOGICALLY NEGATIVE	organism_part: Lung	histologic_grade: POORLY DIFFERENTIATED	total RNA	See mage-tab files linked to series entry for additional details	biotin	See mage-tab files linked to series entry for additional details	9606	See mage-tab files linked to series entry for additional details	See mage-tab files linked to series entry for additional details	See mage-tab files linked to series entry for additional details	GPL96	Mervi,,Heiskanen	mervi.heiskanen@nih.gov	2402765175	CBIIT	NCI	9609 Medical Center Drive, 1W378	Rockville	MD	20850	USA	ftp://ftp.ncbi.nlm.nih.gov/geo/samples/GSM1672nnn/GSM1672562/suppl/GSM1672562_CL2005060333AA.CEL.gz	ftp://ftp.ncbi.nlm.nih.gov/geo/samples/GSM1672nnn/GSM1672562/suppl/GSM1672562_CL2005060333AA.mas5.CHP.gz	22283
GSM1672563	Public on May 02 2015	May 01 2015	May 02 2015	RNA	1	DFCI	Homo sapiens	disease_state: Lung Adenocarcinoma	Sex: Male	age: 61	race: Unknown	vital_status: Dead	clinical_treatment_adjuvant_chemo: Yes	clinical_treatment_adjuvant_rt: No	disease_stage: pN1pT1	first_progression_or_relapse: Yes	months_to_first_progression: 29	mths_to_last_clinical_assessment: 60	months_to_last_contact_or_death: 64	smoking_history: Smoked in the past	surgical_margins: ALL MARGINS PATHOLOGICALLY NEGATIVE	organism_part: Lung	histologic_grade: Moderate Differentiation	total RNA	See mage-tab files linked to series entry for additional details	biotin	See mage-tab files linked to series entry for additional details	9606	See mage-tab files linked to series entry for additional details	See mage-tab files linked to series entry for additional details	See mage-tab files linked to series entry for additional details	GPL96	Mervi,,Heiskanen	mervi.heiskanen@nih.gov	2402765175	CBIIT	NCI	9609 Medical Center Drive, 1W378	Rockville	MD	20850	USA	ftp://ftp.ncbi.nlm.nih.gov/geo/samples/GSM1672nnn/GSM1672563/suppl/GSM1672563_CL2005060337AA.CEL.gz	ftp://ftp.ncbi.nlm.nih.gov/geo/samples/GSM1672nnn/GSM1672563/suppl/GSM1672563_CL2005060337AA.mas5.CHP.gz	22283
GSM1672564	Public on May 02 2015	May 01 2015	May 02 2015	RNA	1	DFCI	Homo sapiens	disease_state: Lung Adenocarcinoma	Sex: Female	age: 52	race: Unknown	vital_status: Dead	clinical_treatment_adjuvant_chemo: Yes	clinical_treatment_adjuvant_rt: No	disease_stage: pN0pT2	first_progression_or_relapse: No	months_to_first_progression: --	mths_to_last_clinical_assessment: 60	months_to_last_contact_or_death: 65	smoking_history: Smoked in the past	surgical_margins: ALL MARGINS PATHOLOGICALLY NEGATIVE	organism_part: Lung	histologic_grade: POORLY DIFFERENTIATED	total RNA	See mage-tab files linked to series entry for additional details	biotin	See mage-tab files linked to series entry for additional details	9606	See mage-tab files linked to series entry for additional details	See mage-tab files linked to series entry for additional details	See mage-tab files linked to series entry for additional details	GPL96	Mervi,,Heiskanen	mervi.heiskanen@nih.gov	2402765175	CBIIT	NCI	9609 Medical Center Drive, 1W378	Rockville	MD	20850	USA	ftp://ftp.ncbi.nlm.nih.gov/geo/samples/GSM1672nnn/GSM1672564/suppl/GSM1672564_CL2005060336AA.CEL.gz	ftp://ftp.ncbi.nlm.nih.gov/geo/samples/GSM1672nnn/GSM1672564/suppl/GSM1672564_CL2005060336AA.mas5.CHP.gz	22283
GSM1672565	Public on May 02 2015	May 01 2015	May 02 2015	RNA	1	DFCI	Homo sapiens	disease_state: Lung Adenocarcinoma	Sex: Male	age: 60	race: White	vital_status: Alive	clinical_treatment_adjuvant_chemo: Yes	clinical_treatment_adjuvant_rt: No	disease_stage: pN0pT2	first_progression_or_relapse: No	months_to_first_progression: --	mths_to_last_clinical_assessment: 68	months_to_last_contact_or_death: 68	smoking_history: Smoked in the past	surgical_margins: ALL MARGINS PATHOLOGICALLY NEGATIVE	organism_part: Lung	histologic_grade: POORLY DIFFERENTIATED	total RNA	See mage-tab files linked to series entry for additional details	biotin	See mage-tab files linked to series entry for additional details	9606	See mage-tab files linked to series entry for additional details	See mage-tab files linked to series entry for additional details	See mage-tab files linked to series entry for additional details	GPL96	Mervi,,Heiskanen	mervi.heiskanen@nih.gov	2402765175	CBIIT	NCI	9609 Medical Center Drive, 1W378	Rockville	MD	20850	USA	ftp://ftp.ncbi.nlm.nih.gov/geo/samples/GSM1672nnn/GSM1672565/suppl/GSM1672565_CL2005060340AA.CEL.gz	ftp://ftp.ncbi.nlm.nih.gov/geo/samples/GSM1672nnn/GSM1672565/suppl/GSM1672565_CL2005060340AA.mas5.CHP.gz	22283
GSM1672566	Public on May 02 2015	May 01 2015	May 02 2015	RNA	1	DFCI	Homo sapiens	disease_state: Lung Adenocarcinoma	Sex: Male	age: 57	race: White	vital_status: Alive	clinical_treatment_adjuvant_chemo: Yes	clinical_treatment_adjuvant_rt: No	disease_stage: pN1pT2	first_progression_or_relapse: No	months_to_first_progression: --	mths_to_last_clinical_assessment: 64	months_to_last_contact_or_death: 64	smoking_history: Smoked in the past	surgical_margins: ALL MARGINS PATHOLOGICALLY NEGATIVE	organism_part: Lung	histologic_grade: WELL DIFFERENTIATED	total RNA	See mage-tab files linked to series entry for additional details	biotin	See mage-tab files linked to series entry for additional details	9606	See mage-tab files linked to series entry for additional details	See mage-tab files linked to series entry for additional details	See mage-tab files linked to series entry for additional details	GPL96	Mervi,,Heiskanen	mervi.heiskanen@nih.gov	2402765175	CBIIT	NCI	9609 Medical Center Drive, 1W378	Rockville	MD	20850	USA	ftp://ftp.ncbi.nlm.nih.gov/geo/samples/GSM1672nnn/GSM1672566/suppl/GSM1672566_CL20041116156AA.CEL.gz	ftp://ftp.ncbi.nlm.nih.gov/geo/samples/GSM1672nnn/GSM1672566/suppl/GSM1672566_CL20041116156AA.mas5.CHP.gz	22283
GSM1672567	Public on May 02 2015	May 01 2015	May 02 2015	RNA	1	DFCI	Homo sapiens	disease_state: Lung Adenocarcinoma	Sex: Female	age: 46	race: White	vital_status: Alive	clinical_treatment_adjuvant_chemo: No	clinical_treatment_adjuvant_rt: No	disease_stage: pN0pT2	first_progression_or_relapse: No	months_to_first_progression: --	mths_to_last_clinical_assessment: 63	months_to_last_contact_or_death: 63	smoking_history: Unknown	surgical_margins: ALL MARGINS PATHOLOGICALLY NEGATIVE	organism_part: Lung	histologic_grade: WELL DIFFERENTIATED	total RNA	See mage-tab files linked to series entry for additional details	biotin	See mage-tab files linked to series entry for additional details	9606	See mage-tab files linked to series entry for additional details	See mage-tab files linked to series entry for additional details	See mage-tab files linked to series entry for additional details	GPL96	Mervi,,Heiskanen	mervi.heiskanen@nih.gov	2402765175	CBIIT	NCI	9609 Medical Center Drive, 1W378	Rockville	MD	20850	USA	ftp://ftp.ncbi.nlm.nih.gov/geo/samples/GSM1672nnn/GSM1672567/suppl/GSM1672567_CL2005060342AA.CEL.gz	ftp://ftp.ncbi.nlm.nih.gov/geo/samples/GSM1672nnn/GSM1672567/suppl/GSM1672567_CL2005060342AA.mas5.CHP.gz	22283
GSM1672568	Public on May 02 2015	May 01 2015	May 02 2015	RNA	1	DFCI	Homo sapiens	disease_state: Lung Adenocarcinoma	Sex: Male	age: 71	race: Unknown	vital_status: Dead	clinical_treatment_adjuvant_chemo: Yes	clinical_treatment_adjuvant_rt: No	disease_stage: pN1pT2	first_progression_or_relapse: Yes	months_to_first_progression: 11	mths_to_last_clinical_assessment: 11	months_to_last_contact_or_death: 13	smoking_history: Smoked in the past	surgical_margins: ALL MARGINS PATHOLOGICALLY NEGATIVE	organism_part: Lung	histologic_grade: Moderate Differentiation	total RNA	See mage-tab files linked to series entry for additional details	biotin	See mage-tab files linked to series entry for additional details	9606	See mage-tab files linked to series entry for additional details	See mage-tab files linked to series entry for additional details	See mage-tab files linked to series entry for additional details	GPL96	Mervi,,Heiskanen	mervi.heiskanen@nih.gov	2402765175	CBIIT	NCI	9609 Medical Center Drive, 1W378	Rockville	MD	20850	USA	ftp://ftp.ncbi.nlm.nih.gov/geo/samples/GSM1672nnn/GSM1672568/suppl/GSM1672568_CL2004111038AA.CEL.gz	ftp://ftp.ncbi.nlm.nih.gov/geo/samples/GSM1672nnn/GSM1672568/suppl/GSM1672568_CL2004111038AA.mas5.CHP.gz	22283
GSM1672569	Public on May 02 2015	May 01 2015	May 02 2015	RNA	1	DFCI	Homo sapiens	disease_state: Lung Adenocarcinoma	Sex: Male	age: 53	race: Not Reported	vital_status: Alive	clinical_treatment_adjuvant_chemo: No	clinical_treatment_adjuvant_rt: No	disease_stage: pN1pT2	first_progression_or_relapse: No	months_to_first_progression: --	mths_to_last_clinical_assessment: 95	months_to_last_contact_or_death: 95	smoking_history: Smoked in the past	surgical_margins: ALL MARGINS PATHOLOGICALLY NEGATIVE	organism_part: Lung	histologic_grade: POORLY DIFFERENTIATED	total RNA	See mage-tab files linked to series entry for additional details	biotin	See mage-tab files linked to series entry for additional details	9606	See mage-tab files linked to series entry for additional details	See mage-tab files linked to series entry for additional details	See mage-tab files linked to series entry for additional details	GPL96	Mervi,,Heiskanen	mervi.heiskanen@nih.gov	2402765175	CBIIT	NCI	9609 Medical Center Drive, 1W378	Rockville	MD	20850	USA	ftp://ftp.ncbi.nlm.nih.gov/geo/samples/GSM1672nnn/GSM1672569/suppl/GSM1672569_CL2005060348AA.CEL.gz	ftp://ftp.ncbi.nlm.nih.gov/geo/samples/GSM1672nnn/GSM1672569/suppl/GSM1672569_CL2005060348AA.mas5.CHP.gz	22283
GSM1672570	Public on May 02 2015	May 01 2015	May 02 2015	RNA	1	DFCI	Homo sapiens	disease_state: Lung Adenocarcinoma	Sex: Male	age: 68	race: Not Reported	vital_status: Alive	clinical_treatment_adjuvant_chemo: No	clinical_treatment_adjuvant_rt: No	disease_stage: pN1pT1	first_progression_or_relapse: No	months_to_first_progression: --	mths_to_last_clinical_assessment: 74	months_to_last_contact_or_death: 74	smoking_history: Smoked in the past	surgical_margins: ALL MARGINS PATHOLOGICALLY NEGATIVE	organism_part: Lung	histologic_grade: POORLY DIFFERENTIATED	total RNA	See mage-tab files linked to series entry for additional details	biotin	See mage-tab files linked to series entry for additional details	9606	See mage-tab files linked to series entry for additional details	See mage-tab files linked to series entry for additional details	See mage-tab files linked to series entry for additional details	GPL96	Mervi,,Heiskanen	mervi.heiskanen@nih.gov	2402765175	CBIIT	NCI	9609 Medical Center Drive, 1W378	Rockville	MD	20850	USA	ftp://ftp.ncbi.nlm.nih.gov/geo/samples/GSM1672nnn/GSM1672570/suppl/GSM1672570_CL2005060349AA.CEL.gz	ftp://ftp.ncbi.nlm.nih.gov/geo/samples/GSM1672nnn/GSM1672570/suppl/GSM1672570_CL2005060349AA.mas5.CHP.gz	22283
GSM1672571	Public on May 02 2015	May 01 2015	May 02 2015	RNA	1	DFCI	Homo sapiens	disease_state: Lung Adenocarcinoma	Sex: Female	age: 72	race: Not Reported	vital_status: Dead	clinical_treatment_adjuvant_chemo: No	clinical_treatment_adjuvant_rt: No	disease_stage: pN1pT2	first_progression_or_relapse: Yes	months_to_first_progression: 56	mths_to_last_clinical_assessment: 57	months_to_last_contact_or_death: 57	smoking_history: Smoked in the past	surgical_margins: ALL MARGINS PATHOLOGICALLY NEGATIVE	organism_part: Lung	histologic_grade: Moderate Differentiation	total RNA	See mage-tab files linked to series entry for additional details	biotin	See mage-tab files linked to series entry for additional details	9606	See mage-tab files linked to series entry for additional details	See mage-tab files linked to series entry for additional details	See mage-tab files linked to series entry for additional details	GPL96	Mervi,,Heiskanen	mervi.heiskanen@nih.gov	2402765175	CBIIT	NCI	9609 Medical Center Drive, 1W378	Rockville	MD	20850	USA	ftp://ftp.ncbi.nlm.nih.gov/geo/samples/GSM1672nnn/GSM1672571/suppl/GSM1672571_CL2005060350AA.CEL.gz	ftp://ftp.ncbi.nlm.nih.gov/geo/samples/GSM1672nnn/GSM1672571/suppl/GSM1672571_CL2005060350AA.mas5.CHP.gz	22283
GSM1672572	Public on May 02 2015	May 01 2015	May 02 2015	RNA	1	DFCI	Homo sapiens	disease_state: Lung Adenocarcinoma	Sex: Female	age: 68	race: Not Reported	vital_status: Dead	clinical_treatment_adjuvant_chemo: No	clinical_treatment_adjuvant_rt: No	disease_stage: pN0pT1	first_progression_or_relapse: Yes	months_to_first_progression: 17	mths_to_last_clinical_assessment: 56	months_to_last_contact_or_death: 56	smoking_history: Smoked in the past	surgical_margins: ALL MARGINS PATHOLOGICALLY NEGATIVE	organism_part: Lung	histologic_grade: Moderate Differentiation	total RNA	See mage-tab files linked to series entry for additional details	biotin	See mage-tab files linked to series entry for additional details	9606	See mage-tab files linked to series entry for additional details	See mage-tab files linked to series entry for additional details	See mage-tab files linked to series entry for additional details	GPL96	Mervi,,Heiskanen	mervi.heiskanen@nih.gov	2402765175	CBIIT	NCI	9609 Medical Center Drive, 1W378	Rockville	MD	20850	USA	ftp://ftp.ncbi.nlm.nih.gov/geo/samples/GSM1672nnn/GSM1672572/suppl/GSM1672572_CL2005060351AA.CEL.gz	ftp://ftp.ncbi.nlm.nih.gov/geo/samples/GSM1672nnn/GSM1672572/suppl/GSM1672572_CL2005060351AA.mas5.CHP.gz	22283
GSM1672573	Public on May 02 2015	May 01 2015	May 02 2015	RNA	1	DFCI	Homo sapiens	disease_state: Lung Adenocarcinoma	Sex: Male	age: 65	race: Not Reported	vital_status: Alive	clinical_treatment_adjuvant_chemo: No	clinical_treatment_adjuvant_rt: No	disease_stage: pN1pT2	first_progression_or_relapse: No	months_to_first_progression: --	mths_to_last_clinical_assessment: 48	months_to_last_contact_or_death: 48	smoking_history: Smoked in the past	surgical_margins: ALL MARGINS PATHOLOGICALLY NEGATIVE	organism_part: Lung	histologic_grade: POORLY DIFFERENTIATED	total RNA	See mage-tab files linked to series entry for additional details	biotin	See mage-tab files linked to series entry for additional details	9606	See mage-tab files linked to series entry for additional details	See mage-tab files linked to series entry for additional details	See mage-tab files linked to series entry for additional details	GPL96	Mervi,,Heiskanen	mervi.heiskanen@nih.gov	2402765175	CBIIT	NCI	9609 Medical Center Drive, 1W378	Rockville	MD	20850	USA	ftp://ftp.ncbi.nlm.nih.gov/geo/samples/GSM1672nnn/GSM1672573/suppl/GSM1672573_CL2005060352AA.CEL.gz	ftp://ftp.ncbi.nlm.nih.gov/geo/samples/GSM1672nnn/GSM1672573/suppl/GSM1672573_CL2005060352AA.mas5.CHP.gz	22283
GSM1672574	Public on May 02 2015	May 01 2015	May 02 2015	RNA	1	DFCI	Homo sapiens	disease_state: Lung Adenocarcinoma	Sex: Female	age: 68	race: Not Reported	vital_status: Alive	clinical_treatment_adjuvant_chemo: No	clinical_treatment_adjuvant_rt: No	disease_stage: pN0pT2	first_progression_or_relapse: Yes	months_to_first_progression: 44	mths_to_last_clinical_assessment: 49	months_to_last_contact_or_death: 49	smoking_history: Never smoked	surgical_margins: ALL MARGINS PATHOLOGICALLY NEGATIVE	organism_part: Lung	histologic_grade: Moderate Differentiation	total RNA	See mage-tab files linked to series entry for additional details	biotin	See mage-tab files linked to series entry for additional details	9606	See mage-tab files linked to series entry for additional details	See mage-tab files linked to series entry for additional details	See mage-tab files linked to series entry for additional details	GPL96	Mervi,,Heiskanen	mervi.heiskanen@nih.gov	2402765175	CBIIT	NCI	9609 Medical Center Drive, 1W378	Rockville	MD	20850	USA	ftp://ftp.ncbi.nlm.nih.gov/geo/samples/GSM1672nnn/GSM1672574/suppl/GSM1672574_CL2005060353AA.CEL.gz	ftp://ftp.ncbi.nlm.nih.gov/geo/samples/GSM1672nnn/GSM1672574/suppl/GSM1672574_CL2005060353AA.mas5.CHP.gz	22283
GSM1672575	Public on May 02 2015	May 01 2015	May 02 2015	RNA	1	DFCI	Homo sapiens	disease_state: Lung Adenocarcinoma	Sex: Male	age: 68	race: Not Reported	vital_status: Alive	clinical_treatment_adjuvant_chemo: No	clinical_treatment_adjuvant_rt: No	disease_stage: pN0pT1	first_progression_or_relapse: --	months_to_first_progression: --	mths_to_last_clinical_assessment: 28	months_to_last_contact_or_death: 28	smoking_history: Smoked in the past	surgical_margins: ALL MARGINS PATHOLOGICALLY NEGATIVE	organism_part: Lung	histologic_grade: Moderate Differentiation	total RNA	See mage-tab files linked to series entry for additional details	biotin	See mage-tab files linked to series entry for additional details	9606	See mage-tab files linked to series entry for additional details	See mage-tab files linked to series entry for additional details	See mage-tab files linked to series entry for additional details	GPL96	Mervi,,Heiskanen	mervi.heiskanen@nih.gov	2402765175	CBIIT	NCI	9609 Medical Center Drive, 1W378	Rockville	MD	20850	USA	ftp://ftp.ncbi.nlm.nih.gov/geo/samples/GSM1672nnn/GSM1672575/suppl/GSM1672575_CL2005060354AA.CEL.gz	ftp://ftp.ncbi.nlm.nih.gov/geo/samples/GSM1672nnn/GSM1672575/suppl/GSM1672575_CL2005060354AA.mas5.CHP.gz	22283
GSM1672576	Public on May 02 2015	May 01 2015	May 02 2015	RNA	1	DFCI	Homo sapiens	disease_state: Lung Adenocarcinoma	Sex: Female	age: 57	race: Not Reported	vital_status: Alive	clinical_treatment_adjuvant_chemo: No	clinical_treatment_adjuvant_rt: No	disease_stage: pN0pT2	first_progression_or_relapse: --	months_to_first_progression: --	mths_to_last_clinical_assessment: 36	months_to_last_contact_or_death: 36	smoking_history: Smoked in the past	surgical_margins: ALL MARGINS PATHOLOGICALLY NEGATIVE	organism_part: Lung	histologic_grade: Moderate Differentiation	total RNA	See mage-tab files linked to series entry for additional details	biotin	See mage-tab files linked to series entry for additional details	9606	See mage-tab files linked to series entry for additional details	See mage-tab files linked to series entry for additional details	See mage-tab files linked to series entry for additional details	GPL96	Mervi,,Heiskanen	mervi.heiskanen@nih.gov	2402765175	CBIIT	NCI	9609 Medical Center Drive, 1W378	Rockville	MD	20850	USA	ftp://ftp.ncbi.nlm.nih.gov/geo/samples/GSM1672nnn/GSM1672576/suppl/GSM1672576_CL2005060355AA.CEL.gz	ftp://ftp.ncbi.nlm.nih.gov/geo/samples/GSM1672nnn/GSM1672576/suppl/GSM1672576_CL2005060355AA.mas5.CHP.gz	22283
GSM1672577	Public on May 02 2015	May 01 2015	May 02 2015	RNA	1	DFCI	Homo sapiens	disease_state: Lung Adenocarcinoma	Sex: Female	age: 56	race: Not Reported	vital_status: Alive	clinical_treatment_adjuvant_chemo: Yes	clinical_treatment_adjuvant_rt: Yes	disease_stage: pN0pT1	first_progression_or_relapse: Yes	months_to_first_progression: 12	mths_to_last_clinical_assessment: 40	months_to_last_contact_or_death: 40	smoking_history: Unknown	surgical_margins: ALL MARGINS PATHOLOGICALLY NEGATIVE	organism_part: Lung	histologic_grade: Moderate Differentiation	total RNA	See mage-tab files linked to series entry for additional details	biotin	See mage-tab files linked to series entry for additional details	9606	See mage-tab files linked to series entry for additional details	See mage-tab files linked to series entry for additional details	See mage-tab files linked to series entry for additional details	GPL96	Mervi,,Heiskanen	mervi.heiskanen@nih.gov	2402765175	CBIIT	NCI	9609 Medical Center Drive, 1W378	Rockville	MD	20850	USA	ftp://ftp.ncbi.nlm.nih.gov/geo/samples/GSM1672nnn/GSM1672577/suppl/GSM1672577_CL2005060356AA.CEL.gz	ftp://ftp.ncbi.nlm.nih.gov/geo/samples/GSM1672nnn/GSM1672577/suppl/GSM1672577_CL2005060356AA.mas5.CHP.gz	22283
GSM1672578	Public on May 02 2015	May 01 2015	May 02 2015	RNA	1	DFCI	Homo sapiens	disease_state: Lung Adenocarcinoma	Sex: Male	age: 56	race: Not Reported	vital_status: Alive	clinical_treatment_adjuvant_chemo: No	clinical_treatment_adjuvant_rt: No	disease_stage: pN0pT2	first_progression_or_relapse: --	months_to_first_progression: --	mths_to_last_clinical_assessment: 37	months_to_last_contact_or_death: 37	smoking_history: Smoked in the past	surgical_margins: ALL MARGINS PATHOLOGICALLY NEGATIVE	organism_part: Lung	histologic_grade: Moderate Differentiation	total RNA	See mage-tab files linked to series entry for additional details	biotin	See mage-tab files linked to series entry for additional details	9606	See mage-tab files linked to series entry for additional details	See mage-tab files linked to series entry for additional details	See mage-tab files linked to series entry for additional details	GPL96	Mervi,,Heiskanen	mervi.heiskanen@nih.gov	2402765175	CBIIT	NCI	9609 Medical Center Drive, 1W378	Rockville	MD	20850	USA	ftp://ftp.ncbi.nlm.nih.gov/geo/samples/GSM1672nnn/GSM1672578/suppl/GSM1672578_CL2005060357AA.CEL.gz	ftp://ftp.ncbi.nlm.nih.gov/geo/samples/GSM1672nnn/GSM1672578/suppl/GSM1672578_CL2005060357AA.mas5.CHP.gz	22283
[truncated: 145 more rows]
