# Supplementary material for: Identification of a six-gene metabolic signature predicting overall survival for patients with lung adenocarcinoma
Source: PeerJ. 2020 Dec 2;8:e10320. doi: 10.7717/peerj.10320 (PMC7718790; doi:10.7717/peerj.10320)
Supplement: Supplemental Information 4 [file peerj-08-10320-s004.xls]

## Sheet: 96DEGs
gene	conMean	treatMean	logFC	pValue	fdr
MTHFD2	5.67447	15.4104	1.44135	3.44699e-22	2.11839e-21
PFKP	3.78774	25.7461	2.76495	1.61287e-24	1.34335e-23
IDH1	13.7224	28.1505	1.03663	1.42927e-14	4.18854e-14
GGCT	6.12155	25.7157	2.07068	4.75672e-32	3.76375e-30
CA2	24.7674	9.66405	-1.35774	1.83661e-24	1.50983e-23
ACP5	94.0472	25.5996	-1.87726	2.75594e-27	3.87669e-26
PIP5K1B	8.78138	4.19204	-1.06679	3.09915e-30	8.91711e-29
TXNRD1	8.26898	43.1963	2.38513	6.32623e-06	9.93674e-06
FMO2	37.0511	6.18665	-2.58229	2.44936e-32	2.58407e-30
ACHE	2.1457	5.38234	1.32678	2.87608e-07	5.01532e-07
ALOX5	34.8653	10.8904	-1.67874	4.96359e-27	6.68501e-26
QPRT	4.18188	12.1526	1.53904	4.03858e-06	6.40707e-06
PLA2G4A	2.67549	16.1886	2.5971	1.57729e-11	3.7963e-11
PSAT1	2.00491	11.897	2.56899	6.69059e-29	1.28338e-27
G6PD	8.90095	33.9349	1.93074	1.57587e-05	2.42707e-05
TSTA3	7.24282	23.4337	1.69396	1.18066e-26	1.49471e-25
ASNS	4.35298	9.73587	1.16131	2.05319e-27	3.02249e-26
LPL	39.0689	10.6004	-1.8819	9.87756e-26	1.05975e-24
ALOX15	8.37884	2.81744	-1.57237	4.24707e-12	1.04607e-11
MDH2	18.6156	38.4449	1.04628	2.02897e-22	1.27162e-21
PKM	33.8447	97.3247	1.52388	1.30233e-24	1.10955e-23
ACADL	7.77971	2.96258	-1.39286	6.6917e-32	4.37363e-30
ADH1B	50.1052	6.25329	-3.00227	6.90936e-32	4.37363e-30
ALDH1B1	5.13777	11.4016	1.15002	9.09174e-21	4.60406e-20
FBP1	126.592	37.9791	-1.73692	4.82574e-23	3.32032e-22
OAT	12.074	29.4957	1.28859	6.15645e-14	1.71675e-13
MAOB	15.3879	6.86258	-1.16497	1.31464e-24	1.10955e-23
UGDH	4.94546	30.3323	2.61668	6.25897e-23	4.16416e-22
GPD1	14.9349	2.32902	-2.68089	2.79401e-30	8.84304e-29
SHMT2	5.81741	18.0761	1.63563	2.20969e-29	4.66245e-28
ACSL5	14.6707	30.4275	1.05244	2.03349e-06	3.32609e-06
LDHB	37.4583	107.284	1.51808	1.84586e-09	3.7936e-09
PAPSS2	41.1174	15.8217	-1.37784	1.00675e-25	1.06212e-24
AOC1	1.86816	9.99028	2.4189	7.246e-15	2.18415e-14
PAFAH1B3	3.08574	19.5612	2.66431	9.3388e-29	1.68899e-27
GPI	10.6795	29.3818	1.46008	1.06111e-26	1.37078e-25
ASS1	15.9337	35.0879	1.13889	3.46283e-05	5.19862e-05
CA9	1.53622	10.8119	2.81517	5.37377e-23	3.61873e-22
ALDH3B2	2.33635	5.24213	1.1659	1.50363e-16	5.08982e-16
HK3	12.8604	4.87571	-1.39925	8.16345e-24	5.80614e-23
CA3	6.13059	2.77349	-1.14432	2.0096e-21	1.10615e-20
P4HA1	11.5276	27.3542	1.24667	3.56679e-18	1.41999e-17
SGPL1	6.55392	13.3409	1.02542	7.12808e-28	1.12802e-26
GOT1	8.26828	18.4523	1.15814	1.06849e-20	5.36789e-20
DTYMK	4.87781	11.3585	1.21946	4.48655e-25	4.05712e-24
GSR	10.798	27.6059	1.35421	1.05605e-09	2.22828e-09
PYCR1	0.126307	29.9832	7.89108	1.79947e-32	2.27813e-30
GALE	7.24842	16.0431	1.14621	1.10666e-19	5.07621e-19
AOC3	50.6276	9.15959	-2.46657	3.3783e-32	3.05495e-30
PLA2G1B	23.2992	6.40586	-1.86281	7.63248e-26	8.47606e-25
ITPKA	1.24672	6.59829	2.40396	2.13061e-25	2.10731e-24
CA4	16.6863	3.15838	-2.4014	9.606e-32	5.52782e-30
PYGB	19.0016	38.8096	1.03029	2.81054e-09	5.70215e-09
GCLC	3.69977	12.5611	1.76346	1.11355e-11	2.71107e-11
ALDH18A1	5.72205	22.2626	1.96002	7.093e-33	2.27813e-30
CBR3	3.90294	8.81167	1.17485	5.1455e-09	1.01467e-08
AHCY	12.7456	31.1475	1.28912	3.12015e-21	1.64588e-20
SRM	9.83296	24.5252	1.31857	1.54123e-22	9.75598e-22
CANT1	9.27647	20.4801	1.14258	2.07177e-24	1.63929e-23
MIF	11.0268	31.0362	1.49294	4.75781e-19	2.06281e-18
TPI1	34.0291	129.061	1.92321	2.4856e-26	2.96865e-25
LDHA	18.345	88.2465	2.26615	2.40336e-28	4.11169e-27
ALDH2	38.1943	18.087	-1.07841	1.11348e-23	7.83147e-23
PTGDS	63.5335	19.4344	-1.70891	7.10811e-23	4.63859e-22
RRM2	2.92553	10.9819	1.90836	1.17168e-29	2.74694e-28
CDA	1.88902	13.8334	2.87244	9.33609e-05	0.000134926
LYPLA1	8.65305	18.9543	1.13125	6.2478e-18	2.4115e-17
PTGES	1.5562	18.104	3.54021	2.30125e-26	2.80133e-25
ISYNA1	5.6149	12.2683	1.12761	1.02834e-13	2.81792e-13
APRT	18.6945	37.4975	1.00418	8.09032e-16	2.57345e-15
B4GALT2	5.81692	13.8766	1.25433	1.12457e-27	1.69489e-26
XDH	3.04368	6.18271	1.02242	1.7225e-26	2.13793e-25
HPRT1	8.27992	18.693	1.17481	1.85908e-21	1.04141e-20
HGD	2.02611	7.90826	1.96465	7.7413e-09	1.49855e-08
IDH2	11.3949	37.3754	1.7137	2.31521e-24	1.78723e-23
ATIC	7.63054	19.9084	1.38352	1.40686e-30	4.94746e-29
SEPHS2	13.9366	30.2905	1.11999	7.92846e-19	3.34581e-18
CAT	72.2581	19.4389	-1.89422	1.5765e-32	2.27813e-30
TK1	1.42341	24.0284	4.07731	5.23218e-28	8.49222e-27
LYPLA2	13.1638	28.5846	1.11866	1.69018e-21	9.55255e-21
EPRS	10.3377	23.9371	1.21133	2.11473e-27	3.04232e-26
HMOX1	58.4397	18.6004	-1.65161	9.19208e-07	1.55577e-06
TYMS	4.16304	10.1683	1.28837	3.73745e-27	5.14306e-26
PAICS	4.31196	14.9354	1.79232	1.28475e-32	2.27813e-30
NT5E	3.79402	14.3287	1.91711	2.90466e-09	5.87427e-09
NME4	6.49426	19.2368	1.56663	3.71743e-25	3.51214e-24
ALDOA	34.1673	141.553	2.05065	5.11561e-25	4.56082e-24
POLR2H	6.88286	14.6844	1.09321	2.01567e-29	4.39973e-28
NME1	4.51255	16.1842	1.84257	1.34941e-30	4.94746e-29
GFPT1	7.35564	17.6723	1.26456	2.68322e-28	4.46967e-27
GPX3	218.642	38.9438	-2.48911	1.54413e-30	5.14439e-29
FLAD1	5.11498	12.1802	1.25173	2.71216e-31	1.32061e-29
CP	0.605521	38.7143	5.99855	1.13362e-20	5.65027e-20
CBR1	6.30198	48.3074	2.93837	6.73496e-07	1.16164e-06
PC	3.55004	7.4743	1.0741	1.78836e-25	1.80541e-24
NPR1	14.022	4.06123	-1.78771	1.29428e-30	4.94746e-29

## Sheet: 7 significant genes
id	HR	HR.95L	HR.95H	pvalue
PFKP	1.00995	1.00418	1.01575	0.000699587
PKM	1.00515	1.00255	1.00776	0.000103977
TPI1	1.00335	1.00148	1.00523	0.000447861
LDHA	1.00566	1.00377	1.00756	3.96005e-09
RRM2	1.03177	1.01442	1.04941	0.000299817
PTGES	1.00839	1.00341	1.0134	0.000946407
TYMS	1.03314	1.01572	1.05086	0.000171563
