# Supplementary material for: Identification of a six-gene metabolic signature predicting overall survival for patients with lung adenocarcinoma
Source: PeerJ. 2020 Dec 2;8:e10320. doi: 10.7717/peerj.10320 (PMC7718790; doi:10.7717/peerj.10320)
Supplement: Supplemental Information 5 [file peerj-08-10320-s005.xls]

## Sheet: high-risk group
NAME	GS<br> follow link to MSigDB	GS DETAILS	SIZE	ES	NES	NOM p-val	FDR q-val	FWER p-val	RANK AT MAX	LEADING EDGE
KEGG_CELL_CYCLE	KEGG_CELL_CYCLE	Details ...	124	0.785763	2.4702	0	0	0	5886	tags=65%, list=11%, signal=73%
KEGG_PYRIMIDINE_METABOLISM	KEGG_PYRIMIDINE_METABOLISM	Details ...	98	0.683546	2.35824	0	0	0	5558	tags=55%, list=10%, signal=61%
KEGG_OOCYTE_MEIOSIS	KEGG_OOCYTE_MEIOSIS	Details ...	112	0.619969	2.27673	0	0.000231	0.001	3611	tags=39%, list=7%, signal=42%
KEGG_P53_SIGNALING_PATHWAY	KEGG_P53_SIGNALING_PATHWAY	Details ...	68	0.606699	2.26655	0	0.000174	0.001	5298	tags=43%, list=10%, signal=47%
KEGG_HOMOLOGOUS_RECOMBINATION	KEGG_HOMOLOGOUS_RECOMBINATION	Details ...	28	0.835092	2.21963	0	0.000873	0.005	6751	tags=75%, list=12%, signal=85%
KEGG_UBIQUITIN_MEDIATED_PROTEOLYSIS	KEGG_UBIQUITIN_MEDIATED_PROTEOLYSIS	Details ...	134	0.552654	2.17473	0	0.00110253	0.01	5791	tags=41%, list=10%, signal=46%
KEGG_PATHOGENIC_ESCHERICHIA_COLI_INFECTION	KEGG_PATHOGENIC_ESCHERICHIA_COLI_INFECTION	Details ...	56	0.65146	2.16389	0	0.00135882	0.013	3174	tags=41%, list=6%, signal=44%
KEGG_PROTEASOME	KEGG_PROTEASOME	Details ...	46	0.874211	2.15867	0	0.00123529	0.013	5002	tags=87%, list=9%, signal=96%
KEGG_DNA_REPLICATION	KEGG_DNA_REPLICATION	Details ...	36	0.914283	2.15635	0	0.00113235	0.013	2034	tags=81%, list=4%, signal=84%
KEGG_PENTOSE_PHOSPHATE_PATHWAY	KEGG_PENTOSE_PHOSPHATE_PATHWAY	Details ...	27	0.74489	2.14616	0	0.00116016	0.014	5996	tags=52%, list=11%, signal=58%
KEGG_BASAL_TRANSCRIPTION_FACTORS	KEGG_BASAL_TRANSCRIPTION_FACTORS	Details ...	35	0.679139	2.10346	0	0.00192624	0.023	10415	tags=66%, list=19%, signal=81%
KEGG_PROTEIN_EXPORT	KEGG_PROTEIN_EXPORT	Details ...	24	0.764461	2.08478	0	0.00208759	0.027	10397	tags=79%, list=19%, signal=97%
KEGG_MISMATCH_REPAIR	KEGG_MISMATCH_REPAIR	Details ...	23	0.841193	2.07794	0	0.00216058	0.028	1466	tags=61%, list=3%, signal=63%
KEGG_GLYCOLYSIS_GLUCONEOGENESIS	KEGG_GLYCOLYSIS_GLUCONEOGENESIS	Details ...	62	0.633103	2.06952	0	0.00223507	0.031	1671	tags=31%, list=3%, signal=32%
KEGG_PURINE_METABOLISM	KEGG_PURINE_METABOLISM	Details ...	157	0.513363	2.02219	0	0.00471722	0.062	5741	tags=41%, list=10%, signal=46%
KEGG_CYSTEINE_AND_METHIONINE_METABOLISM	KEGG_CYSTEINE_AND_METHIONINE_METABOLISM	Details ...	34	0.622117	1.97626	0	0.00636975	0.089	7909	tags=53%, list=14%, signal=62%
KEGG_ONE_CARBON_POOL_BY_FOLATE	KEGG_ONE_CARBON_POOL_BY_FOLATE	Details ...	17	0.727822	1.98131	0.00179856	0.00634759	0.085	2564	tags=53%, list=5%, signal=55%
KEGG_GLYOXYLATE_AND_DICARBOXYLATE_METABOLISM	KEGG_GLYOXYLATE_AND_DICARBOXYLATE_METABOLISM	Details ...	16	0.735808	1.88633	0.00185529	0.0126056	0.179	5837	tags=56%, list=11%, signal=63%
KEGG_BASE_EXCISION_REPAIR	KEGG_BASE_EXCISION_REPAIR	Details ...	35	0.727365	2.02907	0.00185874	0.00464178	0.059	7199	tags=69%, list=13%, signal=79%
KEGG_SPLICEOSOME	KEGG_SPLICEOSOME	Details ...	127	0.732493	2.22199	0.0019084	0.000893	0.005	4497	tags=61%, list=8%, signal=66%
KEGG_NUCLEOTIDE_EXCISION_REPAIR	KEGG_NUCLEOTIDE_EXCISION_REPAIR	Details ...	44	0.716309	2.18914	0.00191939	0.00113165	0.009	5510	tags=59%, list=10%, signal=66%
KEGG_ALZHEIMERS_DISEASE	KEGG_ALZHEIMERS_DISEASE	Details ...	165	0.553872	1.88602	0.00191939	0.0121696	0.179	8047	tags=48%, list=15%, signal=56%
KEGG_RNA_DEGRADATION	KEGG_RNA_DEGRADATION	Details ...	59	0.664419	2.20089	0.00192678	0.00117622	0.008	7352	tags=53%, list=13%, signal=61%
KEGG_PROGESTERONE_MEDIATED_OOCYTE_MATURATION	KEGG_PROGESTERONE_MEDIATED_OOCYTE_MATURATION	Details ...	85	0.538776	1.96544	0.0019685	0.00704497	0.099	3611	tags=29%, list=7%, signal=31%
KEGG_FRUCTOSE_AND_MANNOSE_METABOLISM	KEGG_FRUCTOSE_AND_MANNOSE_METABOLISM	Details ...	33	0.595206	1.95341	0.00201207	0.00734742	0.105	5996	tags=39%, list=11%, signal=44%
KEGG_HUNTINGTONS_DISEASE	KEGG_HUNTINGTONS_DISEASE	Details ...	180	0.573894	1.92936	0.00383877	0.00864802	0.126	8047	tags=53%, list=15%, signal=62%
KEGG_RNA_POLYMERASE	KEGG_RNA_POLYMERASE	Details ...	29	0.662763	1.90361	0.00580271	0.0108966	0.157	7736	tags=69%, list=14%, signal=80%
KEGG_RIBOFLAVIN_METABOLISM	KEGG_RIBOFLAVIN_METABOLISM	Details ...	16	0.612853	1.85153	0.00613497	0.0170586	0.236	3559	tags=31%, list=6%, signal=33%
KEGG_BLADDER_CANCER	KEGG_BLADDER_CANCER	Details ...	42	0.471207	1.67577	0.00770713	0.0587716	0.52	8306	tags=50%, list=15%, signal=59%
KEGG_AMYOTROPHIC_LATERAL_SCLEROSIS_ALS	KEGG_AMYOTROPHIC_LATERAL_SCLEROSIS_ALS	Details ...	53	0.479305	1.75967	0.00792079	0.0361165	0.381	9316	tags=43%, list=17%, signal=52%
KEGG_GALACTOSE_METABOLISM	KEGG_GALACTOSE_METABOLISM	Details ...	26	0.598909	1.78191	0.00823045	0.0328366	0.355	4048	tags=38%, list=7%, signal=41%
KEGG_PATHWAYS_IN_CANCER	KEGG_PATHWAYS_IN_CANCER	Details ...	325	0.374676	1.58415	0.0198413	0.0880309	0.666	6661	tags=31%, list=12%, signal=35%
KEGG_SMALL_CELL_LUNG_CANCER	KEGG_SMALL_CELL_LUNG_CANCER	Details ...	84	0.435996	1.63958	0.0199203	0.067494	0.586	6661	tags=36%, list=12%, signal=41%
KEGG_CITRATE_CYCLE_TCA_CYCLE	KEGG_CITRATE_CYCLE_TCA_CYCLE	Details ...	31	0.675711	1.73775	0.0235294	0.0416719	0.415	8905	tags=58%, list=16%, signal=69%
KEGG_PARKINSONS_DISEASE	KEGG_PARKINSONS_DISEASE	Details ...	127	0.629078	1.77245	0.0249042	0.0339044	0.367	8047	tags=57%, list=15%, signal=66%
KEGG_N_GLYCAN_BIOSYNTHESIS	KEGG_N_GLYCAN_BIOSYNTHESIS	Details ...	46	0.510918	1.68199	0.0254403	0.0579924	0.51	7620	tags=41%, list=14%, signal=48%
KEGG_MELANOMA	KEGG_MELANOMA	Details ...	71	0.420241	1.59668	0.0256917	0.0834603	0.647	8395	tags=35%, list=15%, signal=41%
KEGG_RENAL_CELL_CARCINOMA	KEGG_RENAL_CELL_CARCINOMA	Details ...	70	0.443952	1.66261	0.0263692	0.0611783	0.541	4955	tags=34%, list=9%, signal=38%
KEGG_REGULATION_OF_ACTIN_CYTOSKELETON	KEGG_REGULATION_OF_ACTIN_CYTOSKELETON	Details ...	213	0.419126	1.64981	0.0282828	0.0651235	0.564	7537	tags=38%, list=14%, signal=43%
KEGG_THYROID_CANCER	KEGG_THYROID_CANCER	Details ...	29	0.485451	1.54409	0.0315582	0.0999175	0.713	4268	tags=31%, list=8%, signal=34%
KEGG_PANCREATIC_CANCER	KEGG_PANCREATIC_CANCER	Details ...	70	0.444517	1.6237	0.0322581	0.0723263	0.603	8306	tags=41%, list=15%, signal=49%
KEGG_DRUG_METABOLISM_OTHER_ENZYMES	KEGG_DRUG_METABOLISM_OTHER_ENZYMES	Details ...	51	0.460154	1.5546	0.0322581	0.0961905	0.7	3509	tags=18%, list=6%, signal=19%
KEGG_STARCH_AND_SUCROSE_METABOLISM	KEGG_STARCH_AND_SUCROSE_METABOLISM	Details ...	52	0.474393	1.56445	0.0336634	0.0937012	0.685	2601	tags=19%, list=5%, signal=20%
KEGG_AMINOACYL_TRNA_BIOSYNTHESIS	KEGG_AMINOACYL_TRNA_BIOSYNTHESIS	Details ...	22	0.640188	1.7238	0.0341556	0.0445571	0.439	8221	tags=50%, list=15%, signal=59%
KEGG_CHRONIC_MYELOID_LEUKEMIA	KEGG_CHRONIC_MYELOID_LEUKEMIA	Details ...	73	0.425674	1.52449	0.0499002	0.10903	0.738	6539	tags=36%, list=12%, signal=40%

## Sheet: low-risk group
NAME	GS<br> follow link to MSigDB	GS DETAILS	SIZE	ES	NES	NOM p-val	FDR q-val	FWER p-val	RANK AT MAX	LEADING EDGE
KEGG_ARACHIDONIC_ACID_METABOLISM	KEGG_ARACHIDONIC_ACID_METABOLISM	Details ...	58	-0.529822	-1.85836	0	0.100602	0.21	9863	tags=45%, list=18%, signal=55%
KEGG_GLYCEROPHOSPHOLIPID_METABOLISM	KEGG_GLYCEROPHOSPHOLIPID_METABOLISM	Details ...	77	-0.477181	-1.90802	0.00202429	0.127046	0.145	10248	tags=40%, list=19%, signal=49%
KEGG_VASCULAR_SMOOTH_MUSCLE_CONTRACTION	KEGG_VASCULAR_SMOOTH_MUSCLE_CONTRACTION	Details ...	115	-0.507192	-1.9777	0.00205339	0.122628	0.081	5441	tags=35%, list=10%, signal=39%
KEGG_ALPHA_LINOLENIC_ACID_METABOLISM	KEGG_ALPHA_LINOLENIC_ACID_METABOLISM	Details ...	19	-0.604683	-1.8156	0.00208768	0.113277	0.277	10337	tags=58%, list=19%, signal=71%
KEGG_PRIMARY_BILE_ACID_BIOSYNTHESIS	KEGG_PRIMARY_BILE_ACID_BIOSYNTHESIS	Details ...	16	-0.622759	-1.76276	0.00381679	0.109323	0.374	10668	tags=63%, list=19%, signal=77%
KEGG_ALDOSTERONE_REGULATED_SODIUM_REABSORPTION	KEGG_ALDOSTERONE_REGULATED_SODIUM_REABSORPTION	Details ...	42	-0.563344	-1.89224	0.00391389	0.0985008	0.165	7067	tags=43%, list=13%, signal=49%
KEGG_GNRH_SIGNALING_PATHWAY	KEGG_GNRH_SIGNALING_PATHWAY	Details ...	101	-0.450818	-1.76305	0.00635593	0.124766	0.374	5441	tags=29%, list=10%, signal=32%
KEGG_LINOLEIC_ACID_METABOLISM	KEGG_LINOLEIC_ACID_METABOLISM	Details ...	29	-0.554693	-1.76957	0.00833333	0.138467	0.355	9863	tags=45%, list=18%, signal=55%
KEGG_ETHER_LIPID_METABOLISM	KEGG_ETHER_LIPID_METABOLISM	Details ...	33	-0.510667	-1.72507	0.0105042	0.128635	0.438	9644	tags=52%, list=17%, signal=62%
KEGG_ABC_TRANSPORTERS	KEGG_ABC_TRANSPORTERS	Details ...	44	-0.479476	-1.67884	0.011811	0.145303	0.506	9185	tags=41%, list=17%, signal=49%
KEGG_PHOSPHATIDYLINOSITOL_SIGNALING_SYSTEM	KEGG_PHOSPHATIDYLINOSITOL_SIGNALING_SYSTEM	Details ...	76	-0.477571	-1.71459	0.0123967	0.124396	0.452	7867	tags=39%, list=14%, signal=46%
KEGG_PPAR_SIGNALING_PATHWAY	KEGG_PPAR_SIGNALING_PATHWAY	Details ...	69	-0.406085	-1.49275	0.0181818	0.300256	0.783	11131	tags=39%, list=20%, signal=49%
KEGG_VASOPRESSIN_REGULATED_WATER_REABSORPTION	KEGG_VASOPRESSIN_REGULATED_WATER_REABSORPTION	Details ...	44	-0.434054	-1.50671	0.037037	0.298831	0.766	6132	tags=30%, list=11%, signal=33%
KEGG_FATTY_ACID_METABOLISM	KEGG_FATTY_ACID_METABOLISM	Details ...	42	-0.499867	-1.59709	0.0408998	0.225866	0.632	11232	tags=50%, list=20%, signal=63%
