# Supplementary material for: Identification of a six-gene metabolic signature predicting overall survival for patients with lung adenocarcinoma
Source: PeerJ. 2020 Dec 2;8:e10320. doi: 10.7717/peerj.10320 (PMC7718790; doi:10.7717/peerj.10320)
Supplement: Supplemental Information 6 [file peerj-08-10320-s006.xls]

## Sheet: CYSTEINE AND METHIONINE
CYSTEINE AND METHIONINE METABOLISM PATHWAY
NAME	PROBE	DESCRIPTION<br>(from dataset)	GENE SYMBOL	GENE_TITLE	RANK IN GENE LIST	RANK METRIC SCORE	RUNNING ES	CORE ENRICHMENT
row_0	LDHA	na	null	null	1	0.698903	0.136038	Yes
row_1	SMS	na	null	null	167	0.404031	0.211704	Yes
row_2	ENOPH1	na	null	null	247	0.368492	0.282008	Yes
row_3	AHCY	na	null	null	749	0.272049	0.325898	Yes
row_4	IL4I1	na	null	null	881	0.256574	0.373473	Yes
row_5	GOT2	na	null	null	1181	0.23323	0.413463	Yes
row_6	SRM	na	null	null	1344	0.223323	0.454005	Yes
row_7	AMD1	na	null	null	1410	0.218922	0.495446	Yes
row_8	DNMT1	na	null	null	2103	0.182265	0.518399	Yes
row_9	DNMT3B	na	null	null	2538	0.166015	0.54286	Yes
row_10	MTAP	na	null	null	2742	0.159592	0.570253	Yes
row_11	GOT1	na	null	null	3506	0.139443	0.583584	Yes
row_12	CBS	na	null	null	4076	0.127649	0.598133	Yes
row_13	LDHC	na	null	null	4503	0.119684	0.613719	Yes
row_14	LDHB	na	null	null	5595	0.10377	0.614168	Yes
row_15	MAT1A	na	null	null	6239	0.0954553	0.621109	Yes
row_16	SDS	na	null	null	7690	0.0811578	0.610657	Yes
row_17	CTH	na	null	null	7909	0.079142	0.622117	Yes
row_18	DNMT3A	na	null	null	11807	0.0538802	0.562052	No
row_19	TAT	na	null	null	16908	0.025267	0.474638	No
row_20	APIP	na	null	null	16955	0.0250052	0.478673	No
row_21	LDHAL6A	na	null	null	18404	0.0177925	0.455922	No
row_22	MAT2B	na	null	null	19866	0.0104979	0.431515	No
row_23	LDHAL6B	na	null	null	29617	-0.0231623	0.259505	No
row_24	DNMT3L	na	null	null	31178	-0.0301032	0.237123	No
row_25	AHCYL1	na	null	null	37926	-0.0583437	0.12633	No
row_26	MPST	na	null	null	40942	-0.0710951	0.0855847	No
row_27	BHMT	na	null	null	41051	-0.0715106	0.0975504	No
row_28	MAT2A	na	null	null	41700	-0.0744289	0.100308	No
row_29	TRDMT1	na	null	null	44140	-0.0868945	0.0730669	No
row_30	ADI1	na	null	null	44793	-0.0907805	0.0789351	No
row_31	CDO1	na	null	null	51163	-0.156902	-0.00582802	No
row_32	AHCYL2	na	null	null	53047	-0.197778	-0.00141721	No
row_33	MTR	na	null	null	53582	-0.213741	0.0305242	No

## Sheet: FRUCTOSE AND MANNOSE
FRUCTOSE AND MANNOSE METABOLISM PATHWAY
NAME	PROBE	DESCRIPTION<br>(from dataset)	GENE SYMBOL	GENE_TITLE	RANK IN GENE LIST	RANK METRIC SCORE	RUNNING ES	CORE ENRICHMENT
row_0	TPI1	na	null	null	4	0.602161	0.124804	Yes
row_1	ALDOA	na	null	null	124	0.425836	0.210959	Yes
row_2	PFKFB4	na	null	null	180	0.398482	0.292601	Yes
row_3	PFKP	na	null	null	185	0.39534	0.374514	Yes
row_4	HK2	na	null	null	258	0.365156	0.448937	Yes
row_5	AKR1B1	na	null	null	1304	0.225774	0.476839	Yes
row_6	MTMR2	na	null	null	1408	0.219214	0.520435	Yes
row_7	ALDOC	na	null	null	1609	0.207519	0.55985	Yes
row_8	SORD	na	null	null	4110	0.12689	0.540904	Yes
row_9	KHK	na	null	null	4632	0.117257	0.555788	Yes
row_10	GMPPA	na	null	null	5449	0.105418	0.562877	Yes
row_11	AKR1B10	na	null	null	5478	0.104992	0.584143	Yes
row_12	PFKM	na	null	null	5996	0.0984784	0.595206	Yes
row_13	PMM2	na	null	null	7476	0.0828245	0.585606	No
row_14	GMDS	na	null	null	8918	0.0717061	0.574389	No
row_15	HK1	na	null	null	10472	0.0619374	0.559118	No
row_16	MPI	na	null	null	11534	0.0556014	0.55144	No
row_17	PFKFB3	na	null	null	14988	0.0355766	0.496304	No
row_18	PFKL	na	null	null	16194	0.0290742	0.480518	No
row_19	FPGT	na	null	null	17597	0.0218299	0.459663	No
row_20	GMPPB	na	null	null	18887	0.0153747	0.439515	No
row_21	ALDOB	na	null	null	22166	0.00115649	0.38041	No
row_22	MTMR1	na	null	null	25176	-0.00312216	0.326582	No
row_23	HK3	na	null	null	26202	-0.00749362	0.309579	No
row_24	PHPT1	na	null	null	30555	-0.0275845	0.23651	No
row_25	MTMR6	na	null	null	34164	-0.0429489	0.180097	No
row_26	PFKFB1	na	null	null	38080	-0.0590174	0.121459	No
row_27	MTMR7	na	null	null	43309	-0.0824197	0.0439025	No
row_28	TSTA3	na	null	null	43575	-0.0836895	0.0564605	No
row_29	FBP2	na	null	null	43712	-0.0845464	0.0715316	No
row_30	PFKFB2	na	null	null	46785	-0.104984	0.0376873	No
row_31	FBP1	na	null	null	53905	-0.225577	-0.0444158	No
row_32	PMM1	na	null	null	55085	-0.333078	0.00331317	No

## Sheet: PURINE METABOLISM
PURINE METABOLISM PATHWAY
NAME	PROBE	DESCRIPTION<br>(from dataset)	GENE SYMBOL	GENE_TITLE	RANK IN GENE LIST	RANK METRIC SCORE	RUNNING ES	CORE ENRICHMENT
row_0	PKM	na	null	null	3	0.631788	0.0254017	Yes
row_1	RRM2	na	null	null	32	0.500017	0.0450404	Yes
row_2	RRM1	na	null	null	80	0.45381	0.0624727	Yes
row_3	PAICS	na	null	null	99	0.439822	0.0798675	Yes
row_4	AK4	na	null	null	120	0.427203	0.0967175	Yes
row_5	PNP	na	null	null	135	0.41846	0.113324	Yes
row_6	POLA2	na	null	null	153	0.410028	0.129537	Yes
row_7	GMPS	na	null	null	187	0.393996	0.144813	Yes
row_8	NME1	na	null	null	201	0.3892	0.160259	Yes
row_9	HPRT1	na	null	null	205	0.387088	0.175801	Yes
row_10	POLR3G	na	null	null	331	0.34326	0.187364	Yes
row_11	PPAT	na	null	null	363	0.333843	0.200252	Yes
row_12	PRIM1	na	null	null	388	0.326622	0.212977	Yes
row_13	POLE3	na	null	null	397	0.32515	0.225933	Yes
row_14	PRIM2	na	null	null	481	0.31189	0.236994	Yes
row_15	ATIC	na	null	null	551	0.298233	0.247758	Yes
row_16	GART	na	null	null	582	0.293128	0.259025	Yes
row_17	POLE2	na	null	null	615	0.287601	0.270032	Yes
row_18	POLD2	na	null	null	736	0.273102	0.278859	Yes
row_19	NME2	na	null	null	828	0.26107	0.287727	Yes
row_20	NUDT2	na	null	null	864	0.25848	0.297506	Yes
row_21	POLE4	na	null	null	891	0.255671	0.307336	Yes
row_22	POLR2H	na	null	null	1063	0.24218	0.313991	Yes
row_23	POLE	na	null	null	1143	0.236232	0.322076	Yes
row_24	ADA	na	null	null	1184	0.233028	0.330739	Yes
row_25	ADSL	na	null	null	1215	0.230938	0.3395	Yes
row_26	POLR2G	na	null	null	1294	0.226219	0.3472	Yes
row_27	POLD3	na	null	null	1319	0.225116	0.355835	Yes
row_28	POLD1	na	null	null	1360	0.222553	0.364076	Yes
row_29	PNPT1	na	null	null	1366	0.222228	0.372939	Yes
row_30	DCK	na	null	null	1440	0.216802	0.38035	Yes
row_31	PRPS1	na	null	null	1506	0.212842	0.387747	Yes
row_32	NT5C3A	na	null	null	1566	0.210082	0.395141	Yes
row_33	NME1-NME2	na	null	null	1587	0.208646	0.403185	Yes
row_34	PDE10A	na	null	null	1674	0.204186	0.409851	Yes
row_35	POLR1B	na	null	null	1687	0.20351	0.417833	Yes
row_36	CANT1	na	null	null	1757	0.199199	0.424608	Yes
row_37	DGUOK	na	null	null	1784	0.196996	0.432073	Yes
row_38	ENPP1	na	null	null	1949	0.188799	0.436705	Yes
row_39	POLA1	na	null	null	2034	0.185137	0.44264	Yes
row_40	ADCY3	na	null	null	2261	0.175882	0.445626	Yes
row_41	PDE6A	na	null	null	2378	0.171868	0.450446	Yes
row_42	POLR1A	na	null	null	2528	0.166589	0.454455	Yes
row_43	POLR2B	na	null	null	2566	0.165048	0.460434	Yes
row_44	POLR2K	na	null	null	2664	0.162152	0.465207	Yes
row_45	XDH	na	null	null	2757	0.159263	0.469955	Yes
row_46	NT5E	na	null	null	2801	0.158144	0.475546	Yes
row_47	POLR1E	na	null	null	2809	0.157809	0.481778	Yes
row_48	POLR2D	na	null	null	3235	0.145937	0.479946	Yes
row_49	PDE6D	na	null	null	3442	0.14072	0.481879	Yes
row_50	POLR2J	na	null	null	3508	0.139361	0.486314	Yes
row_51	NME6	na	null	null	3512	0.139324	0.491874	Yes
row_52	PRPS2	na	null	null	3557	0.138565	0.496658	Yes
row_53	GDA	na	null	null	3986	0.129248	0.4941	Yes
row_54	NME7	na	null	null	4088	0.127279	0.497396	Yes
row_55	NME4	na	null	null	4104	0.127098	0.502245	Yes
row_56	POLR3D	na	null	null	4282	0.123406	0.504005	Yes
row_57	POLR3K	na	null	null	4357	0.122081	0.507581	Yes
row_58	POLR2E	na	null	null	4698	0.116141	0.506092	Yes
row_59	AK5	na	null	null	4897	0.113067	0.507055	Yes
row_60	POLD4	na	null	null	4924	0.112683	0.511123	Yes
row_61	POLR3F	na	null	null	5220	0.108618	0.510147	Yes
row_62	IMPDH1	na	null	null	5328	0.107222	0.512526	Yes
row_63	ZNRD1	na	null	null	5558	0.104144	0.512567	Yes
row_64	NUDT5	na	null	null	5741	0.10171	0.513363	Yes
row_65	POLR3A	na	null	null	6117	0.096999	0.510467	No
row_66	POLR2I	na	null	null	6560	0.0919984	0.506153	No
row_67	POLR3B	na	null	null	6667	0.0909839	0.507896	No
row_68	POLR3C	na	null	null	7007	0.0874874	0.50527	No
row_69	POLR1C	na	null	null	7736	0.0806352	0.495309	No
row_70	APRT	na	null	null	7769	0.0804034	0.497968	No
row_71	GUCY2C	na	null	null	8139	0.0772978	0.494387	No
row_72	ADCY1	na	null	null	8560	0.0741931	0.489756	No
row_73	GUK1	na	null	null	8878	0.0719777	0.486904	No
row_74	PRPS1L1	na	null	null	9137	0.0703328	0.485057	No
row_75	ENTPD2	na	null	null	9526	0.0676981	0.480744	No
row_76	NT5M	na	null	null	10734	0.0603149	0.461274	No
row_77	IMPDH2	na	null	null	11147	0.0578636	0.456129	No
row_78	AMPD3	na	null	null	12286	0.0509014	0.437531	No
row_79	NT5C2	na	null	null	13916	0.0416275	0.409651	No
row_80	PDE6H	na	null	null	14217	0.0398511	0.405813	No
row_81	ADCY8	na	null	null	14810	0.0366165	0.396546	No
row_82	ADK	na	null	null	14969	0.0356652	0.395117	No
row_83	NT5C	na	null	null	15443	0.0330413	0.387865	No
row_84	GMPR2	na	null	null	15978	0.0301641	0.379391	No
row_85	ENPP3	na	null	null	16195	0.0290443	0.376642	No
row_86	AK2	na	null	null	17937	0.0200567	0.34586	No
row_87	POLR2L	na	null	null	18293	0.0183123	0.340157	No
row_88	PDE7A	na	null	null	18861	0.015525	0.330494	No
row_89	POLR2J3	na	null	null	19343	0.0131627	0.322297	No
row_90	ENTPD5	na	null	null	19687	0.0114011	0.316532	No
row_91	ALLC	na	null	null	20592	0.00730156	0.300424	No
row_92	AMPD2	na	null	null	21881	0.00224127	0.277143	No
row_93	PAPSS1	na	null	null	22306	0.000730115	0.269479	No
row_94	POLR2J2	na	null	null	24465	-0.000507045	0.230343	No
row_95	ADCY10	na	null	null	24575	-0.000882998	0.228401	No
row_96	PDE1B	na	null	null	24683	-0.00123766	0.226509	No
row_97	PDE4B	na	null	null	26139	-0.00724687	0.200401	No
row_98	ITPA	na	null	null	27180	-0.0118149	0.182006	No
row_99	POLR1D	na	null	null	28989	-0.0201982	0.150014	No
row_100	PFAS	na	null	null	29504	-0.0225816	0.141597	No
row_101	POLR2A	na	null	null	29551	-0.0228524	0.141683	No
row_102	PDE11A	na	null	null	30112	-0.0254864	0.132549	No
row_103	PDE3A	na	null	null	30646	-0.0279892	0.124006	No
row_104	PKLR	na	null	null	31328	-0.0308313	0.112891	No
row_105	PDE1C	na	null	null	31599	-0.0321567	0.109288	No
row_106	ADCY2	na	null	null	32719	-0.0367328	0.0904638	No
row_107	URAD	na	null	null	33945	-0.0419986	0.0699285	No
row_108	ENTPD6	na	null	null	34201	-0.0430921	0.0670378	No
row_109	NUDT9	na	null	null	34445	-0.044005	0.0644017	No
row_110	PDE6G	na	null	null	35963	-0.0502377	0.0389001	No
row_111	PDE2A	na	null	null	38207	-0.059506	0.000598813	No
row_112	ENTPD8	na	null	null	41902	-0.0753005	-0.0633943	No
row_113	ENTPD1	na	null	null	41936	-0.0754723	-0.0609521	No
row_114	PDE9A	na	null	null	42715	-0.079395	-0.0718698	No
row_115	PAPSS2	na	null	null	43055	-0.0811896	-0.0747497	No
row_116	NT5C1B	na	null	null	43142	-0.0816848	-0.0730188	No
row_117	ADCY5	na	null	null	45179	-0.0933484	-0.106201	No
row_118	PRUNE1	na	null	null	45669	-0.0964877	-0.111186	No
row_119	POLR2F	na	null	null	45708	-0.0966701	-0.10798	No
row_120	GUCY2F	na	null	null	46570	-0.103473	-0.119434	No
row_121	PDE1A	na	null	null	46650	-0.104022	-0.116676	No
row_122	POLR2C	na	null	null	47343	-0.109517	-0.124819	No
row_123	GUCY1B1	na	null	null	47900	-0.11435	-0.130301	No
row_124	ADPRM	na	null	null	48382	-0.119639	-0.134208	No
row_125	PDE8A	na	null	null	48665	-0.122728	-0.13438	No
row_126	PDE7B	na	null	null	48947	-0.125812	-0.134409	No
row_127	PDE5A	na	null	null	49051	-0.127199	-0.131153	No
row_128	PDE4D	na	null	null	49396	-0.131768	-0.132085	No
row_129	AK7	na	null	null	50139	-0.141149	-0.139862	No
row_130	ENTPD4	na	null	null	50299	-0.143391	-0.136969	No
row_131	NME5	na	null	null	50738	-0.150436	-0.138855	No
row_132	GUCY1A1	na	null	null	51197	-0.157388	-0.140824	No
row_133	NME3	na	null	null	51326	-0.159544	-0.136718	No
row_134	PDE4A	na	null	null	51392	-0.160568	-0.131428	No
row_135	PDE3B	na	null	null	51845	-0.169101	-0.132816	No
row_136	PDE4C	na	null	null	51995	-0.172756	-0.128559	No
row_137	PDE6C	na	null	null	52028	-0.173529	-0.122148	No
row_138	FHIT	na	null	null	52505	-0.183327	-0.123398	No
row_139	ENTPD3	na	null	null	52516	-0.183637	-0.11618	No
row_140	AMPD1	na	null	null	52649	-0.1868	-0.111049	No
row_141	RRM2B	na	null	null	52732	-0.189013	-0.104921	No
row_142	ADCY7	na	null	null	52808	-0.191027	-0.0985849	No
row_143	POLR3GL	na	null	null	53326	-0.205711	-0.0996773	No
row_144	PDE6B	na	null	null	53695	-0.217921	-0.0975741	No
row_145	GMPR	na	null	null	53771	-0.220696	-0.0900426	No
row_146	GUCY1A2	na	null	null	53875	-0.224219	-0.0828772	No
row_147	ADCY6	na	null	null	53884	-0.224752	-0.0739666	No
row_148	NT5C1A	na	null	null	53903	-0.225517	-0.0652067	No
row_149	NPR2	na	null	null	54087	-0.234041	-0.0590972	No
row_150	PDE8B	na	null	null	54143	-0.236999	-0.0505459	No
row_151	POLR3H	na	null	null	54287	-0.245299	-0.043257	No
row_152	GUCY2D	na	null	null	54395	-0.251554	-0.0350628	No
row_153	ADCY4	na	null	null	54559	-0.262149	-0.0274578	No
row_154	ADCY9	na	null	null	55028	-0.322086	-0.0229721	No
row_155	AK1	na	null	null	55053	-0.325771	-0.0102815	No
row_156	NPR1	na	null	null	55141	-0.351545	0.00230439	No

## Sheet: PYRIMIDINE METABOLISM
PYRIMIDINE METABOLISM PATHWAY
NAME	PROBE	DESCRIPTION<br>(from dataset)	GENE SYMBOL	GENE_TITLE	RANK IN GENE LIST	RANK METRIC SCORE	RUNNING ES	CORE ENRICHMENT
row_0	TYMS	na	null	null	9	0.556713	0.0326843	Yes
row_1	TK1	na	null	null	25	0.508075	0.06239	Yes
row_2	RRM2	na	null	null	32	0.500017	0.0917835	Yes
row_3	RRM1	na	null	null	80	0.45381	0.117707	Yes
row_4	PNP	na	null	null	135	0.41846	0.141419	Yes
row_5	POLA2	na	null	null	153	0.410028	0.165303	Yes
row_6	DTYMK	na	null	null	154	0.40994	0.189491	Yes
row_7	NME1	na	null	null	201	0.3892	0.211621	Yes
row_8	UCK2	na	null	null	311	0.348636	0.230216	Yes
row_9	POLR3G	na	null	null	331	0.34326	0.250124	Yes
row_10	DUT	na	null	null	380	0.329384	0.268689	Yes
row_11	PRIM1	na	null	null	388	0.326622	0.287833	Yes
row_12	POLE3	na	null	null	397	0.32515	0.306873	Yes
row_13	PRIM2	na	null	null	481	0.31189	0.323771	Yes
row_14	CDA	na	null	null	614	0.287605	0.338348	Yes
row_15	POLE2	na	null	null	615	0.287601	0.355317	Yes
row_16	CTPS1	na	null	null	636	0.284773	0.371757	Yes
row_17	POLD2	na	null	null	736	0.273102	0.386076	Yes
row_18	NME2	na	null	null	828	0.26107	0.39983	Yes
row_19	NUDT2	na	null	null	864	0.25848	0.414447	Yes
row_20	POLE4	na	null	null	891	0.255671	0.429061	Yes
row_21	UMPS	na	null	null	1040	0.243777	0.440762	Yes
row_22	POLR2H	na	null	null	1063	0.24218	0.454652	Yes
row_23	POLE	na	null	null	1143	0.236232	0.467158	Yes
row_24	TXNRD1	na	null	null	1257	0.228311	0.478581	Yes
row_25	POLR2G	na	null	null	1294	0.226219	0.491276	Yes
row_26	POLD3	na	null	null	1319	0.225116	0.504123	Yes
row_27	POLD1	na	null	null	1360	0.222553	0.51653	Yes
row_28	PNPT1	na	null	null	1366	0.222228	0.529551	Yes
row_29	DCK	na	null	null	1440	0.216802	0.54102	Yes
row_30	NT5C3A	na	null	null	1566	0.210082	0.551149	Yes
row_31	NME1-NME2	na	null	null	1587	0.208646	0.563097	Yes
row_32	POLR1B	na	null	null	1687	0.20351	0.573311	Yes
row_33	CANT1	na	null	null	1757	0.199199	0.583813	Yes
row_34	UPP1	na	null	null	1890	0.191764	0.592735	Yes
row_35	POLA1	na	null	null	2034	0.185137	0.601067	Yes
row_36	POLR1A	na	null	null	2528	0.166589	0.60196	Yes
row_37	POLR2B	na	null	null	2566	0.165048	0.611028	Yes
row_38	POLR2K	na	null	null	2664	0.162152	0.618837	Yes
row_39	CAD	na	null	null	2736	0.159774	0.626977	Yes
row_40	NT5E	na	null	null	2801	0.158144	0.635148	Yes
row_41	POLR1E	na	null	null	2809	0.157809	0.644332	Yes
row_42	POLR2D	na	null	null	3235	0.145937	0.645239	Yes
row_43	POLR2J	na	null	null	3508	0.139361	0.648532	Yes
row_44	TYMP	na	null	null	3509	0.139353	0.656754	Yes
row_45	NME6	na	null	null	3512	0.139324	0.664938	Yes
row_46	NME7	na	null	null	4088	0.127279	0.662026	Yes
row_47	NME4	na	null	null	4104	0.127098	0.669253	Yes
row_48	POLR3D	na	null	null	4282	0.123406	0.673326	Yes
row_49	POLR3K	na	null	null	4357	0.122081	0.679188	Yes
row_50	POLR2E	na	null	null	4698	0.116141	0.679878	Yes
row_51	POLD4	na	null	null	4924	0.112683	0.682448	Yes
row_52	POLR3F	na	null	null	5220	0.108618	0.68351	Yes
row_53	ZNRD1	na	null	null	5558	0.104144	0.683546	Yes
row_54	POLR3A	na	null	null	6117	0.096999	0.679156	No
row_55	POLR2I	na	null	null	6560	0.0919984	0.676572	No
row_56	POLR3B	na	null	null	6667	0.0909839	0.680019	No
row_57	POLR3C	na	null	null	7007	0.0874874	0.679037	No
row_58	CMPK2	na	null	null	7264	0.0849713	0.67941	No
row_59	POLR1C	na	null	null	7736	0.0806352	0.675631	No
row_60	NT5M	na	null	null	10734	0.0603149	0.624867	No
row_61	NT5C2	na	null	null	13916	0.0416275	0.569666	No
row_62	NT5C	na	null	null	15443	0.0330413	0.543956	No
row_63	CMPK1	na	null	null	15947	0.0303574	0.53663	No
row_64	POLR2L	na	null	null	18293	0.0183123	0.495207	No
row_65	POLR2J3	na	null	null	19343	0.0131627	0.47697	No
row_66	ENTPD5	na	null	null	19687	0.0114011	0.471425	No
row_67	UCK1	na	null	null	20635	0.00710425	0.45468	No
row_68	POLR2J2	na	null	null	24465	-0.000507045	0.385307	No
row_69	DPYD	na	null	null	25123	-0.00291129	0.373571	No
row_70	ITPA	na	null	null	27180	-0.0118149	0.337002	No
row_71	DCTD	na	null	null	28843	-0.0195188	0.308029	No
row_72	POLR1D	na	null	null	28989	-0.0201982	0.306592	No
row_73	POLR2A	na	null	null	29551	-0.0228524	0.297772	No
row_74	CTPS2	na	null	null	32497	-0.0359194	0.246512	No
row_75	AK3	na	null	null	33184	-0.038654	0.236359	No
row_76	ENTPD6	na	null	null	34201	-0.0430921	0.220486	No
row_77	TK2	na	null	null	38886	-0.0622928	0.139262	No
row_78	UCKL1	na	null	null	40465	-0.068996	0.114731	No
row_79	UPB1	na	null	null	40948	-0.0711227	0.110191	No
row_80	ENTPD8	na	null	null	41902	-0.0753005	0.09736	No
row_81	ENTPD1	na	null	null	41936	-0.0754723	0.101215	No
row_82	DHODH	na	null	null	42675	-0.0791854	0.0925104	No
row_83	NT5C1B	na	null	null	43142	-0.0816848	0.0888835	No
row_84	DPYS	na	null	null	43787	-0.0849179	0.0822211	No
row_85	POLR2F	na	null	null	45708	-0.0966701	0.053124	No
row_86	UPP2	na	null	null	45863	-0.0978952	0.0561087	No
row_87	POLR2C	na	null	null	47343	-0.109517	0.0357629	No
row_88	ENTPD4	na	null	null	50299	-0.143391	-0.00933741	No
row_89	UPRT	na	null	null	50716	-0.150024	-0.00802585	No
row_90	NME5	na	null	null	50738	-0.150436	0.000469595	No
row_91	NME3	na	null	null	51326	-0.159544	-0.000756589	No
row_92	TXNRD2	na	null	null	51996	-0.17278	-0.00268811	No
row_93	ENTPD3	na	null	null	52516	-0.183637	-0.00126019	No
row_94	RRM2B	na	null	null	52732	-0.189013	0.00599508	No
row_95	POLR3GL	na	null	null	53326	-0.205711	0.00738412	No
row_96	NT5C1A	na	null	null	53903	-0.225517	0.0102499	No
row_97	POLR3H	na	null	null	54287	-0.245299	0.0177811	No

## Sheet: ARACHIDONIC ACID METABOLISM
ARACHIDONIC ACID METABOLISM PATHWAY
NAME	PROBE	DESCRIPTION<br>(from dataset)	GENE SYMBOL	GENE_TITLE	RANK IN GENE LIST	RANK METRIC SCORE	RUNNING ES	CORE ENRICHMENT
row_0	PTGES	na	null	null	999	0.246674	0.0171814	No
row_1	PTGES2	na	null	null	2439	0.169562	0.015366	No
row_2	CYP4F3	na	null	null	2938	0.15414	0.0283889	No
row_3	GPX7	na	null	null	3799	0.133331	0.0318793	No
row_4	GPX1	na	null	null	3923	0.130717	0.0483447	No
row_5	PLA2G4A	na	null	null	8244	0.0764851	-0.0189628	No
row_6	AKR1C3	na	null	null	8914	0.0717161	-0.0208242	No
row_7	GPX2	na	null	null	9529	0.0676869	-0.0222656	No
row_8	PTGS2	na	null	null	10091	0.0643353	-0.0232263	No
row_9	CYP4F2	na	null	null	10571	0.0613103	-0.0231344	No
row_10	CYP2B6	na	null	null	12311	0.0507509	-0.0473741	No
row_11	PLA2G2F	na	null	null	14501	0.0382965	-0.0815454	No
row_12	PTGS1	na	null	null	15367	0.0334765	-0.0924253	No
row_13	GPX6	na	null	null	16860	0.0255944	-0.115789	No
row_14	GPX5	na	null	null	17362	0.0230374	-0.121569	No
row_15	GPX4	na	null	null	18604	0.0167809	-0.141646	No
row_16	PLA2G2D	na	null	null	19547	0.012053	-0.156984	No
row_17	CYP2C18	na	null	null	19711	0.0112776	-0.158324	No
row_18	ALOX12B	na	null	null	21213	0.00471539	-0.184836	No
row_19	GPX3	na	null	null	21337	0.0042745	-0.186453	No
row_20	PLA2G2C	na	null	null	26612	-0.00932433	-0.280644	No
row_21	CYP2E1	na	null	null	29422	-0.022262	-0.328338	No
row_22	ALOX12	na	null	null	29995	-0.0249102	-0.335136	No
row_23	CYP2C19	na	null	null	33990	-0.0422508	-0.401434	No
row_24	PLA2G2E	na	null	null	35962	-0.0502337	-0.42995	No
row_25	PLA2G5	na	null	null	36430	-0.0523114	-0.430928	No
row_26	PTGIS	na	null	null	39345	-0.0641971	-0.474526	No
row_27	CYP2C9	na	null	null	40162	-0.0676759	-0.479628	No
row_28	PLA2G3	na	null	null	41169	-0.0719868	-0.487555	No
row_29	ALOX5	na	null	null	42045	-0.076043	-0.492528	No
row_30	CBR3	na	null	null	42395	-0.0777617	-0.487729	No
row_31	CYP4A11	na	null	null	44139	-0.0868904	-0.506873	No
row_32	CYP2C8	na	null	null	45407	-0.0948569	-0.516257	Yes
row_33	PLA2G2A	na	null	null	45626	-0.0962303	-0.506444	Yes
row_34	ALOX15	na	null	null	46233	-0.100626	-0.50303	Yes
row_35	TBXAS1	na	null	null	46432	-0.102221	-0.491998	Yes
row_36	PLA2G4E	na	null	null	47384	-0.109778	-0.493524	Yes
row_37	CYP2J2	na	null	null	47490	-0.110636	-0.479604	Yes
row_38	PLA2G12A	na	null	null	48798	-0.124012	-0.485542	Yes
row_39	CYP4A22	na	null	null	49843	-0.137029	-0.484856	Yes
row_40	CBR1	na	null	null	50159	-0.141438	-0.470335	Yes
row_41	PLA2G6	na	null	null	51080	-0.155626	-0.464743	Yes
row_42	GGT5	na	null	null	51131	-0.156517	-0.443266	Yes
row_43	PLA2G4B	na	null	null	52127	-0.175649	-0.436169	Yes
row_44	LTA4H	na	null	null	52237	-0.177689	-0.412732	Yes
row_45	HPGDS	na	null	null	52491	-0.182993	-0.391146	Yes
row_46	GGT1	na	null	null	52742	-0.189126	-0.368628	Yes
row_47	PLA2G12B	na	null	null	52781	-0.19032	-0.342099	Yes
row_48	CYP2U1	na	null	null	52903	-0.193484	-0.316622	Yes
row_49	PLA2G1B	na	null	null	53605	-0.214589	-0.298631	Yes
row_50	GGT7	na	null	null	54150	-0.237336	-0.274544	Yes
row_51	ALOX15B	na	null	null	54225	-0.241533	-0.241344	Yes
row_52	LTC4S	na	null	null	54543	-0.261165	-0.209737	Yes
row_53	GGT6	na	null	null	54697	-0.27486	-0.173202	Yes
row_54	PLA2G10	na	null	null	54792	-0.284503	-0.134219	Yes
row_55	PTGDS	na	null	null	54947	-0.307452	-0.0930414	Yes
row_56	JMJD7-PLA2G4B	na	null	null	55020	-0.318902	-0.0487409	Yes
row_57	EPHX2	na	null	null	55187	-0.372116	0.00146695	Yes
